# Supplementary material for: Identifying C1QB, ITGAM, and ITGB2 as potential diagnostic candidate genes for diabetic nephropathy using bioinformatics analysis
Source: PeerJ journal article supplement (doi:10.7717/peerj.15437), 2023-05-25
Supplement: PCRdata.zip [file PCRdata.zip]

---

# Report of the fluorescence quantitative PCR experiment

## I、Experimental parameters

Subjects: Rat blood samples

Experimental groups: normal group, diabetic group

Target genes: C1QB, ITGAM, ITGB2, HLA-DPA1, IRF8

## II、Laboratory equipment and reagents

### 1. Laboratory equipment

| The name of the                          | manufacturer                         | model            |
|------------------------------------------|--------------------------------------|------------------|
| High speed cryogenic tissue grinder      | Servicebio                           | KZ-III-F         |
| Taiwan high speed freezer centrifuge     | Hettichi, Germany                    | The 0004219-11   |
| Fluorescence quantitative PCR instrument | bole                                 | CFX connect      |
| Ultra clean workbench                    | Suzhou purification                  | SW-CJ-1FD        |
| Ultramicro spectrophotometer             | Thermo Fisher                        | M mu Ltiskan sky |
| Pipetting gun                            | Eppendorf Research <sup>®</sup> plus | 3120000348       |
| Pure water meter                         | leacom                               | SMART-N          |
| TIP # head                               | Shandong Baroque                     | 20-1000.         |

### 2. Experimental reagents

| reagent | manufacturer | number |
|---------|--------------|--------|
|---------|--------------|--------|

---

|                                                   |                                        |          |
|---------------------------------------------------|----------------------------------------|----------|
| Ultrapure RNA extraction kit                      | Kangwei Century                        | CW0581M  |
| Trichloromethane                                  | Sinopharm Group Chemical Reagent<br>Co | 10006818 |
| TRIzon Reagent                                    | Kangwei Century                        | CW0580S  |
| Isopropyl alcohol                                 | Sinopharm Group Chemical Reagent<br>Co | 80109218 |
| Absolute ethanol                                  | Sinopharm Group Chemical Reagent<br>Co | 10009218 |
| SYBR Green Pro Taq HS Premixed qPCR Kit           | Akoray Bio                             | AG11701  |
| Evo M-MLV reverse transcription reagent<br>premix | Akora Bio                              | AG11706  |
| primer                                            | Beijing Dingguo Bio                    |          |

---

The centrifuge tube and TIP head should be sterilized with damp heat for 20min and dried.

### III. Experimental steps of fluorescence quantitative PCR

#### 1. Total RNA extraction (the tip and centrifuge tube are sterilized by damp heat, without RNA enzyme)

(1) Animal tissues: Take fresh or -70°C frozen animal tissues and cut them into pieces as far as possible, add 1 ml Trizol Reagent every 30-50mg of tissue, and homogenize with a homogenizer. Or after grinding in liquid nitrogen, add 1ml TRIzol Reagent and mix.

Note: The sample volume should generally not exceed 20% of the volume of TRIzol Reagent.

(2) Suck TRIzol Reagent into a 2mL centrifuge tube, suck and mix well, and let stand for 5min.

(3) Add 200 µL chloroform per 1ml TRIzol Reagent, shake violently for 45 seconds to make it fully mixed, the liquid is emulsion, and let stand for 3min at room temperature.

(4) Centrifugation at 12000rpm for 10min at 4 ° C.

---

- 
- (5) Transfer the supernatant to a new centrifuge tube, add an equal volume of 70% ethanol, and mix upside down.
- (6) Add all the solution obtained in the previous step to the adsorption column that has been loaded into the collection tube. If it can not be added at one time, it can be transferred several times. Centrifuge at 12000rpm for 20 seconds, pour out the waste liquid in the collection tube, and put the adsorption column back into the collection tube.
- (7) Add 700 $\mu$ L Buffer RW1 to the adsorption column, centrifuge at 12000rpm for 20 seconds, pour out the waste liquid in the collection tube, and put the adsorption column back into the collection tube.
- (8) Add 500 $\mu$ L Buffer RW2 to the adsorption column (check whether absolute ethanol has been added before use), centrifuge at 12000rpm for 20 seconds, pour out the waste liquid in the collection tube, and put the adsorption column back into the collection tube.
- (9) Repeat step 8.
- (10) Centrifuge at 12000rpm for 2min and pour out the waste liquid in the collection tube. Place the adsorption column at room temperature for a few minutes and allow to dry thoroughly.

Note: The purpose of this step is to remove the residual ethanol from the adsorption column, which will affect the subsequent enzymatic reaction.

- (11) Put the adsorption column in a new RNase-Free centrifuge tube, add 30-50 $\mu$ L rnase-free Water to the middle part of the adsorption column, place at room temperature for 1min, centrifuge at 12000 RPM for 1min, collect the RNA solution, and store the RNA at -70°C to prevent degradation.

## 2. Reverse transcription (the tip and PCR are sterilized by damp heat without ribonuclease)

Prepare the reverse transcription reaction solution (the reaction solution is prepared on ice)

---

| Ingredient names            | Amount added |
|-----------------------------|--------------|
| 5 X Evo M-MLV RT Master Mix | 2 $\mu$ L    |

---

---



---

|                  |            |
|------------------|------------|
| Total RNA        | -          |
| RNase free water | Up to 10μL |

---

Reaction conditions: 37 ° C for 15min

85 °C for 5 SEC

4 °C

\*1: RNA amount can be added as needed. In a 10μL reverse transcription system, a maximum of 500ng Total RNA is recommended when using the SYBR Green QPCR method; When using the probe method, a maximum of 1ug of Total RNA is recommended.

\*2: Be careful to mix gently during the preparation of RT reaction solution.

### 3. Quantitative PCR

1) The cDNA obtained by the above reverse transcription process can be directly analyzed by quantitative PCR. Using our SYBR® Green Premix Pro Taq HS qPCR Kit (Code. AG11701) as an example, the detailed operation is as follows:

(Take ABI 7500 Real-Time PCR System as an example)

---

| Component names                                   | 20μL system | 50μL system |
|---------------------------------------------------|-------------|-------------|
| 2X SYBR® Green Pro Taq HS Premix 10μl 25μl cDNA*1 | 2 μL        | 5 μL        |
| Template*1                                        | < 100 ng    | < 200 ng    |
| Primer F (10μM) *2                                | 0.4 μL      | 1 μL        |
| Primer R (10μM) *2                                | 0.4 μL      | 1 μL        |
| ROX Reference Dye (4μM) *3,4                      | 0.4 μL      | 1 μL        |
| RNase free water                                  | Up to 20μL  | Up to 50μL  |

---

#### 2) qPCR reaction conditions

Two-step PCR reaction procedure \*1:

---

|        | The temperature | time     | Number of cycles |
|--------|-----------------|----------|------------------|
| Step 1 | 95 °C           | 30 sec*2 | 1                |

---



---

|        |                    |          |   |    |
|--------|--------------------|----------|---|----|
|        |                    |          |   |    |
| Step 2 | 95 °C              | 5 sec    | } | 40 |
|        | 60 °C              | 30 sec*3 |   |    |
| Step 3 | Dissociation stage |          |   |    |

#### 4. Process the results

$\Delta\Delta CT$  method:

$A = CT(\text{target gene, test sample}) - CT(\text{internal standard gene, test sample})$

$B = CT(\text{target gene, control sample}) - CT(\text{internal standard gene, control sample})$

$K = A - B$

Expression fold  $= 2^{-K}$

#### Iv. Experimental results

See Data analysis form for details of raw data and data analysis.
