# Supplementary material for: Identifying C1QB, ITGAM, and ITGB2 as potential diagnostic candidate genes for diabetic nephropathy using bioinformatics analysis
Source: PeerJ. 2023 May 25;11:e15437. doi: 10.7717/peerj.15437 (PMC10225123; doi:10.7717/peerj.15437)
Supplement: Supplemental Information 1 — The results of biochemical measurements on rat models. [file peerj-11-15437-s001.xlsx]

## Sheet: basic information
Biochemical report of Shandong Helix Biotechnology Co., LTD
Name: Jiang Wei	Sample size：6
Test item:ALB，BUN，CR	Sample type：serum
Treatment of specimens：
I : 3000-4000r, 10min, supernatant was taken and placed in the refrigerator at 4℃ for testing.
II : Supernatant was collected and placed in refrigerator at 4℃ for testing
III: Weigh the appropriate amount of tissue, grind with 9 times normal saline, then centrifuge the grinding liquid 3000-4000r for 10min, take the supernatant, put it in the refrigerator at 4℃, to be tested.
Instrument and consumable information
name	manufacturers	Model Number (item number)
multi-deck refrigerated display cabinet	XINGX	LSC-316C
Horizontal freezer	MELING	BCD-318AT
electronic scales	METTLER TOLEDO	ME203E/02
High speed tissue grinder	Servicebio	KZ-II
Table top high speed refrigerated centrifuge	DLAB Scientific	D3024R
Laboratory ultrapure water machine	ELKAY	AK-RO-C2
turbine mixer	Servicebio	MX-F
fully automatic biochemical analyser	Rayto	Chemray 800
1.5ml centrifugal tube	Servicebio	EP-150-M
1000ul pipette	DLAB Scientific	KE0037273
200ul pipette	DLAB Scientific	YE3K030591
50ul pipettor	DLAB Scientific	DS35110
10ul pipette	DLAB Scientific	KE0012951
Kit Information
name	Model Number (item number)	batch number	manufacturers
Albumin determination kit	S03043	20220322	Rayto
Urea determination kit	S03036	20220324	Rayto
Creatinine determination kit	S03076	20220119	Rayto

## Sheet: group
group
1	control
2	DN（diabetic nephropathy）

## Sheet: ALB
albumin（g/L)	group
38.33	1
27.13	1
27.84	1
20.32	2
21.87	2
27.16	2
Unpaired t test
P value	0.1282
P value summary	ns
Significantly different (P < 0.05)?	No
One- or two-tailed P value?	Two-tailed
t, df	t=1.914, df=4
How big is the difference?
Mean of column A	31.1
Mean of column B	23.12
Difference between means (B - A) ± SEM	-7.983 ± 4.171
95% confidence interval	-19.56 to 3.597
R squared (eta squared)	0.478

## Sheet: CREA
creatinine（umol/L)	group
13.82	1
12.22	1
13.04	1
20.45	2
25.29	2
26.11	2
Unpaired t test
P value	0.0039
P value summary	**
Significantly different (P < 0.05)?	Yes
One- or two-tailed P value?	Two-tailed
t, df	t=5.984, df=4
How big is the difference?
Mean of column A	13.03
Mean of column B	23.95
Difference between means (B - A) ± SEM	10.92 ± 1.825
95% confidence interval	5.855 to 15.99
R squared (eta squared)	0.8995

## Sheet: BUN
BUN（mmol/L)	group
2.21	1
2.14	1
2.1	1
3.06	2
4.95	2
5.07	2
Unpaired t test
P value	0.0275
P value summary	*
Significantly different (P < 0.05)?	Yes
One- or two-tailed P value?	Two-tailed
t, df	t=3.391, df=4
How big is the difference?
Mean of column A	2.15
Mean of column B	4.36
Difference between means (B - A) ± SEM	2.210 ± 0.6517
95% confidence interval	0.4005 to 4.019
R squared (eta squared)	0.7419

## Sheet: ratio
group	urinary protein/creatinine ratio(mg/g)
1	4529.85
1	4680.35
1	4563.02
1	4577.18					Unpaired t test
1	4504.18					P value	<0.0001
1	4533.36					P value summary	****
1	4423.18					Significantly different (P < 0.05)?	Yes
1	4596.74					One- or two-tailed P value?	Two-tailed
1	4638.2					t, df	t=17.23, df=16
2	5305.02
2	5176.05					How big is the difference?
2	5179.68					Mean of column A	4561
2	5232.99					Mean of column B	5236
2	5236.65					Difference between means (B - A) ± SEM	675.6 ± 39.21
2	5371.98					95% confidence interval	592.5 to 758.7
2	5070.93					R squared (eta squared)	0.9489
2	5323.64
2	5229.32
