# Supplementary material for: Identifying C1QB, ITGAM, and ITGB2 as potential diagnostic candidate genes for diabetic nephropathy using bioinformatics analysis
Source: PeerJ. 2023 May 25;11:e15437. doi: 10.7717/peerj.15437 (PMC10225123; doi:10.7717/peerj.15437)
Supplement: Supplemental Information 2 [file peerj-11-15437-s002.xls]

## Sheet: GSE30122_series_matrix
#CLASS	GENE	DN	DN	DN	DN	DN	DN	DN	DN	DN	NC	NC	NC	NC	NC	NC	NC	NC	NC	NC	NC	NC	NC	DN	DN	DN	DN	DN	DN	DN	DN	DN	DN	NC	NC	NC	NC	NC	NC	NC	NC	NC	NC	NC	NC	NC	NC	NC	NC
#sample	gene	GSM756992	GSM756993	GSM756994	GSM756995	GSM756996	GSM756997	GSM756998	GSM756999	GSM757000	GSM757001	GSM757002	GSM757003	GSM757004	GSM757005	GSM757006	GSM757007	GSM757008	GSM757009	GSM757010	GSM757011	GSM757012	GSM757013	GSM757014	GSM757015	GSM757016	GSM757017	GSM757018	GSM757019	GSM757020	GSM757021	GSM757022	GSM757023	GSM757024	GSM757025	GSM757026	GSM757027	GSM757028	GSM757029	GSM757030	GSM757031	GSM757032	GSM757033	GSM757034	GSM757035	GSM758485	GSM758486	GSM758487	GSM758488
1053_at	RFC2	0.0832481	0.107157	-0.348924	0.157925	0.081892	-0.168304	0.623774	0.354593	0.285836	-0.346336	-0.15034	0.170526	-0.28473	-0.0954909	-0.00158453	-0.0161772	-0.34299	0.0460572	-0.116223	0.219529	0.00158453	-0.0908074	0.236349	0.119733	0.0818715	0.505905	0.557108	0.445695	0.0206804	0.368912	-0.280901	-0.0262918	0.388839	-0.201556	-0.204894	-0.273985	-0.143702	-0.0651999	0.0560031	-0.0206804	0.3242	-0.0379381	-0.330404	-0.0629249	-0.272401	-0.0527906	0.175521	-0.244468
117_at	HSPA6	-0.000487	0.451607	0.341002	-0.108174	0.236517	-0.0861096	-0.157492	0.0465026	-0.172722	-0.322721	-0.119131	-0.0508623	0.0165997	-0.0212474	0.103401	0.000487	-0.0754452	0.0458274	-0.398772	0.119691	0.126921	0.135416	-0.155251	0.173947	-0.0333056	-0.0589395	-0.103658	-0.391593	-0.207297	-0.182498	0.0333056	0.0700011	0.0942121	0.434981	0.0418296	0.547018	-0.243624	0.104335	0.0702186	0.242287	-0.0425386	-0.0664549	0.289591	-0.177835	-0.397507	-0.230071	-0.0353565	-0.018599
121_at	PAX8	0.287857	0.323984	0.0514078	-0.495761	0.535665	0.996058	-0.0481453	-0.00261593	0.328823	0.00261593	0.461096	-0.390205	-0.474433	-0.401441	-0.428623	-0.384923	-0.698934	0.486111	-0.252867	-0.360149	0.0407114	0.117259	0.0905676	0.440096	0.225213	-0.315482	-0.208008	-0.0350122	0.0350122	-0.382234	0.529364	0.0763845	-0.742138	-0.290631	0.113528	-0.581059	-0.104211	0.10004	-0.045023	0.127093	-0.200264	0.615591	0.26256	-0.259607	-0.0891247	0.376804	-0.57148	-0.636072
1255_g_at	GUCA1A	0.00760746	0.211025	0.47989	0.53503	-0.0506239	-0.0036037	-0.0588098	-0.130043	-0.0680106	0.0901914	-0.0337608	0.0202496	0.0387564	-0.18916	-0.0408871	-0.101343	0.0255904	-0.0793691	0.0401115	0.0036037	0.0196033	-0.134742	0.0100987	-0.279639	-0.221435	0.0972967	0.196349	-0.146091	-0.179054	0.0299165	-0.0100987	-0.140041	0.321712	0.124752	-0.0702102	0.350707	0.228684	-0.110322	-0.205647	-0.157106	0.131065	0.0579274	0.250332	-0.0676205	0.0612621	-0.0385239	-0.00334287	-0.0229058
1316_at	THRA	0.0246682	0.460003	0.350631	-0.110784	-0.239639	0.0382171	-0.370837	-0.161808	0.309169	-0.0246682	0.765365	0.10676	0.411123	0.274038	0.193538	0.0269332	-0.348479	-0.133905	-0.239748	-0.238725	-0.327108	-0.383224	-0.247418	0.0181718	-0.538636	-0.359284	-0.113217	-0.371768	-0.288343	-0.534824	0.0627179	-0.562131	-0.0181718	0.296373	0.972024	0.422305	0.0797439	0.0626597	0.448702	-0.126822	0.229161	0.0916367	0.389339	-0.189566	0.0215068	0.443492	0	0.245337
1320_at	PTPN21	-0.119884	0.0925937	0.377886	0.0429397	-0.182069	-0.11779	0.0478826	-0.0733342	0.0286555	-0.139664	0.0794864	0.108463	0.287404	-0.254199	0.0298915	-0.065949	-0.196699	0.0701842	0.16847	-0.0314193	-0.0972128	-0.0286555	-0.0687375	0.0690293	-0.19725	0.477878	0.0591888	-0.139506	-0.149893	0.00246763	-0.229039	-0.207627	-0.058392	0.485013	0.0113144	0.590702	0.122868	-0.105792	0.0651379	-0.0356493	-0.00246763	0.0567112	0.452045	-0.2044	-0.22076	0.0197501	0.0288682	0.191236
1405_i_at	CCL5	2.44927	0.0502834	2.68665	2.15418	0.0685959	-0.829122	2.00631	1.73736	1.45908	-0.218779	0.200414	-0.599147	-0.793108	-0.47269	-0.564711	-0.841851	-0.677298	0.127278	2.00869	-0.0502834	-0.0871859	-0.439838	-0.226266	1.29941	1.10952	5.39275	3.87653	0.38667	0.431926	2.10745	-0.0245938	1.45362	-0.392651	-0.319229	-0.471525	0.183907	-0.330544	-0.179418	-0.198319	-0.203239	-0.175033	0.0245938	0.124023	-0.188434	0.117276	1.03755	0	-0.0605888
1431_at	CYP2E1	-0.118797	0.202797	0.0881886	0.178519	0.0685945	0.180981	-0.0115311	-0.0632398	-0.0401588	-0.0176649	0.102764	-0.0621917	-0.107579	-0.0993578	0.0596342	-0.0155473	0.0155139	-0.184381	-0.0639701	0.131509	0.0927863	0.0115314	-0.140181	-0.23208	-0.19558	0.00446272	0.127818	-0.123883	-0.191277	-0.035429	-0.0329931	0.00825596	0.117027	0.0878935	0.781475	0.373725	0.151602	-0.142415	0.306196	0.0350103	-0.139934	-0.00446248	0.0988655	-0.153497	-0.0941513	0.00232696	-0.169464	-0.209611
1438_at	EPHB3	-0.075511	0.524993	0.29252	0.220228	0.113046	0.149589	-0.209284	-0.298374	0.022778	0.034358	-0.189575	0.0596094	0.000132	-0.000132	-0.0199432	-0.0362105	-0.0668926	0.115711	-0.347163	-0.0291576	0.040082	-0.0946083	-0.275795	-0.0968714	-0.326048	0.301681	-0.0157161	-0.450801	-0.242105	-0.0121365	0.132555	-0.35532	0.127896	0.728754	0.215289	0.812443	0.314807	-0.0830474	0.206695	0.0121365	0.200102	-0.159778	0.345707	-0.0783982	-0.0652838	-0.113584	0.0323439	-0.193295
1487_at	ESRRA	0.270753	0.169575	-0.673592	-0.56951	0.496876	0.760745	0.532029	0.467135	0.548029	0.0963135	0.158977	-0.428797	-0.309671	-0.498971	-0.355556	-0.209409	-0.839107	-0.0267935	-0.1321	-0.0130758	0.0275621	0.0130758	0.166648	-0.077548	-0.287401	-0.848171	-0.932416	0.577524	0.727199	-0.0756826	-0.338914	-0.589808	-0.125835	0.0373068	0.665622	0.223394	0.111169	-0.116536	0.0024538	-0.13281	-0.0024538	0.246787	1.11354	0.940878	0.0584478	0.154309	-0.549957	-0.33951
1494_f_at	CYP2A6	-0.0106363	0.674665	0.22121	0.496228	0.41209	0.333936	-0.164773	-0.408564	0.0166831	-0.0513401	-0.18026	0.0438991	0.162258	0.168936	-0.130937	0.0106363	-0.424207	-0.0242362	-0.396841	-0.115973	-0.138618	0.0299687	-0.261545	0.0328765	-0.0803871	0.247429	0.00929069	-0.285645	-0.4085	-0.00929022	0.100379	-0.406216	-0.104558	0.119254	-0.0354519	0.83005	0.292626	0.125069	0.132767	0.0763378	-0.0937648	-0.0349903	0.587191	-0.119076	-0.0632143	-0.138478	0	0.192338
1598_g_at	GAS6	-0.338379	-0.808745	-0.040822	-0.0937586	-0.928956	-0.0448065	-0.687687	-0.755475	0.541374	0.599319	0.592634	0.070159	0.828027	1.22708	0.837416	0.87674	-1.67508	0.564167	1.72879	0.040822	-0.52153	-0.302294	-0.631161	0.318883	-0.0509882	1.52796	1.54349	-0.470549	-0.350991	0.662867	-1.20294	-1.00493	0.0144272	0.36028	-0.121127	-0.358253	-0.071065	0.0495062	-0.0117512	0.0117512	-0.15773	1.47845	0.559782	0.180441	0.906332	0.880934	0.402482	1.18687
160020_at	MMP14	-0.0417147	0.828096	0.732236	0.802395	0.00716686	0.210401	-0.427108	-0.368395	0.155395	-0.21248	-0.0413184	0.0910258	0.106326	0.0250878	0.19881	-0.0160565	-0.415202	0.0295773	-0.299559	-0.0706229	-0.00716686	-0.22483	-0.374329	0.162602	-0.217308	0.235888	0.31083	-0.447066	-0.356519	-0.327595	-0.0587587	-0.483215	0.201503	0.533949	-0.0413928	0.489953	0.113295	-0.281786	0.0415587	0.0413923	-0.147732	0.121225	0.495761	-0.159122	-0.30104	-0.0947208	0.0214324	0.118032
1729_at	TRADD	0.544182	-0.010848	0.374787	0.329537	0.427079	0.447375	-0.0978546	-0.0559225	0.37575	-0.281937	0.247689	-0.423293	-0.130289	-0.295712	-0.275249	-0.309097	-0.896441	0.291152	0.0244617	0.566806	-0.0226603	0.010848	-0.0794783	0.566016	-0.137052	0.932192	0.293263	-0.14331	0.0409651	0.112973	-0.69044	-0.92964	0.303496	0.0814018	0.754084	-0.141113	0.00127315	-0.277611	-0.00127315	-0.210387	-0.382503	-0.417901	0.522085	0.238402	-0.241018	0.255814	-0.286058	-0.0684519
177_at	PLD1	0.0821528	0.0248957	-0.200234	0.0216017	0.314834	0.338682	0.310494	0.76294	-0.0337377	0.0916352	-0.0492373	-0.205497	-0.0216022	-0.247619	-0.08041	-0.209731	0.330766	-0.12694	-0.18193	0.0640664	0.102167	-0.182739	0.152374	-0.0732036	0.071908	-0.44538	-0.898311	0.151526	0.513569	-0.526278	-0.291867	-0.273126	0.15735	-0.446109	0.565208	-0.274356	0.268504	0.315698	-0.00879526	0.41444	0.00879526	-0.758971	-0.128356	0.23573	0.0159812	0	-0.28696	-0.0617414
179_at	DTX2P1-UPK3BP1-PMS2P11	-0.25405	0.456442	0.506944	0.481158	0.120937	0.391671	-0.152918	-0.388756	0.244867	-0.291128	0.0556917	-0.174755	-0.00602913	-0.0914812	-0.0279922	0.00602913	-0.54561	0.0955362	-0.0637898	0.138115	0.00790501	-0.102362	0.0299883	-0.289842	-0.192571	0.516939	0.425449	-0.319395	-0.213429	-0.283422	0.00850201	-0.713418	-0.0799274	0.157679	0.129904	0.619594	0.377886	-0.423922	-0.00850201	-0.0987177	-0.246761	0.215459	0.470817	0.203683	-0.329991	0.0290661	-0.17064	-0.0192022
1861_at	BAD	-0.228747	-1.12313	-1.17493	0.015089	0.775838	0.281033	-0.174512	-0.0150895	0.978873	0.236318	-0.297792	0.0257206	-0.578506	-0.0391798	-0.808275	-0.57801	-1.3451	0.797611	0.575559	1.4851	0.340122	0.467089	0.605852	0.00728226	-0.0183606	1.15121	-0.00728273	0.125676	0.199508	1.78047	-0.537105	-0.770256	0.806324	-0.727956	0.347605	-0.721391	0.374602	0.221291	-0.213617	-0.248134	-0.492551	-0.334849	-0.363559	0.861937	0.420803	-0.0459633	0.254304	-0.100777
200000_s_at	PRPF8	0.221375	-1.58026	-1.51638	-0.662171	-0.110698	0.44661	0.29102	-0.392761	-0.095664	0.117578	0.128407	-0.0337248	-0.10871	-0.135728	0.100076	-0.0344782	-0.918853	0.326911	0.572099	0.211564	0.118982	0.0337248	-0.186128	-0.0823936	-0.1699	0.157236	0.681813	0.0823936	0.25574	0.0931883	-0.968612	-0.965274	-0.715012	-0.480082	0.364504	-1.45893	-0.658756	-0.122187	0.203168	0.23278	0.103663	0.398312	-0.662186	0.448581	0.228857	0.30397	0.0611267	0
200001_at	CAPNS1	-0.11137	-2.77857	-2.25458	-0.361451	0.679938	0.146577	0.00594234	0.132183	0.392684	-0.262342	-0.36599	-0.00594234	0.0391054	-0.352581	-0.0701609	-0.744745	-1.91709	0.832038	0.943111	1.00761	0.784804	0.584875	0.447804	-0.274202	0.502459	0.214837	0.151988	0.756008	-0.0278292	0.500495	-1.31613	-1.42054	0.519884	-2.19605	-0.88411	-2.23147	-0.142457	-0.738661	0.383776	0.157982	0.0278292	-0.414907	-0.637826	0.694377	0.00487328	-0.366155	0.0438643	0.173343
200002_at	RPL35	0.88818	-0.054843	0.504142	1.30184	0.600705	-0.213055	-0.978909	-0.891045	1.27335	0.440551	0.833986	-0.932338	-0.842897	-1.31956	-1.32977	-1.15109	-1.44303	0.514485	0.46914	1.0047	-0.271166	0.054843	0.138119	0.767065	0.326644	1.90111	0.0847044	-1.13888	-1.09261	1.10344	-0.706203	-0.384916	0.874624	0.389271	1.05616	-1.59105	-0.391623	-1.29844	-0.894878	-1.91346	-1.66203	0.0171938	-0.0171938	0.705347	0.747438	1.19784	-0.658331	-0.560593
200004_at	EIF4G2	-0.0756912	-0.745311	-0.724318	-0.0810728	-0.236763	0.49893	0.775408	0.898937	-0.251776	-0.022933	0.0641165	0.133151	0.0281534	0.0464296	0.160686	0.143875	0.316771	-0.275296	0.022933	-0.136546	-0.323269	-0.413945	0.278133	-0.106617	0.107793	-0.309797	0.218813	0.583097	0.346161	-0.900417	0.136596	0.364566	0.195787	-0.489629	-0.0869265	-2.44224	-0.406428	0.178413	0.145703	-0.00192928	0.00192928	-0.0296869	-1.48605	-0.177649	-0.0613537	0.0476198	0.124555	0.017498
200005_at	EIF3D	0.250571	-2.78752	-1.23669	0.152639	-0.00997543	0.604887	1.11139	1.20075	0.488842	0.00997543	0.186351	-0.456806	-0.542582	-0.2159	-0.319667	-0.436011	-0.257302	0.415826	0.538515	0.165353	-0.0637293	-0.54072	0.235401	0.918722	0.47179	0.249723	1.12958	0.96832	0.959186	0.375076	-1.20548	-0.0248508	0.16448	-0.840557	0.0248508	-2.52003	-0.87838	-0.575674	-0.410093	-0.407701	-0.559427	-0.129861	-0.620563	0.451632	0.319716	0.579298	-0.225423	-0.208234
200006_at	PARK7	-0.0078907	-0.0170145	-0.14176	-0.217736	-0.195908	-0.0059576	-0.259965	-0.148248	0.135427	0.261703	0.365017	-0.168702	-0.157624	0.0258369	-0.241236	0.0854139	0.00912285	0.106743	0.00595856	0.309764	0.283418	0.19708	0.611358	0.187924	0.623423	-0.105333	-0.564299	-0.376696	-0.216252	-0.57994	0.0120449	0.190155	0.262749	-0.0641708	0.311598	-1.64269	0.0313635	-0.0827789	-0.21975	-0.0120449	0.134205	0.018158	-1.06297	0.521311	0.172648	0.321607	-0.1775	-0.321466
200007_at	SRP14	-0.270672	-0.127351	0.00751591	-0.00751686	0.0939465	0.140279	0.199663	0.36534	0.567466	-0.09935	0.127319	-0.0642166	-0.0456095	-0.188759	-0.211694	-0.00815487	-0.150105	0.361051	0.301106	0.440039	0.139583	-0.0605335	-0.0768833	0.00363064	-0.00362968	0.292863	0.0958195	0.345126	0.356209	-0.0475912	-0.749613	0.199242	0.341297	-0.2807	0.052475	-1.44626	-0.0194941	-0.123545	-0.02005	-0.157079	-0.283567	0.577485	0.0562897	0.833949	-0.0391941	0.237898	0	0
200008_s_at	GDI2	0.0952249	-0.966687	-0.288097	0.340997	0.424895	0.10532	2.16676	2.07016	0.466603	-0.4597	-0.647564	-0.145866	-0.0952249	-0.223752	-0.316192	-0.47934	-0.348314	0.237982	0.698333	-0.201484	0.412833	0.409958	1.69726	-0.631485	0.856208	-0.0188541	-0.00613737	1.48843	1.08098	0.00613689	-0.129741	1.28569	0.0532179	-0.82453	-0.796531	-0.962467	-0.452034	-0.077868	0.11378	0.1733	0.257307	-0.990817	-0.663502	0.599739	-0.286814	-0.368364	-0.060082	0.070107
200009_at	GDI2	0.36393	0.200875	0.443881	0.460017	0.0626698	0.672273	0.832763	0.712926	-0.00218487	-0.0749502	-0.122777	-0.248904	-0.100282	-0.0111246	-0.0764704	0.000454	0.350786	-0.110154	-0.256526	-0.0329466	-0.000454	0.0725574	-0.00234985	0.00235081	0.429684	0.00452519	0.52798	0.298603	0.274381	-0.505665	0.164465	0.472675	0.230654	0.0831661	-0.0603333	-2.05657	-0.363694	-0.192162	-0.392162	-0.375873	-0.480754	-0.209271	-0.3808	0.0879135	-0.025033	-0.137289	-0.174941	-0.0514946
200010_at	RPL11	0.532864	-0.478605	-0.806204	0.0871573	0.244905	0.284255	0.0896387	0.366339	1.13924	-0.138743	0.414756	-1.1519	-1.19146	-1.55182	-1.1278	-1.21322	-1.52345	0.0669699	0.256901	0.768487	-0.373633	-0.0669699	0.0366173	1.14845	-0.872516	0.670444	1.62352	0.0946684	0.133019	1.04316	-0.805743	-0.0366173	0.786532	-0.579946	0.48762	-2.12669	-1.07103	-0.87036	-0.722706	-1.04286	-0.76311	1.7517	-0.533361	1.16134	0.679683	1.27533	-0.338141	-0.208772
200011_s_at	ARF3	-0.519327	-1.10937	-0.575523	-0.249065	-0.600626	0.367403	0.161055	-0.375827	-0.669429	0.130682	0.242459	0.0721998	0.192695	0.339123	0.0595045	0.349652	-0.37616	-0.39367	0.074419	0.0657568	-0.0595045	-0.188968	0.199844	-0.0934954	0.677313	-0.3798	0.205691	0.580788	0.272845	-1.0053	0.221491	-0.01828	-0.533618	-0.975532	-0.184795	-1.27068	0.187191	0.0646105	0.01828	0.251123	0.138004	-1.27969	-1.0768	-0.201951	0.0413761	0.286321	0.14043	0.260582
200013_at	RPL24	0.309153	-0.194137	-0.0246897	0.263408	0.609546	0.0755749	0.0147419	0.38277	0.145198	-0.0420103	0.243318	-0.521765	-0.0147419	-0.673109	-0.398035	-0.374765	-1.52485	0.545466	0.159884	0.563315	-0.321116	-0.0203266	0.278035	0.635046	-0.55361	0.687327	0.969028	-0.147114	-0.0689545	-0.288886	0.15847	0.775648	0.806569	0.0689545	0.331939	-1.45036	-0.340868	-0.776699	-0.541277	-0.723669	-0.959704	0.926742	-0.112349	0.293426	0.218896	0.337056	-0.186402	0
200014_s_at	HNRNPC	-0.205113	-0.0864935	-0.515006	-0.195938	-0.453979	-0.141401	-0.0211802	-0.313095	-0.68772	-0.163055	0.0778151	0.0683393	-0.010993	0.0294228	0.010993	0.115983	0.345795	0.0119038	0.175525	0.0842562	0.0116339	0.0649462	0.400631	0.203353	0.390099	0.19721	-0.0423727	0.023921	-0.0201626	-0.744546	0.547874	0.931241	0.0201626	0.0256662	0.0319061	-1.96451	-0.568974	-0.0736256	-0.20135	-0.199901	-0.169439	0.0451641	-1.93878	-0.241958	-0.0992222	0.22771	0.1857	0.111164
200015_s_at	SEPT2	-0.335709	-0.46072	-0.530406	-0.729066	-0.35084	-0.261534	0.0408564	-0.0637741	-0.0937758	0.14943	-0.0680037	0.306818	0.177917	0.200497	0.0717134	0.500268	0.493113	-0.0408554	0.0569897	-0.18787	0.166858	0.292213	-0.192012	-0.036458	0.635844	-0.213165	-0.258406	0.393953	0.214663	-0.481808	0.432185	0.46519	-0.314462	-0.125638	0.0364571	-1.54754	-0.0763187	0.246606	0.267312	0.217036	0.259509	-0.630989	-1.06016	0.168033	0.159947	-0.0552387	0.302075	0.174162
200017_at	RPS27A	-0.0643415	0.185958	-0.00120163	0.140955	0.313554	-0.330207	-0.333781	-0.0954933	0.223372	-0.115778	0.255846	-0.252475	-0.160979	-0.181888	-0.0193996	0.092391	-0.258423	0.350459	0.273253	0.397802	0.00120163	0.209593	-0.0391912	0.349476	-0.326152	0.0190973	0.412516	-0.350381	-0.252064	0.000586	-0.698847	-0.0776529	0.447187	0.0268908	0.345271	-2.06187	-0.220654	-0.000586	-0.0143433	0.0346231	0.036294	0.478507	-0.16291	0.559646	-0.110993	0.445222	-0.234993	-0.114427
200019_s_at	FAU	0.573515	0.47306	0.40606	0.683882	0.420049	-0.0593119	-0.679831	-0.463314	1.20888	0.0593119	0.259353	-0.388458	-0.439236	-0.7116	-0.536652	-0.267854	-0.721995	0.337794	-0.0686064	0.62808	-0.0797234	0.167098	-0.130903	0.426391	0.0446148	0.883451	0.407354	-0.863069	-0.593426	0.569933	-0.448099	-0.0446148	0.651012	0.583773	0.416409	-0.996839	-0.406122	-0.39448	-0.592962	-0.594418	-0.675695	0.240971	0.357788	0.423025	0.155412	0.383285	-0.254431	-0.307089
200020_at	TARDBP	-0.141346	-1.45044	-0.303359	-0.655425	-0.699986	0.907944	0.760098	0.552526	-0.763369	0.0348577	-0.165264	0.113281	0.0522537	0.259984	0.174335	0.0840998	0.931232	-0.0529795	0.204842	-0.198438	-0.0348577	-0.30106	0.363815	-0.280695	0.576122	-0.840069	0.801594	0.747141	0.566896	-0.680319	0.536583	0.286459	-0.300232	0.00598335	-0.489096	-1.70377	-0.199015	-0.00598335	-0.171837	0.193707	0.196352	-0.473448	-0.58683	0.0304813	0	-0.203856	0.131555	0.0684938
200021_at	CFL1	0.0730944	-0.190783	-0.0177746	0.0470438	0.207963	0.00385189	-0.485275	-0.701469	-0.196511	0.0681858	0.318394	0.089015	-0.0669737	-0.00385189	-0.0246725	0.0797701	-0.552499	-0.30609	-0.355727	0.202502	0.0247583	0.159506	-0.160119	0.123389	0.518516	0.0925121	0.00634861	-0.159294	-0.207691	-1.3132	0.0384665	-0.792965	-0.237315	0.151826	0.0532589	-0.8175	-0.168345	0.0203829	-0.0253611	0.0710697	0.0997105	-0.00634766	0.253991	-0.253767	0.109004	0.439015	0.147052	-0.0230351
200022_at	RPL18	0.703218	-0.766099	-0.12954	1.0538	0.58914	0.0574627	-0.477585	-0.17345	1.00682	0.255673	0.376724	-0.919012	-1.05019	-1.15632	-1.00914	-1.1985	-3.4111	1.17674	0.965556	0.97627	0.147932	-0.0574627	0.776673	1.46242	0.61869	2.14994	-0.658817	-0.12341	0.00208569	1.21247	-0.34441	0.806178	1.06262	-0.00208569	1.11669	-1.73603	0.0416498	-0.678787	-0.425987	-1.00443	-0.786514	-0.0221663	-0.300086	1.04423	0.959772	1.15489	-0.305478	-0.27295
200023_s_at	EIF3F	0.220304	-0.487439	-0.405678	0.532231	0.472722	-0.213437	0.557161	0.823179	0.0280933	-0.0280933	-0.0860977	-0.235917	-0.207286	-0.143717	-0.0971737	0.097352	-0.245288	0.403835	0.549259	0.126338	-0.0335674	0.0836248	0.096612	0.595912	0.708047	0.616916	0.527295	0.323956	0.43343	-0.282737	-1.12569	-0.125519	0.111277	-0.114293	0.2893	-1.84399	-0.112636	0.0209455	-0.0270224	-0.0209455	-0.300433	0.0439768	-0.481139	-0.108142	0.0767355	0.0211782	-0.245882	-0.229179
200024_at	RPS5	0.496604	-0.308196	-0.572291	1.01742	0.813778	0.191214	0.275595	0.512297	0.900355	0.109888	-0.176713	-1.30459	-1.22205	-1.43243	-1.30641	-1.21589	-2.56231	0.666634	0.406317	0.3244	-0.109887	-0.245765	0.778091	0.622608	-0.0374107	1.48738	-0.00606632	0.32971	0.36179	1.2811	-0.594708	0.0196953	0.399964	-0.217855	1.04835	-0.96035	-0.132275	-0.943556	-0.614707	-1.31772	-1.29939	0.00606632	-1.13992	1.20511	0.617847	0.456678	-0.696684	-0.694132
200025_s_at	RPL27	0.172756	0.372623	0.340248	0.433783	0.139015	-0.227442	0.0182476	0.216602	0.336512	-0.159877	0.127563	-0.177132	-0.043889	-0.203994	-0.267652	-0.0247192	-0.252586	0.153068	-0.076786	0.0771179	-0.17483	-0.0182476	0.0957127	0.0299397	-0.0826168	0.439905	0.27564	-0.110229	-0.0299387	-0.531918	-0.0807896	0.292781	0.117974	0.0907783	0.0786905	-1.6038	-0.134295	-0.289575	-0.336979	-0.422271	-0.333942	0.331885	0.174995	0.224668	-0.0846195	0.14445	-0.114965	0.000612
200026_at	RPL34	0.616208	0.933483	0.6226	0.579151	0.14487	-0.376453	-0.506969	-0.421338	0.324034	0.0927315	0.0255661	-0.197439	-0.0255661	-0.196392	-0.149774	-0.183446	-0.778872	0.470916	0.0661554	0.139186	-0.304773	-0.18689	0.033637	0.197986	-0.033637	0.799025	-0.194942	-0.79163	-0.90588	0.42315	0.20126	0.325814	0.269171	0.976453	0.460814	-0.786619	-0.0568333	-0.245897	-0.129843	-0.45589	-0.352527	0.284814	0.0500174	-0.243374	0.162815	0.121534	-0.177891	0.0494471
200027_at	NARS	0.208543	-0.0811987	-4.96e-05	-0.145611	0.300958	0.151581	0.566784	0.213339	-0.0162697	0.0888948	0.0966692	-0.064971	-0.00277519	4.86e-05	-0.0711327	0.169518	-0.0206547	-0.249002	-0.602142	-0.219082	0.221633	0.279531	0.352192	-0.29564	0.124427	-0.413799	-0.533645	0.290301	0.0925102	-0.677384	-0.0323105	0.0881519	-0.0720463	-0.759244	-0.0968561	-1.44026	0.270786	0.159298	-0.0583048	0.294654	0.126444	0.0323095	-0.60571	0.32426	-0.0391722	0	-0.210239	-0.122265
200028_s_at	STARD7	-0.00780678	0.346791	-0.321335	-0.438608	-0.614273	0.518693	0.103619	0.0381708	-1.12596	0.182767	-0.0166063	0.225272	0.112948	0.23801	0.00780678	0.0860701	0.160931	-0.124808	-0.0124569	-0.117613	-0.139004	-0.0409832	-0.00186539	-0.178963	0.100961	-0.846629	0.00186539	-0.0375052	0.0182781	-1.21652	-0.0988903	0.229631	0.0537834	0.249912	-0.0329428	-1.50962	0.0751085	0.211288	-0.0182781	0.187124	0.24845	0.409025	-1.03196	-0.242233	0.115862	-0.159371	0.123653	0.0402527
200029_at	RPL19	0.470494	-0.751579	-0.0658197	0.586596	0.310624	0.217717	-0.0152397	0.133221	0.229527	-0.0428305	0.140688	-0.494445	-0.429912	-0.39924	-0.0290432	-0.483048	-0.626733	0.671222	0.401283	0.459062	0.0152388	-0.0358124	-0.0884829	0.876141	-0.0226154	0.992007	0.654305	0.0267725	0.275786	0.497447	-0.885247	-0.456259	0.679724	-0.238665	0.660033	-1.39751	-0.615568	-0.0479183	0.0226154	-0.618051	-0.280849	0.42086	-0.37012	0.489869	0.175882	0.288401	-0.20461	-0.133841
200030_s_at	SLC25A3	-0.0853739	-1.14667	-1.76728	-0.565751	-0.0083704	0.195879	0.360296	0.143353	-0.602451	-0.0632696	-0.263469	0.00309467	0.0814848	0.105389	0.121806	0.161975	-0.00309467	-0.0151987	0.0784025	-0.0274019	0.110839	0.128415	0.136566	-0.142338	0.577795	-1.01585	-0.113579	0.356647	0.441482	-1.21411	-0.191549	0.0430899	-0.115293	-0.329797	-0.0430899	-2.23967	0.0464344	0.43367	0.476931	0.616898	0.500752	-0.38454	-0.752861	0.259942	-0.120869	-0.336277	-0.026865	0.0134354
200032_s_at	RPL9	0.00649262	0.0737438	-0.00159741	0.234537	0.0238419	0.0538778	0.0277815	0.29997	-0.0991459	0.0412226	0.177242	-0.0563192	-0.0382948	0.000426	-0.0621004	0.0521488	-0.137021	-0.000426	-0.183563	-0.09021	-0.137623	-0.0526285	-0.00707626	0.074605	0.0406151	0.170201	0.392216	-0.09657	-0.0434084	-0.961488	-0.409287	0.240839	0.357615	-0.0103674	0.135381	-2.50163	-0.28517	0.0345879	-0.031848	-0.0112066	0.0505915	0.192981	-0.814186	0.00707722	0	0.15433	-0.0598421	-0.0375881
200034_s_at	RPL6	0.162224	-0.964466	-0.228339	0.341196	0.0545769	0.165593	0.351017	0.590894	0.0251217	-0.00993919	0.0548916	-0.323985	-0.273811	-0.387037	-0.425805	-0.338839	-0.0145416	0.339501	0.0411205	0.00993919	-0.257865	-0.213088	0.208643	0.294325	-0.0116014	0.355713	0.645846	0.377443	0.28121	-0.508997	-0.982892	-0.00988007	0.291563	-0.929882	0.149822	-2.42934	-0.166833	0.00988007	-0.065855	-0.115292	-0.106783	0.579567	-1.41576	0.205549	0.0330811	0.0838223	-0.280932	-0.367414
200035_at	CTDNEP1	0.295135	0.126667	-0.416763	0.159537	0.338305	0.948802	0.406129	0.414336	-0.105322	-0.204186	0.153529	-0.242616	-0.180226	-0.265947	-0.17662	-0.170013	-0.164073	0.07621	0.0641756	0.287407	-0.0641761	-0.110498	-0.114336	0.4718	-0.0781822	0.43359	0.814185	0.178618	0.563568	-0.055306	-0.150887	-0.420487	0.0807056	-0.138778	0.401488	-0.19833	0.0553055	-0.152837	-0.120989	-0.266811	-0.623798	0.645126	0.549663	0.262365	-0.0938654	0.202269	-0.141355	-0.21769
200036_s_at	RPL10A	0.394166	-0.464047	0.000952	0.376342	0.569073	-0.116572	-0.314753	-0.0906277	-0.204364	0.190022	0.312918	-0.286506	-0.194838	-0.530545	-0.37841	-0.000951	-2.12196	0.652037	0.357097	0.817837	0.212159	0.306725	0.242763	0.960456	0.213801	0.957376	0.541063	0.0599298	0.000139	-0.170693	-0.886927	-0.0678444	0.958735	-0.0951481	0.780268	-1.87449	-0.480907	-0.00014	-0.13671	-0.447163	-0.446841	0.479259	-1.22158	0.0766754	0.400016	0.503443	-0.0472422	0.059514
200037_s_at	CBX3	-0.0691547	0.184289	-0.311825	-0.220347	-0.380582	-0.671688	0.0947371	0.0065155	-0.0501823	-0.101696	-0.00651646	0.0978794	0.186187	0.249557	-0.0189028	0.346076	-0.817034	0.136642	0.146394	0.324288	-0.0874586	0.191466	0.3146	0.12878	0.273923	-0.227484	0.222084	0.241344	0.102417	-0.339167	0.136096	1.25236	0.213957	-0.405751	-0.363255	-2.20765	-0.179808	-0.115402	-0.336876	-0.246964	-0.102417	0.184365	-1.50024	0.156879	-0.028018	0.0492697	0.172696	0.263879
200039_s_at	PSMB2	0.148725	-0.817278	-0.466261	-0.3625	0.00679016	0.38912	-0.369963	-0.494644	0.222675	-0.00679016	0.330993	-0.442505	-0.426203	-0.142916	-0.267612	0.0779266	0.491745	0.116825	0.422702	0.218296	0.0319052	-0.0582714	0.269106	0.579643	0.564577	0.66643	-0.608954	-0.0480289	0.144498	0.399197	-0.0196877	0.0196877	-0.119289	-0.842607	0.430942	-0.759309	-0.142471	0.0275421	-0.204365	-0.250863	-0.343841	0.395518	-0.746819	0.711839	0.0385065	0.406711	-0.337477	-0.255051
200040_at	KHDRBS1	-0.0694103	-0.180168	-0.117519	0.500067	-0.241751	-0.195841	0.145273	0.049593	-0.334471	0.084343	-0.229738	0.00600433	-0.187824	0.0243635	0.0733433	0.353408	0.577736	-0.168453	-0.0701017	-0.00600433	0.131523	0.260818	0.151514	-0.0471582	0.0499544	0.119461	-0.0436726	0.26466	0.0605421	-0.302673	0.28721	0.473839	0.00498962	-0.0163994	-0.19042	-1.2524	-0.349926	0.144331	-0.0247173	0.0756416	0.0417461	-0.141476	-1.28225	-0.00498962	0.157235	-0.0903616	0.0708847	-0.0545502
200042_at	RTCB	0.26862	0.0228758	-0.365402	-0.142731	0.428535	0.107131	0.718634	0.420207	0.664555	-0.069952	-0.0228758	-0.262717	-0.0884924	-0.143667	-0.352718	-0.673157	0.0745583	0.131358	-0.124612	0.37282	0.12484	-0.202374	0.458738	0.0677834	0.341381	-0.277533	-0.23606	0.177021	0.275729	0.159507	-0.444478	-0.209038	-0.0139828	0.0316467	0.301601	-0.808419	-0.00778961	-0.174322	0.00778961	0.215171	-0.123983	-0.612935	-0.761938	0.608623	0	0	-0.295549	-0.117918
200043_at	ERH	-0.187905	0.179227	0.284449	-0.180206	0.345612	0.0633307	0.0147953	-0.54201	0.456308	-0.489394	-0.110204	-0.0954113	-0.341758	-0.219173	-0.425858	-0.0147953	1.18696	-0.0910912	0.0372133	0.211214	0.575675	0.173107	-0.0172157	-0.203362	0.582049	-0.0725183	-0.407692	-0.145718	0.0172157	0.0684996	0.302071	0.693832	0.0539904	-0.646457	-0.534439	-1.17245	0.0993881	-0.179365	-0.519466	-0.173547	0.0685854	0.669497	0.886494	0.304491	-0.442721	-0.051033	-0.1322	-0.289811
200045_at	ABCF1	-0.0705528	-1.2677	-1.42804	-0.0445414	0.221007	0.646731	0.364832	0.462386	0.201556	-0.299457	-0.0406179	0.0145521	-0.108718	-0.0808134	0.0973825	-0.559689	-0.526621	0.147626	0.169511	0.0580187	0.144761	-0.0145521	0.477093	-0.491938	0.445592	-0.246876	0.12968	0.324762	0.664387	0.199829	-0.049221	-0.00666523	-0.323432	-0.480946	-0.251478	-0.967668	0.00666523	-0.370637	0.141821	0.281342	0.208605	-0.716057	-0.675185	0.484571	-0.327842	0	0	-0.202776
200046_at	DAD1	-0.110514	-0.473666	-0.661785	0.29072	0.1002	-0.0984507	-0.821439	-1.04771	0.232949	0.299318	0.179205	0.0984507	-0.524794	-0.545738	-0.621872	-0.730472	-0.689013	0.246789	0.326878	0.740581	0.56164	0.651711	0.825938	0.233971	1.19201	0.671536	-1.55351	-0.771996	-0.799728	0.290093	-0.00197983	0.35454	0.53673	-1.024	0.234358	-1.186	0.333138	-0.426441	-0.0189571	-0.391516	0.00197983	-1.22517	-1.04209	0.748355	0.319286	0.390449	0.183409	-0.46966
200047_s_at	YY1	-0.039566	0.381711	0.142763	-0.348115	0.298327	-0.328715	0.248973	0.310472	-0.0138712	-0.105667	-0.193374	0.0800657	0.040513	-0.0386572	0.0138712	0.0877123	0.113832	-0.107467	-0.028657	-0.0757561	-0.0440617	0.279083	0.0458508	-0.315003	-0.331417	-0.337004	-0.101418	0.235016	0.227097	-0.870366	0.343418	0.476601	0.183496	-0.199521	-0.0458508	-1.74104	-0.154762	0.205688	0.156006	0.0971174	0.271254	0.4292	-0.689739	-0.150282	-0.0828323	-0.220226	0.0647316	0.00175858
200048_s_at	JTB	0.0145988	-0.26044	-0.763739	-0.311	0.0617847	0.294741	0.0212288	-0.124512	-0.395207	-0.0679779	0.225744	-0.00684738	0.0819378	-0.00567913	-0.00301743	0.20963	-1.32224	0.149005	0.00301838	0.39518	-0.0267773	0.0972319	-0.215939	-0.0686684	-0.000663	0.398034	0.0261497	-0.03473	0.0187082	-1.00323	-0.986052	-0.345655	0.103184	-0.215103	0.193466	-1.95919	-0.256194	0.0892792	0.148463	0.0157347	0.227601	0.306853	-0.74381	0.000663	-0.125624	0.201905	-0.00919342	0.145394
200049_at	KAT7	-0.507944	0.0255866	-0.104256	-0.0568676	-0.95212	0.252662	0.39778	0.537826	-0.824532	-0.0186887	0.301788	0.0186887	0.477494	0.222589	-0.123677	0.10453	0.52016	-0.3381	-0.296924	-0.297091	-0.091279	0.130029	0.748867	-0.532577	0.303466	-0.215934	0.210854	0.461921	0.278066	-0.902466	0.16332	0.168794	-0.549884	-0.169329	-0.706507	0.192371	-0.113077	-0.251109	0.0954399	-0.125123	0.00219917	-0.00219917	0.349687	-0.622995	0.226369	0.537165	0.450934	0.661644
200050_at	ZNF146	-0.207239	-0.766582	-0.30359	0.172444	-0.0054369	-0.544262	0.526706	0.544638	0.259915	-0.0353641	-0.241488	0.252751	-0.185342	0.0366812	-0.301826	0.0054369	0.737069	-0.316333	-0.0737114	0.466978	0.366353	0.279443	0.427426	0.305468	-0.177662	-0.0834427	0.320192	0.888607	0.652573	0.253045	0.693829	0.807497	0.211222	-0.514553	-0.868344	-1.18417	-0.416149	-0.117155	-0.22753	-0.387054	-0.129743	0.399956	-0.273037	0.0834427	0.102145	-0.00775242	0.434357	0
200051_at	SART1	-0.321699	-1.14476	-0.639564	-0.0470924	0.403304	-0.260304	-0.438631	-0.51692	0.29621	0.00991011	0.233015	-0.204385	-0.00991058	0.175434	0.0248041	-0.420516	-1.0543	0.578252	0.532275	0.350325	0.230215	0.131752	0.289972	0.650102	-0.202058	0.917033	0.283585	0.0523319	0.233271	0.580509	-0.422423	-0.568658	-0.0523324	-0.0535274	0.201276	0.150857	-0.076581	-0.149031	-0.204121	-0.130327	-0.127175	-0.69272	0.528774	0.475668	0.262224	0.374146	0	0.141216
200052_s_at	ILF2	0.0880995	-1.44111	-2.25806	-0.0880995	-0.509731	2.32697	2.1244	2.29203	1.12542	0.594989	0.486196	-0.301948	-0.14928	-0.287978	-0.095202	-0.597752	0.783884	0.177222	0.556002	-0.436976	0.423235	-0.180357	1.24948	-0.120968	1.2234	-0.641852	-0.305727	1.44089	1.55823	0.597831	0.203281	1.2135	-0.93032	-2.03645	0.0304346	-2.40246	-0.0280151	-0.378961	0.0280151	-0.0754995	0.154816	-1.0373	-1.44189	1.13424	0.431043	0.201694	-0.514409	-0.276606
200053_at	SPAG7	-0.0321445	-0.175978	0.218218	0.126144	-0.0687008	0.604057	0.423891	0.418175	0.731567	-0.0628719	-0.00905418	-0.128556	-0.15289	-0.161461	-0.22764	-0.32634	-0.569048	0.191697	0.00905418	0.439606	0.0329418	0.0769129	-0.0727224	-0.00425339	-0.034832	0.0344152	-0.254346	0.174658	0.113753	0.257687	-0.31193	-0.116394	0.211828	0.0504885	0.0297804	-0.35956	0.00425339	-0.403541	-0.437667	-0.327506	-0.568103	0.092803	0.0511713	0.182634	-0.0535755	0.00392628	-0.119041	-0.249261
200054_at	ZPR1	0.414794	0.400346	0.418712	-0.0892968	0.135013	0.419783	-0.0712929	-0.10806	0.381279	-0.282448	0.231133	-0.0146894	0.0110826	-0.0343308	0.00833559	-0.157122	0.113351	-0.130704	-0.00833607	0.0318871	-0.276151	-0.0653696	0.100515	0.79001	-0.47065	0.0262723	0.523059	-0.225253	0.00612068	-0.034852	-0.19044	-0.230569	-0.759641	0.376261	0.0756836	0.38332	-0.127095	0.157286	-0.00612021	-0.058877	-0.16863	0.558406	0.0363469	-0.0903912	-0.269545	0.0994596	-0.03971	-0.022994
200055_at	TAF10	0.668946	0.487958	-1.10621	-0.412355	1.03952	0.175386	0.105352	-0.0122623	0.238881	0.112038	-0.0708017	-0.923746	-0.613974	-1.18928	-1.21995	-1.14373	-1.91153	0.196391	-0.0899439	0.731483	0.0122623	0.218066	0.137475	0.733641	-0.265937	0.675261	-0.316676	0.460855	0.525796	0.21641	-1.10757	-1.63989	0.0222378	-0.0222378	0.817111	-0.31419	-0.344143	-0.460192	-0.312111	-0.839063	-0.851094	0.688948	0.941607	0.788889	0.723653	0.550219	-0.54494	-0.345445
200056_s_at	C1D	-0.0847626	-0.701184	-0.95908	-1.27914	0.16464	-0.874749	0.257303	0.324036	-0.870729	-0.341202	-0.205893	0.155385	0.179669	-0.0627708	0.0141668	-0.053216	0.171484	-0.0102634	0.228377	0.700449	0.0102634	0.744131	0.59744	-0.558363	-0.0678291	-0.445077	-0.0485182	0.277204	0.3257	-1.02906	-0.0371599	0.375988	0.0997839	-0.450021	-0.239533	-1.83454	0.0427427	0.402232	0.0371599	0.293674	0.272137	1.2269	-1.68494	-0.928242	-0.410569	-0.455778	0.162518	0.155968
200057_s_at	NONO	0.213077	-0.40251	-0.590246	0.179805	-0.163809	0.176769	0.639698	0.794444	-0.343187	0.190376	0.00831795	0.00249863	0.00742722	-0.0229883	0.0562506	0.00628376	-0.443309	-0.059412	-0.124568	-0.00249863	-0.123353	-0.0971632	0.470047	0.118477	0.159808	-0.0114288	0.807124	0.689701	0.597055	-0.653127	0.554329	0.528678	-0.0953226	-0.832227	0.176961	-1.69758	-0.288484	-0.153308	0.0114298	0.0724707	-0.167716	-0.319606	-0.0880222	-0.0486612	0.192529	0.0868139	0	0
200059_s_at	RHOA	-0.297437	-0.352872	-0.502641	0.211593	0.00329685	-0.166912	0.993244	1.05196	0.0858536	-0.00329685	0.0637522	-0.0197668	-0.290746	-0.0270824	-0.34878	-0.0609312	0.586684	-0.183443	0.339804	0.3587	0.377882	0.503223	0.725119	-0.238793	1.0098	0.749936	0.330157	1.14676	0.693378	-0.176191	0.334925	1.05307	0.176191	-1.20432	-0.762796	-2.38435	-0.311256	-0.550446	-0.515976	-0.360802	-0.30372	0.22958	-2.28457	0.285364	0.0828838	0.179125	0.0622206	-0.223193
200060_s_at	RNPS1	-0.140733	-0.0926657	0.00685787	0.268949	-0.368818	0.0673647	0.0514765	0.0220356	-0.566055	0.103065	-0.139685	0.0421724	-0.00685787	0.260556	0.293949	0.0795517	-0.754983	-0.196784	0.00888443	-0.195108	-0.220893	-0.125915	-0.150913	0.321335	0.387427	-0.0166807	0.18154	0.0674028	0.0166807	-0.643595	0.256308	0.298309	0.258451	-0.099185	-0.423018	-1.155	-0.415909	0.0578651	-0.252657	-0.102718	-0.158035	0.273084	0.234487	-0.783988	0.195493	-0.0700932	0.122054	0
200061_s_at	RPS24	0.226138	0.0427065	0.275108	0.248673	0.313333	-0.157713	-0.0407791	0.115785	0.334758	-0.380391	0.260505	-0.548971	-0.4196	-0.463552	-0.445454	-0.254406	-1.06488	0.174548	-0.163003	0.238831	-0.226728	0.0407791	-0.139768	0.394219	-0.423729	0.357943	0.99682	-0.000426	0.000426	-0.249248	-0.319194	0.177443	0.175538	0.0788813	0.260939	-1.43403	-0.427443	-0.50486	-0.548737	-0.855485	-0.732991	0.926904	0.154231	0.599067	-0.0133457	0.488734	-0.221179	-0.17664
200062_s_at	RPL30	0.168632	0.0358925	-0.43321	0.279322	0.0260906	-0.444526	-0.0045042	-0.0529556	-0.65337	-0.0479212	0.00837898	0.00450516	-0.0123301	-0.0528698	0.0449581	0.132659	-0.672254	0.192347	-0.133957	0.0538254	-0.0747948	0.0541048	-0.237042	-0.0648813	0.103605	0.140853	0.122701	-0.154036	-0.282911	-1.39378	-0.373691	0.166737	0.0729923	-0.252583	0.17749	-1.9247	-0.20756	0.0648804	0.116564	0.107847	0.0961418	0.126391	-0.0664272	-0.467296	-0.0358639	-0.00159931	-0.0246382	0
200063_s_at	NPM1	0.149013	-0.345709	-0.00870037	-0.0198517	0.0700941	-0.200695	0.249746	0.11791	-0.869203	-0.0921354	-0.0178051	-0.0894947	-0.0217476	0.00596619	-0.00596619	0.0210228	0.141785	0.0213203	-0.0232859	0.0688362	0.0942173	0.266949	-0.0569105	0.0449448	0.243821	-0.239793	0.39809	-0.00325298	-0.088275	-1.08915	0.1902	0.310766	-0.0683756	0.0773354	0.0374184	-1.78039	-0.273017	0.0172129	0.081337	0.00325298	-0.0208588	0.0337343	-0.724196	-0.479178	-0.179421	-0.0326662	-0.173705	-0.0701723
200064_at	HSP90AB1	-0.337421	-2.82281	-1.83497	-0.11016	0.377561	0.917286	1.62276	1.05063	0.273119	-0.034729	-0.462093	-0.343676	-0.533398	-0.566874	-0.191868	-1.05147	0.591751	0.58054	0.647001	0.124872	0.476044	0.034729	1.21885	-0.546614	0.371853	-0.26969	0.647476	1.4952	0.982923	0.134258	-0.00454044	0.546977	0.538539	-0.566195	-0.78727	-2.36154	-0.319642	-0.865836	0.165864	-0.112654	0.00454044	-1.38885	-0.954928	0.484055	0.165449	-0.327194	-0.135377	-0.34451
200066_at	IK	-0.406872	-1.35637	-0.720283	-0.12105	-0.199837	-0.575599	-0.54374	-0.626984	0.0837269	-0.225656	-0.0115032	0.109672	0.0624485	0.0115032	0.180542	-0.0880804	0.673035	0.270258	0.340327	0.325442	0.389828	0.253337	0.283316	-0.0484972	0.388827	0.193795	0.217372	-0.227616	0.0477686	0.451076	-0.537341	0.00159359	0.704067	-0.663762	-0.493293	-1.962	-0.270326	0.224208	0.0673914	-0.00159359	-0.0847168	-0.686157	-0.680053	0.615779	-0.202739	0	0.205839	0.123893
200067_x_at	SNX3	-0.113688	0.332932	-0.273296	-0.0104284	-0.224363	0.00307941	-0.00307941	0.0380478	-0.235804	-0.0378962	-0.171593	0.120964	0.130728	0.0611114	0.0769177	0.141959	0.146491	-0.238456	-0.0703507	-0.142787	0.121503	0.113674	-0.132778	-0.0317078	0.520703	-0.294925	-0.486808	0.0621367	-0.0194378	-1.02511	0.203118	0.530068	0.275491	-0.315978	-0.0303755	-1.12283	-0.0284195	0.0876579	0.0194368	0.220274	0.0384007	0.136834	-1.21522	0.0804329	-0.146736	-0.244873	0.0866098	0
200068_s_at	CANX	-0.0462828	0.182499	-0.108285	-0.480873	-0.165771	0.379354	0.257135	0.120415	-0.550843	0.0213871	-0.0213871	0.102702	0.273166	0.167282	0.0929155	0.246024	0.472308	-0.403475	-0.127995	-0.669532	-0.120303	-0.281953	0.280949	-0.194209	-0.0943766	-0.711466	0.158011	0.168644	0.486156	-1.07465	0.33912	0.43595	-0.480352	-0.277304	-0.10694	-0.977512	-0.330235	0.0929108	0.0126362	0.0808735	0.12563	-0.638199	0.00290871	-0.00290871	0.0951738	0.0467091	0.143487	0.28797
200069_at	SART3	-0.130192	-0.313254	0.0493155	0.194421	-0.886041	-0.78682	0.138542	-0.088582	-0.130414	0.103988	-0.0449152	0.190294	-0.137346	0.487442	0.24982	0.26875	0.422588	-0.260371	-0.019001	-0.4807	0.019001	0.0746365	0.0751333	-0.348158	0.0569344	0.0871925	0.518763	-0.00767708	0.137626	0.00767708	0.792521	1.38899	-0.55485	0.307102	-0.776103	-0.889826	-0.240599	0.186865	-0.246103	-0.170233	-0.0172911	0.0338354	-0.637914	-0.378629	0.317372	0.0799036	0.418087	0
200070_at	CNPPD1	0.191573	-0.00111389	-0.40971	0.00111389	0.0703125	0.389639	0.35614	0.523301	0.390044	0.164026	0.0431623	0.0987368	-0.317005	-0.152935	-0.502249	-0.132669	0.128252	-0.355416	-0.978437	-0.072793	-0.414549	-0.322909	-0.273911	0.283244	-0.456629	-0.521229	-0.628995	0.0701084	0.426682	-0.168275	0.0168495	-0.998567	0.0856447	0.492318	0.167312	0.0615997	0.0705557	-0.0825653	-0.262116	-0.572552	-0.541943	0.283081	1.05137	-0.0168495	0.124808	0	-0.0124054	-0.337642
200071_at	SMNDC1	0.251636	0.729007	0.161554	-0.513466	-0.24842	-0.125381	0.57382	0.354986	-0.578042	-0.0236397	-0.0244074	0.0184774	-0.0583468	0.00884724	-0.00884724	0.271087	1.03898	0.105798	0.513148	-0.304093	-0.258369	-0.0723295	-0.184922	0.0166559	0.0284615	-0.0326805	0.22698	0.541686	0.392018	-0.485211	0.653068	0.700219	-0.531604	0.75016	0.505906	-1.51624	-0.200513	0.377052	-0.0576467	-0.113669	-0.0166559	0.120154	-0.614829	-0.19241	0.0313606	0	0.103405	0.0731211
200072_s_at	HNRNPM	-0.205371	-2.92762	-1.48583	0.157977	-0.58875	-0.334684	0.408304	0.249893	-0.0136595	-0.135757	-0.338871	0.328046	0.315798	0.582833	0.503947	0.0136471	-0.749571	0.557127	0.8345	-0.0136471	0.102779	-0.210414	0.343876	-0.0829945	0.207796	-0.153076	-0.0211973	0.289164	0.11414	0.555357	-0.646738	0.460314	0.566828	-1.20214	-0.825191	-1.9565	-0.577766	-0.0421591	0.243501	0.0211973	0.17306	-2.84244	-1.64237	0.778483	0.0409222	-0.0796375	0.453485	0.558708
200073_s_at	HNRNPD	-0.119892	-0.629951	-0.689771	0.157664	-0.551769	-0.408075	0.192521	0.115069	-0.739991	0.0264568	0.0557899	0.103701	-0.0937376	0.13715	0.118576	0.306814	0.720252	-0.347261	-0.394933	0.0779276	-0.0264568	-0.115064	0.207196	0.289364	0.0768738	0.00870991	0.230437	0.162759	0.078228	-0.0697174	0.0767069	0.42923	0.627285	-0.176052	-0.580467	-1.70617	-0.332531	0.0381174	-0.224562	-0.00870991	-0.0705719	-0.135699	-0.837353	-0.0274572	0.160962	0.24787	0.320588	0.0179052
200074_s_at	RPL14	0.102764	-0.64143	-0.244434	0.876513	0.234095	-0.080101	-0.0160122	0.498203	0.596525	-0.216923	0.157482	-0.755797	-0.778137	-1.0499	-0.852241	-0.978096	-1.50486	0.268589	0.0160122	0.600019	0.0984993	0.143854	0.141891	0.0786667	0.180832	1.00876	-0.19226	-0.22115	0.0945339	0.301078	-0.604274	0.266505	0.761123	-0.424126	0.108056	-2.13573	-0.211338	-0.696305	-0.0786667	-0.92551	-0.503102	0.135818	-1.63567	0.548585	0	0.328328	-0.547964	-0.557929
200075_s_at	GUK1	0.107651	-0.798572	-1.40506	-0.513763	0.340335	1.15485	0.45052	0.769401	0.0260591	-0.0260591	0.206	-0.733583	-0.647711	-0.806902	-0.842505	-0.832104	-2.03076	0.275907	0.309501	0.660669	-0.0701189	0.0989742	-0.15592	0.595861	0.120827	0.755522	-0.491673	0.736909	0.760533	0.301278	-1.60511	-1.13333	0.954444	-0.0098114	1.10882	-1.47834	-0.178064	-0.281066	0.0098114	-0.681036	-0.458601	0.504783	-0.51654	0.575467	0.302477	0.539528	-0.37222	-0.257559
200076_s_at	KXD1	0.254151	0.272246	0.26256	-0.414076	0.0989933	0.137213	-0.245474	-0.336643	0.466979	-0.130124	-0.115119	0.00404501	-0.252302	-0.137085	-0.235423	0.165674	-1.07317	0.315594	0.105517	0.358867	-0.00404501	-0.423631	-0.223753	0.601356	-0.267244	0.141455	0.133714	0.169761	-0.0309381	0.0219898	-0.404687	-0.519068	-0.15122	0.240025	0.457576	-0.293347	-0.241136	-0.0219903	0.0888319	-0.173906	-0.486182	0.251619	0.774771	0.356636	-0.0143685	0.0246701	0.0426393	-0.147001
200077_s_at	OAZ1	0.237747	-0.0679626	-0.273597	0.523541	0.309978	0.568776	0.0516491	0.206364	0.290154	0.00506401	0.0754356	-0.00506306	-0.0689135	-0.12034	-0.069397	-0.190487	-1.28431	-0.0187407	0.254259	0.441777	-0.128934	-0.0466862	-0.171763	0.28742	0.00449181	0.416409	0.334544	0.0590982	0.0823317	-0.562352	-0.110181	-0.138718	0.319964	0.0202351	0.0871849	-1.29733	-0.00449181	-0.136927	-0.138232	-0.265425	-0.23835	0.349401	-0.0395126	0.378151	0.0043087	0.108667	0.00812435	0
200078_s_at	ATP6V0B	0.644209	-0.115614	-1.21115	-0.534294	0.591719	1.00732	0.686691	0.166897	1.08456	0.0730686	-0.0479851	-1.15848	-0.870761	-0.78035	-1.22265	-0.749971	-1.83652	0.497944	0.761417	0.653853	0.0479851	-0.0872688	0.392427	0.221619	0.533629	0.131517	-0.453074	0.256503	0.237145	0.835939	-0.908796	-0.386126	-0.0988178	-0.157095	0.773496	-1.18684	-0.140406	-0.332127	-0.225571	-0.349873	-0.108088	0.586	0.0988178	1.35959	0.188829	0.062767	-0.90638	-0.668015
200079_s_at	KARS	-0.496485	-1.5066	-1.09917	-0.158292	0.0621405	0.573877	1.28798	1.40318	-0.0621405	-0.345063	0.0885181	-0.256402	-0.422553	0.0788555	-0.099205	-0.528049	-0.139602	0.260989	0.331553	0.409917	0.211873	0.239475	0.0241613	-0.0274868	0.372522	0.347372	1.16833	1.0458	0.856585	-0.0241613	-0.549891	0.404984	-0.0875502	-0.867051	-0.328623	-1.91653	-0.47494	-0.578048	0.122956	0.0666399	0.0318565	-0.326479	-1.04373	0.389388	-0.272476	0.258013	-0.281355	-0.339582
200081_s_at	RPS6	0.359509	-0.000733	1.0765	0.711908	-0.312987	0.351239	1.10396	1.39149	0.872231	0.536284	0.242512	0.000733	-0.216707	-0.769812	-0.940199	-1.44617	-0.698703	0.668476	-0.304159	-0.134351	-0.942584	-0.629029	-0.346307	-0.095192	-0.00189781	0.963456	0.675928	0.801683	0.589558	0.000832	-0.0950222	0.466042	0.157243	0.692696	-0.000832	-1.21704	0.0994959	-0.426909	0.317531	-0.711268	-0.632247	-0.00371551	-0.944103	0.551807	0.666902	0.220909	0.0264931	-0.323339
200082_s_at	RPS7	0.419611	-0.89161	-0.334805	0.184722	1.15306	0.423266	-0.270123	0.568739	1.67663	-0.0984659	0.0984659	-0.902627	-0.752862	-0.889915	-0.332839	-0.267516	-1.04575	0.848874	0.777751	0.656934	-0.235621	0.112812	-0.280089	0.207037	-0.0249271	0.374866	0.523288	-0.522089	0.111842	1.06056	-1.13597	0.273718	0.578772	-0.923628	0.60752	-2.52759	-1.00449	-0.0658312	-0.0569325	0.0249271	-0.110296	0.211619	-0.857498	1.26984	-0.02987	0.216494	-0.831803	-0.685681
200083_at	USP22	0.24912	-1.28128	-0.229494	-0.36132	-0.393328	0.302279	0.492271	0.100711	-0.0382919	0.285866	0.245737	0.174396	0.226492	0.173043	0.0382919	0.0730848	-0.49787	-0.142127	-0.0449162	-0.522929	-0.570115	-0.30253	-0.0108423	0.525674	0.57379	0.0108423	0.472266	0.76019	0.572678	-0.222681	0.629924	0.624572	-0.442494	0.0461454	-0.1275	-1.17736	-0.0162373	0.163537	-0.192219	-0.0992365	-0.0173712	-0.904596	-0.165502	0.285922	0.499396	0.417341	0.391152	0.511511
200084_at	C11orf58	-0.346445	-0.0485907	-0.802241	-0.684323	-0.415095	-0.0945902	0.136862	0.226927	-0.737791	-0.161751	0.0471287	0.418596	0.00352478	0.214296	0.131025	0.399497	0.526577	-0.00352478	0.205524	-0.21222	-0.0806599	0.186591	-0.153358	-0.239537	0.382036	-0.134333	-0.0185299	0.423908	0.146392	-1.10735	0.0210648	0.560219	0.201275	-0.439602	0.0185299	-1.72838	-0.118145	0.110967	-0.0739956	0.224988	0.142591	0.331135	-2.79662	-0.231593	0	0.278781	0.553755	0.247107
200085_s_at	TCEB2	0.379951	0.325628	-0.861033	0.0477009	1.23953	-0.582339	-1.43357	-1.30589	1.5885	-0.0477009	0.370079	-0.491819	-0.529166	-1.00552	-0.84383	-0.614308	-1.84645	1.31489	1.13911	1.57198	0.143063	0.367445	0.153467	1.21867	-0.00852013	1.36607	-0.509479	-0.801258	-0.270235	1.5232	-0.93504	-0.873499	1.47032	0.891344	1.27311	-0.529708	0.00852013	-0.0684891	-0.154827	-0.491339	-0.432699	1.23667	1.09037	1.53875	0.0665827	0.35057	-0.488647	-0.489612
200086_s_at	COX4I1	0.427966	0.157967	0.0580902	0.0460243	0.239621	0.0241423	-0.0493517	-0.137588	-0.314767	0.0331116	0.218563	-0.324815	-0.304984	-0.530593	-0.395864	-0.620642	-0.89218	0.33049	-0.0241423	0.314569	-0.0243692	0.213813	0.0534296	0.131888	0.279779	0.164322	-0.592734	-0.123943	-0.322486	-0.811827	-0.821466	-0.307254	0.601367	0.226589	0.32329	-1.11904	0.123199	-0.0693407	0.0516615	-0.339328	-0.0516615	0.291994	0.0553627	-0.0898314	0.06565	0.197497	-0.238465	-0.181942
200087_s_at	TMED2	0.00236797	0.441047	0.763698	-0.0286665	-0.0393648	0.247603	0.402533	0.0650692	0.172866	-0.126032	-0.101049	-0.00236797	-0.03619	0.154088	-0.043294	0.332973	-0.225807	0.019908	0.510196	-0.57705	-0.520259	-0.642464	-0.178344	0.0280314	-0.0371981	-0.116576	0.531133	0.41697	0.2447	-0.562525	0.0326939	1.12891	-0.180725	0.257862	-0.361021	-1.13117	-0.290233	-0.0280314	-0.184367	-0.08568	0.104317	0.963534	0.0282688	0.0326967	-0.0858288	-0.0608263	0	0.0331774
200090_at	FNTA	-0.234704	0.0995283	-0.403023	-0.312283	-0.417344	-0.772265	-0.44096	-0.413688	-0.225491	-0.0929661	-0.0308647	0.301252	0.145766	0.624734	0.0781708	0.372921	0.293765	0.0308647	0.274958	0.073555	-0.080986	0.290073	-0.379867	-0.0655975	0.502718	0.239383	0.527835	-0.0481348	-0.373279	-0.384414	0.150342	0.466893	0.135489	-0.146632	-0.0270014	-1.04048	0.0670786	0.0270014	0.142421	0.170837	-0.228307	0.232258	-0.163453	-0.0750723	0	0.116651	0.446466	0.32806
200091_s_at	RPS25	0.168881	-0.0199375	-0.157182	0.211305	0.246174	-0.229688	0.00753212	0.371243	0.42551	-0.196068	0.242731	-0.486479	-0.577067	-0.739846	-0.620733	-0.176659	-0.71484	0.15737	0.0136375	0.542716	0.0111513	-0.00753212	0.104543	0.295475	-0.380938	0.340061	0.586406	0.0239744	0.00475407	-0.283021	-0.0184298	0.15054	0.368457	-0.00475502	0.126371	-1.726	-0.478694	-0.533596	-0.616047	-0.691547	-0.740451	0.650577	-0.202391	0.161065	0.0605869	0.492882	-0.187422	-0.361696
200092_s_at	RPL37	0.0426683	0.288005	0.662354	0.434678	0.179384	-0.569954	-0.285825	-0.184421	0.331996	-0.271375	0.0916605	-0.0599813	-0.0203943	-0.132467	-0.124528	0.0203943	-0.449584	0.0908709	-0.165586	0.0314922	-0.0597668	0.0574093	0.0993881	0.163799	-0.148574	0.242725	0.0305939	-0.212022	-0.0716686	-0.723088	0.374619	0.248712	0.212543	0.187021	0.122288	-1.13342	-0.178995	-0.0305939	-0.104847	-0.10142	-0.22181	0.333859	-0.270479	0.157183	-0.166731	0.157986	0	0.0216875
200093_s_at	HINT1	0.502156	0.357962	-0.54841	-0.409224	0.037776	-0.0298119	0.0431309	-0.0503826	-0.58777	0.00623989	0.0907335	0.0669794	0.28192	-0.0526457	-0.04247	-0.154448	0.0850525	-0.00623989	-0.32609	0.200246	-0.289469	0.00912476	-0.403273	0.376233	-0.0379705	0.22764	-0.0926905	0.0532541	-0.0158758	-0.906902	-0.591082	0.104984	0.532174	0.426376	0.388472	-1.5654	-0.488868	0.147314	0.0727768	0.0158758	-0.355963	0.518413	-0.646646	-0.823764	-0.00525665	0.0732651	0.0510015	0.371121
200094_s_at	EEF2	0.553089	-0.246369	-0.0364857	0.0753279	1.01975	1.29728	-0.0127792	0.427552	0.407777	0.0804462	0.261006	-0.530821	-0.0863552	-0.204042	-0.059145	-0.0114365	-0.720897	-0.0949964	-0.394602	0.46092	0.0114365	0.0504665	-0.0152292	0.464821	-0.040123	0.0973291	1.59923	0.0131502	0.372193	-0.582792	-0.448322	-0.572636	0.724117	-0.0131512	0.184402	-0.729043	-0.399226	-0.266991	0.0352402	-0.22347	-0.212225	0.417619	0.164483	0.334577	0.11007	0.38371	-0.442182	0
200095_x_at	RPS10	0.326673	0.355399	0.38393	0.509528	0.237917	-0.136882	-0.368626	-0.100386	0.207162	-0.00163841	0.137362	0.00163841	-0.00345421	-0.175315	-0.029273	-0.252106	-0.260538	0.245453	0.0383196	0.313018	-0.104765	-0.110839	-0.2847	0.348558	0.224751	0.550043	0.41524	-0.239289	-0.271705	-0.457973	-0.861279	-0.179749	0.355626	0.492809	0.632751	-0.742356	-0.0231648	0.0231648	0.0498562	-0.249241	-0.419808	0.544227	0.455821	-0.239566	0.0113192	0.193185	0.0428295	-0.0333118
200096_s_at	ATP6V0E1	0.16952	-0.388649	-0.287168	0.275527	0.00797558	0.631219	1.10386	0.714529	-0.0247459	0.489268	0.444459	-0.398181	-0.224169	-0.41324	-0.517061	-0.0635853	0.0965633	-0.0822449	-0.190323	-0.00797558	0.570344	0.531384	0.418125	-0.0682087	0.983813	0.0990696	-0.548746	0.44865	0.320018	-0.0906782	-0.00755501	0.850052	-0.0485573	-0.903444	0.338622	-2.29127	0.419502	-0.192913	-0.137232	-0.256733	0.00755501	0.2679	-1.02791	0.471933	0.279414	0.273412	-0.600477	-0.425161
200097_s_at	HNRNPK	-0.0236082	-0.939148	-0.315768	-0.0960426	-0.137518	0.387433	1.30251	1.2351	-0.583122	0.186719	-0.324728	0.0935545	0.0236082	0.141459	0.160339	0.279016	0.824675	-0.177098	0.193359	-0.105556	-0.0918293	-0.291808	0.463872	-0.442303	0.296411	-1.04259	1.14813	1.17284	0.992922	-1.08886	0.609587	0.744604	0.0251513	-0.153386	-0.59379	-2.38774	-0.211087	0.357828	-0.120223	-0.0251513	0.0803127	0.469889	-0.0619812	-0.118942	0.0414133	-0.425533	-0.0351381	-0.122676
200098_s_at	ANAPC5	0.227574	-0.329728	-1.06369	-0.533451	0.15905	-0.144249	-0.102352	0.0804024	-0.0941696	-0.0304527	0.12972	0.0223722	0.0602322	0.012825	-0.012825	0.196676	-0.320702	0.446447	0.148127	0.286551	-0.0187635	-0.0216017	-0.08922	0.414774	-0.131955	0.117694	0.431397	-0.247083	0.0129604	-0.276235	-0.992395	-0.401582	0.0649481	0.0643253	0.457145	-1.74801	-0.303996	0.421536	0.224499	0.0766487	-0.0186396	-0.0129604	-0.452536	0.319106	-0.0702743	0.0827951	0.0173779	0.0383625
200593_s_at	HNRNPU	0.0138474	-1.05635	0.780478	0.768259	-0.0162926	-0.0862427	-0.207606	0.0908833	0.32962	-0.0138474	-0.0268745	0.107489	-0.469023	0.192132	0.279904	-0.183739	0.192095	-0.0366535	-0.153915	-0.0160952	0.115923	0.0797443	-0.0131826	-0.237853	0.101995	-0.130695	0.430544	-0.463733	-0.453687	0.0231028	0.233599	0.849735	0.304385	-0.267821	-0.693128	-0.537498	-0.0212202	0.181008	0.0131826	-0.239632	0.10841	-0.657463	0.42006	0.132385	-0.0452242	-0.139987	0.0154362	-0.544534
200594_x_at	HNRNPU	-0.0335102	-0.00746918	0.248528	0.220287	-0.392411	0.931639	1.04189	0.835522	0.324217	0.114588	-0.406714	-0.182188	-0.180391	0.032505	0.00746918	0.0847416	0.494608	-0.38592	-0.405037	-0.331215	-0.295515	-0.418671	0.278393	-0.0782652	0.300447	0.0782652	0.718075	0.56573	0.564409	-0.23988	0.97978	1.05113	-0.159755	0.286881	-0.627264	-1.53944	-0.25779	-0.115711	-0.425145	-0.304999	-0.118475	0.889325	0.257317	-0.106611	0.294055	-0.194082	-0.154903	-0.12381
200595_s_at	EIF3A	-0.192395	0.506515	-0.489909	0.00405884	-0.0508146	-0.283845	0.431085	0.437068	-0.789156	-0.034584	-0.0906124	-0.00405884	0.134974	0.198219	0.0457439	0.0895157	0.162681	0.0850191	0.491913	-0.410569	-0.758347	-0.474494	-0.0555153	-0.460787	-0.0508451	0.266247	0.347311	0.442173	0.308996	-0.88979	0.0837555	-0.00408363	-0.210827	0.282961	-0.217534	-1.36678	-0.467669	0.265154	0.00408363	0.182402	0.239344	0.443663	-2.12786	-0.378311	-0.10961	-0.0329504	0.0726852	0.186175
200596_s_at	EIF3A	-0.0117655	-1.98217	-1.03062	0.287662	0.113168	-0.305945	0.691556	0.391405	-0.857852	-0.114594	-0.662766	0.318556	0.0117655	-0.658586	0.372579	-0.935927	1.32004	0.236117	0.169329	-0.453282	0.241879	-0.10406	-0.0976343	-0.458645	0.145875	0.00814819	1.1785	0.555042	0.541926	-0.503946	-0.0952826	0.184214	0.0664568	-1.13538	-0.874433	-1.08611	-0.00814819	-0.22755	0.602855	0.185502	0.290831	-1.00189	-0.463254	0.0929756	-0.0297031	-0.611891	0.369154	0.0666771
200597_at	EIF3A	-0.810858	-0.20973	-0.454142	0.0025692	-0.334932	0.405233	1.07498	0.294044	0.777527	-0.410511	-0.440658	0.535357	0.796454	0.546459	-0.428708	-0.00256872	1.23149	1.24688	-0.205632	-1.28693	-0.0706749	0.273371	-0.0342169	-1.00235	0.103933	-2.19822	-0.852215	0.920011	-0.236908	0.791688	0.751143	1.45185	-0.663353	-0.252931	-1.40257	-1.49354	0.707101	0.558832	0.0342174	0.319966	0.0812411	-1.05686	-1.00372	0.603611	-0.417493	-0.436473	0.589273	0.755774
200600_at	MSN	0.130924	-0.620563	-0.0294533	0.302816	-0.398083	0.921676	1.12255	0.862677	0.560796	0.0477886	0.305563	0.0215931	-0.168033	-0.0392303	-0.0215931	0.101516	-0.104	-0.247555	0.456951	-0.557823	-0.231966	-0.498314	0.748171	0.00496578	-0.13194	0.131322	0.593657	1.15242	0.739039	-0.0080595	1.05747	1.13527	-0.00496578	0.0367918	-0.365318	-1.06125	-0.437892	-0.491241	-0.612287	-0.564623	-0.192768	-1.05453	0.103264	0.17224	0.213408	0.594257	0.151516	-0.00800514
200601_at	ACTN4	-0.260317	-1.5104	-1.38222	-1.0132	-0.278341	0.0671988	-1.28519	-0.80435	-0.543675	0.188789	0.293497	-0.0410557	-0.0278072	0.402517	0.0278072	0.131666	-0.646162	0.745831	1.18786	0.957146	0.645185	0.418994	-0.118022	0.558401	0.158071	-0.229962	0.558625	0.475702	0.192578	-0.584387	-0.400232	-0.937183	0.0670066	0.445234	0.493852	-0.256687	-0.182804	-0.0353255	-0.0897126	0.035326	-0.174095	0.165009	0.589739	-0.414598	0.734238	0.651913	0.57346	0.452598
200602_at	APP	0.161347	-0.218497	0.544077	-0.360242	0.351507	-0.627298	-0.201268	-0.315994	0.849082	-0.0719662	0.451802	0.142268	0.153435	0.148211	-0.11515	0.317487	-0.028635	-0.444874	0.192649	-0.294403	0.028635	-0.0405741	0.041131	0.0383368	-0.151994	0.0268621	-0.0305624	-0.00711727	0.0018301	0.0280619	0.63162	0.131195	-1.13053	0.0837688	-0.715178	-0.958766	-0.125517	-0.19838	-0.395056	-0.389206	-0.0018301	0.548366	0.516891	0.339708	-0.124131	0.401813	0.0938473	0.110591
200603_at	PRKAR1A	-0.126287	-0.304494	-0.552478	-0.417823	-0.234091	0.171803	0.59821	0.555189	-0.319386	0.0109968	0.0774775	0.312634	0.119768	-0.0074625	-0.0189209	0.18365	0.488984	-0.138202	-0.0969782	-0.0445547	0.09375	0.00746155	0.718156	-0.723293	-0.174879	-0.962126	0.0697136	0.420336	0.201412	-1.13893	0.259347	0.531868	-0.0767155	-0.445804	-0.28923	-1.92733	-0.181196	0.0460672	-0.0460682	0.104962	0.0526686	0.309011	-1.68364	0.0966959	0	0.0650778	0.335497	0.13997
200604_s_at	PRKAR1A	0.444245	-1.09385	-0.389075	-0.197194	0.139647	-0.100368	0.161647	-0.0762014	-0.553299	0.0106964	0.113589	0.165561	-0.208918	-0.338974	-0.0726261	-0.423572	1.11619	0.0397167	-0.0106964	0.535748	0.790571	0.551038	0.519341	0.262901	1.0016	-0.534702	-1.95881	0.0455618	-0.26752	-0.751988	0.0555077	0.0643835	0.0792046	-0.687979	-0.0235233	-0.738425	0.408668	-0.0992899	0.137017	-0.13918	0.0235233	-2.11255	-1.10331	0.679217	-0.0300846	0.0564632	0.196064	-0.200058
200605_s_at	PRKAR1A	0.0108929	-1.68182	-0.518886	-0.355014	-0.459458	0.264728	1.24511	1.11357	-1.00866	0.351299	-0.31823	0.197815	0.31534	-0.00433064	-0.0159922	0.127449	-0.0185947	-0.494737	0.0900936	-0.41231	0.258034	0.00433064	0.992056	-0.603035	0.272573	-1.06625	0.197544	1.37074	1.05624	-1.5946	-0.214372	1.16985	0.369323	-1.73942	-0.668434	-3.06252	-0.0556021	0.161211	0.0422678	0.252762	0.220451	-0.0422678	-0.207525	-0.33206	0.443932	-0.283133	0.301315	0.35114
200606_at	DSP	0.32401	-0.779681	-0.283639	-0.0102062	-0.0118227	0.617131	1.00047	0.620374	0.0507975	0.19306	-0.444036	-0.278846	0.214672	-0.43874	0.0102062	0.211934	-0.311831	-0.131736	-0.958257	-0.642392	0.317022	0.203368	0.869065	-0.793132	0.955598	-0.521007	-1.16678	0.467992	-0.172525	-0.82556	0.961618	0.959285	-0.270729	-0.709865	-0.878399	-1.77224	0.172525	0.642497	0.268706	0.458283	0.498084	-0.830895	-1.73611	0.296605	0.0988245	-0.504429	-0.426165	0.123459
200607_s_at	RAD21	0.543538	-0.721572	0.504709	-0.0264664	-0.152751	-0.698067	0.83897	0.0945039	-0.0591955	1.70026	0.0669813	0.0252061	0.0469151	0.279248	-0.231947	-0.452817	-0.205904	0.300606	-0.0613809	0.0665169	-0.0252061	-0.251508	0.0301037	-0.718713	-0.0301037	0.241333	-0.494279	1.33848	0.645832	-0.360148	0.627531	0.103803	-0.808886	-0.174674	0.593364	0.446706	-0.116831	-0.031837	0.543653	-0.156381	0.344985	-1.1052	-0.360858	0.118064	1.70909	0.137429	0	0.0526934
200608_s_at	RAD21	-0.057539	-0.342249	-0.692235	-0.549555	-0.179175	0.144624	0.697967	0.737365	-0.256616	0.0674057	-0.0291719	0.0422201	0.0719509	0.212882	-0.0822687	0.345649	0.652373	-0.319968	-0.121333	-0.0930376	0.0291719	0.258176	0.792372	-0.507239	0.100329	-1.08093	0.189117	1.26116	0.801126	-0.618975	0.7537	1.00251	-0.0454903	-0.64279	-0.225451	-1.55386	-0.142615	0.571511	-0.134884	0.0454903	0.202488	0.22176	-2.16024	-0.119058	0.155334	0.0559673	0.0888376	0.288867
200609_s_at	WDR1	-0.0103254	-0.456115	0.0745707	-0.123703	0.0295706	-0.117754	0.599118	0.0212374	-0.0505457	-0.167488	0.142554	0.00615215	-0.108056	0.274703	0.21285	0.138368	-0.640422	-0.0353823	0.0975542	-0.117358	0.0622072	-0.00615215	0.175635	0.00996876	0.453397	0.112718	-0.0785322	0.444148	-0.103118	0.00191021	0.0217304	0.616578	-0.602586	-0.00191021	-0.0367174	-1.80808	-0.162724	0.182868	-0.00415897	0.101511	0.148927	-0.160967	-0.82661	-0.151263	-0.235598	0.0618858	0.0094614	-0.0890312
200610_s_at	NCL	0.326794	-0.956217	-0.447122	-0.0341997	0.248006	-0.111101	0.168502	0.214959	0.368483	0.157467	0.0174332	-0.073597	-0.162156	-0.0319433	-0.24925	0.253192	0.843407	0.00533199	-0.137826	-0.00533199	0.0804291	-0.16957	0.618326	0.386444	-0.0270119	-0.118622	0.335705	0.185699	0.260237	-0.0422544	0.59239	0.541499	0.0270119	-0.291653	0.02773	-0.935931	-0.473797	0.137209	-0.46347	-0.555191	-0.288323	-0.788855	-0.0841675	0.495045	0.234888	0.0548534	0.0269403	-0.0441771
200611_s_at	WDR1	-0.0158482	-0.604199	-0.81157	-0.442451	0.856255	1.01315	1.36024	0.93211	0.465856	-0.101404	0.0406408	-0.599365	-0.315768	-0.234441	-0.129425	-0.814475	-0.603759	0.433878	0.33051	0.311256	0.271338	0.0158482	-0.140643	0.354606	0.632121	0.0604773	0.412538	0.900787	0.560818	0.560912	-0.675793	-0.539404	-0.0604773	-0.265302	0.07059	-0.128592	-0.365038	-0.518235	0.152738	-0.211107	-0.258647	-0.253072	0.159397	0.293312	0.0600958	0.170156	-0.50075	-0.214107
200612_s_at	AP2B1	0.403935	0.21917	-0.666686	-0.461558	-0.0382886	1.07478	-1.34156	-1.26769	0.539318	0.381425	0.684359	0.0715313	-0.325572	0.0425463	-0.394781	0.0382881	0.0565319	-0.441983	-0.442569	-0.112581	0.0599084	-0.0702777	-0.470305	0.19036	0.431402	-0.0223274	0.344747	-0.944165	-0.977252	0.248993	-0.626151	-0.801057	-0.581407	0.328057	0.340406	0.0556202	0.359177	-0.0658255	-0.108402	-0.201414	0.0223274	-0.216783	0.551441	0.780996	0.129576	0.676799	-0.0014081	-0.505592
200613_at	AP2M1	0.0545387	-1.59429	-1.75405	-0.336832	0.240041	0.894245	0.721492	0.462345	-0.293785	-0.0545387	0.0690117	-0.429717	-0.819387	-0.298775	-0.233058	-0.600826	-2.73629	0.167873	0.329788	0.317668	0.539706	0.511591	0.426025	0.0181723	1.17495	-0.0875463	0.375422	0.593945	0.57712	-0.287485	0.184237	-0.234354	0.173784	-1.12175	-0.56225	-1.56679	0.106263	-0.357797	-0.287701	0.00109673	0.195332	-0.053503	-0.958827	-0.00109673	0	0.158707	-0.491082	-0.842324
200614_at	CLTC	-0.0498743	-0.269525	-0.150989	-0.381243	-0.104209	0.399456	0.577618	0.3599	-0.419118	0.0838499	-0.327356	0.0856495	0.142273	0.079361	0.051013	0.0524187	-0.104486	-0.123002	-0.135106	-0.164117	0.0498743	0.130189	0.2517	-0.707817	0.102927	-0.324964	0.00542831	0.614578	0.350313	-1.05617	-0.0528059	0.0223808	-0.314608	-0.385878	0.0941133	-1.85451	-0.00542831	0.203694	0.175033	0.245298	0.0764027	-0.192618	-1.99978	-0.0948343	0.062499	-0.303395	0.120614	0.0913591
200615_s_at	AP2B1	0.0542469	-1.63656	-1.47866	-0.694696	0.1699	-0.222868	0.225383	0.0304146	-0.0574093	-0.0948763	0.153385	-0.202016	-0.401356	0.259912	-0.0304146	0.0552864	0.104569	-0.0840492	0.662146	-0.0747862	0.363185	0.24723	0.39365	0.269908	0.702968	-0.452416	0.30959	0.545561	0.168011	0.0320659	-0.387989	0.269372	-0.591562	-1.23571	-0.27636	-1.05524	-0.805667	-0.0320663	0.108418	0.17396	-0.269807	-0.52701	-1.12706	0.23889	0.14428	0.414559	0	-0.151509
200616_s_at	MLEC	-0.00742435	-2.10222	-0.709184	0.2268	1.26892	0.300969	0.730612	0.845867	-0.369047	-0.577455	-0.436244	0.689599	-0.198591	-1.42866	-0.328666	-2.33616	0.238354	0.0139256	0.301809	-0.130507	0.659736	0.00742435	-0.319755	-0.520559	-0.535761	0.365015	0.13809	1.28097	1.14556	-0.257219	-0.13809	-0.760931	0.751852	-0.204067	-0.369701	-0.837151	0.182199	-0.893707	0.674122	0.192328	0.436716	-0.945217	1.88533	0.340519	-0.470759	-0.473629	0.701985	-0.188717
200617_at	MLEC	0.747457	-1.27912	-1.72981	-1.10812	0.71654	1.77294	1.43143	1.21525	-0.159921	-0.109749	0.299538	0.0496702	-0.324023	-0.136742	-0.13723	-0.363477	0.148916	0.217201	0.413585	-0.421417	0.380983	-0.0496702	0.498955	-0.0162725	0.408444	-1.36602	0.581674	1.59093	1.02781	-0.472647	-0.0449753	-0.1563	-0.553608	-1.28241	0.0432863	-1.20154	-0.356548	0.0162725	0.0931339	0.566721	0.596843	-1.48148	-0.462432	0.174725	-0.115124	0.231517	0	-0.391554
200618_at	LASP1	0.26992	-0.682301	0.198544	0.0954552	-0.0255413	0.0589485	0.506287	0.462749	0.137201	0.0458031	0.052886	-0.1294	-0.12364	-0.0878058	-0.247335	-0.0016861	0.0750046	0.0016861	-0.0285378	-0.377319	-0.0833988	-0.221487	0.442184	0.187548	0.112957	0.117553	0.682746	0.722805	0.610326	-0.25455	0.274513	0.426764	-0.143544	-0.378196	-0.506425	-0.829893	0.0975494	-0.105226	-0.22415	0.0499182	-0.214808	-1.03595	-0.413046	-0.0499182	0.152175	0.151299	-0.0390081	-0.0138645
200619_at	SF3B2	-0.445287	-1.34493	0.587747	0.0224304	-0.564816	-0.333669	0.0457659	-0.0356684	-0.548084	0.0939016	0.62064	0.0899372	0.236656	0.359179	-0.0224304	-0.621556	0.305366	0.566042	-0.148213	0.0248346	-0.0863667	-0.0420265	-0.101953	-0.458807	0.525945	0.611961	-0.0515242	-0.337542	0.0515242	-0.318623	-0.571979	-0.624847	0.197326	0.701543	0.191265	-1.28106	0.22676	-0.378217	0.43681	0.168003	0.118	-0.972897	0.316415	-0.0841284	0.0530338	0.716339	0.0595045	0.278457
200620_at	TMEM59	-0.0347033	-0.581691	0.0588188	-0.0540495	-0.170859	0.234569	0.4772	0.431722	-0.317075	-0.416986	0.0845528	-0.107656	-0.0315876	-0.0126476	0.162377	0.193608	0.332381	0.0727882	0.581708	-0.223133	0.0126467	-0.0172844	0.342146	-0.120599	0.45591	0.114906	-0.0074749	0.11799	0.239475	-1.08447	-0.190396	0.536673	-0.239559	-0.566236	-0.077076	-1.5231	-0.145954	0.300076	0.00747395	0.33154	0.537509	-0.147564	-0.906221	0.0503397	-0.481934	0.0268383	-0.172523	-0.133277
200621_at	CSRP1	-0.415765	-0.495566	-2.8677	-0.468117	-1.26856	-0.808	-1.34109	-1.36007	0.570521	0.593107	0.710883	0.616902	-0.100496	0.256181	-0.0615835	0.0615835	-0.780681	0.732001	0.897725	0.921959	0.812809	0.388591	0.153224	0.180213	-0.51619	0.914825	0.478174	-0.219854	-0.958353	0.97452	-1.83625	-1.27571	0.849064	0.0248375	-0.625311	-0.378988	-1.22962	0.0450115	-0.0248375	-0.972632	-0.17513	0.373078	0.419309	0.339581	1.19546	1.35476	1.2741	0.0881481
200625_s_at	CAP1	0.342161	0.174353	0.255363	-0.0147448	-0.495117	0.0713119	0.18745	-0.215589	-0.836276	0.0395803	0.410924	-0.112681	-0.0256109	0.369824	-0.118301	-0.0220737	0.0147448	0.0852518	0.41955	-0.356994	-0.263472	-0.095602	0.0190935	0.867902	0.589416	0.926427	0.644573	0.329241	-0.0787411	-0.85204	0.503457	0.647222	-0.226601	-0.234062	0.243403	-1.33416	-0.331092	-0.0190935	-0.0376701	0.0470438	-0.50467	0.0647316	-0.446878	-0.487137	0.237407	0.659622	0.00834179	0.180183
200627_at	PTGES3	0.140013	-0.0206089	-0.0904312	-0.311058	-0.694021	0.194813	0.746753	0.543642	-0.309844	0.210011	0.0351744	-0.191307	0.0128536	-0.0128536	0.057682	0.298057	0.239353	-0.142196	0.182832	-0.093852	-0.410479	-0.473674	0.186342	-0.078104	0.281855	0.00122356	0.108112	0.735792	0.42988	-0.485149	-0.476336	0.360423	-0.00122356	-0.171429	0.323687	-1.99052	-0.359873	0.0489635	-0.304303	-0.385958	-0.316772	0.0443277	-2.48699	0.155652	0.212344	0.0570307	-0.132066	0.0327873
200628_s_at	WARS	-0.180574	-0.577468	-0.0803575	0.17947	-0.180381	-0.108099	0.484676	0.688165	-0.0391016	0.0391016	-0.394493	-0.460873	0.0727162	0.532928	0.719525	0.0733933	-0.089076	-0.216838	1.2493	-0.346692	0.322454	0.114808	0.408656	-0.321543	0.610035	0.996962	0.508569	0.540729	0.244763	0.477808	-0.227394	0.0576029	-0.481127	-0.102854	-0.557142	-0.854925	-0.42027	-0.142571	-0.0437045	-0.146532	0.043705	-0.175525	0.202133	0.159741	0.242111	-0.205176	-0.0511451	0.362387
200629_at	WARS	-0.127562	-0.714016	0.127562	0.631675	-0.220399	-0.287228	-0.379095	0.168976	-0.598751	0.348376	0.186635	0.444771	0.464519	1.24292	0.962967	0.941067	-0.216013	-0.263878	1.42776	-0.671493	-0.249722	-0.487608	-0.376709	0.701699	0.337341	1.47913	0.613097	-0.171675	-0.0357361	-0.543678	-0.970642	-0.546311	-0.128876	0.0357361	0.140947	-0.960899	-0.891133	0.186138	0.270331	0.192903	0.162253	-0.579814	0.868969	-0.510448	0.750784	0.579382	0.801247	0.871397
200632_s_at	NDRG1	-0.439331	-0.645212	-1.87217	-0.896467	-0.39621	0.181147	-0.0177975	0.148894	-0.455767	0.0560122	-0.22157	0.0234165	0.0177975	0.0491018	-0.416835	-0.502623	0.340563	0.0874424	-0.362184	0.0942793	0.0313063	0.107932	0.357014	-1.1686	-0.0583382	-1.4126	-1.51663	0.130364	0.355371	-0.863217	-0.173754	-0.239293	0.229126	0.18434	0.00795078	-0.86945	0.15435	-0.095089	-0.00795174	0.112968	0.101482	-0.645604	0.291532	0.410732	0	-0.293628	-0.00110626	-0.0195179
200633_at	UBB	-0.0578289	-0.244788	-0.302376	-0.146497	-0.000405	-0.0954657	-0.280068	-0.378444	0.0318241	0.0376263	0.0190611	0.000405	0.0357742	0.066741	-0.00871277	-0.0332203	-0.255415	0.0809584	0.054369	0.0311556	0.00785541	0.0784969	0.272162	0.123214	-0.0224791	0.00606823	-0.662646	-0.137229	-0.0382147	-1.02578	-0.0550718	-0.396262	-0.00606823	0.038455	0.16929	-0.748036	0.153948	0.161883	0.125631	0.149569	-0.00809765	-0.337385	0.233092	0.010067	0.0524616	0.00850105	0.00649166	0.0385933
200634_at	PFN1	0.731557	-0.786685	-0.665432	-0.0177655	0.788211	1.37121	2.61233	2.46436	1.32858	0.0177655	-0.118088	-1.17958	-1.14293	-0.981483	-0.99247	-0.743778	0.257152	-0.678431	-0.358761	0.443717	0.27253	0.384972	-0.0506263	0.500418	0.779628	0.526245	0.108131	2.20444	1.85837	0.315053	0.302231	0.385672	0.0426292	-0.641183	-0.391625	-1.16059	-0.584162	-0.833748	-1.08366	-1.6715	-0.82938	-0.91157	0.852788	-0.0426297	0.314274	0.136972	-0.818472	-0.66706
200635_s_at	PTPRF	1.2852	0.0175033	0.587795	-0.128369	0.173881	-0.0175033	0.379949	0.373845	0.747999	0.882145	0.304685	0.034059	-0.142757	-0.281949	-0.260345	-0.117845	-0.596953	-0.160145	0.0682878	-0.459992	-0.433315	-0.507809	-0.49189	0.184616	-0.386592	-0.200096	0.191257	-0.0795793	0.197844	0.289626	-0.00685597	-0.0369606	-0.528726	0.316246	0.0862918	0.270203	-0.0444818	0.0316467	-0.514673	-0.791464	0.00685644	-0.906976	0.755308	0.457469	0.844457	0.440489	-0.110617	-0.182764
200636_s_at	PTPRF	0.380333	-1.20317	-0.508306	0.033205	0.243237	1.67564	1.14997	0.960791	0.993077	-0.00725079	0.282135	-0.0681152	-0.473924	-0.465207	-0.324022	-0.45448	-0.463778	0.00725079	0.094058	-0.818481	0.15292	-0.324621	0.206965	-0.031867	0.208073	0.031867	0.674641	0.781506	0.936756	0.716932	0.617258	1.02666	-1.33109	-1.12519	-0.669363	-1.62759	-0.161426	-0.539784	-0.275771	-0.136276	0.274094	-1.16421	-0.170501	0.249101	0.0601997	0.333177	0	-0.416239
200637_s_at	PTPRF	0.183449	0.108095	0.342903	-0.399497	0.552899	0.327837	0.224513	0.0427346	0.387123	-0.200171	-0.0844989	-0.295742	-0.420933	-0.472936	0.00290346	-0.43422	-0.753527	0.187662	-0.00290346	-0.295886	0.234615	-0.0853395	-0.100567	-0.096065	-0.562835	-0.235325	0.109859	0.126638	0.399345	0.214052	-0.439199	-0.563738	-0.0538726	-0.242505	0.0761614	-0.1738	0.305108	-0.14348	0.128017	0.197598	0.0538726	-0.727967	0.233589	0.0586815	-0.205123	-0.00749683	-0.214197	-0.390667
200638_s_at	YWHAZ	-0.541186	-0.904223	-0.865108	-0.454217	-1.06566	0.196111	1.25579	0.720244	0.913942	-0.226969	0.0966673	0.0112238	-0.152719	-0.0112238	-0.619521	0.263422	1.78392	-0.71342	0.222946	-0.0527115	0.461282	0.406242	-0.0936194	-0.442567	1.01947	-0.507791	-1.11874	1.17458	0.387786	0.664906	1.93291	2.96656	-0.423521	-0.55239	-1.67753	-2.85868	0.0936194	0.237472	-0.594365	-0.307086	0.245518	0.0959005	-2.7906	0.924536	-0.13869	0.165188	0.0196571	-0.0656919
200639_s_at	YWHAZ	-0.513089	-0.207111	-0.223454	-0.120163	-0.500786	-0.0546408	0.0531893	-0.130941	-0.26441	0.321771	0.605391	0.163752	-0.0937176	0.26528	0.144042	0.326322	0.463824	-0.251206	-0.0531893	0.152437	0.427746	0.637221	0.199853	-0.0306244	0.303494	-0.391931	0.320312	0.142293	-0.245105	-0.707198	0.386518	0.229005	-0.230074	-0.854761	-0.489962	-1.62263	-0.291839	0.153925	0.0306244	-0.0744362	0.418378	0.140708	-0.719722	0.306869	0.203873	0.46645	0.0551558	-0.261923
200640_at	YWHAZ	-0.704806	-1.13036	-0.527354	-0.189776	-1.10432	0.501467	0.940512	0.605528	-0.0933008	0.369513	0.0149698	0.0398846	-0.217161	-0.0149698	-0.109727	0.128643	0.832817	-0.137128	0.161468	-0.0653105	0.329551	0.21873	0.416061	-0.427769	0.890903	-0.53653	1.25347	1.02145	0.478548	-0.502286	0.474196	0.437362	-0.317742	-2.66081	-0.957654	-2.68093	-0.206175	0.137426	-0.118078	-0.0768023	0.264102	0.157312	-2.41356	0.0768023	0.433581	0.0692043	-0.00190735	-0.195336
200641_s_at	YWHAZ	-0.485227	-0.404416	0.341187	1.05452	-0.602207	-1.05587	0.256796	-0.434768	-0.0257864	0.0257864	-0.555469	0.123229	-0.0940075	0.630055	0.117066	0.194337	-0.581645	-0.24678	0.437246	0.171011	-0.337943	0.319884	-0.145367	-0.501675	-0.24539	0.291305	0.062459	0.331049	-0.757018	0.494335	-0.163935	0.236998	-0.0184107	-0.302939	-0.365695	0.0184102	0.534657	-0.203433	0.229712	0.0573602	0.143643	-0.618678	-0.562234	0.7265	0	-0.590047	0.194396	0.0413976
200642_at	SOD1	0.408137	-0.689374	-1.27879	-0.164433	0.253572	0.622258	0.724216	0.622417	-0.697812	0.142623	0.026576	-0.431945	-0.164065	-0.321219	-0.026576	-0.488386	0.327016	-0.125118	-0.332154	0.139719	0.169602	0.354861	0.434739	-0.00872707	0.611667	-0.638755	-0.841859	0.484309	0.49822	-1.30246	-0.331457	-0.199578	0.242482	-0.0671711	0.127356	-1.76166	-0.0292244	0.00872707	-0.0100584	0.0716867	0.116482	-0.588651	0.196299	0.11907	-0.00430012	0	-0.430885	-0.275256
200643_at	HDLBP	-0.224559	-1.08059	-1.60399	-1.31527	-0.0144405	1.02266	0.3845	0.314564	0.0171528	0.0144405	0.211496	-0.384052	-0.410736	-0.29973	-0.376332	-0.953094	-1.7042	0.292687	0.401196	0.313471	0.362034	0.0588007	0.865726	-0.085556	0.451625	-0.00484562	0.10969	0.431152	0.514301	0.217678	0.000707	-0.394381	0.117835	-0.649217	0.136136	-1.01579	0.0807066	-0.800301	-0.0176048	-0.000707	-0.274883	-1.15471	-0.795801	0.617541	0.274007	0.590708	-0.146384	-0.143305
200644_at	MARCKSL1	0.300064	-0.335809	0.760373	0.716357	-0.0285339	-0.304606	0.648345	0.404969	0.118608	-0.0961371	-0.178912	-0.00783539	-0.32593	-0.127502	0.0451717	0.17065	0.301188	0.00783539	0.0237675	-0.581017	-0.362299	-0.191063	-0.0139732	1.2527	1.25191	1.03813	1.6246	1.01221	0.616989	0.670944	1.79389	2.46244	-0.667615	-0.409168	-1.30388	-0.397576	-0.488355	0.11872	-0.34641	-0.375754	-0.247215	0.0139732	-0.826813	-0.791725	0.238518	0.137794	0.317285	-0.209507
200645_at	GABARAP	-0.00857449	-0.533369	-1.29067	-0.133177	0.197773	0.548351	0.0592909	0.169044	0.175294	-0.207483	0.00857353	-0.706755	-0.980611	-0.968506	-0.864142	-0.690505	-0.728252	0.123167	0.250126	0.517971	0.140596	0.25692	0.387132	0.184579	0.404756	0.0851459	0.0580273	0.243831	0.36983	-0.207951	-0.283616	-0.809429	0.202156	-0.668917	0.362811	-1.65971	-0.0580282	-0.402701	-0.401208	-0.787502	-0.419693	0.475884	-0.466188	0.393212	0.335104	0.450351	-0.241608	-0.508265
200646_s_at	NUCB1	-0.275351	-0.772127	-0.63169	-0.633031	0.416649	0.53543	0.0308981	-0.371397	0.135549	0.306254	0.233638	-0.230874	-0.0308981	-0.256679	-0.0930276	-0.122584	-0.642825	0.765793	0.852809	0.321129	0.782475	0.371559	0.186756	0.119598	-0.286747	0.042263	0.0781288	-0.033495	-0.35174	-0.101635	-0.386533	-0.662224	-0.0525436	0.033495	-0.222061	0.0388684	0.45347	-0.307014	0.038784	-0.0674605	0.127931	-0.434485	0.24665	0.674584	0.156292	0.0824442	-0.176796	-0.0305381
200648_s_at	GLUL	0.0987573	-0.347251	-0.793266	-0.432591	0.11765	-0.682039	0.270067	-0.166314	0.0510135	-0.258261	-0.147872	-0.0669203	0.0640659	0.21623	-0.0510135	0.54535	-0.373532	0.356792	-0.295297	1.28257	0.283158	1.59548	-0.640944	1.67239	0.398541	0.000684	-0.000684	0.264052	-0.0229025	0.755613	0.00154305	0.543078	-0.543176	-0.327052	-0.156875	-0.0697141	-0.276	0.0346065	0.346819	0.0904403	-0.00539637	-0.333359	-1.00335	0.41332	-0.162109	-0.0262814	0.193945	0.461135
200649_at	NUCB1	0.0922585	-1.68639	-2.26767	-0.978372	-0.250161	0.905725	-0.528213	-0.386708	-0.681214	0.151142	0.0616188	0.196246	0.322051	0.124525	0.0249596	-0.180396	-1.86959	0.707911	0.471857	-0.0249596	0.257522	-0.130768	-0.010704	0.010704	0.277695	-0.831884	0.0622082	0.333288	0.118629	-0.694225	-1.01279	-1.51193	0.222965	-0.391185	0.0287237	-0.888248	-0.0639343	-0.190229	-0.0196362	0.147767	0.370665	-1.32577	0.273164	0.0993729	0.384901	0.262458	0.361869	0.458874
200650_s_at	LDHA	0.64135	-0.12044	0.0396509	-0.053791	-0.119188	0.553861	0.920775	0.632749	-0.856665	-0.0698776	0.239506	0.194412	-0.03965	-0.17088	0.222985	-0.15981	0.423181	-0.626245	-0.617561	-0.656643	0.062212	0.272005	0.0870991	0.0843134	0.425404	-0.101244	0.251088	0.671748	0.562678	-0.853542	-0.328813	0.34693	-0.147035	-0.297894	-0.0453701	-2.01004	-0.257826	0.171023	0.000278	-0.000278	0.480965	0.501506	-1.22251	-0.187512	-0.171358	0.17167	0.0856628	-0.114182
200652_at	SSR2	0.443167	0.0680819	0.225818	0.083663	0.351253	0.651973	0.00855637	0.252522	0.785024	-0.0755796	0.128593	-0.58833	-0.460006	-0.336719	-0.592947	-0.330046	-0.830047	-0.00855637	0.0336485	-0.0580597	-0.235618	-0.341907	0.528105	0.559609	0.639572	0.852044	1.07009	0.0261497	-0.0261497	0.692295	-0.0423565	-0.189335	0.198156	-0.0591154	0.55505	-0.669925	-0.0455561	-0.189576	-0.101975	-0.0764103	-0.352233	0.43167	-0.659867	0.715042	0.145232	0.368123	-0.358913	-0.272677
200654_at	P4HB	-0.295134	-1.13771	-0.66349	0.0274334	0.145256	0.747201	0.725599	0.568402	-0.0871839	-0.176941	-0.0274334	0.219265	0.250179	0.0544758	-0.138813	-0.130176	-1.14569	-0.573284	0.0577755	-0.235443	0.327194	0.0486412	0.00079	-0.00778294	0.603417	0.589473	1.15967	1.00072	1.04755	-0.193908	-0.00553322	-0.00079	0.134116	-0.339222	-0.229424	-1.90223	-0.227373	-0.288377	-0.0677166	0.167093	0.15731	-0.322276	0.0247269	0.347154	0	0.142428	0.434266	0.434178
200656_s_at	P4HB	-0.0583048	-1.06287	-0.430299	0.0315719	0.507431	1.0339	1.50952	1.65743	0.603604	-0.0303564	-0.00523233	0.00523233	0.0130372	-0.153756	-0.439608	-0.452897	-1.09924	-0.301348	0.492924	-0.0371084	0.928552	0.597864	0.453684	-0.504663	-0.0188313	0.0188317	0.85995	1.4587	1.39106	0.136926	0.0484748	-0.0699043	0.107835	-0.592265	-0.628627	-0.99774	-0.0539155	-0.668436	-0.164277	0.142097	0.188752	-0.665421	-0.303863	0.983659	0.0405087	-0.0126762	-0.0102816	0.0317068
200657_at	SLC25A5	0.311954	0.048296	-1.27579	-0.19853	0.348928	1.19566	0.998905	0.786055	0.130338	0.124349	-0.0719042	-0.656004	-0.101191	-0.617925	-0.40473	-0.339658	0.160904	0.219513	-0.264441	-0.0207262	0.0207272	-0.164609	0.235938	-0.00506401	0.566379	-0.823816	-1.61233	0.544639	0.292347	-0.90936	0.105433	0.0664501	0.419715	0.215023	0.166149	-1.79802	0.242246	0.00506306	-0.0649185	-0.258865	-0.421684	-0.165153	-0.251578	-0.0146112	-0.0133848	-0.217844	-0.756002	-0.16065
200658_s_at	PHB	-0.00206471	-2.86223	-1.75131	0.00206471	0.628195	0.0657282	0.615423	0.224528	1.37512	0.0238543	-0.510302	-0.969783	-0.484433	-1.3654	-0.98699	-1.34076	-2.61863	0.84955	0.423008	0.546079	0.314877	-0.298462	1.01881	-0.0510282	0.539169	0.361309	-1.68372	0.638105	0.476682	0.859426	-0.470375	0.381903	1.05705	-1.88892	0.0510282	-1.76712	0.377641	-0.616242	-0.288123	-0.315517	-0.514707	-1.82489	-1.20308	2.06661	0.6362	-0.0482349	-0.456998	0
200659_s_at	PHB	0.598908	0.0560503	-1.21316	-0.330323	0.722218	1.36219	1.1917	0.983448	0.25108	0.396484	-0.0560503	-0.576964	-0.517764	-0.685906	-0.471977	-0.719645	-0.286873	0.304749	-0.295557	0.120092	0.249188	-0.0576382	0.932442	-0.0942993	0.363758	-1.0348	-1.30401	0.579776	0.900587	-0.204267	-0.271079	-0.391725	0.869784	0.269386	0.751811	-0.279346	0.31807	-0.257172	-0.0922499	0.0922499	-0.18365	-0.341254	0.409765	0.878358	0.154474	-0.286469	-0.819723	-0.666226
200660_at	S100A11	1.17421	-1.35001	-1.51934	-0.66208	0.223447	-1.00972	0.077415	-0.69077	0.304294	-0.0774155	0.77684	-0.496418	-0.441781	-0.703783	-0.265857	0.149631	-1.83591	0.20812	0.408237	1.10178	0.240792	0.305489	-0.379313	1.80913	0.683537	1.50914	0.964888	0.438783	0.152801	1.43878	-1.40284	-0.46058	-0.298098	-1.38638	-0.0691996	-0.729312	-0.665688	-0.30155	-0.154374	-0.550629	0.0691991	1.04396	0.781071	0.485762	0.575432	1.32621	-0.0720386	0
200661_at	CTSA	0.640407	-0.822695	-2.14554	-0.84132	1.36441	2.03659	1.9069	1.37876	0.883622	-0.14757	-0.166751	-0.606931	-0.663037	-1.07319	-0.946979	-0.984619	-0.704246	0.237941	0.14757	0.36105	0.882269	0.151458	0.687726	0.140639	0.44193	-0.928795	-0.685044	1.71371	1.69491	-0.217092	0.375701	-0.381526	0.167285	-1.09225	0.215161	-1.0224	-0.125671	-0.329906	-0.00841522	0.00841522	-0.0443201	-1.15006	0.589889	1.06286	-0.0324554	-0.12285	-0.484549	-0.550426
200662_s_at	TOMM20	-0.300185	-2.30187	-2.30398	-0.988894	-0.377363	0.0507584	1.03216	1.09141	-0.804924	-0.00949192	-0.262398	0.295309	0.0439596	0.00949192	-0.133707	0.237212	0.845146	0.222503	0.443061	0.195727	-0.0108356	-0.10587	1.08781	-0.369453	0.176213	-1.25942	0.792916	1.62029	1.45303	-1.05242	-0.236514	0.474366	0.251992	-1.09794	-0.176213	-2.11884	-0.511372	0.563924	0.296	0.515758	0.442662	-0.526575	-1.44629	-0.200669	0	-0.245696	0.316717	0.0677872
200663_at	CD63	0.418277	-0.452474	-0.16797	0.299486	-0.0846157	0.281445	0.803892	0.613324	-0.104853	0.204291	0.222863	0.04492	-0.376215	-0.146709	-0.406236	-0.809704	0.419251	-0.385093	-0.107965	-0.04492	0.518906	0.121655	0.735571	0.330191	1.46948	0.700667	-0.341259	0.75454	0.341309	-0.279487	0.493579	0.989909	0.0435829	0.440929	-0.381417	-1.15812	0.0910873	-0.748045	-0.362914	-0.625573	-0.0562105	-1.25558	-0.0907431	-0.0435829	0.348962	0.291064	0.144866	-0.239583
200664_s_at	DNAJB1	0.281739	0.0263014	-0.568474	-0.333312	0.275651	0.643146	0.182381	0.267282	0.238232	-0.657833	0.0296216	-0.631391	-0.361323	-0.849374	0.378233	-0.870913	-0.141742	-0.163488	-0.489847	-0.0263019	0.0279059	0.34263	-0.354785	0.0640678	0.209055	-0.142735	-0.132496	0.0763817	-0.0452008	-0.078681	-0.347953	-0.62543	-0.13472	0.929888	0.0320516	-0.495331	-0.0320516	0.402642	0.643866	-0.384918	0.69471	0.138477	0.981734	0.68352	-0.6979	0.0445013	-0.588217	-0.351156
200665_s_at	SPARC	-0.600846	0.0150194	-0.697933	0.00239468	-2.14155	-0.393566	0.313035	0.700123	-0.146926	-0.11941	0.279681	0.174893	0.352926	0.28494	-0.342133	-0.175233	0.376203	-0.00653744	0.401893	-0.0667295	-0.00239468	0.139073	0.509896	0.250934	1.40217	1.64155	1.46822	2.25581	1.55439	1.27223	1.17398	1.11952	-0.0293274	-1.06306	-1.01669	-1.52497	-1.66413	-0.271621	-0.814659	-0.628191	-0.841399	-1.00615	-0.445611	0.0293274	0.134322	0.524929	0.397007	0.837216
200666_s_at	DNAJB1	0.695234	-0.223669	-0.392557	-0.281884	0.50279	1.30907	1.52673	1.19536	0.466055	0.0139275	0.191336	-0.881609	-0.233625	-1.29668	0.142803	-0.946238	-0.198782	-0.268069	-0.256043	0.338897	0.00016	-0.00016	0.405433	-0.369329	0.202652	-0.508446	-0.364737	1.02459	0.606387	-0.327867	0.544237	0.212708	-0.0571327	-0.319095	0.0571327	-1.605	-0.0683622	-0.178408	0.361743	-0.376332	0.601367	-0.73408	0.976725	0.914889	-0.0784864	-0.0916367	-0.987184	-0.397325
200667_at	UBE2D3	-0.308608	0.278231	-0.25654	-0.00658703	-0.331324	0.062603	0.396174	0.326678	-0.904583	-0.146522	-0.202819	0.125976	0.00393105	0.116195	0.197403	-0.0250454	0.186294	-0.00393105	-0.2057	-0.0692434	0.189369	0.314914	0.0208626	-0.727808	0.335613	-0.808873	-0.235302	0.0442495	-0.0655108	-1.37592	-0.214029	0.471859	0.193165	0.041687	-0.323725	-1.77456	0.149766	0.0240097	-0.0208626	0.216263	0.427284	0.163735	-1.50641	-0.205103	-0.323546	-0.34472	-0.00766659	-0.112663
200668_s_at	UBE2D3	0.240136	0.348328	-0.0152788	-0.140551	0.192545	1.13069	0.97692	0.921271	-1.16029	0.0483923	-0.0191326	-0.579662	-0.367162	-0.134409	-0.0192995	-0.0836535	0.662746	0.0152788	0.301598	-0.275384	-0.146149	0.0279055	0.484215	0.0563526	0.363143	-0.0240469	1.29913	0.962064	0.6734	-1.78937	0.477812	0.392732	-0.425444	-0.0239439	-0.134714	-1.92756	-0.396887	-0.0141859	-0.12035	0.089386	0.0141859	1.16704	-0.883343	-0.962207	0.0354338	0	-0.554359	-0.367059
200669_s_at	UBE2D3	0.408861	0.102908	0.571101	0.567663	-0.147287	0.0185537	0.594817	1.14186	0.127556	-0.0526562	-0.0688286	-0.314281	-0.411989	-0.128798	-0.240135	0.00583363	0.0201807	0.035449	-0.0996103	-0.00583363	-0.601811	-0.317637	0.0229816	0.185362	0.00874996	0.455502	0.413243	0.0616951	0.167403	-0.354931	0.373604	0.325033	-0.00874996	-0.519337	-0.496768	-0.874042	-0.165768	-0.49417	-0.218691	-0.735507	-0.567135	0.380261	-0.127854	0.266396	0	0.175737	-0.200761	-0.262503
200670_at	XBP1	0.420792	-0.387547	0.726095	-0.80402	-0.20771	1.30626	1.18299	1.33366	-0.20233	-0.0442596	0.459665	0.0243425	-0.153042	0.462841	0.27165	0.0218596	-0.289881	-0.0218596	0.180388	-0.427348	-0.566095	-0.324248	0.166384	0.178603	0.00448799	2.15758	3.22242	1.11422	0.61089	-0.686456	-0.0104976	1.41195	-2.03696	-0.400628	-0.26644	-1.37739	-0.45803	0.12906	-0.00448847	0.129816	0.246327	-0.102787	-0.234458	-0.192627	0	0.378583	0.0963559	-0.0904078
200671_s_at	SPTBN1	0.36541	-0.175247	0.787135	-0.323231	-0.376942	-0.164821	1.19204	0.706254	-0.000504	0.222487	0.326562	0.323179	0.768708	0.58836	0.106451	-0.548509	-0.513178	0.000504	-0.0539756	-0.623956	-0.597237	-0.632539	0.0724368	-0.341598	-0.146339	0.205503	0.380837	1.3672	0.805888	-0.448956	0.222144	-0.524219	0.448683	0.0755105	-0.355248	-0.0124912	-0.329787	-0.306466	0.311972	-0.529152	-0.0277014	-0.139459	0.0124912	0.0530081	0.138998	0.219438	0.169246	0.499087
200672_x_at	SPTBN1	0.496932	-0.144407	0.110584	0.176876	-0.132869	-0.320958	0.781368	0.128243	0.189137	0.046699	-0.025969	0.0453053	0.508723	-0.0808015	0.025969	-0.195684	-0.643297	-0.269664	0.135976	-0.487023	-0.236326	-0.650681	0.0410724	0.533347	-0.284175	-0.250005	-0.479327	0.77388	0.318198	-0.29656	0.269718	0.368602	0.180746	0.548417	-0.351031	0.443467	-0.219262	-0.250525	-0.311483	-0.396319	0.176693	-0.281274	0.0556655	-0.0410724	0.0298038	-0.00965166	0.0741935	0.450089
200673_at	LAPTM4A	0.344037	-0.401983	-0.181798	-0.275739	0.40086	0.724736	0.950076	0.86879	0.588982	-0.0951338	-0.273689	0.0131569	-0.174198	-0.419036	-0.329955	-0.0708313	0.286653	-0.103994	-0.0131559	0.0621567	0.224701	0.19686	0.511962	0.0959301	0.405284	-0.556949	-0.199855	1.0474	0.647172	-0.218869	0.765969	1.04256	0.00939083	-0.470112	-0.438145	-1.77332	0.00321865	-0.0992107	-0.114967	-0.0032196	0.154367	-0.0516243	-0.988283	0.170145	-0.143687	-0.357548	0.0161724	-0.132402
200674_s_at	RPL32	0.248025	-0.01474	0.0593872	0.225978	0.30657	-0.388443	-0.444733	-0.275666	-0.00449085	-0.160675	0.0168743	-0.0699854	-0.0438604	-0.0463247	0.00449085	0.0467062	-0.879432	0.380587	0.0305929	0.213028	-0.066267	0.0520191	-0.582942	0.303692	-0.226079	0.517619	0.55228	-0.196208	-0.0965881	-0.526313	-0.529322	0.037138	0.250242	-0.0511427	0.475879	-1.2168	-0.274041	0.118428	0.238652	0.157128	-0.0306892	0.562965	-0.126405	0.0306883	-0.0708752	0.0966015	-0.0211039	0
200675_at	CD81	-0.589571	-0.914542	-1.54446	-0.377068	-1.62244	0.507831	0.148431	-0.127472	-0.0052948	0.0816231	0.190232	0.0667105	0.0993538	0.120132	-0.0297585	-0.138303	-1.06161	0.197755	0.77179	0.0982618	-0.00333691	0.00333691	-0.282518	0.861309	0.591726	0.895893	2.17386	1.53783	0.937973	1.17049	-0.27334	0.0325508	-0.319145	-0.914038	-0.990472	-0.687441	-0.564965	-0.163666	-0.145436	-0.0325508	0.117042	0.942649	-0.433897	0.43582	0.478897	0.676551	0.611107	0.477843
200676_s_at	UBE2L3	-0.447841	-0.842699	-1.2066	-1.04129	-0.187428	1.02317	0.360322	0.791839	-0.384251	0.250538	0.570345	0.0674624	-0.067462	-0.127275	-0.347978	-0.316272	-0.945689	0.39437	0.473571	0.249781	0.339655	0.362158	1.08451	0.0355396	0.707428	-0.455126	-0.0982842	0.7547	0.863522	-0.18826	-0.323688	0.16661	-0.64767	-0.618103	-0.143267	-0.11843	0.326371	-0.0312066	0.0365825	0.0312066	0.168174	-0.628008	-1.02552	0.54772	0.35759	0.562651	0	0.030869
200677_at	PTTG1IP	0.0471478	-1.03539	-0.595965	-0.280269	-0.432086	-0.294483	0.476166	0.0844212	-0.985788	0.0454416	-0.110992	0.0494757	0.124255	0.119489	0.16877	0.206438	-0.960024	0.0740528	0.163459	-0.313	-0.167007	-0.0454426	-0.310675	0.283831	0.529968	0.372354	0.866158	0.42763	0.553042	-0.785141	-0.274758	0.461926	-0.390664	-0.404743	0.0229988	-1.85373	-0.249839	0.249771	0.11516	-0.0229988	0.192176	-0.251125	-1.16768	-0.366071	0.182707	0	0.163994	0.254439
200678_x_at	GRN	0.486355	-0.939672	-0.751125	0.0098381	0.980651	1.08701	0.683022	-0.102419	0.328405	-0.14994	0.291362	-0.0820694	-0.0098381	-0.224079	-0.145147	-0.166864	-1.61943	0.884457	1.15231	0.0688753	0.402028	-0.0581398	0.255336	0.548675	0.470162	0.554014	1.39882	0.779929	0.567967	0.411254	-0.89569	-1.17395	-0.111369	-0.674171	0.224509	-0.478612	-0.16664	-0.25504	-0.0138111	0.0138111	-0.0326967	-1.36144	-0.0451355	0.176614	0.0187235	0.429441	0.049777	0.249184
200679_x_at	HMGB1	-0.0110893	-1.61827	0.273812	0.147268	0.0481997	-1.31821	0.341294	0.592117	-0.0779486	1.04626	0.624952	0.800541	0.0117064	-0.595202	-0.555075	-0.996446	-0.744837	0.0110893	0.223926	-0.0272865	-0.0301247	-0.423202	-0.0334721	0.0334721	-0.591128	0.888432	0.289173	0.731393	0.624617	0.251841	-0.25477	-0.329714	1.29876	-0.151956	0.724319	-0.217942	-0.546748	-0.214005	0.587332	-0.785285	-0.401308	-0.384768	0.365868	0.815916	1.07447	0.651772	0.88845	0.12993
200680_x_at	HMGB1	-0.0558739	0.287627	0.562914	0.390471	-0.658623	-0.254087	0.242568	-0.0326042	0.160794	0.382113	-0.0172787	0.0172787	0.206291	0.170827	-0.120113	0.085515	0.773917	-0.161303	-0.0661011	-0.346322	-0.122581	-0.542068	-0.0585346	0.00647926	0.202106	0.127527	0.390629	0.102755	-0.00647926	-0.418709	0.890608	0.696469	0.0634346	0.419654	-0.26662	-1.04298	-0.490055	-0.390959	-0.333074	-0.61924	-0.497938	0.325204	0.171555	-0.0306444	0.644574	0	0.044363	0.267913
200681_at	GLO1	-0.259676	-0.400119	-1.21725	-0.620811	-0.195308	-0.0270834	0.505491	0.593766	-0.0986033	0.000206	-0.180184	-0.0710773	0.0487738	-0.000206	0.0621128	0.335438	0.234304	0.138751	0.0816641	0.138338	-0.0282631	0.303391	-0.121489	-0.224151	0.0883312	-0.54265	-0.0470591	0.206318	0.246849	-0.594276	-0.622071	0.139112	0.0315666	-0.708735	-0.0584373	-2.19012	-0.0315666	0.534164	0.192831	0.537037	0.245496	0.710678	-1.62338	0.534918	-0.150469	-0.213887	-0.137491	-0.0752735
200682_s_at	UBE2L3	0.444839	-0.491579	-0.637106	-0.0158901	0.967517	-0.544915	-0.515558	-0.790924	1.17041	0.495197	0.548113	-0.0509281	-0.211528	-0.316701	-0.250686	0.0158901	-0.425906	0.356193	0.409013	0.647234	0.690377	0.663461	0.269608	0.884802	0.192437	0.341543	-0.491722	-0.382368	-0.750573	0.657681	-0.597808	0.0861177	0.768376	-0.767828	0.224028	-1.85554	-0.0610743	0.0610743	0.103506	-0.322807	-0.169015	-0.26103	-1.60351	0.763491	0.490694	0.5612	-0.0706682	-0.234076
200683_s_at	UBE2L3	0.0267181	-1.0854	-0.998868	-0.384315	0.307876	-0.423155	-0.301303	-0.118042	-0.171202	-0.177284	-0.0267181	0.119109	0.114748	-0.0915937	0.307489	0.222784	-1.77648	0.342203	0.514491	0.471619	0.371487	0.507989	0.0647869	0.067565	0.439352	0.120177	-0.407204	-0.353961	-0.157309	-0.0133085	-0.773517	-0.243353	0.016367	-1.24284	0.00700474	-1.37838	-0.00700474	0.111364	0.118889	0.414492	0.205695	-0.238667	-2.21847	0.100327	-0.281679	-0.0945902	0	0.0432644
200684_s_at	UBE2L3	0.0866852	-0.566543	-0.333315	-0.370732	-0.0581579	0.479658	0.165857	0.244862	-0.240075	-0.0753212	0.0480027	-0.0180311	-0.0162239	0.0162244	-0.147285	-0.0909476	-0.218253	0.0246725	0.421826	0.118139	0.298877	0.309929	0.400695	-0.0860529	0.181998	0.113024	-0.556446	-0.00471211	0.119317	-0.220696	0.039072	-0.0266829	-0.44337	-0.312206	0.0960484	-0.985866	-0.000989	-0.149204	-0.0382175	0.0296164	0.0646906	0.0681667	0.000989	0.0516634	-0.124862	-0.0631762	-0.168554	-0.0268397
200685_at	SRSF11	-0.288294	0.828917	-0.0106368	-0.912804	-1.14991	-0.660766	-0.464353	-0.145203	-0.22599	0.1745	0.224977	0.346306	0.236163	0.197083	-0.126196	0.453589	0.755685	0.0483255	0.0106368	-0.332846	-0.144593	0.353237	0.343505	-0.64783	-0.0371618	-0.118243	-0.772536	0.0169301	0.334559	0.165644	0.623184	0.925909	-0.223174	-0.447781	-0.0169301	-1.13702	0.42053	0.347342	-0.170898	0.0294113	-0.0831046	0.275431	-1.38579	0.0444598	0.346167	0.473112	0.560132	0.399334
200686_s_at	SRSF11	-0.0459604	0.406641	0.571104	-0.0162334	-0.412051	-0.103757	0.705937	0.758354	-0.141151	-0.156396	0.177507	0.0247898	0.148633	-0.0223007	-0.176245	0.233126	0.214963	-0.0896921	-0.201885	-0.314871	0.0162334	0.328439	-0.0158539	-0.498321	0.06357	-0.047308	0.286227	0.367313	0.285728	-0.64337	0.746231	0.910468	-0.620873	0.284955	0.507905	-1.38389	-0.0104961	-0.0378523	0.0104961	-0.0929041	0.170649	0.666075	-0.628668	-0.0663404	-0.207279	0.14467	-0.0507727	0.0961161
200687_s_at	SF3B3	0.194372	-0.925283	-0.385484	0.163481	0.278307	0.103611	-0.0303183	-0.391657	0.269869	0.0484133	0.0381117	-0.181692	-0.172417	-0.421004	-0.4648	-0.206123	-1.0233	-0.369917	0.0303183	0.0727816	0.0310965	0.0636082	0.43895	0.284189	0.0168648	-0.101859	0.905102	0.0839424	-0.203253	0.232732	-0.0532608	-0.266018	-1.16917	0.153346	-0.319946	0.365998	-0.0702772	-0.236488	0.0652294	-0.186036	-0.433332	-0.0168648	0.309196	0.124346	0.231895	0.396542	-0.0391464	-0.146757
200688_at	SF3B3	-0.0969	0.470749	0.369519	-0.345177	0.0847888	-0.219047	-0.51519	-0.864592	-0.0356245	0.0959744	0.0092988	-0.0092988	0.313749	0.0963459	0.157996	0.230087	-0.20191	0.129677	-0.214291	-0.267534	0.104707	-0.180293	-0.489127	-4.39e-05	0.00264358	0.0211406	0.641967	0.144524	-0.4696	-0.0566726	-0.0800209	0.280943	-0.141444	-0.21526	0.141037	0.0354409	-0.243955	-0.0333428	0.0208974	0.135026	-0.259578	4.39e-05	0.493416	-0.0314059	0.0831628	0	0.130976	0.274285
200690_at	HSPA9	0.0126328	0.476292	-0.817726	-1.13782	0.6189	0.139162	0.543302	0.151527	-0.279844	-0.055809	-0.253347	-0.0345049	-0.0227094	-0.46391	-0.497768	-0.0126328	1.36198	0.0754638	0.163724	-0.145596	0.372481	0.11129	1.00456	-0.923552	0.0869875	-1.22217	-1.40647	0.182235	-0.156631	-0.540813	1.01653	0.395214	6.1e-05	-6.1e-05	0.368387	-0.783281	0.132151	0.472036	-0.586941	-0.0122166	-0.0501518	0.361728	-0.344393	0.333565	-0.215951	-0.45329	-0.144506	-0.248194
200691_s_at	HSPA9	0.0107403	-0.342457	-0.939151	-0.370216	0.352891	0.924664	0.554443	0.0886621	-0.14806	0.119942	-0.0107403	-0.333155	-0.124217	0.0407543	0.144898	-0.048955	1.34809	-0.113961	-0.202626	-0.119705	0.0734673	0.215324	0.640576	-0.562654	0.494119	-1.25473	-1.16297	-0.0156174	-0.0248175	-0.949737	0.292656	-0.0925427	-0.0674686	0.0156174	0.214476	-1.59794	0.238889	0.262693	0.367162	0.372277	0.453981	-0.892369	-0.357657	0.210442	0	-0.130866	-0.472232	-0.297761
200692_s_at	HSPA9	0.0101318	-2.35773	-0.920711	-0.904282	0.934782	1.11131	2.39338	2.16966	-0.487502	0.442432	-0.0343885	0.0736446	-0.0479202	-0.0935745	-0.114697	-0.694399	0.936767	0.401758	0.397085	-0.148122	0.435617	-0.0101318	1.02303	-1.02221	0.143726	-2.0209	-0.922179	1.47038	1.45831	-1.5083	0.0510111	0.39332	-0.353439	-1.86594	0.205079	-2.01907	-0.171911	-0.0510111	0.695109	0.167233	0.568971	-1.91676	-0.628263	0.385271	0.124043	-0.324614	-0.164047	-0.387829
200693_at	YWHAQ	-0.155294	-0.00426102	-0.573195	-0.517427	-0.48578	0.0619335	0.83225	0.756085	-0.790419	-0.0243053	0.167084	0.124646	-0.160622	0.0808678	-0.195132	-0.0732927	0.511666	0.00319958	0.32576	-0.00319958	0.225412	0.278973	0.171242	0.00450134	0.446278	-0.0827141	0.150463	0.903156	0.54901	-1.21572	-0.214791	-0.00450134	0.032074	-0.651768	0.0223598	-1.68151	-0.517529	-0.0491018	0.0809078	0.14668	-0.00646401	0.307848	-0.0885105	-0.353943	0.00116444	0.169517	0.106732	-0.192134
200694_s_at	DDX24	-0.226899	-0.536802	-0.826073	-0.376302	-0.566662	-0.10064	-0.00388432	-0.120562	0.314124	0.158821	0.292297	0.02316	0.117704	0.108707	-0.060956	0.0670147	-0.329478	0.204905	0.260757	-0.096633	0.102122	0.00388432	0.419087	0.00451279	0.00406456	0.00621223	-0.160244	0.150085	-0.00406456	0.0617828	0.234977	0.0129948	-0.265031	0.0129547	-0.130505	-1.163	-0.147645	-0.398724	-0.174242	-0.244305	-0.0760221	-0.0698452	0.298959	0.590342	0.233165	0.447594	0.0463343	0.207429
200695_at	PPP2R1A	-0.113341	-1.0996	-1.37234	-0.384987	0.455797	1.7858	1.39191	1.15339	0.282327	-0.0399227	0.0399227	-0.296937	-0.451263	-0.25002	-0.215692	-0.835177	-1.49193	0.84549	0.533647	0.663528	0.671311	0.187981	0.441719	0.0400653	0.498295	0.0373116	0.939099	1.5378	1.02503	0.616782	-0.84309	-0.944368	0.145417	-1.38423	-0.160642	-0.584311	-0.321886	-0.672985	0.0462704	-0.0373116	-0.183996	-0.68231	-0.862553	0.214087	0.026516	0.177289	-0.153971	-0.295575
200696_s_at	GSN	-1.32736	-1.7196	-1.18142	-0.264549	-1.02991	-0.0147705	-0.159621	0.0188856	0.873375	-0.779435	-0.445833	0.0147705	-0.599647	0.247359	0.150281	-0.381229	1.55087	0.780869	1.25728	0.0734215	1.09753	0.557924	-0.0274887	-0.974162	0.109373	-0.37725	-0.0317049	-0.236729	0.625294	1.13635	-0.484256	0.761807	0.173958	-0.455961	-0.923819	-2.32986	0.0668097	-0.299067	0.0274887	0.727093	1.2845	-1.18397	0.813225	1.2728	-0.648709	-0.416718	0	-0.503722
200697_at	HK1	0.0391436	-0.172244	0.143463	0.465278	-1.20782	-0.755618	-0.186721	-0.821552	0.159677	-0.245591	0.663989	0.535428	0.119422	0.43223	0.411709	-0.0535326	-0.923346	0.146669	0.439285	-0.144426	-0.0554171	-0.0391436	-0.0500669	0.907842	0.113136	0.835983	1.35331	-0.117768	-0.716599	0.509378	-0.34878	0.297617	-0.290853	0.684949	-1.06458	-0.533204	-0.471984	-0.322877	-0.0867147	-0.183321	0.205654	0.978725	0.532746	0.0500669	-0.130331	0.855402	0.740075	0.378388
200698_at	KDELR2	0.334334	0.00610256	0.800388	-0.818371	0.623195	0.549577	0.964692	1.34019	-0.299268	-0.286988	-0.257483	-0.517071	-0.00277901	0.152872	0.00277901	0.289976	-0.832027	-0.25133	0.206749	-0.538601	-0.577719	-0.250877	0.668671	-0.3902	0.40168	0.0162354	1.17803	0.998201	1.0728	-1.28685	-0.0162354	0.882998	0.0465946	-0.291108	-0.284493	-1.44402	-0.0581923	-0.166495	0.087698	0.289913	0.221741	-0.768369	-0.0895224	-0.501136	-0.206049	-0.314086	-0.486874	0.0134506
200699_at	KDELR2	0.501874	-0.446568	-0.276168	-0.372431	-0.0251741	0.884243	0.384362	0.503959	-0.69234	0.00772095	-0.0273466	0.0974255	-0.0237837	0.0535717	-0.0387936	-0.217556	0.448093	0.162234	0.0993109	0.068655	-0.0547638	-0.00772095	0.47513	0.0704107	0.857595	-0.383636	0.376652	0.473353	0.498484	-0.837011	0.152267	0.0660858	-0.0902576	-0.725584	-0.298229	-1.752	0.0201797	-0.0234442	-0.0201797	0.358346	0.473253	-1.15583	-0.24211	-0.106852	0.0179157	-0.029789	0.134545	-0.00130463
200700_s_at	KDELR2	0.502332	-0.324239	0.824152	0.0136232	0.694521	0.102849	0.741209	0.798982	-0.742825	-0.177624	-0.0977659	0.0136471	-0.988879	0.195844	0.333966	-0.0136232	0.1012	-0.695952	-0.199553	-0.754942	-0.183236	-0.350121	-0.00437069	0.736368	0.820568	0.99447	1.29703	0.628192	0.623762	-0.864265	0.00437069	1.5391	-0.477135	-0.8145	-0.0511122	-1.24646	-0.148988	0.268714	-0.763967	0.321884	0.332577	-0.403339	-2.02027	-0.402726	0	0.0460157	0.211918	-0.810019
200701_at	NPC2	1.10017	-0.228047	-0.281728	-0.0384865	0.451135	0.897864	0.941796	0.539197	0.956586	0.614994	0.269983	-0.140179	-0.0771589	-0.732635	-0.514165	-0.456416	1.08072	-0.165913	-0.216253	0.0384865	0.0791101	-0.0923719	0.396322	0.286551	0.162724	0.415381	-0.147171	0.440759	0.225707	0.081892	0.269247	0.562326	-0.313637	-0.400781	0.0912218	-1.31931	-0.159989	-0.081892	-0.423471	-0.581208	-0.43057	-0.251017	-0.469039	0.740277	0.703753	0.349202	-0.0793629	-0.0214653
200702_s_at	DDX24	0.00682259	-0.793351	-0.190636	0.130167	-0.0256386	-0.931073	0.0203848	0.128822	-0.812756	0.193605	-0.0671101	0.329517	0.0668316	-0.377695	-0.00682259	-1.39736	0.469762	-0.158106	0.0197086	-0.420956	0.491927	0.0283327	-0.20426	-0.100764	-0.414546	0.333642	0.880837	0.378078	0.361863	-0.541844	0.0736227	-0.0571718	0.639626	0.517987	-0.202463	0.0571718	-0.0896044	-0.620257	0.135362	-0.496667	-0.157152	0.498302	1.45955	-0.244058	0.274641	-0.00094	0.522482	0.223056
200703_at	DYNLL1	-0.169642	0.424672	-0.639137	-0.463967	-0.30969	0.151324	-0.229251	-0.132204	0.376111	-0.237529	0.473771	-0.151439	-0.00396824	-0.0556688	-0.431242	0.00396824	0.157839	0.0679092	0.548521	0.705411	0.270132	0.609499	0.109518	0.404654	0.159386	0.550331	-0.170496	0.545792	0.126442	0.283246	-0.298381	0.334105	-0.109518	-0.473925	0.431067	-1.24782	-0.317499	-0.320873	-0.350134	-0.731081	-0.698559	0.517359	-0.55055	1.16594	-0.100327	0.764448	0.117982	0.0632744
200704_at	LITAF	-0.0236464	-0.779377	-0.469286	0.195509	-0.897781	-0.521362	0.417733	-0.00259209	-1.83347	-0.460278	0.0779953	0.205435	-0.0291634	0.0758095	0.540606	0.128811	0.00259209	0.0681133	0.145136	0.0267334	-0.0837898	-0.139145	-0.940911	-0.020503	0.202024	0.103487	1.14248	0.183403	-0.294387	-1.9884	-1.08737	0.0676622	-0.0691586	0.020503	-0.394661	-2.70712	-1.06706	0.204223	0.128749	0.0323124	0.850271	1.07889	-1.68639	-1.1571	-0.452337	0.0267715	0.14604	-0.0936375
200706_s_at	LITAF	0.606101	-0.768624	-0.0136003	0.0576687	-0.920724	0.782114	0.748683	0.0136003	0.20692	-0.168777	0.403941	-0.200438	-0.248185	-0.299844	0.0889749	-0.232635	-0.266347	0.0170164	0.212838	0.0315065	-0.129855	-0.0386114	-0.0978203	0.319263	0.601837	0.210713	0.638974	0.44396	0.0797091	-0.0576057	0.0576057	0.725677	-0.715013	-0.415421	-0.19266	-1.5969	-0.723234	-0.109685	-0.397133	-0.382565	0.425083	1.56879	-0.761329	0.163771	-0.114763	0.585596	-0.110784	-0.158821
200707_at	PRKCSH	-0.0878172	-1.64594	-1.29596	-0.518256	0.432891	0.220609	-0.517363	-0.0731487	-0.432383	-0.0158977	0.062212	0.0158977	0.0868163	0.055326	0.0861044	-0.537083	-1.72613	0.649124	1.26088	0.784451	0.314978	-0.0366774	-0.341912	-0.14136	0.0220981	0.207012	0.797606	0.234284	-0.0220976	-0.735556	-0.817829	-1.32498	0.266874	-0.305728	0.0630035	-0.198633	0.0623479	-0.346982	0.714835	-0.0285687	0.10299	-0.847284	0.487234	0.0295477	0.0774493	0.0742388	0.141544	0.174244
200708_at	GOT2	0.0860681	-0.193099	-1.36501	-0.590191	0.445334	1.19788	0.572823	0.690617	-0.298601	-0.0760555	0.194414	-0.462209	-0.147953	-0.183774	0.0104485	-0.0104485	-0.230124	0.271903	0.0950222	-0.256081	0.109324	0.0606728	0.430286	-0.328487	0.634164	-0.80088	-0.531498	0.734894	0.559085	-0.905066	-0.379751	-0.160993	-0.431168	-0.625683	0.189253	-1.27698	-0.123888	0.207123	0.488924	0.67517	0.395364	0.123887	-0.387395	0.169424	-0.0357819	0.131357	-0.513664	-0.138353
200710_at	ACADVL	0.584113	-0.583504	-1.08113	-0.589506	1.88192	0.951649	0.366623	0.511225	0.975125	0.0479555	-0.0479555	-0.671252	-0.72566	-0.895325	-0.74399	-1.36172	-0.331703	0.869404	-0.186297	0.329821	0.72703	0.338088	0.88104	0.498986	0.50746	-0.296569	-1.10109	0.121362	0.405265	0.612384	0.0163364	-0.0163364	-0.0531788	-0.33468	0.0959339	-1.32988	0.139039	-1.02899	-0.372194	-0.388767	-0.306669	-0.635715	0.402153	1.01652	0.0379581	-0.0986328	-0.660187	-0.608313
200711_s_at	SKP1	-0.233492	0.438136	-0.137249	-0.441282	-0.213209	-0.0469894	0.12267	0.266175	-0.880098	0.044878	0.0104475	0.214161	0.127934	0.200684	-0.0104485	0.180231	0.623949	-0.0890789	-0.1131	-0.0248356	-0.248804	0.0350447	0.101507	-0.344381	-0.290064	-1.00262	-0.378015	0.162522	0.00384235	-1.35064	0.1497	0.238928	0.213509	0.049386	0.222405	-0.977524	-0.238372	0.290859	-0.00384331	0.157494	-0.0341425	0.542517	-0.312496	-0.352624	0.0531616	0.0636835	0.179852	0.108734
200712_s_at	MAPRE1	-0.413914	-1.73217	-1.82364	-0.220279	0.285279	-0.607743	0.417595	0.181443	-0.117579	-0.351948	0.0756292	-0.165891	6.01e-05	0.0589609	-0.0637426	-0.104239	0.744947	-6.01e-05	0.480492	0.667909	0.630174	0.781737	0.916968	0.0596199	0.526905	-0.267984	-0.246363	0.77949	0.527337	-0.203237	-0.00478458	0.973077	0.666339	-0.690349	-0.771054	-1.50608	0.00478458	-0.0522528	0.0362244	0.0999451	-0.0286856	-0.471898	-1.58036	0.0332279	-0.159602	0.364012	0	0.074564
200713_s_at	MAPRE1	-0.146563	-0.399939	0.216663	0.210353	-0.888513	0.0626478	0.487985	-0.189034	-0.367533	-0.0258236	0.0258236	0.257996	0.11872	0.448581	0.451683	0.417759	0.320532	-0.583921	-0.213559	-0.786092	-0.250748	-0.441511	0.649769	-0.427689	0.755797	0.0781975	0.06394	0.536074	-0.102045	-0.49467	0.579455	0.983841	-0.0454903	-0.325874	-0.826392	-1.64393	-0.00741291	0.164311	0.00741291	0.0847034	0.179852	-0.499764	-1.78924	-0.275078	0.0285368	0	0.292418	0.22867
200714_x_at	OS9	0.252953	-0.401682	0.00527096	-0.505119	-0.196369	0.1022	0.0789566	0.0947981	0.190006	0.367201	0.325407	0.257942	0.0559721	0.195755	-0.0700874	-0.0389061	-0.71851	-0.0148144	-0.0098381	-0.369469	-0.00527096	-0.472435	-0.0576773	0.28075	0.198016	-0.0856276	0.165953	-0.114723	0.0435543	-0.0905409	-0.00261021	-0.706609	-0.226203	0.10076	0.232781	-0.0639858	-0.220406	0.0159721	-0.0143337	0.0150576	0.378058	-0.209729	0.663694	0.00261021	0.232304	0.228077	0.302038	-0.0927506
200717_x_at	RPL7	0.179964	-0.0606308	-0.43783	0.142745	-0.0364218	0.0820465	0.266381	0.192012	-0.0464649	-0.0244369	0.0494289	-0.0509405	-0.0651035	-0.00123596	-0.0892334	-0.0045433	-0.132494	0.117527	0.032526	0.0236435	0.0335455	0.00123692	0.0509806	0.0198927	0.0472755	0.0559311	0.0784845	0.147776	0.0738211	-0.773676	-0.316137	-0.0198936	0.235548	-0.0796928	0.117175	-2.02093	-0.318806	-0.110584	-0.0745373	-0.151842	-0.199118	0.143543	-0.758863	0.0405464	-0.012001	0.151733	-0.106681	0
200718_s_at	SKP1	-0.213442	-0.00743771	-0.211979	-0.486516	-0.0671597	-0.0678587	-0.0514212	-0.000783	-0.541739	-0.0363541	0.0912094	0.0816212	0.0125847	0.016984	-0.00586128	0.147772	0.178496	0.000783	0.113752	0.112473	0.0937195	0.126645	0.237486	0.0197725	0.0428915	-0.0197725	0.0270109	0.141788	0.123761	-0.980376	0.206211	0.2576	0.0320673	-0.17176	0.0478401	-1.60965	-0.204821	-0.0366869	-0.0853023	-0.0620813	-0.108338	0.427411	-0.365444	-0.148044	-0.0131598	0.126492	0.103612	0.0713673
200719_at	SKP1	-0.0314646	0.962579	-0.361813	-1.05797	-0.696167	-0.275074	0.0755281	-0.209034	-1.13282	0.48974	0.639983	0.767137	0.453814	0.609857	0.318733	0.75564	1.02098	-0.101793	-0.520383	-0.323697	0.0314646	-0.710478	0.0378437	-0.649345	-0.552744	-1.3476	-1.33689	-0.241853	-0.404005	-1.33919	0.0935783	0.0153961	-0.200465	-0.442022	0.353295	0.0203886	0.166562	0.655034	0.207161	0.400426	-0.0153961	0.0327682	0.223272	-0.30127	0.175466	0.324381	0.399727	0.172026
200720_s_at	ACTR1A	0.33351	-0.475553	0.188698	-0.2648	-0.120384	0.230289	-0.00175524	0.177761	1.02493	-0.078402	0.103794	-0.0797586	-0.309671	-0.120287	-0.32971	0.00175524	0.341415	0.00181866	0.910061	0.35919	-0.140827	-0.0806813	0.206914	0.95454	0.628025	0.764951	0.592371	0.160594	0.17647	1.24983	-0.275477	0.225426	-0.379909	-0.378561	-0.107537	-0.203923	-0.125314	-0.226987	-0.346296	-0.378912	-0.190976	0.107537	-0.157086	0.577555	0.0546532	0.113859	0.0993085	-0.217232
200721_s_at	ACTR1A	0.537982	-0.688941	-0.412513	-0.0618095	-0.211396	0.355723	0.872553	0.706376	0.330867	0.0560808	0.123059	0.137199	-0.313094	-0.0560803	-0.155951	-0.239124	-0.966001	0.205677	0.388989	0.128264	-0.142483	-0.455196	0.636435	0.0515924	-0.0920916	0.29864	0.191739	1.2717	1.08187	0.594868	-0.214574	-0.530641	0.091445	0.272821	-0.151843	-0.445086	-0.140098	-0.226474	-0.0515924	-0.432448	-0.315576	-0.132237	0.459021	0.403584	0.308628	0.481184	0.39109	-0.122745
200722_s_at	CAPRIN1	-0.280572	0.427696	-0.118861	0.450042	0.0649543	-0.449824	0.705307	0.393665	-0.0786328	-0.0699835	-0.268619	-0.316605	-0.0284963	0.0284963	-0.166664	0.175054	0.135193	-0.26826	-0.161697	0.102092	0.365984	0.184721	0.0252733	-0.433424	0.0688124	0.0529051	0.141076	0.336192	-0.0405865	0.144081	-0.0252728	-0.125866	-0.356977	-0.0361586	-0.177855	0.498153	0.408456	0.0977468	-0.31706	-0.22061	-0.47921	0.0496902	-0.562068	0.191329	0.0513139	-0.228298	-0.359318	0.0395179
200723_s_at	CAPRIN1	-0.420214	-1.7742	-1.48735	-0.453567	-0.501689	-0.058073	0.345718	0.304397	-1.01209	-0.0269775	-0.0427179	0.294029	0.192657	0.210446	0.0269775	0.197326	-0.082201	0.173753	0.903073	-0.07127	0.324661	0.0435753	0.218809	-0.444047	0.92973	-0.262059	0.365246	1.26468	0.298691	-0.595379	0.419497	0.520224	-0.168285	-1.19896	-0.561757	-2.37374	-0.619307	0.299291	0.0149784	0.271349	0.0112419	-0.338841	-2.49075	-0.0112419	0.123888	0.106055	0.393236	0.306223
200726_at	PPP1CC	-0.254147	0.0792255	-0.379583	0.452591	-0.415415	-0.231657	0.146737	0.0428028	-0.90288	-0.221521	-0.428133	0.247443	0.196552	0.255936	0.103907	0.371025	0.259841	-0.531767	-0.250483	-0.0428028	-0.0991802	0.0981846	-0.00489903	-0.374254	0.732361	-0.0991077	0.472373	0.204239	0.00489903	-1.03421	0.314135	0.88004	0.511322	-0.585653	-0.319245	-2.18792	0.127279	0.174848	-0.0327673	0.346755	0.233226	-0.145542	-2.38757	-0.546453	-0.144301	-0.386324	0.327003	0.283614
200727_s_at	ACTR2	1.25732	-0.306416	1.10754	1.00123	-0.549291	-0.744957	0.810703	-0.0622997	-0.97041	1.07363	0.178994	1.14662	0.104304	0.193175	-0.393191	-0.716872	-0.643192	0.0622997	0.336063	-1.80269	-0.88907	-0.570142	-0.708424	0.0640416	0.512847	0.37951	-0.033237	0.279967	-0.472394	-1.55062	0.780542	0.356264	-0.460986	0.00232935	-0.195561	0.471724	0.105041	-0.00232935	0.626862	-0.263497	-0.383791	-1.12368	0.087955	-0.856775	0.827243	0	1.05385	0.116715
200728_at	ACTR2	-0.0877571	-3.23301	-0.540742	0.24653	-0.134348	0.206665	2.05009	2.07949	-1.40937	-0.0911322	-0.683477	0.35355	-0.272364	-0.0454197	0.222901	0.167843	0.288252	-0.516573	0.252106	-0.359532	0.31525	0.0454197	0.785464	-0.21388	0.931876	-0.440389	2.13702	2.19701	1.80607	-1.74948	0.635771	1.87917	-0.05653	-0.647766	-0.871137	-2.45853	-0.542888	0.320216	0.05653	0.11415	0.296479	-0.100938	-1.56882	-1.21148	-0.0351067	-0.638346	0.486588	-0.157589
200729_s_at	ACTR2	-0.0398912	-1.04687	0.853044	0.814856	-1.65696	-2.11445	1.15659	1.45747	0.432972	-1.16137	-0.0667534	0.0928507	0.103759	-0.0212326	0.506451	0.830738	-0.226076	-0.332481	0.311998	-2.03874	-0.441635	0.0212326	-1.17445	-0.445854	-0.253418	0.729239	0.721222	0.963038	0.920401	0.01898	-0.0347824	0.82562	0.0029335	-0.748829	0.110894	-0.482222	-0.367781	-0.0029335	-0.220413	-0.208815	0.207842	0.223948	-0.957579	0.309252	-1.26099	-0.0881405	0.097971	0.200726
200730_s_at	PTP4A1	-0.227938	0.392601	-0.479939	-0.167984	-0.0097065	0.115617	1.64792	0.225005	0.571601	-0.0771704	0.0097065	0.0337849	0.0365605	-0.183775	-0.217075	-0.362015	0.452706	0.194947	-0.332163	-0.240818	0.0768042	-0.029449	0.449477	-0.452977	-0.133275	-0.85036	-0.748085	1.19953	0.316219	-0.265993	1.473	1.37453	-0.480541	-0.0783625	-0.34504	-0.0870762	0.0260706	0.491683	0.262048	0.036036	-0.0260706	0.0365357	-0.168842	0.239603	-0.224041	-0.142442	-0.339441	0
200731_s_at	PTP4A1	-0.314373	0.34098	-0.0578647	-0.929819	-0.0896196	-0.0527792	1.21607	0.573699	0.491796	-0.0317488	-0.0441852	0.229836	0.00661087	-0.390842	0.432681	-0.00661039	0.28901	0.221882	-0.362501	-0.301491	0.26158	0.0971785	0.0742245	-1.30346	-0.351161	-1.55416	-0.91026	0.959201	0.0197058	-0.556378	-0.052372	0.0265112	-0.780497	0.0775681	-0.597407	-0.674334	0.446772	1.28418	0.196173	-0.0197058	0.529081	0.607748	0.208313	-0.283262	-0.211796	-0.158055	0.0493641	-0.164295
200732_s_at	PTP4A1	0.0565023	-1.17352	-1.03089	-0.668138	-0.283257	0.211655	1.14878	0.570733	-0.235585	0.404186	-0.0565023	0.322849	-0.136568	0.0601339	0.352391	0.10089	0.859325	-0.147798	-0.522354	-0.422915	0.0645561	-0.11324	0.420797	-0.68782	0.0174999	-1.67465	-0.511587	0.670578	0.146755	-1.39643	0.392253	0.223583	-0.69195	-0.538298	-0.604306	-1.56393	0.487671	0.918072	0.209573	0.367661	0.495869	-0.676885	-1.43588	-0.0174999	0.280621	-0.10638	0.19197	-0.264473
200733_s_at	PTP4A1	0.376563	0.688478	-0.20756	-0.503036	0.246734	0.219761	0.54428	0.0296874	1.00821	-0.322147	0.325492	0.284382	-0.527923	-0.667458	-0.24647	-0.158534	1.10363	-0.0296879	-0.337654	-0.0546694	-0.177492	0.139835	0.0699472	-0.264802	-0.59833	-1.45317	-0.572954	0.0743742	-0.203624	-0.199839	0.834134	0.76883	-0.307884	0.783528	-0.901652	-1.19026	-0.0699472	0.182705	0.114742	-0.228502	0.141212	1.25477	0.522633	0.237041	-0.52077	0.151754	0.0697117	-0.772543
200734_s_at	ARF3	0.398344	0.591993	-0.0375414	-0.491258	0.727403	-0.181239	-1.9121	-1.67746	0.138809	0.231682	0.521206	-0.0818424	0.107229	-0.138636	-0.125736	0.0375414	-0.785517	-0.364341	-0.774205	0.708518	0.247519	0.47556	0.0134583	0.0271502	0.126679	-0.41608	-1.51217	-1.88569	-1.73837	-1.37544	0.68818	-1.26841	-0.149565	0.147159	0.347295	0.0773706	-0.196147	-0.0134583	0.361102	0.149323	-0.0347052	-0.259633	1.40835	0.335259	0.0333433	0.335833	-0.286284	0
200735_x_at	NACA	0.0725699	-1.53609	-0.847161	0.0315142	0.238948	0.267875	0.545089	0.758799	-0.074481	-0.00959587	0.010397	-0.860718	-0.852299	-1.20504	-0.850323	-0.789001	-0.178901	0.165371	-0.13166	0.267023	0.167585	0.00959587	0.718265	0.513474	0.282832	0.426906	0.339462	0.941522	0.730454	-0.0925427	-0.329912	0.0449629	0.566065	-0.471889	0.666096	-2.88546	-0.271971	-0.520786	-0.229192	-0.722056	-0.690196	-0.0449629	-0.282177	0.571447	0.390181	0.612125	-0.292823	-0.321797
200736_s_at	GPX1	1.13439	-0.197501	-0.472346	0.505299	1.04181	0.937656	0.754431	0.613228	1.48284	-0.0889835	0.0889835	-1.08971	-1.16941	-1.05665	-0.983521	-1.29685	-1.92959	0.361871	0.401528	0.613878	-0.256936	-0.456882	-0.143124	0.971734	0.401397	1.1102	-0.341655	0.418994	0.495865	0.646537	0.0722199	0.295304	-0.0722199	-0.11119	0.642823	-1.93955	-0.505655	-0.899157	-1.10116	-1.3469	-1.30542	0.287498	-0.277611	0.764936	0.0603609	0.323392	-0.82972	-0.940863
200737_at	PGK1	-0.130913	-2.0927	-1.54825	-0.157104	0.0135889	0.93398	1.92305	1.86674	0.668292	-0.0135889	-0.540313	-0.384248	-0.442662	-0.33064	-0.274226	-0.707419	1.1605	0.202876	0.207496	0.225966	0.353587	0.222514	0.584623	-0.518459	0.945401	-0.544133	-0.190958	1.25874	1.37848	-0.0922155	0.0368395	0.986315	0.082819	-1.60748	-0.602915	-3.09119	0.147234	-0.150936	-0.0368395	0.24621	0.297062	-1.37223	-1.7752	0.694538	-0.177062	-0.772558	-0.523517	-0.555677
200738_s_at	PGK1	0.0687065	-0.581617	-1.29217	-0.540266	0.078949	0.624007	0.799203	0.85123	0.268644	-0.0305796	-0.180438	-0.223687	0.0222836	-0.139493	-0.086093	-0.194095	0.357035	-0.0222845	-0.193947	0.263422	0.186241	0.146776	0.347013	-0.118959	0.278849	-0.369065	0.190719	0.749327	0.541817	-0.553251	-0.110958	0.358852	-0.108759	-0.40472	0.0404129	-1.98829	-0.052496	-0.0316067	0.0724583	0.0724583	-0.00492287	0.00492287	-1.28262	0.571841	-0.0600004	-0.292863	-0.264326	-0.0600004
200739_s_at	SUMO3	0.00704575	0.143206	0.151241	-0.0480652	0.280726	0.749916	0.385812	0.593689	0.78427	-0.410191	-0.00704527	-0.483747	-0.294369	-0.469428	-0.367002	-0.863174	-0.67612	-0.0517707	0.345834	0.530732	-0.156581	0.107081	0.144907	-0.127675	-0.707904	0.304949	0.387597	0.103686	0.225941	0.37624	0.0858941	-0.0212111	-0.65629	-0.342098	0.0212111	-0.229456	-0.534682	-0.781835	-0.546582	-0.588806	-0.859915	0.629487	0.772874	0.517152	-0.205705	0.238154	-0.229815	0
200740_s_at	SUMO3	-0.459299	-0.128252	0.105459	0.195213	-0.669512	-0.437447	-0.0962009	-0.37693	-0.745108	0.186893	-0.255739	0.185373	0.0714636	0.194574	0.0652199	0.110532	-0.183342	-0.0225897	-0.0776949	0.0225887	0.0325384	0.0248356	0.0171442	-0.289718	0.757266	-0.090538	-0.0494366	-0.0325794	-0.330126	-0.761963	0.299295	0.666785	0.168446	-0.0171442	-0.407835	-1.43221	0.249683	0.436007	0.149638	0.33008	0.421471	0.24045	-0.654484	-0.870455	0.135055	-0.381071	0.0960999	0.00443173
200741_s_at	RPS27	0.177828	0.707704	0.409413	0.620221	0.384591	-0.613343	-0.570174	-0.0957575	0.318736	-0.242127	0.0856066	-0.536749	-0.200201	-0.466479	-0.374366	-0.0912485	-1.28193	0.242806	0.0563545	0.253194	-0.0563545	0.0636454	0.0126657	0.236608	-0.364426	0.686629	0.034955	-0.845807	-0.610379	-0.358709	0.0157452	-0.0657997	0.0776672	0.132656	0.399429	-1.00031	0.0888338	-0.214141	-0.230993	-0.286531	-0.298939	0.304285	0.229732	-0.0126667	-0.104118	0.10382	-0.380434	-0.131399
200742_s_at	TPP1	-0.126737	-1.06498	-0.700477	0.0406904	0.115478	0.0543852	-0.704227	-0.865925	-0.98868	0.0156918	-0.0156918	0.12703	0.161585	0.129105	0.0823507	0.320307	0.117991	-0.764439	-0.647347	-0.862973	0.504191	-0.246623	0.858341	-0.0967426	1.08664	-0.192247	-0.402645	-0.628213	-0.327967	-0.90349	0.259377	-0.642311	0.0967426	-1.36187	0.452721	-0.555647	0.688708	1.36145	1.05108	1.36308	1.67904	-1.41348	-0.685438	0.647737	-0.0997276	-0.140451	0.00434685	0.0348854
200743_s_at	TPP1	0.518271	-0.731167	-0.945453	-0.106456	0.608233	0.103362	-0.177266	-0.375527	-0.485749	0.287616	-0.0125418	0.0125418	0.293906	0.222487	0.210188	0.314945	-0.436128	-0.216604	0.227856	-0.731583	0.545245	-0.0442419	0.55476	-0.12536	0.975357	-0.538238	-0.99942	-0.394023	0.12536	-1.14439	0.71906	-0.147386	-0.366894	-0.168296	0.139428	-0.570163	0.369425	0.638599	0.213978	0.865636	0.861174	-2.9601	-0.340057	0.182229	0.0743484	-0.236531	-0.0220633	0
200744_s_at	GNB1	0.485081	-2.32778	-0.642764	0.541059	0.677635	0.300108	0.654431	0.376273	0.458479	-0.342419	-0.287487	-0.342291	-0.318259	-0.186542	0.048439	-0.648361	-0.958297	-0.0291405	0.316218	0.685961	0.0291405	-0.339651	0.262672	0.521941	0.564833	0.846342	-0.0208321	0.489418	0.553787	0.595472	-0.235144	0.198009	0.385345	-1.41686	-0.26294	-0.875756	-0.494504	-0.572478	-0.027298	0.0208321	-0.168077	-0.637607	-0.486289	0.475505	-0.019949	-0.0466661	-0.0739908	0.00565147
200745_s_at	GNB1	0.129703	-1.6835	-0.501804	0.367959	-0.528735	-0.947414	1.05062	0.157452	0.085043	0.243443	-0.62118	0.01688	0.0529108	-0.0280952	-0.141981	-0.325463	-0.641802	-0.459875	0.55451	-0.01688	0.237578	0.034318	0.49931	-0.151231	0.989238	0.0493574	0.44815	1.39302	0.657191	0.197531	0.639504	1.63447	-1.08448	-0.318555	-0.45535	-1.54115	-0.0822439	-0.0493574	-0.244121	-0.124972	0.622012	-0.385665	-0.197621	0.299235	0.40272	-0.443651	0.184184	0.230801
200746_s_at	GNB1	0.0204391	-0.480868	-0.392035	-0.326638	-0.317134	-0.0204391	0.260885	0.0891924	-0.391211	0.325171	-0.210446	-0.111759	-0.16306	0.0852661	-0.171353	0.111156	0.0555592	0.139426	0.717662	0.164641	0.332129	-0.323409	-0.28298	0.468006	0.371867	-0.33855	0.410583	0.818805	0.412314	-0.190819	-0.497046	-0.398973	0.986039	-0.263589	-0.0218306	-0.937378	-0.16158	0.164679	0.00390244	-0.0227251	0.124398	0.374515	-0.00390244	0.0921259	0.396025	-0.0638371	0.024251	0
200747_s_at	NUMA1	0.0172195	-1.37475	-1.73742	-0.351053	0.0572586	0.362706	-0.705602	-0.481528	-0.239562	0.0550365	0.224438	0.0720902	0.31072	0.0991612	-0.0172195	-0.489755	-0.887115	0.693783	0.484132	0.282401	-0.0600071	-0.0461969	-0.109219	0.450996	-0.308424	0.493115	0.502111	-0.317442	0.0224476	0.0529327	-0.593126	-0.87632	0.0927181	0.297852	0.27606	-0.658272	0.180069	-0.302561	0.248268	0.0394115	-0.424663	-0.187471	-0.152768	-0.0224476	0.0747614	0.294289	0.186066	0.27955
200748_s_at	FTH1	0.50175	-0.776194	-1.99646	-0.48419	0.48728	0.843386	1.06759	1.04462	0.948621	0.370466	0.143702	-1.10075	-0.586506	-1.41836	-0.928811	-1.03967	-0.544964	0.159013	-0.0919657	0.531906	0.0919657	-0.217893	0.536541	0.87663	0.0247354	-0.180194	-1.24361	1.05263	1.01455	-0.076045	0.245546	0.134397	0.726864	-0.860115	0.68354	-2.00151	-0.103759	-0.513299	0.0410919	-0.656515	-0.258421	-0.593915	-0.0247354	1.31248	0.671381	0.339806	-0.926351	-0.33294
200749_at	RAN	-0.110075	0.00613022	-0.282324	-1.15837	-0.775528	-0.238508	0.0847759	-0.076642	-0.548115	-0.209982	0.16386	0.444221	-0.0769081	0.308994	0.153513	0.367805	1.00929	-0.0435944	0.143795	-0.00307083	0.00307083	0.170834	-0.0551348	0.0704527	-0.0114775	-1.01152	-0.171367	0.194898	0.125931	-0.398896	0.601104	0.643958	-0.162286	0.0212774	-0.242899	-0.835248	-0.444901	0.130834	-0.0476713	-0.139793	0.347347	0.412622	0.174697	0.0114775	-0.208545	0.258312	0.464338	0.0102539
200750_s_at	RAN	0.187635	-1.74416	-1.27161	-0.205763	0.000284	0.859381	1.39997	1.25223	0.268068	-0.124237	0.161797	-0.738562	-0.819378	-0.709887	-0.888706	-0.955039	0.82248	0.164548	0.502228	-0.000284	0.0130634	-0.317738	0.747137	0.807006	1.00246	0.00833225	0.95139	1.35203	1.151	0.41764	-0.0822954	1.15022	-0.169807	-0.974042	0.0626783	-3.4812	-0.394481	-0.368306	-0.287898	-0.48785	-0.416797	-0.00833225	-1.7613	0.539698	0.21064	0.517931	-0.489573	-0.537961
200751_s_at	HNRNPC	1.64189	-0.882668	-0.0551577	-0.149907	0.0424733	0.0720034	1.07375	0.757629	-0.0682745	2.3765	0.917065	0.545084	-0.0144958	0.144569	-0.341266	-0.0464339	-0.206722	-0.170599	0.219691	0.0144958	-0.15537	-0.284834	0.723438	1.00037	-0.176163	-0.271973	-0.286849	0.970907	0.222312	-0.185474	0.372765	0.949717	-0.0385952	-0.494955	0.939474	-0.225789	-0.531598	0.547853	0.149466	-0.547166	-0.473377	-1.98209	0.0385957	0.401334	2.36802	0.847928	0.47735	-0.0106101
200752_s_at	CAPN1	0.537308	0.0176129	0.585843	0.32492	-0.0176134	0.822615	0.614001	0.824716	0.34013	0.0248046	0.176697	-0.29451	-0.211563	-0.525954	-0.327284	-0.226663	-0.890813	-0.209663	-0.145592	0.17658	-0.173995	-0.340824	-0.390205	0.676043	-0.0184498	0.697325	0.458661	0.516633	0.657543	0.210248	0.000301	-0.221862	-0.0544744	0.339123	-0.0502143	-0.0003	0.0191545	-0.386987	-0.298541	-0.678304	-0.465638	0.176811	0.457819	-0.204409	0.112284	0.377099	0	-0.06669
200755_s_at	CALU	-0.433625	-0.24184	0.800592	-0.065999	-0.496746	-0.103163	0.000478	-0.358892	-1.0821	0.11231	0.0209856	0.276997	0.0255184	0.384576	0.136693	0.28152	-0.119413	-0.435039	0.104775	-0.861615	-0.000478	0.0661879	-0.0859323	-0.291015	0.657883	0.314061	0.702905	0.575181	-0.0862818	-0.273592	0.0737414	0.0105066	-0.392206	-0.0854988	0.0369039	-0.509175	0.236351	0.159658	-0.154935	0.213257	0.32886	-0.160376	-0.0105062	-0.443321	0.466968	0.325109	0.59273	0.387915
200756_x_at	CALU	-0.424732	0.576723	0.759833	0.538654	0.366297	-0.195268	0.312662	-0.401942	-0.259217	-0.310291	-0.312674	-0.184844	0.0487237	0.242331	0.370058	0.0471382	-0.218278	-0.19305	-0.173092	-0.00512886	0.032867	0.00512886	0.187543	-0.512812	-0.351617	0.87556	-0.0217075	-0.286701	-0.0579758	-0.0703406	0.331343	-0.268687	0.161951	0.152989	0.168853	0.90285	0.118524	-0.043189	-0.105048	0.0238638	-0.0278301	-0.0827327	0.233286	0.021708	-0.274205	-0.259937	-0.197225	0.0217896
200757_s_at	CALU	-0.239636	0.105393	-0.0825386	-0.0499325	-0.321239	0.131061	0.296249	0.245634	0.400763	-0.0333204	-0.0182943	-0.0517159	-0.112416	0.116289	-0.393467	0.0182943	0.829631	-0.233285	0.905209	-0.453053	0.0854769	0.188992	0.033288	-0.033288	0.509551	0.502702	0.663711	0.728264	0.170464	0.538603	0.772437	1.61454	-1.01635	-0.0556231	-0.52522	-0.451686	-0.675334	-0.470623	-0.36223	-0.240998	-0.100758	-0.206884	0.360808	0.0880356	0.134072	0.122731	0.251439	0.076251
200758_s_at	NFE2L1	-0.440513	-0.451878	-0.91863	-0.540261	-0.627344	-0.146595	-0.659115	-0.420253	-0.016634	0.452313	0.179977	0.51761	0.249795	0.281711	0.0447636	0.0890493	-0.321798	0.257586	0.016634	-0.1366	0.309661	0.282783	0.316489	-0.340982	0.0287809	-0.737459	-0.915119	-0.135813	-0.0287809	-0.331625	-0.0466156	-0.342523	0.0528851	0.344256	0.168405	-0.646248	0.144243	-0.102782	0.567595	0.358315	0.472936	-1.00364	0.984988	0.925162	0.318218	0.035223	0.355728	0.103217
200759_x_at	NFE2L1	-0.477412	-0.0808229	-0.79013	-0.395915	-0.93399	-0.206925	-0.196008	-0.0900021	-0.479159	0.0386181	0.0827341	0.442009	0.380078	0.346395	0.304428	0.178489	-0.79736	0.211184	0.177137	-0.0386181	0.339523	0.247026	0.264223	-0.501334	0.139326	-0.548176	-0.468136	0.186996	0.381729	-0.489526	-0.384536	-0.52479	-0.139326	0.302849	-0.186423	-0.837491	0.146982	-0.190465	0.292321	0.191898	0.496075	-0.399228	0.306868	0.526324	0.000547	0.0368452	0.468252	0.344048
200760_s_at	ARL6IP5	1.01737	-1.83335	0.449945	0.976445	0.301118	-0.72032	1.60169	1.17708	0.646633	0.594296	-0.280758	0.566077	-0.460855	-0.487922	-0.690306	-1.28052	-0.203929	-0.0326881	0.17471	0.0326881	-0.198362	-0.21992	-0.535849	0.464905	0.532669	1.01882	0.0938759	1.04612	0.701289	0.362445	-0.0185184	0.71566	-0.230577	-0.656604	0.0185184	-1.3014	-1.06196	0.151731	-0.512905	-0.682524	-0.169485	-1.30832	-0.724222	0.411383	0.87926	0.00676251	0.784056	-0.242734
200761_s_at	ARL6IP5	0.035697	0.16293	0.369648	0.355892	0.0133514	-0.0461388	0.0150652	-0.344251	-0.0287743	-0.111433	0.00235844	0.135735	-0.529385	-0.00235939	-0.0764504	-0.100962	0.0531654	-0.261402	-0.23057	-0.119585	0.227299	0.384209	-0.0288668	0.160792	0.99375	0.330059	-0.179962	-0.0140438	-0.163227	-0.420523	0.780848	0.990825	-0.825692	-0.809199	0.0140438	-1.42036	0.0696897	0.179649	-0.591989	0.384397	0.522537	-0.430696	-0.624733	0.328561	0.0467997	0.164968	0.282017	-0.375438
200762_at	DPYSL2	-0.237105	-0.492391	-0.742936	-0.172338	-0.434156	-0.141954	0.141954	0.358408	-0.325924	0.421769	0.174649	0.495265	0.519608	0.778387	0.655402	0.759844	0.703042	-0.893003	0.172132	-0.653833	-0.377319	-0.519084	0.582089	0.13646	0.377259	-0.018775	0.0948706	0.706674	0.503694	-0.283003	0.37458	0.999847	0.018775	-0.887702	-0.112139	-2.08709	-0.557271	0.296158	-0.4002	-0.358293	-0.273116	0.122163	-0.794469	-0.479048	0.955319	0.705428	1.03595	1.10389
200763_s_at	RPLP1	0.531253	0.211727	-0.0707207	0.448504	0.214638	-0.0357227	0.000723	0.088665	0.665058	-0.000724	0.0601511	-0.540014	-0.569107	-0.506695	-0.49801	-0.46952	-1.87962	0.151758	0.228206	0.278443	-0.392267	-0.116472	0.0166912	0.504029	0.184513	0.757924	0.269228	-0.114128	-0.0352602	-0.0166912	-0.164185	0.236543	0.137636	0.130077	0.477935	-1.73312	-0.529838	-0.213876	-0.186235	-0.438744	-0.48328	0.407269	-0.33529	0.512224	0.134072	0.309614	-0.313557	-0.240224
200764_s_at	CTNNA1	-0.137222	-1.1819	-1.05358	-0.843314	-0.131567	0.479638	1.23107	0.922553	-0.258774	0.332641	0.206341	-0.171552	-0.11895	0.0812626	-0.0812626	-0.465134	-0.129379	0.471151	0.797034	0.277788	0.579246	0.344495	0.820594	0.0518999	0.327159	-0.3861	0.122252	1.60376	1.27193	-0.495652	-0.16844	0.156043	0.0993671	-0.850711	0.218356	-1.31236	-0.182212	-0.162285	-0.130156	-0.115549	0.0591536	-1.27705	-0.0518999	0.189926	0.45959	0.322079	-0.00911045	0
200765_x_at	CTNNA1	-0.294721	-0.73576	-1.0896	-0.879722	-0.663734	-0.00552368	0.12635	-0.16284	-0.773649	0.0920916	0.0160885	0.181604	0.0306587	0.307053	0.0523548	-0.12359	-0.159081	0.213511	0.498739	0.00552368	0.021697	-0.0502415	0.142474	0.0745716	0.335178	0.0949564	-0.00243854	0.83095	0.615067	-0.536954	-0.0997763	0.365532	0.19129	-0.375645	0.101725	-1.7963	-0.191079	0.00125694	0.0956974	-0.0112448	-0.126688	-0.658148	-1.11845	-0.00125694	0.231356	0.0942135	0.36632	0.222962
200766_at	CTSD	0.857161	-1.05526	-0.991147	-0.658408	1.25059	2.11887	0.946838	0.675405	1.01972	0.827802	0.65628	-0.0719957	-0.104623	-0.55785	-0.550479	-0.625112	-1.7619	0.0612984	-0.238509	0.125381	0.0432816	-0.0432816	0.0520239	0.931771	0.263688	-0.201776	0.404681	0.605764	0.833947	0.818451	0.13514	-0.247715	-0.473955	-0.0520239	0.172352	-0.207974	-0.216464	-0.499116	-0.179411	-0.883269	-0.269186	-1.35898	0.386445	0.549231	1.10273	1.11942	0.147841	-0.0698824
200767_s_at	FAM120A	-0.0117235	0.092938	-0.661613	-0.126721	0.198455	0.534888	1.16873	1.01256	-0.268599	0.0681438	0.011724	-0.285562	0.383853	0.420886	-0.030057	-0.496966	-0.186642	-0.0157137	0.198455	0.031136	-0.0446863	-0.336572	0.142196	-0.601267	0.172068	-0.174148	0.06144	0.966718	0.814406	-0.293493	-0.304742	-0.256131	-0.1178	-0.0156965	0.316883	-0.0587955	0.139494	0.015697	0.261168	-0.0693851	0.202158	-0.184798	0.0896459	-0.0890241	-0.0131779	-0.155194	-0.304822	0.167245
200768_s_at	MAT2A	0.194977	0.424463	-1.08942	-0.41877	0.4791	0.517885	0.0429716	0.482577	-0.176193	-0.0684833	0.00892734	-0.0506525	0.145144	-0.45684	0.455005	-0.248446	0.554852	-0.00892734	-0.332775	0.0479879	-0.195744	-0.193196	0.198766	0.0327091	-0.320007	-0.573036	-1.114	-0.194096	0.340199	-0.896872	-0.0327091	-0.302658	0.52328	0.6806	0.542749	-0.933004	-0.0792217	0.318761	0.478356	-0.0733128	0.102283	-0.146125	0.298849	0.309206	-0.141795	-0.0467062	-0.0817814	0.155355
200769_s_at	MAT2A	-0.0187969	0.57715	0.429534	0.308424	0.216152	0.578873	0.946256	0.454417	-0.167561	-0.0818944	-0.0229259	-0.458292	0.0174341	-0.0557847	-0.177204	-0.0358376	0.574467	0.209785	-0.0174341	-0.053587	0.0465508	-0.0877323	0.496408	-0.195054	0.0967221	-0.53639	-0.34688	0.817163	0.642793	-0.602748	0.030972	-0.158518	0.334869	-0.110948	-0.161662	-0.030972	-0.159696	-0.129028	0.536796	0.238638	0.301723	-0.90693	0.875394	0.230724	-0.115826	-0.0769062	-0.440932	-0.0711851
200770_s_at	LAMC1	0.168679	-0.106947	0.393574	-0.210439	0.778468	-0.0478773	0.416864	0.141239	0.950518	-0.320668	0.121479	-0.235193	-0.00362635	-0.0455585	0.0456324	-0.37203	0.527853	-0.0127978	-0.174126	-0.194377	0.136635	0.00362682	-0.20519	0.273512	0.364801	0.458753	1.23192	0.229868	0.111004	0.423209	-0.137063	-0.0844121	-0.691209	-0.951889	0.280502	-0.0108771	-0.0610733	-0.18968	0.0847082	-0.00308704	0.00308704	-0.793929	-0.0339479	0.0422201	-0.346571	0.138089	-0.263278	0
200771_at	LAMC1	0.290813	-0.186898	0.107109	-0.0917816	-0.406626	-0.406849	0.066515	-0.375155	-0.498144	0.115261	0.0326157	0.437984	0.406975	0.257933	0.344991	0.616077	-0.0326157	-0.687772	0.12071	-1.69318	-0.427551	-0.926725	0.353421	0.468097	0.42893	0.827985	1.11409	0.459278	0.197222	0.0622654	0.277904	1.11455	-1.19535	-0.127485	-0.207463	-1.57773	-0.995937	0.29028	-0.127063	-0.0739651	-0.0622654	-0.0718193	-0.737148	-0.449583	0.484182	0.389947	0.90413	0.733424
200773_x_at	PTMA	-0.085413	0.0288601	0.0421715	0.416856	-0.110955	0.327225	0.22613	0.329881	0.611388	0.222414	-0.0288601	-0.104933	-0.288559	-0.236011	-0.139465	-0.130226	-0.640242	-0.337712	-0.210052	0.153369	0.188621	0.126668	0.123335	0.0750675	-0.0169916	0.21009	0.267138	0.105845	0.0169916	-0.185694	0.57787	0.812889	0.0740299	-0.384797	-0.846035	-1.59634	-0.773623	-0.459602	-0.485344	-0.499131	-0.248655	0.832034	0.382203	-0.117149	0.405437	0.145801	0.0433779	-0.108525
200774_at	FAM120A	-0.0635748	-0.67176	-0.283038	0.0210171	0.344378	-0.543251	0.655744	0.605695	-1.27548	0.24966	0.00446892	0.167514	0.00769234	-0.157775	-0.0227203	-0.0204763	-0.00446892	-0.16407	0.0870762	-0.180872	0.542178	0.336232	0.414165	-0.29905	0.417338	-0.641657	-0.0207195	0.618287	0.345236	-1.76294	-0.433887	-0.282855	-0.149549	-0.338178	0.0706253	-0.946296	0.313937	0.40062	0.370636	0.345068	0.426806	-1.28735	0.0207205	-0.0926714	0.202245	-0.0463362	0.126584	-0.0287838
200775_s_at	HNRNPK	0.252926	-0.252109	0.406883	0.477936	-0.530371	0.38793	1.21436	0.85793	-0.0524216	0.338792	0.00509167	-0.00509167	-0.0393229	0.0458689	0.0176668	0.189081	-0.62207	-0.929924	-0.644836	-0.572491	-0.324263	-0.450063	0.291305	-0.313561	0.0398827	0.0265551	0.687379	0.778725	0.686316	-0.652877	0.452039	1.05537	0.112909	-0.0265551	-0.782777	-1.13783	-0.345846	-0.401177	-0.439726	-0.345291	-0.225639	0.105438	-0.118171	0.148698	0.25205	0	0.0311718	0.0281315
200776_s_at	BZW1	0.220305	-0.610336	0.0143471	-0.256061	0.140778	-0.115703	1.33308	0.813342	-0.0143471	-0.0401397	-0.0862274	0.20448	-0.0661497	0.0792742	0.502415	-0.0355272	0.365043	-0.130258	0.0661593	-0.339593	0.136288	-0.0419927	0.26499	-0.139436	-0.120447	-1.41766	-0.565607	0.778357	0.540847	-0.314577	0.425312	0.61387	-0.490758	-0.350053	-0.0644321	-1.68797	-0.0365858	0.710744	0.307806	0.427609	0.597833	0.0371561	-0.4652	0.0365858	-0.108979	-0.226437	0.0365152	-0.149556
200777_s_at	BZW1	-0.124917	0.21522	-0.280788	-0.457299	-0.844859	0.368966	0.822927	0.823057	-1.12335	0.0176592	-0.0176592	0.204935	0.167791	0.317435	0.434216	0.462923	0.654023	-0.531046	-0.328774	-0.481035	-0.0756178	-0.07761	0.101562	-0.199925	0.314839	-0.515108	0.471036	1.05716	0.791895	-1.32743	-0.0066061	1.09212	-0.364691	0.0066061	-0.179236	-1.95805	-0.388268	0.346758	0.0436869	0.134283	0.145439	-0.0290108	-2.67758	-0.445962	0.0617065	0.000599	0.19146	0.22842
200778_s_at	SEPT2	-0.253818	-0.954673	-0.578526	-0.515747	-0.320415	-0.676566	0.0711193	-0.280149	-0.875435	0.296616	-0.231501	-0.142315	0.177379	0.345694	0.21289	0.576913	0.602859	0.0312538	0.510286	0.0153675	0.139337	-0.0153675	0.000248	0.427847	0.527353	-0.251763	0.185654	0.346408	0.0409718	-0.000248	-0.233883	0.601379	-0.304893	-1.31803	-0.218893	-1.16185	-0.0487928	0.300548	0.356037	0.331917	0.0636444	-0.338942	-0.554049	-0.104556	0.565104	0	0.0836687	0.403798
200779_at	ATF4	-0.335566	-0.695295	-0.825883	-0.0460997	-0.25689	-0.00114822	-0.282421	0.0224581	0.0767508	0.0696306	0.226844	0.0441914	-0.248635	-0.236185	0.00114822	-0.430509	-0.502745	0.236681	0.00981617	0.624714	0.0931788	0.283689	0.0168924	-0.158996	0.00854111	0.451815	0.629444	-0.00854111	0.0611286	0.200544	-0.575594	-0.372627	0.219719	0.179743	0.179874	-0.761465	-0.293499	-0.186602	-0.128897	-0.938765	-0.110979	-0.188772	0.648485	0.398916	0.123036	0.586912	0.216205	0
200780_x_at	GNAS	-0.357029	-2.37667	-1.41645	-0.167377	-0.495568	0.101669	-0.1657	-0.292958	-0.318428	-0.138835	0.383027	0.106042	0.0193653	0.431398	0.660772	0.338958	-1.00228	0.169861	0.55701	0.0319118	0.240819	-0.0193653	-0.135389	0.59854	0.4852	0.572125	0.964709	0.457213	0.0884085	-0.949757	-1.22577	-1.33072	-0.0902405	-1.87417	-0.211723	-2.49958	-0.390932	-0.0884085	0.424938	0.477983	0.394962	0.531095	-1.54378	0.244556	0	0.551966	0.233163	0.143145
200781_s_at	RPS15A	0.297309	0.503192	0.257734	0.570789	0.214182	-0.413862	0.0762243	0.271322	0.198947	-0.358235	-0.0823479	-0.191628	-0.0479708	-0.355503	-0.182457	0.0230131	-0.740318	0.490434	-0.0985079	0.266224	-0.279546	-0.0230141	-0.223619	0.290762	-0.0352716	0.72264	0.693893	-0.00868034	0.025774	0.00867939	-0.409507	0.727539	0.580051	0.114922	0.392604	-1.74416	-0.272671	-0.0781546	-0.258782	-0.0211563	-0.289818	0.476897	0.159368	-0.0716515	-0.243887	0.116125	-0.084631	0.0483294
200782_at	ANXA5	0.36407	-1.72659	-0.601556	-0.561844	0.112726	-0.0550117	1.13263	0.779615	-0.51678	-0.2453	-0.194034	0.327573	-0.199559	-0.20472	-0.346283	-0.055069	0.58943	0.0550117	0.367062	0.538211	0.377797	0.323854	0.673328	0.536795	1.1997	0.123257	0.676391	1.11266	0.844715	-0.98228	0.251094	0.713485	0.23428	-0.688799	-1.19602	-2.5069	-0.941034	0.0140362	-0.281692	-0.22382	-0.45758	-0.0140362	-1.90314	-0.697359	0	0.0178251	0.5687	0.012907
200783_s_at	STMN1	-0.141102	0.0160074	0.597589	0.129954	-0.71258	-0.884173	0.154531	-0.330619	0.0996695	-0.131836	-0.0160074	0.186257	0.195049	0.183199	-0.165788	0.598186	0.058876	-0.171837	-0.246085	-0.0279846	-0.281478	0.110957	0.0718002	0.0175066	0.0629396	0.32809	0.116432	0.130046	-0.537661	0.0257969	0.562963	0.677401	-0.173607	-0.211249	-0.637842	-0.70798	0.0163946	-0.0163946	-0.771916	-0.388774	-0.244364	0.0902138	-1.1492	-0.372229	-0.0355988	0.0133123	0.369525	0.18668
200784_s_at	LRP1	-0.00339508	0.946332	0.433184	-0.0970469	0.210779	0.0280228	-0.551574	-0.456054	-0.428617	-0.100724	0.117386	0.00339508	0.12592	-0.150519	-0.0429831	0.161807	-0.6133	0.038846	-0.527827	0.124804	-0.0477381	0.132436	-0.451734	-0.0330567	-0.164958	0.432395	0.0499916	-0.681723	-0.215512	-0.405238	-0.104255	-0.565074	0.296935	0.218232	0.519284	0.464303	0.290395	-0.34429	-0.162137	-0.0507541	0.0330567	0.317753	0.43426	0.20637	-0.290343	-0.00971651	-0.0581102	-0.0503602
200785_s_at	LRP1	0.13413	0.589939	0.378851	-0.0216384	-0.00814819	0.240036	-0.0486307	0.065238	0.317452	0.178854	0.00400066	-0.00400066	0.0557466	-0.356235	-0.224938	-0.138277	-0.220891	0.135192	-0.268775	-0.154088	-0.0411491	0.0175495	0.062324	-0.0808935	-0.140577	0.564268	0.56346	-0.293551	0.00237513	-0.00237513	0.359541	-0.500572	0.225193	0.0778947	-0.0212889	0.373694	0.0581107	-0.613026	-0.262418	-0.21969	-0.181104	0.222888	0.638732	-0.244635	0.226285	0.0527635	0.00950766	0.201001
200786_at	PSMB7	-0.0412521	-1.01681	-0.862839	-0.342964	0.705817	0.755943	0.507935	0.251334	0.135569	-0.23959	0.0412521	-0.501776	-0.341418	-0.39584	-0.396004	-0.581507	-0.158853	0.546502	0.509742	0.984081	0.443006	0.511182	0.765187	0.0421314	0.148029	0.109262	-0.480482	0.257293	0.289553	-0.0289793	-0.501089	-0.214539	0.717385	-1.00087	-0.0849457	-1.47418	0.451506	-0.557921	0.0673876	0.00293732	-0.100391	-0.214296	-0.00293732	0.855644	-0.255831	0.0498161	-0.493345	-0.315433
200787_s_at	PEA15	0.0146174	0.0478535	-1.15652	-1.05585	-0.689872	-0.55212	-0.803993	-0.416344	-0.0146174	0.276914	0.797374	0.965255	0.286633	-0.192473	-0.368039	-0.275826	-0.256379	0.680046	1.59072	1.57595	0.696692	0.929769	0.17369	0.329747	0.0384989	0.215864	0.634181	0.756486	-0.24741	0.0138559	-0.0973654	-0.764254	0.482804	-0.0138559	-0.120432	-0.0573845	-0.257581	-0.34891	0.0359173	-0.398457	-0.101875	0.530099	0.558258	-0.0640249	0.61952	1.34981	1.48993	0.713449
200788_s_at	PEA15	-1.21587	-0.42573	-1.32807	-0.54108	-1.98832	-0.642165	-1.27082	-0.971812	-0.00777531	0.00777531	0.496499	0.229604	0.011157	0.241849	-0.285066	0.21207	-0.0742826	0.114302	0.640934	0.402831	0.447879	0.609233	0.256742	0.554016	0.439051	1.23072	1.07063	0.56282	-0.0315666	1.08826	0.0143862	0.0899487	0.368689	-0.245046	-0.254601	-1.25477	-0.807438	-0.0143862	-0.352153	-0.538165	-0.498412	-0.0798845	-0.117547	0.436967	0.332288	0.780525	0.505948	0.257222
200789_at	ECH1	-0.00644779	-1.91838	-1.5051	-0.107317	1.71388	0.966927	0.29422	0.394658	0.357115	0.0261831	0.00644779	-0.484169	-0.0266018	-0.300044	-0.400051	-0.839005	-1.37216	0.852465	-0.158342	0.480309	0.132937	0.0899801	0.879765	0.302296	0.320735	-0.47447	-1.09546	0.212949	0.413888	0.122906	-0.869948	-0.589477	0.578625	-0.937981	-0.00496578	-1.28125	0.00496578	-0.468331	0.55623	0.216866	-0.144389	-0.368996	-0.340466	0.537004	0.0227757	0	-0.494784	-0.0316849
200790_at	ODC1	-0.703694	-1.11253	-1.42909	-0.272148	-1.0411	1.26797	1.10453	0.886774	-1.28876	-0.115911	-0.0258923	0.0541859	-0.055109	0.278008	0.638403	0.0904808	0.562635	-0.136625	-0.184834	0.0466442	0.29201	0.0258923	0.24654	-0.143954	0.570721	-0.998844	-0.0553169	0.979096	0.73904	-1.20227	-0.391127	0.374255	-0.164776	-0.394842	-0.0256786	-2.23849	0.0593491	0.482289	0.0256786	0.429676	1.0026	0.138909	-0.17763	-0.134836	-0.183914	-0.121161	0.0341682	-0.0728645
200791_s_at	IQGAP1	-0.28617	-0.602961	-0.671687	-0.358053	-1.16096	-0.794359	-0.000626	-0.126935	-0.542947	0.0902576	0.205359	0.0927963	0.000626	0.230881	0.0458612	0.391452	0.206676	-0.160668	0.341213	-0.230074	0.258579	0.198522	0.332942	-0.0486393	0.703435	0.446504	1.05725	0.617956	0.314764	-0.00973606	0.398485	1.46235	-1.1218	-0.785455	-0.443639	-2.03203	-0.728597	-0.192112	-0.0784006	-0.0479631	0.183294	0.0582991	-1.61642	0.00973606	0.430532	0.402774	0.334286	0.246097
200792_at	XRCC6	0.0753393	-2.29657	-1.16812	-0.0980663	-0.0112257	0.0112257	0.356917	0.0867167	0.411184	-0.0726356	0.062705	-0.0679188	-0.186701	-0.0651321	0.0140495	-0.354751	-0.130171	0.475733	0.588844	0.290856	0.0400562	-0.109725	0.210265	0.302727	0.0150433	0.268935	0.602871	0.42376	0.393523	0.503577	-1.24981	-0.45804	0.0598278	-0.623329	-0.0516853	-1.62705	-0.477788	0.0266733	-0.0150433	-0.166852	-0.0711212	-0.6861	-0.831463	0.539182	0.189055	0.380994	0.0682259	0
200793_s_at	ACO2	0.134001	-1.92648	-2.35892	-0.835566	0.791201	1.68554	1.52649	1.62215	0.13052	-0.0192385	-0.0925884	-0.503653	-0.24934	-0.385807	-0.159045	-0.601232	-0.62747	0.954886	0.455702	0.327024	0.642132	0.0192385	1.31875	-0.252987	0.86424	-1.40839	-1.50225	1.34053	1.7915	-0.579628	-0.232728	-0.103266	-0.0613804	-1.34912	0.240178	-1.40278	0.514275	-0.193122	0.622704	0.759418	0.463994	-1.81043	0.0613804	1.17053	-0.00104904	-0.196477	-0.581928	-0.357497
200794_x_at	DAZAP2	-0.104417	-0.811598	-1.46886	-0.693383	-0.202946	0.0151291	0.468678	0.471628	-0.140078	0.040513	-0.0563364	0.0932322	-0.0151291	0.053936	0.0934362	0.0595493	0.08286	-0.0428514	0.222988	-0.163323	0.0724735	-0.114615	0.245614	0.0402489	0.225478	-0.568259	-0.0915947	0.694592	0.626343	-0.330544	0.319747	0.765441	-0.0475931	-0.626564	-0.101811	-1.70018	-0.129126	0.219409	0.0834761	0.0496168	-0.0402489	-0.28966	-1.44254	0.187422	0.0536451	0.0401478	0.234116	0.0245848
200795_at	SPARCL1	0.664998	-1.5216	-0.0549898	0.5556	1.0289	0.821105	0.899515	0.746245	-1.17041	-1.72385	-0.503396	0.574605	-0.0660171	-1.48124	1.52088	0.90527	0.0549898	-0.216787	0.438366	-0.628265	-0.20781	-0.0606031	1.1818	-1.01785	1.37515	0.0546093	2.15886	-0.0546093	0.32165	-1.1669	-0.857616	0.370339	-0.33625	-2.0514	-0.508102	-1.71707	0.405363	1.4044	1.00685	-0.543729	1.88605	0.840586	-1.60919	-1.09326	-1.83356	-0.605753	0.563555	-0.172583
200796_s_at	MCL1	-0.427456	0.131111	0.637459	0.146041	0.393611	-0.0574541	-0.139443	-0.0270882	-0.032218	0.0977683	-0.231299	0.0986195	-0.057219	0.0193291	-0.0574541	0.277182	-0.21378	-0.0193291	0.208903	0.0991487	-0.0731626	0.301681	-0.201836	0.212374	-0.099153	0.120742	-0.104198	0.0148439	-0.14403	-0.0148439	-0.0615659	-0.339771	-0.041378	0.10442	-0.0657783	0.503964	-0.183063	0.0715566	0.172568	0.163611	0.489617	0.434412	0.398709	-0.105522	0.030941	-0.302755	0.0257053	-0.121498
200797_s_at	MCL1	0.260693	0.148673	-0.12821	-0.0771551	-0.276784	-0.166286	-0.190298	0.460333	-0.12034	-0.0476484	0.105508	0.319285	0.158271	0.301383	0.792861	-0.105861	-0.0197258	-0.37903	0.102624	0.0527019	0.0197258	-0.194995	-0.158067	0.341231	-0.221179	0.23665	0.712061	0.266852	0.345506	-0.510559	0.029006	0.00192738	-0.00192738	0.986906	-0.512205	-1.08499	-0.0609722	0.301449	-0.0513821	-0.419602	0.362054	1.07687	-0.475749	-0.246769	0.0480757	0.0925074	0.333931	0.182382
200798_x_at	MCL1	-0.105317	0.0841932	-0.221215	-0.315154	-0.695733	-0.728158	1.28534	2.73199	-0.57585	-0.152553	0.48485	0.583198	0.0437803	0.588483	1.74442	-0.0437799	1.17201	-0.10916	0.340115	-0.545514	0.558491	-0.140907	0.0558381	-0.954284	-0.537505	-0.508221	0.349202	1.8072	0.995017	-1.31522	0.114449	0.488835	-1.14695	-0.0558386	-0.750443	-2.12489	-0.733965	1.20976	0.408106	0.179177	1.33931	1.39025	-1.65455	-1.16789	-0.420487	0.121703	0.457727	-0.305948
200801_x_at	ACTB	-0.0499344	0.00297356	-0.177533	0.301338	-0.00297356	0.895431	1.63917	1.48736	0.273475	-0.0679741	-0.267245	-0.172403	-0.450399	-0.295954	-0.019887	-0.193113	0.123817	-0.272598	0.0116396	0.0149574	0.140952	0.108164	-0.00386238	-0.136006	0.190875	0.042738	1.06896	1.52143	1.23679	-0.311257	0.200227	0.805782	0.320619	0.00386238	-0.602686	-1.80129	-0.484279	-0.32883	-0.538481	-0.453002	-0.314948	1.07142	0.296926	-0.137574	0.203468	-0.0277681	0.0874767	-0.258903
200802_at	SARS	-0.0742445	-1.11195	-1.39506	-0.570526	0.0742445	0.685007	0.282701	0.321321	0.143209	-0.15472	0.139296	-0.105389	-0.208361	-0.163444	-0.11279	-0.797482	-0.645354	0.401135	0.585819	0.403275	0.225256	0.18565	0.418978	-0.0200672	-0.00568962	0.0389452	1.05946	0.357073	0.309814	0.337918	-0.585248	-0.514915	0.00568962	-0.853327	-0.307915	-0.383892	-0.0875568	-0.687348	0.0653057	0.0654526	-0.0406837	-0.0166292	0.338744	0.492947	0	0.363362	0.0387402	-0.0425034
200803_s_at	TMBIM6	0.611208	-0.84314	-0.607275	-0.247591	0.634941	0.463732	-0.0760555	0.0255842	-0.294754	0.201914	-0.41109	-0.372269	-0.0348682	-0.348677	-0.0122852	-0.315563	0.12586	0.220401	0.0744629	0.0122852	0.480304	0.0315237	0.257024	-0.0587845	0.468917	0.169017	-0.0831366	-0.812928	-0.215862	-1.09715	-0.748266	-0.783905	0.0587845	-1.01434	0.23231	-1.46619	0.31456	0.269483	0.337219	0.446005	0.580863	-1.08473	-0.374543	0.127439	0.111555	-0.56883	-0.585323	-0.178926
200804_at	TMBIM6	0.0310879	-1.35147	-1.80025	-0.425351	-0.0915985	1.06119	0.744266	0.805799	-0.772784	0.128088	-0.309661	-0.116193	0.0661974	-0.0229025	0.0487022	0.159778	0.195112	0.0587788	-0.0373774	-0.329682	0.0229034	-0.0733252	0.431883	-0.18019	0.618495	-1.08093	-0.451332	0.504134	0.844784	-1.80007	-0.630728	-0.45016	-0.0538836	-0.603713	0.256072	-1.90801	0.414101	0.59196	0.483182	0.66977	0.686771	-1.33135	-0.571505	0.0538836	0.0394106	-0.423778	-0.17499	-0.0101099
200805_at	LMAN2	0.393859	-1.15774	-0.341534	-0.00403023	0.456855	0.74431	0.515228	0.580542	0.871078	-0.18068	0.0172262	-0.0319195	-0.133883	-0.246167	-0.210579	-0.423712	-0.800277	0.00403023	0.289657	0.0529928	0.0443315	-0.0295801	0.0384302	0.464441	-0.0384302	0.94676	0.6445	0.0778952	0.32657	0.512225	-0.357641	0.0977554	0.0886316	-0.163664	0.0577831	-0.372445	-0.303946	-0.673398	-0.280511	-0.2293	-0.246297	-0.6078	-0.374837	0.597118	-0.0328865	0.0514994	0.077858	-0.00151539
200806_s_at	HSPD1	0.00685453	-2.33373	-1.45003	-0.110889	0.814101	0.316193	1.98228	2.40011	-0.655428	0.565781	-0.0642552	0.457922	0.273315	-0.864829	-0.00685453	-2.05102	-0.591425	0.219645	0.218977	-0.568843	0.285318	-0.525233	1.75761	-1.29008	0.290339	-1.54555	-2.38821	1.20355	0.874056	-2.15643	-0.386527	-0.0782871	0.967763	-0.524221	0.00286198	-1.82314	0.458978	-0.00286198	1.27562	0.198913	0.989165	-2.71368	-0.374727	0.12706	0.287926	-0.381523	0.153659	0
200807_s_at	HSPD1	0.208368	-0.458614	-0.945898	-0.305513	0.806954	0.761037	0.954182	0.953531	-0.086483	0.218132	-0.240689	-0.207438	-0.224441	-0.313127	-0.286642	-0.102755	0.765474	0.0864821	-0.227875	0.285864	0.538032	0.23391	0.498933	-0.331939	-0.00657177	-1.20805	-1.36783	0.561878	0.395861	-1.62763	0.0906248	0.00657082	0.233529	-0.238501	0.283475	-1.5567	-0.0845575	0.274656	0.108698	0.100296	0.231121	-1.31562	-0.54574	-0.0141735	0.0205803	-0.39617	-0.294065	-0.420626
200808_s_at	ZYX	0.654381	-0.49929	-0.132709	-0.0452704	-0.058136	0.242644	0.62043	0.224257	0.0751815	-0.501335	0.281816	0.0471559	-0.445955	-0.422397	0.013257	-0.297959	-1.09799	0.504159	0.904348	0.471335	-0.0132566	-0.40159	-0.410914	0.520921	0.157854	1.09762	2.10111	1.19923	0.244911	0.606009	-0.237319	-0.479559	-0.306424	0.071116	-0.258656	-0.0346327	-0.442379	-0.101324	-0.38767	-0.561528	0.0346332	0.117595	0.384189	-0.184816	-0.0937829	0.970298	0.329211	0.0423069
200809_x_at	RPL12	0.244084	0.250073	0.383123	0.476628	-0.0234184	-0.423076	-0.271667	-0.0561132	0.293814	-0.0323448	0.0890331	-0.282544	-0.113284	0.0234184	-0.180822	-0.117112	-0.508701	0.452349	-0.0290833	0.0329809	0.0513306	0.0425196	0.0285854	0.501802	0.231192	0.80447	0.483423	-0.368261	-0.138703	-0.272072	-0.0488472	0.198393	0.15617	0.250792	0.457575	-1.60063	-0.672138	-0.195076	0.001194	-0.228485	-0.681936	0.245111	-0.001194	-0.0302658	-0.0360002	0.128401	-0.12267	-0.153458
200810_s_at	CIRBP	0.00109863	0.0383616	-0.357685	-0.301328	-0.492704	-0.20509	-0.348358	-0.218186	-0.520868	0.364615	0.0219936	0.188435	0.19938	0.309525	0.0682182	0.232813	0.400989	-0.00109863	-0.0534201	0.112472	-0.257663	-0.153645	0.00613689	0.0239849	0.0493622	-0.579505	0.210078	-0.31502	-0.059577	-1.03236	-0.232347	0.0019989	0.254848	0.57832	-0.0107698	-1.04796	-0.0231276	0.12107	-0.121793	0.022398	-0.33016	0.483943	0.299155	-0.00199795	0.335682	-0.030467	0.148433	0.157068
200811_at	CIRBP	-0.153305	-0.0764151	-0.48464	-0.00735378	-0.552835	0.140646	-0.0968742	0.205532	-0.296007	0.47442	-0.153741	0.117563	0.0802202	0.244449	0.0453415	0.13912	-0.208581	0.00735378	0.0840435	0.359	-0.149348	-0.255393	0.86678	-0.264727	0.479185	-0.766895	-0.10587	-0.268282	-0.0393152	-0.000777	0.12096	0.495702	0.645698	0.552623	-0.203334	-1.08462	0.0155621	0.000777	-0.226538	0.175729	-0.0552177	0.402472	-0.244722	0.719456	0.40403	-0.310013	0.031868	0
200812_at	CCT7	0.104807	-1.06805	-0.580787	-0.0241365	0.12591	0.288924	0.263034	-0.118882	0.0241365	-0.0946016	-0.0356798	-0.381127	-0.17265	0.111102	-0.0365801	-0.0549335	-0.777975	0.494665	0.424056	0.343804	0.192357	0.288076	-0.169628	0.265821	0.724069	0.0370541	0.0483265	0.149092	0.0639	-0.143181	-0.139266	-0.0433483	0.152205	-0.0520582	-0.240603	-1.44645	0.00933266	-0.136235	-0.00933266	0.36664	0.206874	-0.632587	-0.800538	0.360614	-0.0401211	0	-0.158509	-0.116068
200813_s_at	PAFAH1B1	-0.573783	-0.321479	-1.1923	-0.867923	-0.494761	-0.389143	0.0480747	0.0519285	-0.579406	-0.0974722	-0.203012	0.719402	0.467878	0.565665	0.2862	0.6588	0.835175	-0.690766	0.256104	-0.0480747	0.557861	0.068675	0.443427	-0.663943	0.295039	-0.907846	-0.425938	0.849103	0.0500369	-0.452105	-0.0130725	0.387618	-0.472499	-0.541757	0.013073	-0.540493	-0.170989	0.80655	0.425087	0.564695	0.586653	-0.319681	-0.293453	0.600931	-0.123611	-0.188566	0.739638	0.43889
200814_at	PSME1	0.0446081	-0.794475	-0.160061	0.409679	0.0905533	-0.107029	0.190052	0.100969	0.0266352	-0.0287943	0.0409269	-0.0824451	-0.169718	-0.0350018	0.0296536	-0.13472	-0.180848	0.164165	0.471715	0.0136929	-0.0136929	-0.0445042	-0.0656767	0.676448	0.540137	1.30086	0.416729	0.282535	0.524363	0.278512	-0.719998	-0.248691	0.145366	-0.44348	0.256706	-0.917176	-0.144256	0.0176916	-0.0443678	-0.3562	-0.140722	0.0813818	-0.074584	-0.0176916	0.210266	0.199766	-0.0250664	-0.0269794
200815_s_at	PAFAH1B1	0.504446	-0.156517	-0.447144	-0.418131	0.175341	0.298112	1.10664	0.408317	-0.105992	0.349998	0.289934	-0.0659862	-0.0861979	-0.1871	-0.122506	0.0183077	1.18185	-0.0183077	0.120952	-0.0602708	0.0220976	-0.20653	0.374447	0.0625353	0.361185	-0.109444	-0.478014	0.372685	0.445841	-0.798036	0.1758	-0.0625353	-0.510567	0.395849	0.474567	-0.337186	-0.145961	0.100552	0.185063	-0.294916	-0.15536	-1.25615	0.55867	-0.125581	0.258984	0.204217	-0.12492	-0.174255
200816_s_at	PAFAH1B1	-0.666541	-1.16503	-1.48999	-0.737764	-0.873258	-0.335762	-0.254308	-0.511834	-1.06991	0.0165434	-0.0165434	0.526314	0.180379	0.517492	0.431002	0.52148	0.753817	0.132708	0.493685	-0.163904	0.468848	0.524326	0.722582	-0.31362	0.878842	-1.21778	-0.349162	0.451559	0.0515194	-0.961068	0.506729	0.313261	-0.329615	-0.221513	-0.367013	-1.66641	0.498405	0.470246	0.383046	0.46604	0.627511	-0.806128	-1.88915	-0.0515194	0.0293255	0	0.564023	0.131398
200817_x_at	RPS10	0.489219	0.0603895	0.284576	0.494447	0.522252	0.0106258	-0.332677	-0.0296249	0.884841	-0.142529	0.25781	-0.670842	-0.995588	-0.762471	-0.49225	-0.578249	-1.85839	0.85746	0.708677	0.652063	-0.0106258	-0.0554142	0.118377	0.761872	0.0311766	1.1638	0.312381	-0.172018	-0.169883	0.417923	-0.813916	-0.309089	0.491204	0.429828	0.873233	-0.803474	-0.128201	-0.834535	-0.2486	-0.66081	-0.901025	0.474679	-0.0311766	0.838407	0.039937	0.514425	-0.348004	-0.364097
200818_at	ATP5O	0.175906	-0.93529	-1.1098	-0.195487	0.397813	0.585492	0.728733	0.595128	0.195856	0.0868578	0.0356216	-0.737718	-0.946887	-1.24115	-1.053	-1.00661	-0.826924	0.19846	0.116173	0.418691	-0.0875769	-0.0356216	0.582132	0.217627	0.566903	0.105082	-0.447298	0.720151	0.696479	-0.278427	-0.867105	-0.192343	0.559942	-0.617896	0.488005	-2.25105	0.318513	-0.105082	-0.134394	-0.44039	-0.284735	0.964029	-0.243932	0.626162	0.240622	0.16317	-0.514317	-0.814596
200819_s_at	RPS15	0.169488	-0.488064	-0.279881	0.211596	0.439876	0.400748	-0.0587482	0.0815611	0.750361	-0.0745001	0.0627422	-0.924703	-0.931011	-0.962028	-0.701835	-0.787837	-1.16642	0.385155	0.217229	0.404088	-0.0126486	0.0126495	-0.00926113	0.338326	-0.0446758	0.455553	0.422102	0.00926018	0.207172	0.0468254	-0.618214	-0.88558	0.158044	-0.121742	0.642322	-1.35264	-0.460125	-0.436423	-0.20699	-0.16956	-0.325204	0.512049	0.6138	0.907582	0.324748	0.459532	-0.533576	-0.570608
200820_at	PSMD8	0.26342	-1.01444	-0.859902	-0.50625	0.51155	0.603066	0.129369	0.204033	0.72858	-0.349352	-0.0620356	-0.768964	-0.545084	-0.473578	-0.355495	-0.872198	-0.875504	0.482897	0.328991	0.953219	0.0620356	0.148814	0.292747	0.648213	0.310698	0.149905	0.0270157	-0.00327587	0.336569	0.943814	-0.616071	-0.538651	0.00327587	-0.803878	0.350494	-0.70995	-0.0768967	-0.403791	-0.0515966	-0.224505	-0.236575	-0.312492	0.305305	1.00204	0.000813	0.363818	-0.387626	-0.231614
200821_at	LAMP2	-0.269175	-0.130133	0.360087	-0.110881	-0.534551	-0.831846	0.290242	-0.0717258	-0.254415	0.322043	0.234833	0.483343	0.340441	0.34371	0.0717258	0.568305	1.07003	-0.309381	0.28058	-0.854877	-0.210293	-0.0858269	0.713397	0.376196	0.116319	0.362407	0.44012	0.580228	0.454852	0.116689	-0.0614395	1.03152	-0.509225	-0.502653	-0.0417013	-0.966615	-0.328362	0.239751	-0.0784998	-0.0278645	0.0278645	-0.0717678	-1.59555	-0.0358896	0.604319	0.394967	0.789988	0.559052
200822_x_at	TPI1	0.743563	0.026104	-1.02028	-0.177462	0.406708	1.6027	0.777535	0.873809	0.302124	0.419727	0.228771	-0.323426	-0.0390873	-0.368755	-0.187453	-0.446416	-0.648625	0.0990639	-0.588769	0.412024	-0.215555	-0.026104	-0.10757	0.198781	0.216208	-0.595987	-0.282289	0.0396194	0.25976	-0.613458	-0.312863	-1.42317	-0.0396194	-0.137011	0.582755	-0.962677	-0.139612	-0.147114	0.265001	0.266173	0.195152	0.421955	0.445104	0.629136	0.0868263	0	-0.640179	-0.403292
200823_x_at	RPL29	0.591456	-0.471896	-0.206724	1.00201	1.06096	-0.244164	-0.280331	-0.0643168	1.18269	0.0643168	0.4167	-1.11149	-1.11093	-1.43444	-1.17665	-0.924509	-3.17543	0.881622	0.410768	1.22049	0.172495	0.350517	0.609021	0.946761	0.307246	1.54677	0.580821	-0.0524664	0.0524664	1.16493	-0.69077	-0.549645	0.920493	-0.64056	1.07189	-1.73065	-0.409451	-0.574828	-0.255164	-0.79178	-0.905361	0.53763	-1.0203	1.50683	0.852974	1.08502	-0.322154	-0.283622
200824_at	GSTP1	1.06519	-0.534833	0.231704	0.0187683	1.07506	-0.0187683	-0.206211	-0.209922	1.31843	0.353216	0.735221	-0.49042	-0.36321	-0.249301	-0.483358	-0.347376	-1.09035	0.694587	0.345	1.22569	0.122216	-0.151927	0.734673	1.16985	0.44379	1.57276	-0.483787	-0.0311604	-0.0733023	1.36544	-0.489165	-0.958545	0.0311604	-0.443606	0.522065	-0.0623474	0.0986805	-0.507832	-0.606216	-0.412074	-1.0043	0.388785	0.321764	0.483116	0.423433	0.537766	-0.428875	-0.368702
200825_s_at	HYOU1	-0.0187044	-0.589156	-0.169639	0.0256119	-0.0194712	1.37059	0.464951	0.0187044	0.189127	0.282219	0.371856	0.0709381	-0.0634031	0.475726	-0.0703878	0.105761	-0.601308	-0.232113	0.790114	-0.796231	-0.0750437	-0.317732	0.0183201	0.0512247	-0.0923967	-0.240974	-0.0458765	0.482618	1.03096	0.177122	1.03964	1.03376	-0.750133	-0.0318041	0.0136728	-0.298131	-0.460616	-0.206481	-0.0709791	-0.0136728	0.154188	-0.278114	1.07324	0.0980463	0.560164	0.597609	0.278269	0.0750756
200826_at	SNRPD2	0.848581	0.34511	-0.0243988	0.46954	0.820462	-0.465838	-0.771729	-0.583533	1.80344	0.0243988	0.662077	-0.56323	-0.336338	-0.583716	-0.65082	-0.349594	-0.778146	1.24977	1.47525	1.28707	-0.254029	0.214744	-0.0147762	1.38331	0.280498	1.72387	1.12753	-0.145368	-0.347192	1.58069	-0.744342	-0.30591	1.02403	0.510475	0.884075	-0.607682	-0.0870237	0.0147762	-0.288671	-0.442957	-0.546676	1.27652	-0.62035	1.18198	0.295851	0.956271	-0.136175	0.0207748
200827_at	PLOD1	0.200015	-0.283585	-0.557866	-0.582886	0.803964	1.29161	0.591781	0.650016	0.426414	-0.119606	-0.0864611	-0.0468402	-0.234404	-0.164324	-0.0226226	-0.364834	0.116705	0.141309	0.244741	0.0209765	0.45763	-0.020977	0.085597	-0.348651	-0.287973	-0.427971	0.0230007	0.262657	0.70115	-0.0499821	-0.709038	-1.38708	0.337287	-0.0302944	0.538955	-0.390557	-0.315227	0.0678062	-0.0230007	0.260645	0.198181	-1.14255	0.655966	0.525946	-0.135452	-0.0618343	-0.0419126	-0.174998
200828_s_at	ZNF207	-0.0616617	-0.533313	-0.32214	0.021102	0.472696	0.149568	0.821218	0.674653	0.0470285	-0.336251	-0.436567	-0.38004	-0.127563	-0.216744	-0.021102	-0.0821476	-0.669663	0.144827	0.396867	0.239914	0.505841	0.321957	0.728133	-0.0191965	0.777252	-0.0375557	0.634561	0.694032	0.372264	0.066349	-0.23558	0.504139	-0.432486	-0.973459	-0.561463	-0.698096	-0.250846	-0.0791445	0.0191965	0.0521107	0.045599	-0.536623	-1.02744	0.310422	-0.292273	-0.358059	-0.230947	-0.0796833
200829_x_at	ZNF207	-0.261369	0.358644	0.666102	0.196334	-0.267065	-0.541246	0.368106	0.191675	-0.188053	-0.365869	-0.19811	0.191895	-0.0885496	-0.0511904	0.0543528	0.0974321	-0.026082	-0.0992527	-0.142078	0.0407286	0.026082	0.225019	-0.156528	-0.0409994	0.277625	0.289793	0.23906	0.0409994	-0.12607	-0.523008	0.191524	0.584982	-0.160008	0.174578	-0.068471	-1.0055	-0.124732	0.163583	0.128984	0.0892086	0.120652	-0.0997868	-0.0511932	-0.359049	-0.351233	-0.162198	0.228412	-0.11935
200830_at	PSMD2	0.0959778	-0.615417	-0.701541	-0.000443	0.215157	0.307639	0.269833	0.0380964	-0.643043	-0.31202	-0.063118	0.139558	-0.0337229	0.000443	-0.158928	-0.896721	-0.40408	0.464957	0.583837	0.165381	0.112109	-0.0424032	0.0210047	0.0405407	0.318579	0.205291	0.0757351	0.242082	0.466193	-0.719197	-0.998823	-0.722425	0.116164	0.124392	0.126121	-1.23827	-0.276319	-0.329971	-0.0210047	0.15652	-0.375128	-0.562483	-0.612415	-0.246228	-0.179142	0.015501	0.258303	0.0946255
200831_s_at	SCD	-0.0978603	0.287834	0.688057	0.589003	0.503377	1.00607	0.562929	0.120486	0.391739	-0.0230775	-0.279953	-0.193314	0.0181141	-0.427564	-0.137332	-0.0596366	-0.657036	0.00244236	0.00149441	-0.00149393	-0.0525861	-0.221329	-0.402544	-0.220239	-0.25315	0.22576	-0.233416	0.540905	0.358524	-0.038897	-0.372492	-0.618593	-0.00171232	0.622589	0.425114	1.16777	0.00171232	-0.0618944	0.62281	0.0493789	-0.364266	-0.292477	0.286894	0.348774	-0.109337	-0.187976	-0.189278	0
200832_s_at	SCD	0.0291748	-1.96373	-2.03183	-0.115711	2.13809	2.36265	0.893897	0.320217	-0.795941	-1.11929	-0.889851	0.102416	0.634212	-0.203751	0.914363	0.131761	0.71637	-1.38921	0.967983	-1.22577	-0.0291748	-1.28085	0.98405	-0.246054	0.932646	-1.25424	0.00997257	1.27071	1.21372	-1.4397	-0.160671	0.97645	0.0509458	-0.132433	-0.00997257	-1.83606	-1.25597	0.260662	1.37516	0.544482	0.880107	-2.92176	-1.25842	-0.128724	-0.827375	-0.359926	0.430158	1.07099
200833_s_at	RAP1B	0.203805	0.547001	0.0113201	-0.11852	-0.405544	0.0788698	0.507759	0.558612	-1.12191	-0.0113201	-0.133945	0.208001	-0.102596	-0.11966	0.106753	0.0222626	0.84448	-0.30067	0.135912	-0.218058	-0.295783	-0.296731	0.130033	0.00248432	0.563621	-0.00573063	0.856432	0.430321	0.324205	-1.39739	0.381269	0.432489	-0.284388	0.310734	-0.273205	-2.07061	-0.311077	0.0261669	-0.136135	-0.139246	-0.00248527	0.418377	-1.6242	-0.616602	0.0823679	0.0111475	0.314621	0
200834_s_at	RPS21	0.408596	0.815533	1.02251	0.84512	0.470072	-0.621514	0.0462093	0.288985	0.735528	-0.0462084	-0.232169	-0.377797	-0.127555	-0.431607	-0.193423	-0.259214	-0.776423	0.701596	0.216622	0.399754	-0.365418	-0.104341	-0.111942	0.185007	0.320436	0.946975	0.479083	-0.151119	0.0341053	-0.160706	-0.203447	0.269563	0.349982	0.738489	0.19887	-1.00637	0.0868235	-0.184559	-0.280547	-0.24157	-0.141948	0.595222	-0.660537	-0.0341043	-0.000287	-0.137593	-0.209375	0
200835_s_at	MAP4	1.42166	-0.868378	-0.317664	0.126904	-0.967755	-0.51015	-0.29626	-0.126904	-0.644321	1.62209	0.739516	1.9102	1.05192	0.670192	0.800039	-0.216357	0.177055	0.702114	1.48207	-0.532672	-0.674522	-0.737236	-0.00935078	0.594938	0.0936141	0.449018	0.803951	0.606634	-0.122696	-0.524222	0.0093503	-0.121609	1.34489	-0.059936	0.405369	-0.0463462	-0.202865	0.384145	1.08908	-0.181909	0.0223517	-0.478556	-0.30063	-0.295417	1.63877	0.731866	1.9671	0.769628
200836_s_at	MAP4	-0.245153	-0.249997	0.778024	0.389321	0.369679	0.0394421	0.256054	0.0867653	0.350059	-0.171395	-0.0529003	-0.23382	-0.113197	0.0399008	-0.0934396	-0.0394425	-0.0805125	-0.146915	-0.137599	0.121687	0.0439224	0.0942411	0.247381	-0.209453	-0.103495	0.101415	0.730558	0.446171	0.109292	-0.0609927	0.421006	-0.0641093	0.421252	-0.209673	-0.444584	-0.208258	0.400522	-0.249655	-0.0813098	-0.149592	-0.0190816	0.217113	0.551465	0.0190811	-0.0932522	-0.10094	-0.28081	-0.0776138
200837_at	BCAP31	0.17695	-1.58305	-1.01245	0.148459	0.279642	0.175694	-0.0348988	-0.182651	1.20721	0.021431	-0.0061779	-0.27192	-0.268651	-0.58908	-0.641039	-0.884746	-1.76849	0.378711	0.628822	0.342741	0.610761	0.0061779	1.18314	0.374419	0.81451	0.271404	-0.516256	-0.0776682	-0.0479107	0.781272	0.507977	0.00691318	-0.0230799	0.0418596	-0.223027	-1.20689	-0.00691318	-0.352188	0.133418	-0.108132	0.345205	-0.957629	-0.192043	1.5373	0.152499	0.182291	-0.270687	-0.330856
200838_at	CTSB	1.00198	-1.45772	-1.56812	-0.200757	1.17177	1.94873	2.53194	1.97791	0.879732	0.0408211	-1.00998	-1.13917	0.214897	-0.992166	-0.56991	-0.900058	-0.0888615	0.64843	-0.553544	0.118702	-0.0329266	0.0329266	1.40432	0.645218	0.507019	-0.352796	-0.421849	1.88866	1.63096	-0.241355	0.181851	-0.0538473	-0.211719	-1.55047	-0.105759	-1.67295	0.182396	-0.524056	0.361352	0.0538473	0.0672598	-2.47099	-0.559591	1.91904	0.0682154	-1.06825	-1.16153	0.169032
200839_s_at	CTSB	0.851068	-0.547391	-0.750281	-0.130883	1.06774	0.6237	1.34693	0.948739	0.219335	0.0576515	-0.784702	-0.702589	0.31062	-0.604746	0.132512	-0.0576515	-0.267605	0.23921	-0.260289	-0.0787172	-0.205904	0.0581141	0.301111	0.271417	0.0712299	-0.430779	-0.527521	0.386771	0.717127	-1.24261	-0.141492	-0.33817	-0.399629	-0.398417	0.0136518	-1.43108	0.0841332	-0.0118284	0.246886	0.0118294	0.165027	-1.90688	-0.318373	0.617636	0	-0.85059	-0.723891	0.308568
200840_at	KARS	-0.0548258	-0.503366	0.567733	0.430793	-0.0696487	-0.22289	0.302873	0.178324	0.3157	-0.233975	0.00718021	0.0257378	-0.00338078	0.11091	-0.0305414	-0.082427	-0.145448	0.17333	-0.0890198	0.269146	-0.145403	0.00337982	0.200268	0.245993	-0.12443	0.396005	-0.0147858	0.383321	0.331066	-0.161308	0.415235	0.388715	0.0549316	-0.195151	-0.222044	-1.13116	-0.00516605	-0.190182	-0.0202036	0.00516701	-0.101754	0.12856	-0.278793	0.261322	-0.216718	0	0.079052	0.0414867
200841_s_at	EPRS	0.53055	0.504027	1.41936	0.675712	-0.0769162	-0.0476236	-0.303716	-0.143291	-0.155859	1.07788	-0.120202	0.194197	0.00693893	0.0316114	-0.215827	0.0407968	0.282019	0.172685	-0.00693893	-0.0655251	-0.0508475	-0.0882335	0.00317526	-0.198401	-0.405822	0.589246	0.06563	-0.249099	0.432082	-0.306892	0.0214543	-0.132925	-0.0796757	0.105906	0.181437	1.3199	-0.208488	-0.033608	-0.00192165	0.00192165	0.0344567	-0.0423951	0.099503	-0.281092	0.695793	-0.143838	0.0159783	-0.111439
200842_s_at	EPRS	0.313641	-1.9068	0.00140572	-0.247953	0.459751	-1.45934	0.809231	0.34377	-0.316373	-0.299536	-0.262915	0.336578	0.160248	0.0441256	-0.0814686	-1.14094	-0.205976	-0.165093	-0.00140572	0.228205	0.289601	0.102074	0.550863	-0.0802736	-0.26288	0.497306	1.09782	0.621606	0.805373	-0.380311	0.797272	0.403862	-0.446965	-0.625927	-0.294437	-0.886879	-0.386753	-0.681855	0.548176	-0.214748	0.0802736	-0.413835	0.931326	0.521732	-0.248838	-0.0859461	0.515294	0.30251
200843_s_at	EPRS	-0.32499	-1.16514	0.0156879	-0.274199	-0.221949	-0.0156879	0.513172	0.317032	-0.530106	-0.252675	-0.40863	0.0251741	0.0498009	0.175832	0.304499	0.523423	0.441155	0.124516	-0.163416	-0.260431	0.201298	-0.245994	0.198382	-0.352534	0.402852	0.156159	0.772012	0.382459	0.452647	-0.963044	0.028266	0.934224	-1.33615	-1.33437	-0.342958	-1.62186	-0.266084	-0.0115652	0.0115652	0.38561	0.383285	-0.380563	-1.55428	-0.156942	-0.292568	-0.376159	0.0292158	0.0513926
200844_s_at	PRDX6	0.137219	-0.0203247	-0.874973	-0.18795	-0.0945749	-0.0222406	0.30375	0.152062	-0.154997	0.251211	-0.00597	-0.0222216	0.00637341	-0.0485916	-0.272114	0.00597	-0.531474	0.316553	0.229425	0.374328	0.183341	0.130695	0.189643	0.553405	-0.0153599	-0.160424	-0.666329	0.449082	0.620667	-0.744305	-0.340217	0.0495605	0.0153599	0.159458	0.496173	-0.960509	-0.0714445	0.135724	-0.120804	-0.133615	-0.17001	-0.325956	0.359822	0.222931	0.238735	0	-0.000181	0.0244665
200845_s_at	PRDX6	-0.489021	-0.0617542	-0.335993	-0.33349	-0.262443	-0.184072	0.137727	0.0647249	-0.480869	0.0105524	-0.106098	0.212902	0.224619	0.175365	0.04175	0.276735	0.576991	-0.0368605	0.114239	0.0834599	-0.0346718	-0.0105534	0.328361	-0.220055	0.0169382	-0.384929	-0.264896	0.326365	0.46371	-0.787704	0.276373	0.361171	0.125805	0.108121	-0.336129	-1.93497	-0.166406	0.0546074	-0.119143	-0.0169382	-0.374898	0.525029	0.0577517	-0.193946	0.0982723	-0.0593672	0.304351	0.257455
200846_s_at	PPP1CA	0.160593	-1.07905	-0.640041	-0.015667	0.400865	0.793563	0.819084	0.485122	0.863884	-0.691534	-0.517834	-0.885064	-0.853154	-1.00548	-0.909419	-1.19522	-2.13055	0.360618	0.0624828	0.782924	0.122752	0.015667	0.824352	-0.0408573	0.276347	0.561789	0.0408573	0.843949	0.800853	1.58225	-0.131015	-0.398132	0.82325	-0.914347	-0.168484	0.113557	0.250291	-0.612918	-0.222314	-0.343623	-0.669854	-0.264807	-0.065321	1.20783	0.0910602	-0.00200462	-0.219144	-0.372513
200847_s_at	SARAF	-0.160398	-0.474476	-0.319408	-0.300012	-0.26831	-0.259113	0.186819	0.301348	-0.780832	-0.130932	0.0235567	0.455793	0.217378	0.2942	0.101391	0.270946	0.325954	-0.378032	0.0990067	-0.0144901	-0.03619	0.0144901	0.457417	-0.348891	-0.130662	-0.629165	-0.224838	0.47903	0.338263	-0.990913	0.27019	0.518389	0.0477514	-0.185041	-0.314766	-1.86885	-0.00874138	0.49091	0.231286	0.45683	0.539769	-0.306293	-1.79606	0.00874042	-0.104037	0.0889092	0.443126	0.210404
200848_at	AHCYL1	1.40013	-1.08791	-0.354541	-0.354421	-0.377401	1.29391	1.69937	1.43598	0.441383	1.20958	-0.199379	0.0145664	-0.227016	-0.270617	-0.614189	-0.0145664	0.68752	0.250908	0.135205	-0.355299	0.0282917	-0.0609646	-0.154772	-0.168978	-0.0445614	-0.937279	-0.211698	1.24163	1.00224	-0.800367	0.165236	0.704046	-0.378643	-0.415033	0.234693	-0.704636	-0.153409	0.374822	0.0445614	-0.400045	0.129889	0.466397	0.434067	0.574987	0.970734	-0.299042	-0.218718	-0.487503
200849_s_at	AHCYL1	0.683152	-0.000835	-0.542212	-0.59558	-0.132582	0.750216	0.305239	0.404645	0.000835	0.463406	0.374178	0.267569	0.127227	-0.201098	-0.245239	-0.79397	0.0735922	0.17602	-0.0490293	-0.245892	-0.0750885	-0.225744	-0.173235	-0.00440311	-0.21516	0.112807	-0.427002	0.00215244	0.203664	-0.997245	0.0743523	-0.273317	-0.0497198	0.156	0.435308	-0.631758	0.136397	0.171541	0.412225	-0.190124	-0.00215244	0.437474	0.560069	-0.13005	0.285049	0.18911	0.013402	0.0298948
200850_s_at	AHCYL1	0.42133	-1.07143	-1.72747	-0.846499	0.0976372	1.05605	1.09565	0.841824	-0.779335	-0.0254993	0.0254993	-0.0866175	-0.136124	-0.200918	-0.230821	0.173971	-0.0940819	0.481831	0.672651	0.117929	0.260107	-0.0858326	0.0290308	0.0904951	0.249359	-0.581592	-0.0290308	0.920735	0.874183	-1.08754	-1.08492	-0.638735	-0.0504189	-0.351178	0.108186	-1.83108	-0.205276	0.348659	0.346009	0.316655	0.157595	0.480206	-1.08492	-0.296426	-0.0111818	0	-0.193502	-0.126272
200851_s_at	IST1	-0.0399685	-0.047349	0.16803	0.11844	-0.405307	-0.142623	-0.0533447	-0.229257	-0.0990591	-0.00128651	-0.0767622	0.0770178	0.016016	0.166598	-0.0258265	0.0464659	-0.121538	0.111309	0.160448	0.130959	0.0956574	0.00128651	0.0617828	0.0190229	0.44509	0.162887	0.100632	-0.0732002	-0.00358391	-0.2274	0.25187	0.502698	-0.0204668	0.00358391	0.0280504	-0.864243	0.133244	-0.196829	-0.208865	-0.0747805	-0.37751	0.0880213	-0.178072	-0.0718155	-0.00930119	-0.0633202	0.0933161	0.117846
200852_x_at	GNB2	0.232626	-1.2989	-0.759559	-0.442793	0.331149	1.61439	0.38229	0.267662	0.25091	0.0660953	-0.0652971	-0.668896	-0.679022	-0.468884	-0.237699	-0.63497	-2.66141	0.116922	0.302761	0.402486	-0.223539	0.0652971	-0.0662403	0.597907	0.392185	0.553082	1.12093	0.488917	0.694741	0.676997	-0.847166	-0.696548	-0.13548	-0.828765	0.153041	-0.651679	-0.29285	-0.276478	0.0271463	-0.24911	-0.0271463	0.158915	-0.567247	0.565639	0.417604	0.30991	-0.256768	-0.395473
200853_at	H2AFZ	0.05791	-1.54842	-0.991797	-0.18025	0.644564	-0.17763	0.0672522	-0.62408	-0.669446	-0.221517	-0.314885	-0.133665	-0.00204086	-0.106249	0.0690632	0.120225	0.399343	0.0939236	0.0908394	0.380418	0.00204086	0.0841265	0.184722	0.236451	0.380952	0.0103331	0.156155	-0.287019	-0.29769	-0.641922	-0.63499	0.24807	0.152407	-1.6313	0.114328	-3.13523	-0.306081	0.383458	0.110775	-0.109624	-0.0154667	-0.0103331	-2.5054	0.0572023	-0.219785	-0.23233	-0.0695581	0.0721521
200854_at	NCOR1	-0.00951958	0.124777	-0.515132	-0.769979	-0.175852	-0.232376	0.140235	-0.0274601	-0.597322	0.0925198	0.0575466	0.00951958	0.23422	0.124996	0.0139837	0.434412	0.319075	-0.290547	-0.205219	-0.550719	0.147385	-0.0597858	-0.0480261	-0.393251	0.313726	-0.613846	-1.43274	-0.0192785	0.126135	-0.507421	0.455652	0.367794	-0.87441	0.0192785	0.401619	-0.852653	-0.211235	0.471779	0.289261	0.577817	0.428367	-0.37732	-0.916855	0.110757	-0.0676737	0	-0.0481777	0.120982
200855_at	NCOR1	-0.419792	0.123401	0.0418019	-0.066391	-0.0601177	-0.414124	-0.455807	-0.405683	-0.487114	0.0601082	-0.503129	0.269942	0.29434	0.144904	0.301554	0.161901	0.0935945	0.159007	-0.0219197	-0.39279	-0.0740285	0.0219197	-0.0961394	-0.00587511	0.00587511	-0.32079	-0.32058	-0.217326	-0.249442	0.180445	-0.0203552	0.264791	-0.226696	0.127359	-0.0352836	0.42134	0.263524	0.409076	0.426519	-0.0287085	0.233692	0.035799	0.0519152	-0.187702	0.0157809	-0.420013	0.152865	0.262114
200856_x_at	NCOR1	-0.246986	-0.0157309	-0.0737777	-0.0709896	-0.526534	-0.394545	-0.146981	-0.350064	0.307122	0.104865	-0.284087	0.380577	0.333968	0.434364	0.278467	0.532763	0.61392	0.0157309	0.289631	-0.374384	-0.072329	0.0361385	0.389352	-0.659432	-0.0206566	0.00705719	-0.0925427	-0.165821	-0.0891228	0.210624	0.372096	1.17692	-0.776965	-0.0858231	0.00249481	-0.143815	0.280188	-0.103526	-0.00249481	0.192225	0.189132	0.362376	-0.61201	0.138078	0.130219	-0.347354	0.250557	0.299153
200857_s_at	NCOR1	-0.216541	0.0366888	-0.253156	-0.0844655	-0.293314	0.241579	0.796241	0.598488	0.283973	0.238552	-0.0568094	0.415945	0.380135	0.195164	-0.0579953	0.091177	-0.0366888	-0.539164	-0.447868	-0.239281	0.178258	-0.0709858	0.605533	-0.336178	-0.301533	-0.01893	0.391408	0.645399	0.622811	0.328154	-0.0126514	0.226533	-0.174911	-0.315702	-0.0962052	0.0467458	-0.362569	-0.132844	0.150984	-0.0196972	0.0126514	0.316499	-0.0918488	0.160025	0.292499	0.00550556	0.449111	0.465967
200859_x_at	FLNA	-0.0533543	-0.403846	0.333148	-0.324512	-0.00896835	0.0518827	-0.22076	-0.145391	0.688915	-0.366409	0.431702	0.00896835	-0.140203	-0.132757	0.0322723	-0.500566	-0.913068	0.428277	1.14195	0.435889	0.421293	0.316556	-0.178697	0.497911	0.409456	0.653263	1.24677	0.824237	0.0338984	0.135948	-0.186203	-0.360294	0.294257	0.381178	-0.0338988	0.290633	-0.300517	-0.568697	-0.321741	-0.46553	-0.418129	-0.346533	0.0987849	-0.246821	-0.0639024	0.714201	0.217721	0.00826311
200860_s_at	CNOT1	0.120388	-0.409423	-0.363264	0.217528	-0.0362492	-0.242272	-0.466638	-0.437329	-0.530437	-0.034688	-0.0106096	0.00388622	0.294477	0.355933	0.167168	0.267969	-0.493095	0.0870218	0.301476	-0.00388622	0.279667	0.0679741	0.0131722	0.0142546	0.817696	0.0837164	0.105558	-0.23641	-0.183286	-0.525355	-0.531217	0.0930185	-0.496943	-0.203998	-0.0131722	-1.2609	-0.0177488	0.0922213	0.400002	0.517499	0.674164	-0.48425	-0.920113	0.231045	-0.0752401	-0.0291433	-0.025218	0.203258
200861_at	CNOT1	-0.111428	0.556958	0.413796	-0.145057	0.0412955	-0.469844	-0.437558	-0.683917	-0.419664	0.00489569	-0.00489569	0.271193	-0.0594702	0.0503917	-0.026412	0.184522	-0.0508037	0.119441	-0.0940003	0.127258	0.376609	0.0251322	-0.451834	-0.104556	0.123911	-0.387424	0.261552	-0.0980811	-0.482443	-0.706956	-0.211689	-0.337226	-0.0491409	0.211834	0.0491409	0.50039	0.245422	0.180264	0.221521	0.490995	0.688651	0.18701	-0.124432	-0.476631	-0.11461	-0.20503	0.187751	-0.175766
200862_at	DHCR24	1.03913	-0.129955	0.456603	0.150752	0.855033	1.87976	1.68691	1.68151	0.187837	-0.0858684	0.12274	0.00286102	-0.328215	-0.4588	-0.00286055	-0.473168	-0.754307	-0.00620413	-0.352362	-0.42964	-0.285849	0.0671454	0.80153	0.190227	0.102232	-0.144262	0.240552	0.937316	1.27535	0.392829	0.431392	0.605135	0.00639772	-0.313812	-0.00639772	-0.727888	-0.412665	-0.255143	-0.225644	-0.475247	-0.0829925	-0.184866	1.25696	-0.0739822	-0.0798082	0	-0.0316625	-0.389442
200863_s_at	RAB11A	-0.0183039	-0.809908	-0.352182	-0.228441	-0.0263758	-0.298071	-0.458412	-0.437062	-0.936626	-0.201078	0.0627031	0.0990534	0.142818	0.262468	0.313648	0.169094	0.162614	0.229453	0.397851	-0.0385599	0.0183039	0.201087	-0.152568	0.584437	0.554268	0.194426	0.389467	-0.286423	-0.176525	-0.442782	-0.438674	0.2254	0.416773	-0.874595	0.0752926	-1.64864	-0.0752926	0.454706	0.395612	0.50298	0.183853	-0.132738	-1.19375	-0.215882	-0.328392	0	-0.0287886	0.0507994
200864_s_at	RAB11A	-0.136142	-0.89355	-1.76614	-1.84898	-1.05855	-0.961234	1.7217	0.653045	-0.313361	-0.0596685	0.133266	0.423777	0.155369	0.273786	0.15022	0.310669	0.390555	-0.527088	0.319379	-0.110877	-0.281055	0.0596685	0.819818	-0.0444026	0.987721	-0.870432	1.13582	2.19299	1.04598	-0.319851	0.755105	1.53074	-0.219486	-1.00971	-0.775504	-2.57931	-0.362733	0.100009	-0.506153	0.0444031	0.232059	1.00854	-3.04624	-1.00887	0.0300331	0.399995	0.622457	0.242923
200865_at	EIF3F	0.185592	0.138957	0.155406	0.221635	0.267345	-0.0890264	-0.212646	-0.233566	-0.0266943	-0.109175	-0.0605214	0.0542655	0.163411	0.0385895	0.113439	0.0240798	-0.055789	-0.0487931	-0.0240798	-0.0540748	-0.0624523	0.109635	-0.0369539	0.280619	-0.0374811	0.227733	0.00239778	-0.12709	-0.225723	-0.0687375	0.127591	-0.11112	-0.0658052	0.154079	0.102914	0.382973	0.0467222	-0.0495329	-0.122281	0.180658	-0.00239778	0.111827	0.277988	-0.0155232	-0.0953202	-0.130227	-0.0250049	0.184313
200866_s_at	PSAP	0.223362	-2.20461	-1.91404	0.0903397	-0.0658073	1.54815	2.45615	2.45184	0.660893	0.043581	-0.284542	-0.218105	-0.342804	-0.489548	-0.807465	-0.514907	-1.9796	-0.043581	0.150352	0.172626	0.70558	0.242609	1.56816	-0.857451	0.459145	0.240242	0.894187	2.01658	1.87848	0.0809469	0.536371	0.272895	-0.224997	-1.32303	-0.601581	-2.27217	0.310158	-1.18312	-0.26173	-0.263155	-0.189873	-1.92677	-0.0809469	1.26561	0.27078	-0.0222912	-0.0471764	-0.212641
200867_at	RNF114	-0.412182	-0.982103	-1.55164	-0.60356	-0.0237923	0.514873	1.30862	1.65577	0.0237923	-0.123978	-0.145743	0.231842	-0.366784	-0.115042	-0.112284	-0.1135	1.25171	0.167697	0.374288	0.388498	0.15938	0.0375414	1.10876	-0.375272	0.298278	-0.966138	-0.314746	1.17851	1.49317	0.0223866	-0.0332232	0.922406	0.240897	-1.42369	-0.169262	-2.09294	0.165112	-0.125416	0.0276499	-0.0223866	0.39753	-0.150779	-0.961932	0.437586	-0.248421	-0.226599	0.226933	-0.254743
200868_s_at	RNF114	0.11612	-0.435113	-0.172301	-0.321765	0.0330687	0.415943	0.174957	0.567559	0.138318	0.369123	0.213404	-0.123923	-0.177202	-0.0330687	-0.486849	-0.276155	-0.24949	0.566889	0.239857	0.955911	-0.124077	-0.0583878	-0.0194182	0.135353	0.0317001	0.258431	-0.338705	0.120187	-0.036026	-0.234443	-0.495248	0.777432	-0.215129	0.0194178	0.344304	-1.18389	0.114215	0.0232773	0.0932026	-0.0987773	-0.28302	-0.3585	0.201644	-0.0928683	0.33735	0.189415	-0.254345	-0.347058
200870_at	STRAP	-0.292192	-0.438812	-1.00114	-0.740511	-0.262564	0.00350761	0.257483	0.222588	-1.6336	-0.118622	0.00360775	0.207072	0.157499	0.291252	0.325834	0.274921	-0.126993	-0.13394	0.0692339	-0.00350761	-0.0302391	0.130688	0.0766306	-0.000736	0.501998	-0.827426	-0.228869	0.586554	0.480721	-1.20629	-0.502138	0.000736	0.296037	-0.510864	-0.118835	-0.97472	0.224083	0.793956	0.731513	0.821511	0.763756	-0.149433	-2.48034	-0.364385	-0.0899572	-0.0143356	0.214361	0.192945
200871_s_at	PSAP	0.157254	-0.400128	-0.449583	0.113924	-0.0706654	0.459566	0.229217	-0.000508	-0.377069	-0.090394	0.000509	0.290034	0.245597	0.277734	0.0655785	0.146283	-0.186269	-0.0701008	-0.301828	-0.222856	0.0680609	-0.0626574	-0.0166788	-0.230539	0.456576	-0.0797682	0.329564	0.000531	0.183337	-0.872903	-0.22569	-0.440368	0.076642	0.345851	-0.0371056	-1.08824	-0.000531	0.0730925	0.34538	0.227519	0.315738	-1.16861	0.141909	-0.0409813	-0.0226755	-0.0271635	0.33878	0.263495
200872_at	S100A10	0.417068	-0.340617	0.471199	0.177828	0.0346003	-0.858108	-0.0346003	-0.523727	0.122064	-0.069211	0.748075	-0.391433	-0.627589	-0.167449	0.672529	0.395739	-0.650939	-0.274574	0.447459	0.272311	-0.0500326	0.533766	-0.079813	1.39102	0.650359	1.26757	0.144664	0.22112	-0.347989	0.781094	-0.0729818	0.477962	0.288068	-0.353586	-0.28058	-1.90036	-0.374296	0.0276461	-0.0276461	-0.273064	0.106954	1.09741	-1.3842	-0.150755	0.230689	1.35377	-0.155945	-0.429256
200873_s_at	CCT8	0.0645742	-1.42752	-0.750185	-0.586345	-0.0340958	0.0135107	0.172264	0.184114	-1.01294	-0.368752	-0.0358734	0.110526	-0.0407534	0.0941753	0.1046	0.123445	0.337479	-0.0135107	-0.06954	-0.322543	0.073885	0.110675	0.0541401	0.228276	0.216062	-0.380591	-0.273903	0.00416946	0.031517	-1.04378	-0.353002	0.0940952	-0.0978985	-0.375372	0.0863399	-2.16278	-0.48821	0.343867	0.228972	-0.00416946	0.184878	-0.879084	-1.00969	0.0655527	-0.390001	-0.0836353	0.147931	-0.0473347
200876_s_at	PSMB1	0.143032	-2.02117	-0.874162	-0.156426	-0.0703621	0.244306	0.690418	0.614723	0.260122	-0.0584316	-0.116496	-0.491343	-0.782043	-0.728708	-0.752811	-0.71645	0.115477	0.0584316	0.293207	0.384106	0.0851622	0.101652	0.84521	0.289653	0.0320911	0.799116	-0.0320911	0.820381	0.83918	0.328615	-0.737582	0.141734	0.30965	-0.520608	0.244598	-2.50325	-0.234734	-0.034255	-0.219538	-0.470563	-0.578521	-0.127002	-0.672773	1.20445	0.377744	0.402143	-0.018631	-0.237213
200877_at	CCT4	-0.0798235	-2.13817	-0.768482	-0.0137339	-0.0931873	0.113516	0.340625	0.20705	-0.643021	-0.160595	-0.301978	-0.0731201	-0.0859318	0.07444	0.147411	0.164614	0.292927	-0.0185471	0.0879755	0.0137339	0.0476856	0.0249805	-0.131849	-0.0026865	0.772516	-0.278683	0.651041	0.216352	0.295136	-0.951336	-0.769732	0.0026865	0.068965	-0.629959	-0.0748243	-2.56572	-0.139584	0.282857	0.281617	0.448864	0.282203	-1.32889	-2.09302	0.00631332	-0.266015	-0.318267	-0.0749464	-0.0477324
200878_at	EPAS1	-0.352573	0.143591	-0.280776	0.0997496	-0.402324	-0.164669	-0.461638	-0.395718	0.462613	0.922252	0.37538	1.06706	1.17746	1.49196	1.4576	1.73523	-0.812256	-0.371599	1.81233	-0.6251	-0.0997505	-0.532378	0.0560007	-0.484174	-0.0115824	0.399093	0.113339	0.0298843	-0.300264	-0.246331	-1.34285	0.0115824	0.348365	-0.0610237	-0.583507	-1.74875	-0.334059	0.583041	0.216513	0.0132036	0.343959	-1.01968	-0.909403	0.316937	1.15349	0.543515	1.37469	1.41932
200879_s_at	EPAS1	-0.159686	0.783369	0.344726	0.0718584	0.0476685	-0.0409923	-0.352224	-0.322856	-0.223485	-0.142812	0.118186	-0.167331	0.162993	-0.07021	0.23665	0.0446639	-0.039351	-0.0182314	-0.236405	0.0182314	0.0885744	0.0699663	-0.305859	0.062562	-0.416394	-0.242286	-0.443361	-0.286877	-0.286126	-0.546713	-0.0939698	-0.430687	0.195136	0.535193	0.171429	0.781241	0.160369	0.0124383	0.00693083	-0.00693083	0.0324206	-0.261419	0.333103	0.0362978	-0.263315	0.0186868	-0.345387	0
200880_at	DNAJA1	-0.397406	-0.0225573	-0.746324	-0.837004	-0.365869	0.122375	0.244091	0.0172853	-0.361792	-0.0868788	-0.167953	0.0212917	0.0170441	0.235843	0.396098	0.070157	0.326566	0.0554895	0.0360727	-0.0170441	-0.0408573	-0.0295324	-0.131243	-0.447058	0.0591755	-0.865461	-0.41329	0.140409	-0.0591755	-0.860712	0.579109	0.939808	-0.355876	0.0781593	0.155473	-1.88631	-0.186556	0.239914	0.200624	0.106575	0.675728	-0.232553	-1.31173	0.107428	-0.0328007	-0.133184	-0.00802136	0.0785198
200881_s_at	DNAJA1	-0.0813951	-1.65738	-1.15203	-0.71949	0.423583	-0.264213	0.735499	0.43995	-0.501662	-0.476209	-0.154189	0.270965	-0.106555	0.0682259	0.437348	-0.212693	0.116601	-0.0682259	0.245693	0.0940752	0.0899324	0.666262	0.00154018	-0.0674	-0.0127039	0.242379	-0.376796	0.890513	0.485782	-0.568225	-0.483642	0.177812	0.211669	-0.818289	0.0522423	-2.49535	-0.290687	0.530367	0.799537	-0.00154018	0.576114	-1.97731	-1.25697	0.453464	-0.472783	-0.131952	0.320028	0
200882_s_at	PSMD4	0.0785418	-0.814854	-0.372543	-0.425874	0.0769978	0.127517	-0.237275	-0.00252628	-0.163237	0.168582	0.422489	0.0260315	0.0128517	0.00252628	-0.0409479	-0.120755	-0.458471	-0.137256	-0.165074	0.489468	0.295118	0.0853023	0.198507	0.622425	-0.0138054	0.263033	0.156796	-0.339465	-0.0134525	0.200966	-0.925793	-0.6698	0.779968	0.0353127	0.342834	-0.869309	-0.336859	-0.215281	0.0134525	-0.396719	-0.241865	-0.0309982	0.659052	0.717712	0.173598	0.440378	0.0569439	0.0230846
200883_at	UQCRC2	-0.568208	-3.68121	-3.22191	-0.523193	0.299007	1.21323	1.61279	1.59415	0.771402	0.31461	0.0550537	-1.17816	-1.53508	-0.964004	-1.15667	-0.60846	0.737528	-0.100943	0.411948	-0.0550537	0.600771	0.113122	1.98743	-0.768071	1.03792	-1.03245	-1.14876	1.5228	1.17463	0.519104	0.103705	1.12749	0.270946	-3.01592	-0.454254	-4.00425	0.189163	-0.114086	-0.249085	-0.103705	0.179668	-1.67425	-0.904682	1.73019	0.322619	0.0164118	-1.26971	-1.59404
200884_at	CKB	-0.299659	0.0633426	-0.237527	-1.04829	-0.0633426	0.257559	0.53247	-0.694974	0.615609	0.301777	0.813878	-0.151448	-0.392703	0.194913	-0.57575	-0.271373	-0.745514	0.19203	0.0776887	0.800047	-0.0732989	0.460277	0.0980802	0.425763	-0.234938	-0.0432749	-0.554624	0.493569	-0.150171	0.637839	-0.437548	-0.54036	-0.402215	0.136567	-0.1907	-0.0586519	0.0432754	-0.532213	0.0968809	-0.173712	0.108271	1.037	0.829608	0.878252	0.17207	0.692309	-0.107414	-0.355392
200885_at	RHOC	0.538035	-0.427764	-1.06412	-0.46908	0.657917	0.620577	0.376005	0.236572	0.542194	0.0502443	-0.22398	-0.493742	-0.368614	-0.333122	-0.42701	-0.599953	-1.49479	0.15665	-0.0399656	0.498543	0.0399656	0.268588	-0.103569	0.343824	0.676466	0.560127	-1.34528	0.411176	0.237307	0.419579	-0.705228	-1.02836	0.60022	-0.254129	0.457691	-1.18964	-0.0411949	-0.0897713	0.0411949	-0.133804	-0.198392	-1.33914	0.365361	0.791457	0.229514	-0.163141	-0.317972	-0.186804
200886_s_at	PGAM1	-0.103139	0.00473785	-0.479797	-0.00473785	-0.181538	-0.0120907	0.0113764	-0.0505676	-0.382827	-0.0441208	0.0984097	0.227446	0.0878782	0.320172	0.185323	0.188081	-0.328478	-0.211766	-0.131184	0.00806236	0.0547819	0.192218	-0.1629	0.224483	0.325773	-0.0280705	-0.464446	-0.0483265	0.00374985	-1.14115	-0.223066	-0.311485	0.0516739	0.139656	0.16349	-1.61919	-0.00374985	0.389141	0.252768	0.476672	0.356662	0.225943	-0.0321293	-0.0097456	-0.0617914	0.000412	0.210887	0.00531769
200887_s_at	STAT1	-0.739878	0.335464	0.91407	0.103291	-1.35883	-1.13958	-0.28322	0.0248165	-0.897843	0.111785	-0.0248165	-0.201985	0.0652018	0.100083	-0.141374	0.387207	0.370145	-0.307733	0.288012	-0.488158	-0.033658	0.0255909	0.341861	0.402972	0.999254	2.1812	1.10065	1.11777	0.540278	-0.150615	0.303172	0.466356	-0.767253	-0.288361	-0.183715	-1.27499	-0.886721	0.142517	-0.460428	-0.519791	-0.142517	0.570214	-2.32583	-0.676912	0.592562	0.468664	0.295447	0.489093
200889_s_at	SSR1	0.0306454	-0.301682	0.619135	-0.342565	0.161197	0.376415	0.857785	0.325274	0.0167875	-0.42445	-0.263267	-0.0678792	-0.133189	0.103572	0.197412	-0.214983	0.445225	-0.0167875	0.19545	-0.293104	-0.046875	-0.489366	0.0527182	-0.00489807	0.561935	0.610797	0.37901	0.273248	0.0723638	-0.640842	-0.0939202	0.808366	-0.766397	-0.582602	-0.217285	-0.681393	-0.327388	0.197674	0.00489807	0.467708	0.453284	-0.551619	-0.459182	-0.646973	-0.13191	-0.143101	-0.0180297	0.0459599
200890_s_at	SSR1	0.235718	0.351944	0.26734	-0.524064	0.52144	0.376347	0.551723	0.109883	0.0928516	-0.28161	-0.314387	-0.116608	0.404246	-0.0928516	-0.266655	0.170661	0.382373	-0.57794	-0.262163	-0.592142	-0.412622	-0.0938721	0.245562	-0.581531	0.403753	-0.389803	0.0834079	0.0843658	-0.287469	-0.605708	0.849884	0.620273	-1.67801	-0.23808	-0.274464	-0.753633	-1.07291	-0.0468407	0.0468407	0.182473	0.43293	0.315087	0.323093	-0.317727	-0.366118	-0.339838	-0.149361	0.473073
200891_s_at	SSR1	0.360867	-0.0506239	0.0749826	-0.933378	-0.101604	0.0198421	0.393517	0.151534	-0.111069	-0.10728	0.197455	0.0160799	0.0523005	0.0624638	-0.0160809	0.362832	-0.0394764	-0.159299	0.271988	-0.354304	-0.352167	-0.519012	0.0743332	0.175253	-0.187383	0.0149336	0.550573	0.406102	0.386179	-0.627176	0.520234	0.782331	-0.871686	-0.329057	-0.128155	-1.5633	-0.775179	-0.0149336	-0.130999	-0.0882225	0.0590782	0.647257	-0.1896	0.057766	0.18327	0.493694	0.320379	0.397308
200892_s_at	TRA2B	-0.419002	-0.767637	-0.193419	-0.0654473	0.085609	-1.20576	0.315351	0.104397	-0.0603108	0.0379267	-0.498844	-0.076859	-0.096108	0.362612	0.264529	0.372694	0.798929	-0.0302129	0.547933	-0.0952253	0.0302129	0.167661	0.887206	-0.151553	0.678485	-0.0438685	-0.251534	0.575634	0.341197	0.534168	-0.34557	0.92776	0.0438685	-0.613663	-0.559855	-0.773848	0.264352	0.545592	-0.220217	-0.193299	0.329422	-0.206768	-1.0384	0.622247	0.0609851	-0.529291	0	-0.00172186
200893_at	TRA2B	-0.270161	-0.386512	-0.404243	-0.18221	-0.0867386	-0.522874	0.163589	0.0766764	-0.261867	-0.262377	-0.00518608	0.0914364	-0.112823	0.00518704	0.156661	0.196784	0.422697	-0.0398302	0.0532608	0.0574141	0.235803	0.338479	0.460743	-0.308416	0.118834	-0.271056	-0.122379	-0.00747585	0.184921	-0.591741	0.0262461	0.058197	0.00747585	-0.500968	-0.543678	-1.69101	-0.25425	0.321576	-0.109381	0.0402155	0.0938387	0.367892	-0.939465	0.0699854	-0.259323	0	0.10261	-0.0783148
200894_s_at	FKBP4	0.000519	-0.496979	-0.385806	0.0949898	0.632049	0.680937	0.750173	0.513701	0.55318	-0.137869	0.211479	-0.435094	-0.31677	-0.115643	-0.268832	-0.293709	-0.0923076	-0.117931	-0.000519	0.150442	0.02633	0.276117	0.858819	-0.225415	0.619873	-0.00545359	0.384824	0.702755	0.581792	0.144453	-0.175284	-0.0994515	0.00545359	-0.469427	-0.126597	-0.920219	0.0894546	-0.306721	0.157404	-0.180024	-0.109184	-0.149556	0.233397	0.7719	-0.00603867	0.166218	-0.267762	-0.280836
200895_s_at	FKBP4	0.313616	0.576098	-0.00221157	-0.481627	0.419148	1.10069	-0.206748	-0.381763	-0.273565	0.125278	0.315516	0.0385227	-0.0781069	-0.115813	0.00221157	-0.0659208	-0.606886	-0.110671	-0.739771	0.156651	0.0938501	0.041995	0.148211	0.038209	0.034936	-0.208756	-0.85669	-0.622243	-0.389772	-0.556921	0.426219	-0.616012	0.192453	0.508223	0.0849047	-0.0862494	-0.0396214	-0.101997	0.186457	0.0211506	0.0116348	-0.0116348	0.664309	-0.0796108	-0.00506401	0.134743	-0.0896893	-0.151226
200896_x_at	HDGF	0.436807	-0.178594	-0.238998	-0.24855	0.0833254	0.277717	-0.306995	-0.481206	-0.454869	0.361258	8.49e-05	0.00393772	0.142375	0.00649452	0.251246	0.160595	-0.399049	0.0448494	-0.546867	-0.421946	-8.49e-05	-0.338791	-0.451515	0.825101	0.542748	-0.149813	0.130592	-0.114587	-0.085103	-0.685765	-0.555342	-1.00656	-0.0433807	0.63299	0.774614	-0.0829573	0.0299482	0.505962	0.683825	0.331801	0.335448	-0.0299482	0.197528	-0.0860043	0.336194	-0.0535555	-0.0134563	0.0750122
200897_s_at	PALLD	-1.30974	0.327032	-0.850023	-0.799901	-1.40337	-0.685481	-0.667228	-0.634661	-0.964158	-0.172819	-0.0493736	0.343797	0.162569	0.503737	0.222014	0.317629	0.47763	0.0493736	0.364717	-0.516083	0.121479	0.0644407	-0.246759	-0.0356598	0.543101	0.857251	0.28541	0.611668	0.0979938	0.0356598	0.258478	0.304287	0.218489	0.742273	-0.433694	-1.32588	-0.385981	0.230567	-0.356751	-0.174173	-0.0617838	-0.425856	-2.80651	-0.578963	0.339115	0.423919	0.856877	0.690964
200898_s_at	MGEA5	0.232245	-0.457708	0.177834	-0.263872	-0.163875	0.0458279	-0.0720329	0.0995092	0.0345945	-0.0253448	0.0253448	-0.365761	-0.164104	0.213389	0.141284	-0.249703	0.1774	0.237542	-0.28248	-0.325176	0.126718	-0.199096	-0.0260472	-0.0622125	0.11106	-0.61318	0.0260472	-0.164765	0.047637	-0.567029	-0.102475	0.754945	-0.429619	0.365199	0.479171	-0.299327	0.199031	0.0886493	0.233258	0.586238	0.284465	-1.26492	-0.678451	-0.080337	0	-0.187854	-0.518205	-0.246379
200899_s_at	MGEA5	0.0360022	-0.585333	0.380278	0.0407858	-1.00014	0.078228	0.39141	0.446059	-0.805283	-0.0360022	-0.0451088	-0.0679855	-0.0551672	0.0444155	-0.196811	0.142785	0.500064	0.285972	0.179727	-0.563305	-0.223632	-0.49781	0.646258	-0.715595	0.795781	-0.721422	0.0712204	0.217154	0.329253	-0.919864	0.781654	1.27526	-0.501804	-0.0729036	-0.380091	-1.79937	0.0202351	-0.0134134	0.0134134	0.390469	0.128897	-0.965645	-1.65517	-0.661933	0.0091095	-0.0777454	-0.0239639	-0.00308228
200900_s_at	M6PR	0.700384	-0.366659	-0.389238	-0.0557513	1.11944	0.324212	2.22532	1.94038	0.541123	0.735622	-0.36347	-0.474292	-0.680038	-0.967365	-0.589719	-0.523755	0.77659	-0.0514779	0.0514774	0.149323	0.246216	-0.463361	1.58772	-0.101715	1.01369	-0.0686774	0.53763	1.81831	1.81683	1.26226	0.963349	1.03353	-0.57436	-0.694532	0.224255	-0.218359	-0.265041	-0.435862	-0.503371	-0.198956	0.068677	-0.884719	-0.309911	1.47857	0.846463	-0.416115	-0.42574	-0.522018
200902_at	44819	-0.244225	-0.786907	-0.780978	-0.407208	0.00886249	0.127351	0.358376	0.63094	-0.00886249	-0.340145	-0.506157	0.0091238	0.0122538	-0.30669	-0.0626211	-0.260355	0.395329	-0.316948	0.318334	0.0298576	0.0777836	0.136514	0.403627	-0.137595	-0.12571	0.0257654	-0.189653	0.635942	0.267943	0.121396	-0.0257654	1.08717	0.0519362	-1.03251	-0.352098	-2.30948	-0.297742	0.210282	-0.0537634	-0.0708799	0.448624	0.107746	-1.70866	0.524697	-0.274867	-0.250546	0.0332851	0.112133
200903_s_at	AHCY	0.531832	-0.811674	-2.33504	-1.67498	0.187543	0.93679	0.593079	1.19741	-0.31411	0.268431	0.224075	-0.430311	0.121153	-0.518337	0.0663166	-0.862638	-1.84208	0.537838	-0.471428	0.31909	-0.0663166	-0.361139	0.438065	0.0465469	-0.0640097	-1.46301	-1.75373	0.379456	1.05453	-0.497332	-1.37679	-1.61798	0.91605	-0.118412	1.39514	-1.86463	-0.0561028	0.202192	0.728382	0.33957	0.715275	-2.19424	-0.0465469	0.811163	0.171734	0.0482311	-0.487543	0
200904_at	HLA-E	-0.424304	-2.34152	-1.42656	0.0310507	-0.875443	0.102931	-0.0310507	0.196159	0.647841	0.666122	-0.0668907	0.064805	0.15514	0.600196	0.512367	0.250337	-0.530496	-0.119232	1.39725	-0.287859	-0.13078	-0.0470781	0.291117	0.204296	0.929139	1.47451	1.71581	0.67136	0.556025	0.9793	-0.612494	0.372357	-0.339296	-0.813293	-0.365668	-1.91166	-1.15274	-0.0264368	-0.124499	-0.328656	0.0264368	-1.15258	-0.797175	0.478562	1.3802	0.56062	0.71502	0.887937
200905_x_at	HLA-E	0.126372	-1.77587	-0.641072	0.513756	-0.664982	-0.980435	0.496704	0.631875	0.192272	0.832074	-0.0208178	0.0208178	-0.0251093	0.447709	0.334278	-0.34935	-0.749495	-0.330346	1.05953	-0.562705	0.124902	-0.435127	0.228931	0.806296	1.02483	1.79352	1.72508	1.17803	1.2299	0.242821	-0.466314	0.0707321	-0.403781	-0.437782	-0.422075	-1.70667	-1.03659	-0.428849	-0.0707321	-0.487214	0.11836	-1.09346	-0.550625	0.128694	1.45914	0.607516	0.656205	0.642114
200906_s_at	PALLD	-0.469968	-1.7206	-0.67355	0.033658	-1.5074	-1.74611	0.144085	-0.433638	-0.0336585	1.19664	0.905236	2.16895	1.40027	1.08781	1.42143	-0.119266	-0.101436	1.27004	1.85	-0.100462	0.122121	-0.273366	-0.449834	-0.495758	-0.174673	1.13865	0.302211	0.93327	0.273391	0.690539	0.3413	-0.116694	1.25595	0.13654	0.0166807	-0.637015	-0.305676	-0.0166807	0.390954	-0.297572	0.0681658	-0.062674	-0.318666	-0.247398	1.39664	1.03704	2.37379	1.58929
200907_s_at	PALLD	-0.494298	-1.26869	-0.420438	-0.705672	-1.11273	-1.14878	1.24909	0.624339	-0.318769	0.963684	-0.0128517	0.426046	0.198792	0.0128517	-0.132744	-0.288212	0.350988	-0.231266	0.196495	0.280512	0.903074	0.0962162	0.0306873	-0.0708437	-0.252097	0.531724	0.465973	2.1426	1.20824	0.583898	0.275507	0.552568	0.0308228	0.38392	-1.1855	-1.04534	-0.750258	-0.238646	-0.350585	-1.25503	-1.05373	-0.0306873	-0.793912	0.240236	1.37898	0.223378	0.715888	0.538064
200908_s_at	RPLP2	0.193012	1.74546	1.2165	0.914453	-0.231283	-0.69217	0.0790768	0.169569	-2.00446	-0.824146	-0.842588	-0.0790768	0.743902	0.716339	0.321618	0.764248	1.6901	-0.770335	-1.21643	-0.953701	-1.94357	-1.03412	-0.947899	0.183429	-0.112878	0.53396	2.51113	-0.208457	0.112878	-2.29723	-1.01867	-0.892198	0.53813	1.2288	-0.564651	0.149114	-0.391974	0.17442	-0.144877	0.119628	-0.285305	2.24024	2.78079	-0.958531	-0.774146	-0.393135	-0.0373259	0.98696
200911_s_at	TACC1	0.000639	-0.0761805	0.10112	0.651347	-0.218283	-0.143359	-0.000639	-0.116721	-0.255307	0.320537	-0.223732	0.54371	1.14928	1.18073	1.21989	1.15792	-0.0564728	-0.190331	0.525499	-0.0618811	-0.0273991	0.0810242	-0.337483	-0.523815	0.495525	-0.00117397	0.301979	-0.275346	-0.720715	-0.323432	-0.242625	0.333105	0.201988	0.00117397	-0.359014	-1.48898	0.0697603	0.168623	0.780107	0.367651	0.792611	0.775879	-2.00924	-0.0217533	0	-0.526922	0.21608	0.824632
200913_at	PPM1G	-0.183295	-0.298335	-0.37256	-0.0510063	0.190844	-0.0794482	-0.0168037	-0.0663247	0.54072	0.146209	0.0168037	-0.211211	-0.561593	0.0902305	0.033289	-0.357077	-0.771246	0.400568	0.155755	0.1374	0.122625	0.13272	0.358635	0.152826	0.0711913	0.414986	0.386253	0.0442939	0.104475	0.860412	-0.101364	-0.412426	-0.120679	0.130333	0.00594711	-0.91763	-0.560665	-0.267015	-0.012794	-0.00594711	-0.351323	-0.705307	-0.626666	0.818728	0.197522	0.147451	-0.109655	-0.414602
200914_x_at	KTN1	0.407108	-0.880661	-0.0183506	-0.206347	1.19691	-1.03899	0.0183506	-0.187145	0.322238	0.457637	0.142014	0.271354	0.173165	-0.06495	-0.293162	-0.332986	0.601578	-0.821461	-0.691224	0.225244	0.0481253	-0.269475	0.734851	-0.217816	-0.821287	-0.765495	0.104904	-0.111917	-0.178778	-0.446658	0.812667	-0.00425911	0.121068	0.678245	0.207586	-0.523573	-0.750734	0.00425911	0.0340681	-0.429204	0.0418434	0.753678	0.658911	-0.218124	0.255829	0.0843658	0.0825567	0.0222483
200915_x_at	KTN1	-0.365918	-0.452226	-0.670556	-0.917813	0.906775	-0.233962	-0.147132	-0.457985	-0.253812	-0.141176	-0.160069	0.0234528	0.234161	0.111994	0.0944776	0.0905457	0.433943	-0.0234528	0.24128	0.161903	0.0874243	0.0720444	0.583533	0.0142107	-0.271376	-0.0588703	0.454856	0.325879	-0.0583649	-0.358153	-0.139538	-0.171661	-0.00447941	-0.321073	0.422764	-1.54492	-0.244488	0.00447941	0.0543365	0.0450506	0.168154	0.373976	-1.0711	0.453724	-0.0200901	-0.0195141	0.127701	0.394243
200916_at	TAGLN2	1.0062	-0.0333261	-0.512032	-0.337822	0.0440044	0.665221	1.2326	1.07168	1.24881	0.4401	0.547998	-1.05692	-0.749398	-0.48105	-0.194024	-0.628536	-0.601263	-0.238973	0.271041	0.520723	0.0333261	-0.215346	0.104227	0.812013	0.65662	0.0442314	0.328528	0.677805	0.4051	0.979217	0.198128	-0.556169	-1.04263	0.282569	-0.4596	-0.418548	-0.543056	-0.708591	-1.21939	-1.05749	-0.517139	-0.0442314	-0.0750742	0.914417	0.719325	0.735755	-0.841611	-0.597353
200917_s_at	SRPR	0.958421	0.149209	2.06874	0.0633044	-0.585593	-0.641397	-0.865704	-0.85932	-0.95442	1.43297	0.386072	0.139966	0.727729	0.927793	-0.0633044	-0.584527	-0.531196	0.174959	0.0724092	-0.702582	-0.635704	-0.352229	-0.712179	0.53436	0.479568	0.70481	0.0878625	-0.468425	-0.642187	-1.22441	-0.295218	-0.652204	-0.0878625	0.59492	0.512033	0.266822	-0.199334	0.167217	0.419313	0.319084	0.850923	-1.23112	-0.507817	-1.10409	1.247	0.061748	-0.0426421	0.618602
200918_s_at	SRPR	-0.0579653	-1.07	-0.252154	-0.692537	-0.0141211	0.752263	-0.0177288	0.245601	-0.278439	-0.0457668	-0.119884	0.138844	0.0141211	0.0807161	0.262578	0.147227	-0.783142	0.0225077	0.130879	-0.347111	0.201325	0.124211	0.330094	-0.355556	0.0886478	0.221914	1.09998	0.465704	0.127981	-0.809986	-0.250286	-0.763197	-0.702681	-1.08606	-0.473282	-1.01438	-0.0886478	0.363533	0.436662	0.270322	0.583065	-0.366742	-0.486087	0.281743	-0.0293865	-0.154509	0.0707989	0.0551491
200919_at	PHC2	0.445379	-0.137414	0.256482	-0.0778141	0.698225	0.338208	0.246944	-0.385008	0.178802	0.00741577	-0.113614	-0.422969	-0.251104	-0.333101	0.0870323	-0.00741577	-1.12789	0.299517	0.539681	-0.181666	0.15432	-0.362253	-0.246876	0.723981	-0.01511	0.322477	0.297448	0.602472	-0.0768995	0.100479	-0.582068	-0.425503	-0.27307	0.0676851	0.124632	-0.225391	0.151163	-0.0299492	0.0691032	-0.259744	-0.250898	0.361714	-0.0613518	0.01511	0.127964	-0.0698538	-0.359324	-0.256523
200920_s_at	BTG1	0.495846	-2.30378	-0.841151	1.06575	-0.220997	0.05095	0.328868	0.848089	1.01466	0.0487947	0.337394	-0.732494	-0.395654	-0.946014	-0.371393	-0.645603	-0.856505	0.661773	1.03542	0.083663	-0.0487947	-0.532832	-1.58612	0.293211	0.00968933	0.861051	0.754267	0.0271616	-0.00968933	1.55802	-1.12204	-0.0268106	-1.86155	-0.182638	0.324512	-1.59642	-0.347886	-0.251587	0.0894337	-0.180589	0.157011	1.26959	-0.196153	1.48204	0.170382	0.440374	-0.618001	-0.252933
200921_s_at	BTG1	-0.0174599	-0.0355797	0.253783	1.04287	-0.787415	0.465557	1.51831	1.56061	0.168216	0.0347834	-0.0647697	-0.884054	-0.325964	-0.0813856	-0.136837	0.283915	0.630825	-0.489088	0.105489	-0.52009	-0.561267	0.0174599	-0.0883884	-0.301397	0.268263	0.241468	0.89632	0.97323	0.725643	-0.0359192	0.120239	1.07716	-0.0300541	-0.00681114	-0.216463	-1.68916	-0.298452	-0.0784626	-0.332222	0.00681114	0.246281	1.34309	-3.07824	0.60623	0.0492897	-0.119472	-0.934994	-0.572624
200922_at	KDELR1	0.0682364	0.0432587	0.40865	0.341702	-0.221561	0.0360632	0.748663	0.633047	0.0490055	-0.109643	-0.00380135	-0.534413	0.00380135	-0.203724	-0.303263	0.0480824	-0.433875	-0.180143	-0.156404	-0.262893	-0.103889	0.0176153	0.0596724	-0.138392	0.351616	0.547881	0.0638433	0.442612	0.0917339	0.0550938	-0.432684	-0.424674	0.273656	0.0451756	-0.0451756	-0.1267	-0.529399	-0.154451	-0.0504513	-0.12206	-0.135234	-0.264354	1.13577	0.313308	-0.0676732	0	-0.320072	-0.00747919
200923_at	LGALS3BP	0.331532	-2.2095	-1.16425	-0.575089	-0.422627	0.454013	-0.291986	-0.697808	0.183844	0.222224	0.43858	-0.173919	0.00861168	0.240549	0.0895386	0.172092	-1.19109	-0.00861168	0.808222	-0.292954	0.203086	-0.232433	0.16301	1.10286	1.08595	0.998147	0.764172	0.343593	0.630267	0.569998	-0.714133	-0.680737	-0.83491	-1.14581	-0.329757	-0.890459	-0.376955	-0.387633	-0.223055	0.0743351	-0.0743351	-0.170237	0.310027	0.877909	0.554274	0.908189	0.132727	0.428442
200924_s_at	SLC3A2	0.243805	-1.13528	-1.56179	-0.751296	0.829144	1.55257	0.490162	-0.248296	0.52564	0.130349	-0.353192	-0.570613	-0.0714474	-0.084527	0.0129347	-0.0129347	-1.61794	0.609211	-0.092082	0.0729418	0.440571	0.0644074	1.13391	-0.223686	0.253821	-1.74347	-1.05147	0.0728121	0.0709448	-0.363136	-0.088747	-0.674609	-0.0709448	-0.587326	0.374366	-0.773299	0.385768	0.380797	0.482897	1.00267	0.532139	-1.9781	-1.18223	0.963176	0.0933809	-0.369178	-0.613995	-0.063838
200925_at	COX6A1	0.505838	0.300937	-0.827024	-0.611022	0.825834	0.0284958	-1.56563	-1.48855	0.476845	0.106654	0.444057	-0.625862	-0.189991	-0.775226	-0.559529	-0.103471	-0.921732	0.118189	-0.0284958	0.813937	0.0381346	0.141652	0.627928	0.644199	-0.0524244	0.0178118	-0.672191	-1.04818	-0.985022	-0.195913	-0.367701	-0.875592	0.21948	0.252359	1.13326	-0.827034	-0.0660076	0.0459661	0.178653	-0.106999	-0.0178118	0.585731	0.873601	1.04328	0.188404	0.65042	-0.410741	-0.110011
200926_at	RPS23	0.21951	0.0156899	0.108046	0.2681	0.147647	-0.141881	-0.0156899	0.129084	-0.402513	-0.0459452	0.0362501	-0.177588	-0.101167	-0.16713	-0.0696936	-0.0320444	-0.430899	0.207193	0.0315943	0.0683374	-0.0226278	0.0785856	0.00466728	0.255171	0.146833	0.260049	0.00337219	-0.113458	0.000319	-1.08651	-0.317434	0.200994	0.0781612	0.2183	0.18045	-1.70471	-0.000319	-0.0051136	-0.0799866	-0.0474796	-0.0608549	0.162061	-0.529395	-0.049758	0.00537491	0	-0.157102	-0.11183
200927_s_at	RAB14	-0.35744	-1.20882	-0.123151	0.0481277	-0.299501	0.38352	2.04092	1.81564	-1.41453	0.533174	-0.0851541	0.504794	0.471188	0.615423	0.498623	0.798339	-0.565114	-0.0598001	0.474673	-0.295372	-0.323088	-0.0481277	0.737742	-0.916695	0.476226	-0.448861	0.143412	1.87587	1.36733	-2.01054	-0.105049	1.10645	-0.423339	-1.62691	-0.547449	-1.8799	0.615272	0.674725	0.105049	0.334042	0.415077	-0.267642	-1.87866	-1.3567	0.565525	-0.104668	0.386527	0.386505
200928_s_at	RAB14	-0.252023	0.475934	-0.0594187	-0.277648	-0.613364	-0.871911	-0.26402	0.0594187	-0.230966	0.113181	0.535406	0.702644	0.511457	0.946895	0.440344	1.17209	1.03165	-0.419299	-0.323894	-0.221082	-0.198202	0.615246	0.591945	-0.476319	-0.00372839	0.0579767	-1.29655	-0.259446	-0.653413	-0.379086	0.576498	0.659332	-0.549402	0.159719	0.0309224	-0.459742	0.208892	0.455451	-0.238295	-0.176466	0.550525	0.575162	0.00372791	-0.0542936	0	0.428589	0.401721	0.247535
200929_at	TMED10	0.282447	0.123733	0.0628252	-0.233077	-0.0135736	0.53063	0.859743	0.581902	-0.433663	-0.0842075	-0.0977507	0.257691	0.236203	-0.0579338	0.0135736	-0.122686	0.0263796	-0.0185337	0.208811	-0.438835	-0.184435	-0.126662	0.122014	-0.110929	0.100347	0.0969419	0.336817	0.541207	0.328306	-0.63306	-0.351137	0.455739	-0.367596	-0.816049	0.0434599	-1.44373	-0.335186	0.107751	-0.0580997	0.034543	-0.034543	0.50312	-1.54404	-0.325369	-0.0266342	-0.00225449	0.299242	0.292299
200930_s_at	VCL	0.355577	0.166725	0.279798	-0.36304	-0.000497	-0.118297	0.194625	0.000497	0.151456	-0.311195	-0.110633	-0.112618	-0.0312715	-0.0625162	0.288826	0.184272	0.240306	0.114574	-0.0238895	0.0573549	-0.232992	-0.156061	0.142303	0.232079	-0.000688	-0.027101	-0.144791	0.000688	-0.110242	0.312579	0.418546	0.0150242	-0.512125	-0.215876	-0.210924	0.500952	0.111828	-0.192045	-0.0726619	-0.0356059	0.204195	0.118438	0.28357	-0.148473	-0.0840201	-0.0741186	-0.024806	-0.0278363
200931_s_at	VCL	-0.413294	-1.05619	-1.5828	-0.48422	-0.659558	-0.324344	0.556632	0.211942	-1.2946	0.365605	-0.219476	-0.212062	-0.0276928	0.324007	0.498476	0.606554	0.146899	0.0276928	0.136055	-0.0922804	0.0661154	0.0851393	-0.153749	0.171756	0.17648	0.303164	1.13474	1.48841	0.941248	-0.675251	-0.0391922	0.828706	-0.884759	-0.302465	-0.504372	-1.81556	-0.784609	0.00655365	-0.00655365	0.0351744	0.401834	0.530253	-1.09152	-0.73828	0.551431	0.0009	-0.0469761	0.134924
200932_s_at	DCTN2	0.235271	0.414512	-0.378658	-0.225279	0.0693588	0.296433	0.03759	-0.171139	0.0202322	-0.225483	0.200861	-0.246801	-0.111949	-0.0202322	-0.117796	-0.419877	-0.152231	0.285441	0.234909	0.146194	-0.0326653	0.164827	-0.0118599	0.307021	0.376957	0.297062	0.173986	0.139547	-0.196814	0.1963	-0.00773621	-0.423159	-0.105835	0.559832	0.0956593	-0.401311	-0.606051	-0.529491	-0.0407009	-0.173628	-0.0520058	0.00773621	0.855434	0.0474339	-0.0643196	0.210476	-0.23435	-0.0559626
200933_x_at	RPS4X	0.366834	-0.274961	-0.116557	0.449279	0.166266	0.071352	0.256451	0.465662	-0.112261	0.119424	-0.0796623	0.00780773	-0.38132	-0.478245	0.0125847	-0.0252171	-0.581282	0.00976276	-0.0456238	-0.00780773	0.135126	-0.0338383	0.27838	0.195621	0.266688	0.417519	0.0458946	0.133314	0.177424	-0.752122	-0.225929	0.385348	0.141847	-0.604042	-0.0458937	-2.32003	0.0733633	-0.158633	-0.325533	-0.325705	-0.128469	0.189245	-0.330363	-0.284671	0.155643	-0.0882092	0.000393	-0.374414
200934_at	DEK	-0.379595	-0.526193	0.0668669	0.449095	-0.328918	-0.619294	0.284934	0.00845432	-0.579699	-0.319692	-0.348786	-0.00845432	-0.133996	0.18471	0.0729771	0.351397	0.853546	-0.0523767	-0.0206814	0.120294	0.239727	0.217147	0.342159	-0.205939	0.302181	0.109137	0.514451	0.223002	-0.0269375	-0.439376	0.738561	0.923875	-0.0297241	-0.887943	-0.526874	-2.39882	0.0269375	0.0897903	-0.277785	0.195885	0.223702	-0.319141	-2.8502	-0.141062	-0.213525	-0.26602	0.0603189	-0.0349131
200935_at	CALR	0.186847	-0.089252	-0.232357	-0.299532	0.170161	-0.240623	-0.275635	-0.533281	-0.069633	-0.0847411	0.269124	0.32667	0.297971	0.259912	0.069633	-0.153662	-0.308126	0.318618	0.532636	-0.120559	0.17951	0.167253	-0.397662	0.077569	-0.452194	-0.0374069	0.215209	-0.177083	-0.578469	0.00437975	0.0314593	-0.724208	-0.00437975	-0.0339646	0.518512	0.394354	-0.0456791	-0.0166192	0.03581	0.703572	0.668064	-0.0784221	1.06271	0.66462	-0.118897	0.0956535	0.138611	0.238729
200936_at	RPL8	0.272732	-1.13967	-0.827995	0.25618	0.176212	0.216814	-0.121516	0.130208	0.812049	-0.027688	0.154192	-1.15915	-1.28768	-1.45486	-1.27347	-1.37574	-2.73049	0.309481	0.170012	0.401519	0.027688	-0.210958	1.1134	0.638479	1.4218	0.622622	-0.279457	-0.21085	0.0959816	0.591315	0.593418	0.997348	0.444377	-0.0959816	0.774173	-2.43339	-0.194644	-0.80487	-0.513199	-1.03718	-0.366565	-0.334211	-0.257463	1.28661	0.39792	0.471077	-0.642606	-0.851489
200938_s_at	RERE	-0.146637	-0.0224819	0.329515	0.267591	0.223978	0.208505	-0.0287733	-0.135367	0.569318	0.0251455	0.157462	-0.0469618	-0.0610356	-0.176755	0.0839529	0.0199595	-0.140802	-0.184518	-0.0980792	0.226472	-0.0199595	0.0622673	-0.0143604	-0.168358	-0.23342	0.100757	0.329355	-0.120395	0.0143604	0.0954781	0.0545673	-0.123642	-0.102483	0.430176	-0.0329819	0.440313	-0.125367	-0.251532	-0.289528	-0.0520172	0.0381126	0.346085	0.897798	0.0868807	0	0.0189347	-0.15117	-0.151942
200939_s_at	RERE	-0.104845	0.384699	-0.143998	0.260848	0.173752	-0.258443	-0.0170183	-0.0624237	-0.00297832	-0.00038	-0.0417261	0.00734615	0.103002	0.0719538	0.00142193	-0.0390182	-0.275663	0.308455	0.00038	-0.0169473	0.178661	0.00038	0.128487	-0.00453758	-0.359649	0.196825	-0.236058	-0.070159	-0.0996928	0.10052	-0.198025	-0.18367	-0.273064	-0.00453758	-0.132522	0.386679	0.356513	0.199327	0.368346	0.0497856	0.0737007	-0.0166337	0.105311	0.00453758	-0.00218725	-0.00544214	-0.0251646	-0.00496197
200940_s_at	RERE	-0.227024	-1.5302	-1.12354	-0.420153	-0.263483	0.597202	-0.327282	-0.375791	-0.66637	0.644441	0.136646	0.0572796	0.230738	0.368247	0.224193	0.661346	0.368958	0.114787	0.32146	-0.933927	-0.0572796	-0.532405	0.332362	0.118904	0.890257	-0.427555	-0.491871	-0.0128393	0.0128393	-1.03585	0.11911	0.214331	-0.503675	-0.501495	-0.0684566	-1.22125	0.0408983	0.421765	0.180122	0.433246	0.0767012	-0.822258	-1.79543	-0.635442	0.429583	0.0356312	0.0362177	0.139117
200941_at	HSBP1	-0.255229	-0.457186	0.0129442	-0.88433	-0.0129442	-1.06715	-1.08718	-0.895844	-0.576205	-0.392478	0.0596066	0.592647	-0.196383	0.194722	0.076108	0.20123	-0.367477	0.131195	0.100868	0.305289	0.220477	0.431789	0.18432	0.223226	0.232262	-0.346878	-0.208542	-0.282861	-0.378066	-0.370912	-0.0375986	-0.122479	0.391973	0.0375986	-0.155925	-1.26368	0.15002	0.485307	0.112085	0.283385	0.217726	0.736793	-0.344341	-0.354641	-0.293781	0.181789	0.648667	-0.11659
200942_s_at	HSBP1	0.823706	0.230965	-0.114447	-0.57672	0.453319	-0.0164824	-0.205079	0.131664	-0.507216	0.256615	0.647206	-0.505867	-0.233808	-0.298847	-0.10128	-0.215944	-0.36609	0.282393	0.263388	0.546521	0.0164824	0.450125	-0.0308094	1.14643	-0.122857	0.539277	0.0907345	0.169823	0.247512	-0.195478	-0.396247	0.00571918	0.366349	0.0308256	0.678555	-0.960183	-0.00571918	-0.598038	0.369894	-0.0718355	-0.126658	1.43337	-0.0494766	-0.509922	0.438312	0.858022	-0.288968	-0.00492001
200943_at	HMGN1	-0.189963	-0.313891	-0.142858	0.100122	-0.326304	0.338057	0.340649	0.277844	-1.02407	-0.183496	-0.0586109	-0.0825453	-0.25313	0.0245533	-0.562	0.0711231	1.21115	-0.0245533	0.305388	0.104307	0.209634	0.290866	-0.0303793	0.0871773	0.752459	-0.0556726	0.232332	0.614145	0.342917	-1.03161	0.312085	0.331832	-0.0463819	-0.0908499	-0.578637	-2.42145	-0.556386	0.183209	-0.347086	0.142357	0.0303793	0.411549	-2.23739	-0.753105	-0.0483313	0.074151	0.0638752	-0.174864
200945_s_at	SEC31A	-0.125227	0.0150661	-1.13534	-1.52742	-0.0150661	0.123785	-0.90036	-0.274839	-0.660613	-0.453532	0.239696	-0.0212479	0.0988092	0.193028	0.304055	0.0507679	-0.0331488	0.327247	0.249042	-0.377213	0.110683	0.151575	9.54e-07	-9.54e-07	0.0202837	-0.05091	0.0769701	-0.0530348	0.299777	-0.780127	-0.328345	-0.147098	-0.472245	-0.283217	0.61041	-0.867402	-0.0630655	0.252953	0.67465	0.595199	0.532199	0.153193	-1.36532	0.542426	-0.607001	0.15276	-0.137595	0
200946_x_at	GLUD1	0.122063	0.0450859	-1.59235	-0.985315	0.360218	0.295289	0.709431	0.528062	-0.667108	0.426325	-0.302285	-0.241791	0.216617	0.00215721	-0.00215721	0.00293159	-0.215986	-0.427489	-0.461738	-0.27174	-0.00391674	0.281189	0.393397	-0.984493	-0.0947332	-1.93744	-2.33712	0.31965	0.328846	-1.67766	-0.603663	-0.328918	-0.288192	-0.635058	0.572557	-1.2548	0.176242	0.447056	0.510215	0.712893	0.0947332	-1.88579	0.426874	0.82249	0.421605	-0.352159	-0.24275	0.243302
200947_s_at	GLUD1	-0.034565	0.225765	-1.18567	-0.829233	0.739498	1.40639	1.44504	0.899381	0.388775	0.115845	-0.20994	-0.33216	-0.0345669	-0.347848	-0.195988	-0.28755	0.921603	0.034565	-0.25118	-0.378691	0.403918	0.576585	0.782181	-1.73378	-0.126241	-2.3121	-2.1489	0.062973	0.096817	-1.14438	0.868047	1.13645	-0.261705	-1.32665	-0.802278	-2.07461	0.2874	0.0171576	-0.0171576	0.334142	0.456522	-1.70972	0.262114	0.736073	0	-0.393171	-0.444226	-0.183167
200948_at	MLF2	0.670975	-0.0491896	-1.41378	-0.562388	1.00627	1.64515	0.0159159	-0.0159159	-0.267873	0.516855	0.884337	-0.232069	-0.15478	-0.371228	-0.0962286	-0.499591	-1.86054	0.256182	0.17959	0.863111	0.87172	0.745223	0.387448	-0.0510397	0.427088	-0.958334	-0.700102	-0.0677052	-0.146746	-0.845022	-0.307934	-1.27565	0.0582132	-1.21996	0.534243	-0.653032	0.0634527	-0.0287647	0.402861	0.104616	0.186955	0.0936232	0.0287647	0.102891	0.218234	0.537189	-0.589413	-0.801604
200950_at	ARPC1A	-1.10838	-1.31679	-1.54019	-0.506135	0.443582	1.56396	1.8359	2.05474	0.953777	-0.431221	-0.365372	-0.00728846	-0.733607	0.00728893	-0.228497	-0.194635	-0.0800543	0.721972	1.08599	1.04719	0.969688	0.907136	0.925474	-1.2341	0.721536	-0.178458	0.236501	1.60721	1.49154	0.760779	-0.165197	1.16479	0.440643	-1.21973	-1.01706	-1.60172	0.0120144	-0.762484	-0.394696	-0.0828857	-0.0120144	0.151764	-1.92797	1.03249	-0.238299	-0.229047	0.0802002	-0.594846
200951_s_at	CCND2	0.22692	-0.469894	1.21276	2.23244	-0.323678	-0.321123	0.436549	-0.415781	0.162728	-0.275486	0.629446	0.0563397	0.576035	-0.0563397	0.41018	-0.454114	-0.54014	0.500233	1.72263	-0.166168	-0.647352	-0.417079	-0.512626	0.778021	-0.257773	2.46857	1.62997	1.1207	0.304251	1.43789	0.429998	0.326373	-0.240881	-0.0170321	-0.480046	0.0383005	-0.112717	-0.184949	0.0170321	-0.611018	-0.157602	-0.113728	0.028131	-0.35119	0.112598	0.92467	0.524267	1.06381
200952_s_at	CCND2	-0.298882	0.607894	0.251267	0.309879	-0.262939	0.0294466	-0.0192852	-0.106072	0.0194669	0.0149937	-0.173915	-0.0595708	0.138983	0.0162106	-0.161078	-0.0154858	0.305802	-0.0323043	0.0220451	0.0310669	-0.0598459	-0.0149937	-0.218771	0.0800109	-0.094295	-0.054183	-0.503649	-0.222164	-0.318167	0.0251222	0.031846	-0.157359	0.0434141	0.324611	0.08252	0.672975	-0.154839	-0.131677	0.091116	0.0346298	-0.00950146	0.00950146	0.623858	-0.363381	-0.161716	-0.243559	-0.197834	0.187851
200953_s_at	CCND2	-0.135545	0.0177894	1.32363	1.51501	-0.972262	0.28707	0.556967	-0.280182	-0.368916	-1.07647	0.86408	-0.0116158	0.672043	0.0566683	0.0289302	-0.982696	1.18309	-0.894309	-0.109729	-1.19118	-0.149323	0.0116158	-0.0330181	1.29268	0.544087	1.53586	2.05465	1.19313	-0.104589	0.988199	1.95553	2.11088	-0.541333	0.211998	-1.27447	-1.58039	-1.28353	-1.09184	-0.838859	-0.993183	-0.837556	0.0330181	0.262617	-0.911971	-0.468799	1.27372	0.803685	1.08889
200954_at	ATP6V0C	0.527954	0.44987	-0.551522	-0.587299	0.419307	0.637785	0.542536	-0.142978	0.434436	0.237269	0.075017	-0.0960093	0.0563498	-0.0637636	-0.198277	-0.283085	-0.763632	0.08951	-0.299616	-0.0563498	0.189212	-0.0914898	-0.0660868	0.205456	0.169271	-0.465115	-0.909125	0.128082	0.480506	-0.0827389	-0.416352	-1.14165	-0.78661	0.0222483	-0.145361	0.11651	0.221776	-0.177748	0.147217	-0.0462532	0.267785	-0.0222483	0.60238	0.164289	0.11953	-0.0979328	-0.225897	-0.133521
200955_at	IMMT	-0.09126	-0.564524	-0.84156	-0.531601	0.455091	0.101381	0.414458	-0.205389	-0.172163	-0.00471401	0.101027	-0.133474	-0.00382805	-0.00483704	0.117847	-0.140842	0.110344	0.321358	0.207382	0.25848	0.050787	0.00382805	0.485751	-0.198191	0.340501	-0.352612	-0.50074	0.171169	0.0700893	-0.329385	-0.0956802	-0.0530539	-0.0324659	-0.544936	0.336374	-1.25526	0.0324659	0.209608	0.356015	0.483612	0.231042	-0.369154	-0.16258	0.693331	-0.0196981	0.00386524	-0.239453	-0.0659313
200956_s_at	SSRP1	-0.0612254	-0.764991	0.417123	1.05284	0.00909281	-0.485959	1.48086	1.15651	-0.00909233	0.552768	0.470216	0.932909	0.472983	-0.0178442	-0.113585	-0.718547	-0.613704	0.207849	-0.227275	0.250821	-0.143643	-0.219749	0.266618	0.025207	-0.377084	0.925474	0.705587	1.00209	0.666214	-0.0252066	-0.272796	-0.148428	0.695794	0.114665	-0.444134	-0.0576944	0.0527992	-0.79171	0.0817661	-0.1429	-0.0647583	-0.113477	-0.0684562	0.0369482	0.511778	0.424541	0.940859	0.46251
200957_s_at	SSRP1	0.0702982	-0.391655	-0.0150933	0.529417	-0.0935354	-0.385197	-0.269377	0.210911	0.103592	-0.0054698	0.0292702	0.0054698	-0.149311	-0.123577	-0.132622	-0.500814	0.884844	0.0537434	-0.0700879	0.775608	0.368385	0.1551	0.374415	-0.175823	0.20286	0.25692	0.100872	0.0432253	0.0450621	0.1638	0.00917053	-0.0793457	0.289043	0.295247	-0.269965	-0.477898	-0.0507879	-0.542925	-0.0871887	-0.203071	-0.50439	-0.294603	0.17074	-0.00917053	0.177476	0.156119	0.0743036	-0.0468197
200958_s_at	SDCBP	-0.148785	0.262236	0.142483	-0.0937548	-0.0488701	-0.236914	0.582305	0.404426	-0.590723	-0.352154	-0.292593	-0.116429	-0.219055	0.231615	0.38801	0.0645771	0.478001	-0.461866	0.101556	-0.306775	0.0488701	0.17342	0.343786	-0.0752192	0.878118	-0.697363	0.636778	0.478689	0.0752192	-1.20813	0.377102	1.37458	-0.176232	-0.693058	-0.863608	-2.10023	-0.185211	0.0925827	-0.177008	0.0870523	0.393661	0.106862	-2.96415	-0.567018	-0.360753	-0.338315	-0.0669909	-0.238704
200959_at	FUS	0.440798	-2.6739	-1.05793	0.390486	0.500049	-0.535199	-0.87326	-0.330598	0.873657	0.452178	-0.37062	0.136851	-0.963655	-0.443902	-0.645474	-0.266172	1.69587	-0.0933685	0.0933685	0.643934	0.341403	0.156552	-0.180807	1.03711	0.0632124	0.147996	0.855579	-0.314457	-0.0292444	1.44506	0.0292444	0.834194	1.32105	-0.311273	-0.325461	-0.49818	-0.191211	0.114414	0.104009	-0.612858	-0.166671	-0.881242	-0.846483	0.780169	0.720159	-0.0725737	0.544981	-0.48541
200960_x_at	CLTA	-0.00919914	-0.747808	-1.40486	-1.02153	0.442851	0.672563	0.449704	0.352264	0.368868	0.00919914	-0.0420961	-0.454691	-0.58798	-0.634899	-0.573993	-0.297025	-0.394062	0.117119	0.0979672	0.584213	0.17942	0.27282	0.258522	0.44116	-0.0573769	-0.448496	0.0312023	0.336896	0.537581	0.0901508	0.192404	-0.703466	-0.0312023	-0.352579	0.281338	-1.51931	-0.412477	-0.371117	-0.294476	-0.43397	-0.363084	0.227423	0.308159	1.01964	0.342966	0.0490789	-0.261533	-0.425183
200961_at	SEPHS2	0.289808	-0.341218	-1.09949	-0.622136	0.516879	0.310555	0.439139	0.315868	-0.440356	-0.122922	-0.197873	-0.135064	-0.0310888	-0.014679	0.00112629	-0.00112629	0.0919895	0.0950623	-0.470063	0.187772	0.0229292	0.337675	0.141555	-0.306336	0.197676	-1.14902	-1.33633	0.161379	0.241992	-1.46124	0.0218763	-0.0218754	0.376352	-0.378374	-0.0636139	-1.42618	0.334168	0.376686	0.0785618	0.483309	0.435258	-0.461994	-0.951603	-0.0515356	-0.154503	-0.266064	-0.251278	-0.12957
200962_at	RPL31	-0.0251732	-0.397366	0.114198	0.849706	-0.096962	-1.11566	-0.473989	0.294984	-2.0758	-0.0509758	-0.341948	0.227411	0.225226	-0.196468	0.458324	0.614726	0.317042	-0.231129	0.0251732	0.0493088	0.0553942	-1.37885	0.909485	0.492145	1.22457	-0.0911865	-0.365418	-0.84201	-0.1088	-2.4124	1.33601	0.594654	0.496573	-0.792387	-0.0370979	-1.03332	0.415201	0.614952	0.0370979	0.0449314	0.363414	-0.190159	-1.88035	-0.0510817	-0.216159	-0.45064	0.0833101	0.0345888
200963_x_at	RPL31	0.225995	0.345615	0.13844	0.187117	0.216137	-0.617213	-0.835563	-0.500541	0.300231	-0.160568	0.065979	-0.212064	-0.16809	-0.245832	-0.183657	-0.0501223	-0.574448	0.375163	0.0501223	0.510873	-0.0927534	0.097352	-0.438478	0.509028	-0.0175781	0.841908	0.0588865	-0.7747	-0.553399	0.00687504	-0.498679	-0.247827	0.527123	0.143349	0.689958	-1.91054	-0.245879	0.0529327	-0.00687409	-0.018961	-0.0896902	0.391062	0.0199852	0.46972	-0.005723	0.228471	-0.0797596	0
200964_at	UBA1	0.304975	-2.37529	-1.74772	-1.48229	0.13419	0.483646	0.465092	0.968741	0.322072	0.266958	-0.13419	-0.276202	-0.430649	-0.982052	-0.42625	-1.57588	-0.44096	0.981607	1.58676	0.924152	0.24859	-0.145235	0.490675	0.611597	0.465943	0.373688	0.818384	1.43714	1.15527	-0.0206518	-0.949508	-1.55979	0.731611	-0.216063	0.365142	-0.549779	-0.340541	-0.517666	-0.0529218	-0.466889	-0.373651	-0.423758	0.866881	0.0206518	0.632048	0.523695	0.308376	-0.0690484
200965_s_at	ABLIM1	1.00145	-0.398658	-0.478702	0.145155	-0.233057	1.62514	2.04235	1.731	-1.04233	0.319646	0.524494	-0.323975	-0.0670576	-0.353225	0.20946	-0.0487661	0.656776	0.0487661	-1.09195	-0.731936	0.116199	-0.150766	0.43724	0.0722189	0.965867	-1.39583	0.10638	1.01247	0.849733	-1.03212	0.376068	0.850893	-0.576566	-0.269022	-0.651591	-1.78586	-0.281739	-0.0722189	0.210836	0.264557	0.662831	-0.373813	-1.58885	-0.239251	0	0.259261	-0.666592	-0.425673
200966_x_at	ALDOA	0.294065	-1.01256	-1.3298	-0.177745	0.306438	1.22681	0.0655022	-0.0655022	0.580908	0.217009	0.350897	-0.451147	-0.576773	-0.675435	-0.620684	-0.674398	-2.1716	0.173187	-0.169467	0.491447	0.252102	0.085556	0.340795	0.243556	0.602655	0.0940943	0.0256414	-0.129265	-0.0867052	0.152333	-0.78411	-1.04013	-0.0256414	-0.414853	0.0376024	-1.23182	-0.112435	-0.519742	0.0294313	-0.423091	-0.0697908	0.106801	0.311056	1.08447	0.393288	0.643713	-0.114627	-0.303146
200967_at	PPIB	0.362555	-1.12134	-0.380973	0.117253	-0.00330257	2.03322	1.16288	0.813981	0.916901	0.0300484	0.64845	-0.430274	-0.651199	-0.553245	-0.578038	-1.05844	0.0575037	-0.394635	0.00330257	-0.462786	0.129816	-0.0461178	0.115386	0.206837	0.178608	0.647115	0.0230455	0.377799	0.395046	0.10654	-0.0230455	0.481832	-0.784052	-0.849153	-0.506613	-2.02318	-0.889008	-1.39381	-1.01194	-1.31294	-0.596003	-0.808918	0.603858	0.729012	0.234271	0.818662	-0.238818	-0.461177
200968_s_at	PPIB	0.409377	-1.82983	-0.78236	0.48434	0.10726	2.62608	1.15294	1.0779	1.16061	0.330383	1.0048	-0.440182	-0.86737	-0.751259	-0.609193	-1.34765	-0.10726	-0.70042	-0.143939	-0.661409	0.30064	0.350296	0.377631	0.257058	0.672399	0.993078	0.0296307	0.279707	0.29678	0.312032	0.00765324	0.993036	-0.00765324	-1.42579	-0.661919	-2.87346	-0.577932	-1.54587	-1.15733	-1.16729	-0.384016	-1.49504	-0.236594	1.17424	0.600177	1.35427	-0.20787	-0.537846
200970_s_at	SERP1	-0.212791	0.554335	-0.408219	-1.19306	-0.36479	0.013752	0.368973	0.57876	-0.672573	-0.458618	-0.039999	-0.127989	0.0390072	0.0205641	0.165095	-0.013752	0.140442	-0.0148716	0.482842	0.344423	-0.355555	0.309994	-0.0497437	-0.466462	-0.176031	-0.780494	1.25964	0.666532	0.585779	-0.721982	0.125837	0.791829	-0.065011	-0.140677	-0.0472174	-1.2645	-0.415771	0.571295	0.216332	0.0472174	0.729448	0.794657	-1.21296	0.1579	-0.499068	-0.0983095	-0.00860023	0.0855455
200972_at	TSPAN3	-0.0215244	-0.562721	-0.659325	-0.673067	-0.0569019	0.20573	1.13787	1.06256	-0.367582	0.0909462	-0.0123787	0.150297	0.165003	0.0472374	-0.503993	0.0213432	0.439294	-0.30349	0.0151663	-0.215247	0.0123787	-0.0365925	0.58444	-0.0626221	0.851853	-0.721265	-0.0856524	1.37806	1.33405	-0.774283	0.388017	0.412833	0.142974	-0.340354	-0.204308	-1.64377	-0.0304365	0.226707	0.0304365	0.180471	0.288854	-0.2083	-0.265692	-0.150736	0.194579	0.0840168	0.274969	0.270831
200973_s_at	TSPAN3	-0.0139446	-1.62863	-0.932596	-0.701376	0.132347	0.197681	1.41224	1.28672	-0.123694	0.0794773	-0.107642	-0.155518	0.00598621	-0.201006	-0.288326	-0.0439625	-0.00598621	0.0233078	0.400123	0.0998039	0.297557	0.0571899	1.23747	0.227147	0.973772	-0.406448	-0.165803	1.49669	1.43452	-0.106489	0.341829	0.794064	-0.354363	-1.24628	-0.0668001	-1.86998	-0.0162287	0.0162287	-0.021512	0.286192	0.144983	-0.588316	-0.706826	0.567493	0.268945	0	-0.0822439	0.193399
200974_at	ACTA2	1.07962	-1.16251	0.338301	0.523466	0.442014	0.513637	0.32496	0.142079	1.46934	0.388688	0.67683	-0.142079	-1.96702	-0.293734	0.184224	-0.949801	-1.10111	-0.930139	-0.143624	-0.580741	-0.354608	-0.927016	0.268568	0.170538	0.82711	2.29185	1.62612	0.192713	-0.891965	1.8106	-1.87744	0.178172	2.17516	-0.36626	-1.8755	-1.25516	-1.14366	-0.098835	0.098835	-1.25126	-1.38761	0.551249	-0.935015	-0.229547	0.853568	1.33329	0.293283	-1.59576
200975_at	PPT1	-0.268925	-0.0592108	-0.317909	0.174162	-0.508097	-0.209038	0.272465	0.16236	0.25836	-0.297507	0.287111	-0.0280428	0.0280428	-0.175512	-0.321305	0.389636	-0.151665	-0.0568428	0.409033	0.0374145	0.391528	0.144401	0.517547	-0.200091	0.235019	0.787615	0.657532	0.555513	0.321324	0.343111	-0.202023	0.550237	-0.518842	-0.386653	-0.133764	-1.55512	-0.14613	-0.212335	-0.542904	0.0194559	-0.0194559	0.369053	-1.4645	0.893242	-0.0400667	0.62252	0.128488	0.221078
200976_s_at	TAX1BP1	0.318323	-1.1563	-0.689827	-0.281728	-0.228505	-0.184612	0.138763	0.0142546	-0.730688	0.239643	-0.0735874	-0.0993071	-0.119525	0.0800085	-0.0101433	0.149077	-0.00726509	0.00726509	0.0923195	0.170136	0.271111	0.192567	-0.0338268	0.38376	0.388654	-0.102496	0.0338268	0.354622	0.117834	-0.707121	-0.431346	-0.047884	-0.0446033	0.0699816	0.580413	-1.31554	0.296542	0.679509	0.115238	0.178156	-0.0687704	-0.64717	-0.180772	-0.153614	0.262625	-0.077611	-0.0469885	-0.0946312
200977_s_at	TAX1BP1	-0.130054	0.645666	0.256808	-0.227762	-0.216125	-0.480917	-0.774917	-0.669237	-0.317285	-0.0191574	-0.138571	0.058567	0.182373	0.0191574	-0.118959	0.154251	0.435562	0.193817	0.0210552	0.179092	-0.204559	0.256964	-0.460431	0.0980577	-0.237053	-0.0374594	-0.0687094	-0.446139	-0.484036	-0.759358	0.331939	0.614736	0.244565	0.270154	0.196185	-1.18807	0.0071888	0.215756	0.0360422	0.135081	-0.21775	-0.485913	0.641379	-0.0071888	0.0279484	-0.126274	0.114352	0.203109
200978_at	MDH1	0.694351	-1.54175	-1.88747	-0.580141	0.767029	0.903028	1.15332	1.02482	-0.434581	-0.0275116	0.162491	-0.602597	-0.29487	-0.611878	-0.42683	-0.449714	-0.0077467	0.212276	0.00774765	0.137347	0.254787	0.112018	0.284744	0.147564	0.989881	-1.03088	-0.735476	1.09478	1.03562	-1.3559	-0.855196	-0.102535	-0.0993347	-0.954806	0.757196	-2.35738	0.352509	0.439187	0.330473	0.416291	0.0465565	-0.628922	-1.41127	-0.0465565	0	0.13697	-0.685221	-0.17745
200979_at	PDHA1	0.319355	-0.543775	-0.676166	-0.421931	0.0972319	0.549445	0.412613	0.79935	0.16816	-0.118427	0.693464	-0.535301	-0.518177	-0.552637	0.0130444	-0.23641	0.0144148	-0.0182304	-0.608203	-0.0130444	0.226566	0.113516	0.828383	-0.132414	0.593337	-0.892324	-1.31823	0.511752	0.591485	-0.0581293	0.193711	0.332898	-0.484882	-0.608867	0.129107	-1.32476	-0.258463	0.0581293	-0.171856	-0.101476	0.507668	0.900758	-0.256463	0.49875	-0.169287	0.671921	-0.533952	-0.659466
200980_s_at	PDHA1	0.11669	-0.96381	-0.512028	-0.452204	0.611256	0.769815	1.34732	1.0279	0.53885	-0.161141	0.00527382	-0.227007	-0.245845	-0.421197	-0.562073	-0.694288	0.309921	0.317853	-0.208933	0.20517	-0.00527382	0.214715	0.818639	-0.000597	0.683471	-0.686087	-0.859208	1.08644	0.702258	0.0966902	-0.695708	0.12554	0.000597	-0.411728	-0.165172	-1.33223	0.137161	-0.293526	0.117414	-0.0268545	-0.166254	-0.231772	0.52667	0.762136	-0.346291	-0.192449	-0.448426	-0.371345
200981_x_at	GNAS	-0.306036	-2.28795	-1.46143	-0.11194	-0.527134	0.0414515	-0.225457	-0.259318	-0.267888	-0.133637	0.388223	0.139403	0.0103035	0.428364	0.620884	0.372314	-0.884617	0.0910721	0.495542	-0.000925	0.147785	0.000924	-0.12557	0.57681	0.491193	0.574728	0.937326	0.397982	0.0443859	-1.00469	-1.30281	-1.2311	-0.059907	-1.88138	-0.22553	-2.42225	-0.37127	-0.0443859	0.369939	0.432926	0.420544	0.58768	-1.45227	0.0737038	-0.0373344	0.437475	0.224871	0.0624046
200982_s_at	ANXA6	0.798041	-0.274244	-0.0312719	0.222524	0.487256	0.897839	-1.05435	-0.613326	1.04907	0.280396	0.192839	-0.802594	-0.417749	0.0229664	-0.317493	-0.320449	0.635395	0.148165	-0.341718	-0.0229669	0.299195	-0.378258	0.226035	0.46881	0.475607	0.348692	0.606201	-0.364791	-0.337373	0.580893	-1.05155	-1.47005	-0.373317	-0.159836	0.397307	0.587176	-0.164564	0	0	-0.149878	0.0388732	-0.0888066	-0.284888	0.814402	0.103528	0.0973463	-0.872137	-0.505803
200983_x_at	CD59	0.97615	-0.484558	-0.112855	-0.46307	0.623467	0.241457	-0.0434532	-0.191021	0.47303	0.134811	0.609506	-0.230117	-0.129832	-0.436898	-0.276575	-0.318594	-0.17253	0.7986	0.594999	0.403945	0.105415	0.0434532	0.101868	0.641955	0.165048	0.468852	-0.260419	-0.290888	-0.0147142	0.226284	0.0480013	0.41315	-0.309371	-0.277118	0.432054	-0.300238	-0.368619	-0.200835	-0.584694	-0.678974	-0.220281	0.0147142	0.298696	0.943728	0.34923	0.788852	-0.215062	-0.062748
200984_s_at	CD59	-0.01196	-0.246277	-0.327495	-0.130127	-0.18645	0.854504	1.1658	1.00681	0.01196	0.111237	0.261821	0.0657072	-0.483373	-0.178868	-0.0828114	-0.371253	0.895119	0.276215	0.405153	0.0764275	-0.0428038	-0.255195	0.201555	0.124432	0.401496	0.162132	-0.000272	0.701098	0.638359	-0.106337	0.000272	0.166635	-0.869257	0.119524	-0.538803	-1.39718	-0.624771	-0.608288	-0.789781	-0.856298	-0.299765	0.647177	-0.060051	0.0791473	0.163492	0.347144	0.145947	-0.349586
200985_s_at	CD59	-0.514583	-0.260159	-0.581793	-0.52261	-0.553788	0.311733	0.627005	0.435412	-0.282701	-0.00206852	0.0763807	0.111957	-0.0665617	0.175385	-0.0671663	0.176354	0.711143	0.144517	0.470196	0.00206852	-0.128585	-0.16293	0.162647	-0.185887	0.590484	-0.0618782	0.448284	1.02947	0.721716	-0.382651	0.0706482	0.917519	-0.156445	-0.496485	-0.761135	-1.93363	-0.429233	0.0295105	-0.315365	-0.0295105	0.46682	0.991061	-1.21622	0.403556	0.088335	0.125628	0.223991	0
200986_at	SERPING1	1.14359	-2.36976	0.342164	-0.138844	-0.0571852	-1.04019	-0.0314035	-0.511321	0.0314035	-0.106189	0.48249	-0.73191	-0.144771	0.440482	0.192508	0.305236	-1.20697	0.101003	0.810119	0.0401087	-0.085433	0.0775137	-0.125823	1.48444	1.59656	2.50053	1.89364	1.12059	0.443294	1.06841	-0.279579	0.868592	-0.125238	-0.185136	-1.17435	-0.826241	-0.686607	0.246329	-0.391936	0.263971	-0.379618	-0.317369	-0.426411	0.125238	0.661716	1.28628	-0.0783854	0.47819
200987_x_at	PSME3	0.0943365	0.0249815	-0.0910473	0.110354	0.26584	0.296213	0.0788946	0.0936332	-0.405972	-0.1129	-0.0999856	0.0625849	-0.177669	-0.193034	-0.0249815	-0.100307	0.536183	-0.0754986	0.228301	-0.0375233	-0.0332508	0.370788	0.124093	0.667137	0.568524	0.661254	-0.464075	0.191482	0.103784	-0.0312028	-0.352851	-0.187777	-0.0680261	-0.382935	-0.138359	-0.0706911	-0.0938764	0.0312028	0.336862	0.176365	-0.183996	-0.231133	0.0440464	0.202538	0	-0.0141802	0.207159	-0.110741
200988_s_at	PSME3	-0.121399	-0.818062	-0.824109	-0.374693	-0.358569	0.651362	0.808414	0.28421	-0.526445	-0.00674677	0.136637	-0.0463381	-0.182623	0.0533633	0.0469971	0.00674677	0.0992503	0.0802507	0.320673	-0.288505	0.131264	-0.123525	0.290858	-0.00159407	0.649209	-0.534197	-0.314129	0.83727	0.525432	-0.675453	0.176659	0.298248	-0.676561	-0.311391	-0.388026	-0.243476	0.0907779	0.429563	0.00159454	0.271975	0.417091	-0.11096	-0.271221	-0.655032	-0.112987	0.0443726	-0.244437	-0.364626
200989_at	HIF1A	0.477264	0.4237	0.921188	-0.089179	0.0404034	0.0903902	0.432304	0.312113	-0.754992	-0.118313	0.0658197	0.044486	-0.0733967	-0.313769	0.222903	-0.0404043	0.224978	-0.154274	-0.439539	-0.829443	-0.330714	-0.460929	0.336805	0.186795	0.127762	-0.0575352	0.669769	0.608341	0.0516319	-0.901451	-0.021307	0.595807	-0.785157	0.021306	-0.641621	-1.97727	-0.296643	0.0447989	-0.313896	-0.421955	0.172901	0.602534	-1.33159	-0.768744	0	0.167933	0.143183	0.00675869
200990_at	TRIM28	0.573749	-1.25707	-1.08957	-0.0738797	0.48611	0.28211	0.85797	0.966414	0.211542	0.0291524	0.159546	-0.186628	-0.0964251	-0.0331969	-0.0918708	-0.383545	-1.35902	0.840172	0.941108	0.670423	-0.04849	-0.0291519	0.140193	0.232198	-0.000353	0.103498	1.3612	1.25363	0.867175	0.558343	-0.994874	-0.99211	-1.01807	-0.283137	0.179215	-0.0995526	-0.779354	-0.276619	-0.146294	0.0190177	0.000354	-0.0566192	0.0872831	-0.222839	0.338356	0.546023	-0.0659776	-0.0271769
200991_s_at	SNX17	-0.140737	-0.49572	-0.867898	0.232866	-0.239463	1.07123	0.505632	0.724691	0.214634	-0.0601521	0.0601521	-0.226398	-0.383059	-0.293813	-0.38921	-0.498199	-0.882937	0.412708	0.290488	0.570699	0.342783	0.189228	0.538073	-0.162913	0.650212	-0.000474	0.431989	0.426353	0.72814	0.393596	0.000474	-0.117117	0.222394	-0.258545	0.0145378	-1.22903	0.0866747	-0.675401	-0.251372	-0.0798111	-0.107289	-0.133293	-0.640167	0.650865	0.0743694	0.14045	-0.0587473	-0.244791
200992_at	IPO7	0.0889168	-0.925243	0.429878	-0.205088	-0.115578	-0.497314	0.0636206	0.0576544	-0.325494	0.0123072	-0.0425596	-0.401639	-0.0123072	0.13748	0.114726	0.333914	0.665306	-0.216466	-0.522792	-0.504283	0.018816	0.0607214	0.279688	-0.168631	0.39798	-0.281599	0.078248	0.101186	-0.134436	-0.856244	0.41243	0.623163	-0.317214	-0.239402	-0.364702	-1.25426	-0.172583	0.232254	0.0412998	0.168727	0.237417	-0.851748	0.524136	-0.0412998	-0.132909	-0.112294	-0.570867	-0.194307
200993_at	IPO7	0.357078	-1.92212	-0.64879	-1.07869	0.255843	0.31184	1.85541	1.60515	0.895232	-0.109298	-0.496913	-0.44066	-0.202645	-0.287013	0.136676	-0.0933943	0.812578	-0.18313	0.0171871	0.237265	0.356519	-0.0171871	0.462896	-0.719284	0.277288	-1.06777	0.0694094	1.44082	0.95305	0.0732222	0.0391378	0.787742	-0.980076	-2.07811	-1.15439	-2.04262	-0.511522	0.244016	-0.0391378	-0.162766	0.202353	-0.799458	-1.14037	0.71426	0	-0.331448	-0.312678	-0.0769539
200994_at	IPO7	0.0763702	-0.657277	0.211539	-0.42326	-0.148213	0.012188	0.698296	0.402897	0.0480337	0.0643883	0.0498238	-0.189741	-0.0428686	-0.159681	-0.0943756	0.226254	0.447911	-0.545665	-0.663463	-0.300867	-0.012188	0.281548	0.373239	-0.339982	0.281706	-0.863117	-0.0643187	0.536522	0.222072	-0.516185	0.932707	0.718857	-0.830505	-0.289031	-0.241658	-0.630733	-0.241081	0.269871	-0.0291204	0.252918	0.260565	-0.600225	0.0291204	0.53346	0	0.020751	-0.189557	-0.116974
200995_at	IPO7	-0.0708208	0.152624	0.223999	-0.777138	-0.0949802	-0.245314	0.153221	0.131315	-0.657262	-0.100548	-0.0471764	0.367919	0.105636	0.101322	0.331483	0.36996	0.432146	-0.118024	0.0471764	-0.74773	-0.198156	-0.208013	0.0053215	-0.298745	-0.164767	-0.976131	0.187273	0.255243	-0.0053215	-1.34965	0.503944	0.317043	-0.630646	-0.276421	0.181191	-1.04778	-0.347557	0.680492	0.183988	0.428031	0.500954	-0.80549	0.106219	-0.491685	-0.150196	-0.179005	0.229164	0.077157
200996_at	ACTR3	0.600507	-1.1348	0.193909	0.631199	-0.206653	0.0553722	0.995264	0.793212	-0.411844	-0.266312	-0.0178566	-0.0323906	-0.193996	-0.203981	0.155002	0.114723	0.872076	-0.0978375	-0.00920773	-0.133404	0.164268	0.00920773	0.31669	0.347353	1.12721	-0.0168991	1.0187	0.722876	0.432911	-0.691235	0.928796	1.76246	0.00881958	-0.349221	-0.665036	-2.35977	-0.0623741	-0.00881958	-0.214367	-0.103783	0.25958	0.0524311	-2.50523	-0.418241	-0.254564	-0.0153666	0	-0.183605
200998_s_at	CKAP4	0.202932	-1.38712	0.356642	-0.437113	-1.23293	-1.41032	0.664749	0.202018	0.17932	0.539162	0.116471	0.375653	-0.311852	-0.575201	0.00740623	-1.09527	-0.430825	-0.168169	0.147603	-0.794309	-0.00740623	0.0157948	-1.26933	0.138182	-0.0629139	1.08824	0.866737	1.04403	0.76337	0.563623	0.0629139	0.242723	-1.16358	0.16386	-0.436117	-0.951107	-0.951671	-0.375566	-0.122091	-0.962509	-0.248765	0.146858	0.644676	-0.306682	1.08277	0.621231	0.887468	0.133242
200999_s_at	CKAP4	-0.28569	-0.605305	0.557925	-0.322123	-1.16051	-0.807601	-1.01198	-1.1885	-1.13941	0.048007	0.149038	0.381235	0.19867	0.37987	-0.0337458	0.284359	0.491849	-0.367367	0.0337458	-0.381936	0.175199	0.131057	-0.769459	1.00164	1.03875	1.53508	1.87461	0.134977	-0.229761	-0.171114	0.262753	0.72607	-0.446543	0.780162	-0.250358	-0.527474	-0.169647	0.363597	-0.205777	-0.134977	-0.312326	0.351575	0.487817	-0.483372	0.412992	0.524659	0.705742	0.519719
201000_at	AARS	-0.00125313	-1.02832	-0.421449	0.00275993	0.171221	0.782907	0.606895	0.37479	0.0718746	0.00125313	-0.105568	-0.17136	-0.141491	-0.0628681	0.212614	-0.605892	-1.28381	0.0561619	0.220543	-0.147229	0.191835	-0.0126619	0.0548725	-0.384286	0.233545	0.115942	0.414819	0.172624	0.392257	-0.235623	-0.298381	-0.600018	0.179999	-0.855457	-0.122554	-1.11456	-0.012476	-0.678788	0.012476	0.189557	0.120046	-0.804842	-0.122162	0.273736	-0.0478163	-0.148154	-0.197066	-0.125319
201004_at	SSR4	0.228112	-0.109685	1.49469	0.801601	0.903996	-0.320497	-1.3656	-0.883632	0.975449	-0.136999	0.151986	-0.0347786	-0.381801	-0.369085	-0.517108	-0.529876	-2.22782	0.252242	1.0173	0.610846	0.0347786	0.0701323	0.174177	0.481137	0.00404453	2.64765	1.00063	-1.22788	-0.705323	0.659053	-0.253078	0.349233	0.334596	-0.0316973	0.347824	-1.05457	-0.00404453	-0.170425	-0.277575	-0.401934	-0.177115	0.158165	-0.771176	0.839183	0.0406027	0.467911	0.11117	-0.108241
201005_at	CD9	-0.729365	-2.05218	0.0834274	0.20121	-1.51324	0.442595	0.989447	0.388876	1.14479	-0.248664	-0.0277815	0.0277815	-0.510018	-0.195053	-0.32506	-0.454183	-0.435481	-0.346899	0.592463	0.115278	0.27877	0.280194	0.730269	-0.522155	1.0281	0.267314	-0.00866032	0.733418	0.148785	1.20498	0.982888	2.96219	-0.139634	-0.693232	-1.69007	-2.20741	-0.113421	-0.578803	-0.397346	-0.164396	0.00866032	0.247362	-2.0821	1.20141	-0.0329494	0.175884	0.221357	-0.335814
201006_at	PRDX2	0.209108	0.00830126	-0.00927782	0.0980458	0.378489	-0.0260706	-0.667833	-0.458569	0.103852	0.100157	0.0072031	-0.401777	0.00998497	-0.0736361	-0.0687771	0.113492	-0.157181	0.42525	-0.0924396	0.098382	-0.108605	-0.0072031	0.0673976	-0.0494471	0.189987	-0.00989342	-0.221461	-0.317352	-0.203989	-0.146284	-0.0635881	-0.576278	0.536186	0.595013	0.507081	-0.16152	0.00989342	0.229358	0.178716	-0.0289121	-0.144562	0.327147	0.543252	0.218339	0.120419	-0.0543242	-0.400405	0.0672288
201007_at	HADHB	-0.0311508	-0.601047	-0.488064	-0.377534	1.17766	0.921735	0.831005	0.678862	0.239182	-0.192702	-0.0993881	0.0094347	-0.00943565	-0.233854	-0.132252	-0.0538311	0.681269	0.217865	-0.312886	0.278893	0.104124	0.0827436	0.433967	-0.0697088	0.249689	-0.866728	-0.239023	0.445109	0.607649	-1.10254	-0.172119	0.166733	0.0807409	-0.0736094	-0.015131	-1.53823	-0.0472679	0.356275	0.196547	0.202298	0.015131	-0.0810528	-0.111422	0.262236	-0.47549	-0.312509	-0.365208	-0.291973
201008_s_at	TXNIP	0.665135	-2.30489	0.0417776	-0.000331	-0.536668	-1.45016	0.769264	0.405643	-0.703712	1.09013	0.095521	0.401929	-0.231044	0.000331	-1.00952	-0.635083	0.281116	-0.150037	0.364527	-0.283381	0.0794992	-0.171489	0.033535	1.07773	-0.109154	1.05777	1.19868	1.37916	-0.0403757	0.295444	-0.033535	0.416264	0.107602	-0.0464134	-0.823019	-0.177686	-0.294023	-0.100189	0.353495	-0.491411	-0.858115	0.686859	-0.277484	0.0997028	1.398	0.432138	0.798974	0.0488586
201009_s_at	TXNIP	0.169829	-1.52942	-0.225691	0.0330334	-0.0330334	0.289808	3.08884	2.05557	1.18221	0.756061	-0.0633116	-0.0606937	-0.692367	-0.0487308	-1.59262	-0.8145	-0.325035	-0.167375	0.147818	0.272553	0.676601	0.602343	1.32375	-0.0316105	-0.42184	0.0316105	1.49568	2.8099	1.51654	1.45072	0.745388	1.52055	-0.675573	-1.34765	-1.49788	-0.754828	-0.345799	-1.38284	-0.919208	-1.02515	-1.67101	1.41916	0.174271	1.03298	1.09877	0.213816	0.2252	-0.424358
201010_s_at	TXNIP	-0.0516119	-0.351113	-0.011445	-0.223115	-0.914594	-0.697663	0.00525379	-0.734064	-0.459666	0.201118	0.112306	0.295426	0.286391	0.649182	-0.304581	0.508539	0.0740318	-0.210996	0.0488977	0.0495548	-0.00525379	0.0769796	0.453698	0.43134	0.227258	0.707166	0.388654	0.45327	-0.382462	-0.381952	0.666898	1.6543	0.048378	-0.499661	-0.854841	-1.35281	-0.0483789	-0.424075	-0.0508003	0.202432	-0.951671	0.740309	-0.807564	-0.185878	0.460196	0.362762	0.59165	0.59561
201011_at	RPN1	-0.429934	-0.432439	-0.151484	-1.16362	0.460145	0.951334	0.550298	0.34458	0.447284	-0.0150194	0.228453	-0.484628	-0.180428	0.0150194	-0.378124	-0.420587	0.270664	-0.300667	0.511575	-0.177521	0.614391	0.165882	0.444973	-0.275253	0.154604	-0.438615	0.0898466	0.222922	0.120266	-0.174156	0.528709	1.02949	-0.0284243	0.0284243	-0.497571	-0.941067	-0.776368	-0.126655	-0.441419	-0.1429	0.127333	-0.5552	0.774628	0.526295	0	0.27	-0.502594	-0.222157
201012_at	ANXA1	0.0307894	-2.61637	-0.292158	-0.196231	-2.15741	-0.953653	0.593218	0.759928	-0.126029	-0.0307894	0.850393	0.463597	0.524343	0.590378	1.41534	-0.0331001	0.460474	-0.294507	1.11394	-0.343385	-0.34425	0.265233	-0.0911274	2.46992	1.18263	2.86422	3.01401	2.72415	1.39578	1.99395	0.0911274	3.00203	-0.414923	-1.45522	-1.47161	-0.25458	-1.51517	0.726958	-0.502637	-0.351822	0.685238	-0.269323	-2.56663	-0.424351	0.439839	1.41231	0.894249	0.964149
201013_s_at	PAICS	0.0798798	-0.881664	-0.50028	-0.284468	0.0357904	0.322237	-0.0515137	-0.095974	-0.00894546	0.0262585	0.0124722	-0.121147	0.0463219	0.00894546	0.0651569	0.405578	0.249284	-0.317673	-0.220306	-0.299122	0.24172	-0.0855389	0.798118	-0.0227366	0.194682	-0.646832	-0.381182	-0.259479	-0.00909519	-0.479694	-0.42789	-0.23225	0.00909519	-0.47227	0.31115	-0.747273	0.268023	0.552403	0.432034	0.609471	0.255514	0.0442209	-0.300145	0.321441	-0.00163078	-0.121758	-0.267425	0
201014_s_at	PAICS	0.312202	-0.832519	0.0648475	-0.732016	0.775744	0.591329	2.05153	2.23077	-0.600544	0.255352	-0.154696	-0.807138	-0.455977	-0.348639	0.0767369	-0.215669	0.9114	-0.226601	0.454458	-0.116068	0.270266	-0.0648479	0.630175	-0.239731	0.668679	-0.445447	0.129077	0.736234	1.02821	-0.884874	-0.281864	0.734407	-0.0522809	-0.805626	-0.582427	-2.10699	0.0599265	0.292527	0.0522809	0.398489	0.338209	-1.3162	-1.33381	-0.101069	0.344436	-0.310324	-1.16472	-0.527636
201015_s_at	JUP	-0.00230598	-2.29703	-1.28005	-0.916743	-0.767049	0.363302	0.177565	0.356122	0.221395	0.115282	-0.0707979	0.0351982	-0.405426	-0.121593	-0.00478077	0.00230598	-1.67107	0.523029	0.768405	0.185668	0.00417233	-0.182182	0.0297136	-0.0374203	-0.0297136	-0.151406	1.58093	0.803624	0.571079	0.29025	-0.866902	-0.98223	-0.621078	-0.657153	-0.197739	-1.03202	-0.328483	0.140129	0.0844946	0.0696688	0.396807	0.530035	0.152511	-0.390098	0.413486	0.125877	0.134738	-0.285707
201016_at	EIF1AX	0.274094	0.0270004	-0.140149	-1.20555	0.122741	-0.11531	0.196436	0.809751	-0.39314	-0.0270004	-0.112137	0.298578	-0.330237	-0.346025	0.154437	0.325368	0.661448	-0.430876	0.0351467	-0.228744	0.0703239	-0.044466	-0.158597	0.00119734	-1.11595	-1.25634	0.0835876	0.13337	0.677915	-0.411363	0.272042	0.713608	0.42433	-0.186674	0.363037	-2.44956	-0.276563	0.607597	-0.07619	-0.191046	0.539464	1.48951	-1.26812	-0.00119734	-0.0442424	-0.0490851	0.429831	-0.335074
201017_at	EIF1AX	0.482879	0.112999	-0.469334	-1.30137	-1.83214	0.0609589	1.14431	1.42509	-1.99976	1.01814	-0.0609584	1.65391	0.712404	0.892583	0.921	0.791145	-1.93226	-3.01759	-2.6616	-1.70167	-2.08262	-2.21398	-0.113574	-0.120306	-1.44653	-1.43417	0.417184	0.565734	1.05046	-1.5911	-0.314406	0.541476	-0.157864	-0.720715	0.715291	-0.943566	0.428546	1.52783	0.790264	1.12686	0.959381	0.113574	-1.93596	-2.60912	0.781232	-0.652936	1.22773	0.31601
201018_at	EIF1AX	-0.217407	-0.401775	-0.241714	-0.487331	-0.328552	-0.364372	-0.247303	0.139554	-0.708134	0.231287	-0.405602	0.601736	0.169118	0.181703	0.493634	0.784597	0.908712	-0.161897	0.383627	0.0302916	0.264232	-0.0302916	0.875131	-0.20538	-0.0765514	-0.363458	0.0179815	-0.0875187	0.224158	-0.390913	-0.00969028	0.556764	0.24196	-0.913732	0.351111	-2.11702	0.218641	0.90757	-0.0340624	0.010644	0.300509	0.00969028	-2.76175	-0.145705	0.118031	-0.481839	0.486767	0.103393
201019_s_at	EIF1AX	0.477748	-0.601744	0.0546761	-0.737965	0.426092	-0.781565	-0.18289	0.631192	-0.0238676	0.0757103	0.0238676	0.353878	-0.0594816	-0.260324	-0.0948105	0.166967	1.04407	-0.361395	-0.036047	-0.211342	0.522146	0.15802	0.478834	-0.178347	-0.143956	-0.943546	-0.172089	0.0319061	0.418001	-0.702397	0.577337	0.701718	0.282043	-0.0319061	0.213978	-1.62597	0.321981	0.346519	-0.253931	-0.374823	0.318581	0.116257	-0.209764	-0.781593	-0.00293064	-0.0656204	0.161856	-0.238742
201020_at	YWHAH	0.00846386	-0.381163	-0.267941	0.238997	-0.219577	0.48123	2.06446	1.2359	0.191051	-0.191594	-0.30557	0.107033	-0.0738878	-0.343752	0.0920281	-0.201703	1.08241	-0.0932179	0.164872	-0.132532	0.131907	-0.00846386	0.72721	-0.000185	1.32051	0.661358	0.000185	1.7128	1.02761	0.56286	1.0088	2.69286	-0.0909538	-0.119263	-0.583275	-0.186923	-0.192359	-0.48578	-0.337095	-0.181222	-0.00454283	-0.426192	0.378331	0.349643	-0.323438	-0.319431	0.0225081	0.0683684
201021_s_at	DSTN	-0.212534	-1.01365	-0.319738	-0.342234	-0.641713	-0.274612	0.507973	0.827618	-0.8179	0.289891	0.888973	1.02114	0.39179	0.126671	-0.0114994	-0.264579	-0.395922	0.668095	1.03367	0.195795	-0.390599	0.0114994	-0.0578518	0.223754	-0.630888	0.446789	0.367945	1.01476	0.797407	-0.651994	0.143253	0.122978	0.718293	-0.416318	0.0578518	-1.60149	-0.31987	-0.203035	0.486115	-0.415602	-0.168643	0.793318	-0.437935	-0.430037	0.475802	1.05444	1.22745	0.529884
201022_s_at	DSTN	-0.572196	-0.378466	-0.939523	-0.688982	-0.470593	-0.298309	-0.075264	-0.0989637	-1.03522	-0.261454	0.088068	0.237741	0.121276	0.249166	0.0111084	0.120883	-0.0111074	0.0957813	0.166886	0.057476	0.15674	0.342377	0.105326	-0.287275	-0.0289097	-0.298087	0.0593796	0.277449	0.14111	-1.13248	-0.147134	0.0913048	0.121889	-0.751678	-0.494244	-2.26081	-0.199406	0.0289097	0.145575	0.242097	0.381658	0.233433	-1.18363	-0.354628	-0.194663	0.140855	0.340037	0.209154
201023_at	TAF7	-0.589255	-1.03793	-1.2212	-0.76834	-1.11118	-0.640671	-0.123137	-0.278288	-0.102952	-0.0822983	0.039916	0.0871182	0.306108	0.419791	0.134609	0.490178	0.429879	0.206873	0.345663	0.126772	0.027256	-0.027256	0.0170383	0.133416	-0.00959396	-0.224463	0.00687885	0.118983	-0.00687885	0.34418	-0.545641	0.593755	-0.576671	-0.36505	0.0936976	-1.65631	-0.248536	0.389326	-0.122297	0.0435524	-0.0512981	0.0215569	-1.83673	0.327765	0	0.150495	0.257073	0.487489
201024_x_at	EIF5B	-0.718688	-2.76983	0.609767	0.0218048	0.141804	-2.54772	-1.21737	-1.18089	-1.10013	-0.817236	0.0867844	0.505095	0.29286	0.344925	0.424738	-0.56828	-0.123698	0.134595	-0.0218048	-0.237787	0.595367	0.137718	-0.0591631	-0.0967102	0.0247116	0.801818	0.726532	-0.394887	-0.481098	-0.0533237	0.0410805	-0.0247116	0.680351	0.176591	-0.0794496	-1.02939	0.340305	0.195146	0.875635	0.563179	0.62571	-1.43039	-0.159841	-0.107496	-0.633589	0.272972	0.662314	0.470861
201025_at	EIF5B	0.144265	-0.278043	-0.0295615	-0.523487	-0.14186	-0.12811	0.131472	0.0337028	-0.0571518	0.028913	0.582814	0.00995445	-0.00505972	0.00505972	-0.120011	0.262608	1.03811	-0.296809	-0.0864134	-0.434282	0.114136	0.094142	0.648652	0.0179758	0.691732	-0.332005	-0.509387	0.37562	-0.0266423	-0.131745	1.72023	1.33743	-1.11686	-0.21629	0.0595217	-0.81708	0.267258	0.00352001	-0.189991	-0.00351953	0.403515	-0.229523	-0.5997	0.0388098	0.141528	0.519513	0.0263686	0.0772762
201026_at	EIF5B	-0.132484	-0.201223	0.347426	0.197238	-0.139101	-0.644826	0.132483	0.305025	-0.224664	-0.195635	0.184443	0.590334	0.552376	0.362144	-0.152312	-0.90899	0.485514	0.219155	0.445062	-0.560124	-0.58588	-0.682166	-0.152652	-0.119686	-0.190791	0.531256	1.39418	0.0348492	0.316654	-0.502994	0.512781	0.240952	0.522773	-0.0350294	-0.509859	-0.302826	-0.479551	-0.558095	-0.0348492	-0.370383	0.0777435	0.283442	1.17018	0.0554142	-0.0745292	0.168812	0.513545	0.670075
201027_s_at	EIF5B	0.159236	-1.3905	-0.189252	-0.386769	-0.293407	0.100245	1.36579	1.3327	-0.602167	0.211844	0.0871439	0.0217371	-0.231403	-0.141545	-0.29962	-0.237818	0.459652	0.138737	0.174112	-0.283539	0.390264	-0.0217371	0.872427	-0.00372601	0.899692	0.00372601	0.0926838	2.05382	1.58133	-0.54689	0.50303	1.31525	-0.40265	-0.228187	-0.212084	-0.944764	0.040144	-0.153457	0.150702	-0.130299	0.167392	-0.710371	-0.214857	-0.100766	0.428126	0.114175	0.0886006	-0.0820003
201028_s_at	CD99	-0.235796	-0.626442	-0.394524	1.32373	-0.184405	-0.779416	0.332601	-0.196937	-0.523978	0.472451	-0.254614	-0.0554738	0.0900383	0.432674	0.0370412	-0.0370417	-1.53513	0.260202	0.582514	0.417525	0.151271	0.0408311	0.441195	-0.0998049	1.17383	1.83739	0.00736046	0.449586	0.189796	-0.00736093	-0.0544801	0.300134	0.328927	-0.489654	-0.403704	-0.882603	-0.0460072	-0.201914	0.328927	0.236916	0.0309067	-0.240604	-0.0115762	-0.162386	0.780736	-0.209054	0.150904	0.299112
201029_s_at	CD99	0.302906	-0.302156	0.164124	1.06369	-0.329516	0.327742	-0.224092	-0.519719	-0.29567	0.0474892	-0.118391	0.125746	0.321767	0.461658	-0.114738	0.0597467	-1.11263	-0.305515	0.157385	0.394629	-0.592696	-0.0474892	-0.537893	0.503794	0.624064	1.01004	1.21972	0.0331736	-0.125341	-0.278873	0.0151577	0.0979805	0.113929	0.0721092	-0.108124	-0.529054	-1.14015	-0.162213	-0.111678	0.0543594	-0.148953	0.184663	-0.0151577	-0.40361	0.524114	0.506936	0.608939	0.868211
201030_x_at	LDHB	0.166328	-1.077	-0.977711	-0.192174	0.42278	0.752708	1.03955	0.855224	-0.0586243	0.0349693	-0.0349693	-0.752253	-0.163376	-0.532789	-0.238334	-0.436273	0.730536	0.0768566	-0.324553	0.0403147	0.154851	0.216822	0.502298	-0.224756	0.642433	-0.823463	-0.836157	0.681475	0.664926	-1.03214	0.0573826	0.321355	-0.0862455	-0.122677	-0.114992	-1.5436	0.295265	-0.0573826	0.202566	0.0965948	0.0574989	-0.572634	-0.205304	0.349834	-0.148547	-0.201948	-0.947778	-0.377569
201031_s_at	HNRNPH1	-0.169007	0.863226	0.653545	0.896502	-0.328716	0.450169	1.36526	1.73928	0.386581	-0.0126057	0.0126057	-0.0573339	-0.14033	-0.075345	-0.431631	0.25475	1.44391	-0.53674	0.0461044	-0.607711	-1.23592	-0.659077	0.449646	-0.32212	-0.104589	0.619485	1.40701	1.0426	1.22827	-0.949892	1.40819	1.87593	-0.140996	0.486529	-0.517404	-1.74203	0.104589	-0.24168	-0.927547	-0.796184	-0.542536	1.35106	1.33519	-0.572712	0.132886	0.181434	0.0415449	-0.169974
201032_at	BLCAP	0.247369	-0.205091	-0.675849	-0.230419	-0.0301123	0.868557	0.939265	0.828434	0.0758915	0.12645	0.0407095	0.00242901	-0.12947	-0.236254	-0.699268	0.0565949	0.155355	-0.100183	-0.0635433	0.188274	-0.155174	-0.00242901	0.161253	-0.57001	0.406091	-0.961314	-0.289016	0.366471	0.354291	-0.905824	0.347828	0.153417	-0.0136442	0.0136442	-0.0801096	-0.963673	0.247648	-0.152198	-0.365562	-0.258363	-0.244215	0.175462	0.0598631	0.115564	0.0506554	-0.0155859	-0.083333	-0.22636
201033_x_at	RPLP0	0.25042	-0.222053	-0.569723	0.20155	0.119727	0.0607576	0.341171	0.206298	0.0891838	-0.11972	0.0662508	-0.295261	-0.0797739	-0.135974	-0.0328197	-0.136502	-1.40743	0.282372	-0.0067873	0.0977154	0.00678825	-0.119872	-0.0428476	0.393517	0.472899	0.449216	0.165349	0.111538	0.239486	-0.350454	-0.869733	0.0446453	0.0954056	-0.0686912	0.410375	-2.69002	-0.322452	0.0099535	-0.0634909	-0.0527506	-0.294967	-0.00995445	-1.11044	0.407505	0	0.235062	-0.265864	-0.0560045
201034_at	ADD3	-0.487711	-0.625377	-1.97317	-0.941521	-0.193543	-0.274434	-0.00649452	0.122425	-0.558187	0.00649452	-0.205469	0.0327129	0.0589132	0.0771132	-0.0828037	-0.0469618	0.209849	0.264439	0.133326	0.0566721	0.0625954	0.0802784	0.565716	-0.665379	-0.15442	-0.829702	-1.12762	0.698621	0.749848	-1.35757	-0.0171366	-0.0787668	0.209142	-0.289562	0.393387	-2.00373	0.0171375	0.523299	0.362929	0.321787	0.093008	-0.471237	-0.958336	0.32378	0	-0.223475	0.137578	0.0755472
201035_s_at	HADH	-0.0175457	-0.155321	-0.194777	-0.0126562	0.3593	0.34938	0.404562	0.558623	-0.249834	0.209855	-0.207329	-0.293164	0.0588236	-0.1006	0.0697537	-0.491281	-0.437236	0.22899	-0.528457	0.0729704	0.0815764	0.0126562	0.198449	-0.598269	-0.0910311	-0.633692	-1.55197	0.475298	0.502255	-0.650519	-0.854276	-0.912431	0.40728	-0.0101871	0.288625	-0.0725231	0.0101871	0.137156	0.0765142	0.0316839	-0.0753698	-1.15296	0.358335	0.976069	-0.000738	-0.424074	-0.457125	-0.144188
201036_s_at	HADH	0.55248	-0.0341024	-1.90476	-0.9582	0.251883	0.658089	0.770204	0.483614	-0.159687	0.701382	-0.129587	-0.266684	0.501226	0.00579453	0.047369	-0.00579453	0.38997	0.308579	-0.578429	-0.020731	-0.065299	-0.184742	0.101322	-0.469858	-0.143096	-2.39576	-2.51466	0.392486	0.250354	-1.43087	-0.044961	-0.958853	0.408249	0.0323305	0.69736	-1.04278	-0.116034	0.56152	0.591921	0.49466	0.360559	-1.37798	-0.0323296	0.368868	0.234945	-0.419785	-0.679453	0.188455
201037_at	PFKP	0.0792561	-0.877975	0.164583	-0.122554	0.0778389	-0.120658	1.1659	1.4842	0.334147	-0.511077	0.471334	-0.357626	0.102178	-0.165354	-0.185364	-0.252963	0.236238	0.418919	-0.361325	-0.540945	0.11301	-0.0778389	0.0490828	0.482337	0.323267	-0.0827045	0.527333	0.835491	1.02648	0.519277	0.0356684	0.666775	-0.902475	-0.0491066	-0.846624	-2.2398	-0.810833	-0.980965	0.226148	-0.572323	-0.0622349	-0.0356684	-0.382619	0.0489788	-0.542723	0.573395	-0.449733	0.0909176
201038_s_at	ANP32A	0.0658512	-0.212549	-0.618466	-0.102468	-0.140124	0.00141048	0.650362	0.20756	-0.307407	0.000776	0.0516338	-0.000776	-0.197861	0.192498	-0.0914946	0.462026	0.774012	-0.150771	0.0223818	-0.0662546	0.0323477	-0.160627	0.470017	0.0590258	0.225088	-0.539575	-0.464038	0.634941	0.477382	-0.616537	0.769308	1.05029	0.403058	-0.0893431	-0.0590258	-1.01713	-0.0661202	0.203481	-0.436777	-0.0910196	-0.25371	0.319536	-0.0711718	0.105535	0.0165281	0.0829735	0.0542774	-0.0744524
201039_s_at	RAD23A	0.074729	-0.805122	-0.69106	0.072042	0.365651	-0.259654	0.907867	1.66538	-0.059041	0.36912	0.289493	-0.0678725	-0.0592232	-0.609076	-0.157705	-0.708504	-0.714882	-0.141361	0.284967	0.51075	0.153575	0.059041	0.0803885	0.118453	-0.0937786	0.0609951	0.0424566	1.26421	1.32379	-0.29647	-0.531144	-0.785316	0.253497	-0.406469	0.0875158	-0.0905666	-0.12887	-0.24482	-0.0424566	-0.155819	-0.122625	0.2915	1.65328	0.254369	0.335915	0.232607	0	-0.0933495
201040_at	GNAI2	0.109445	-0.712302	-0.55579	0.199941	-0.104084	-0.502706	0.624699	0.20684	-0.278857	0.0947647	-0.0168433	-0.140336	-0.0815091	-0.0453529	0.0168428	-0.560541	-1.66737	0.172289	0.712317	0.687281	0.420145	0.105428	-0.329237	0.235417	-0.0182996	0.541513	0.959331	0.766316	0.546185	0.357811	-1.04721	-1.4152	0.085875	0.0182991	0.0494366	0.185464	-0.433312	-0.543798	-0.276254	-0.257361	-0.0961833	-0.471953	0.196289	-0.313362	0.623105	0.254926	0.10238	0.0700488
201041_s_at	DUSP1	-3.15541	0.0827608	-3.64618	-1.3536	-4.81992	-0.480695	-1.08756	0.582252	-0.0621767	-0.274566	0.213341	0.149026	-1.19747	0.561383	0.231256	-1.38378	0.504157	0.924377	1.05421	-0.214825	0.669664	0.0621767	0.218217	-1.98868	0.661713	-2.00571	0.457942	-0.461972	0.901861	0.853374	-0.235221	-0.577445	-0.153828	0.900555	-0.464012	-1.64604	0.780777	0.873936	-0.465446	0.153828	-0.316089	1.32849	-1.7492	1.6147	0	0.360716	0.390909	-0.886764
201042_at	TGM2	0.50731	-0.391817	0.23556	0.628324	0.198725	0.629737	1.21603	0.00218582	-0.00218582	-0.528955	0.166657	-0.244221	-0.212255	0.284808	0.294688	-0.0649738	-1.08109	-0.550559	1.12191	-0.801051	-0.691613	-0.561044	-0.236438	1.50635	0.510472	2.52729	2.99537	2.25192	0.089015	1.43048	0.308961	1.77428	-0.613044	-0.786969	-0.537726	-0.695531	-0.886569	-0.285021	-0.521815	-0.0190086	-0.514889	-0.228224	0.171913	0.0190086	0.308646	0.620371	0.636491	0.348357
201043_s_at	ANP32A	0.0258708	-0.0973492	0.144767	-0.0555024	0.155148	0.0172305	-0.165336	-0.179676	0.144522	-0.0505338	0.204567	-0.138731	0.221512	-0.105608	-0.0172305	-0.129488	-0.191265	0.161285	-0.189491	0.108241	0.167658	0.384254	0.152481	-0.161895	0.00371981	-0.0710573	-0.139768	0.146032	-0.137923	-0.00371981	-0.143009	-0.107994	-0.0275831	0.0633144	0.252792	0.352941	0.161711	0.25736	0.178401	-0.206101	-0.105009	-0.106021	0.736158	0.618898	-0.167002	0.026969	-0.440394	0.060585
201044_x_at	DUSP1	-0.197267	0.330953	-0.142437	-0.193815	0.324383	-0.120553	-0.754534	-0.647702	0.544548	-0.128048	0.0406852	-0.122339	-0.0406852	-0.0475512	0.0421329	0.162003	-0.15452	0.411552	0.661613	0.443929	0.856757	0.572086	-0.342233	-0.224713	-0.0379448	-0.00714207	0.000737	-0.895323	-0.510937	-0.000737	-0.420516	-0.658046	0.396027	0.0485201	0.174299	0.599337	0.0987768	-0.00842953	0.035387	0.155984	0.310068	-0.0782456	0.1327	0.353039	-0.19401	-0.0846982	-0.366671	-0.294945
201046_s_at	RAD23A	0.150882	-0.106727	-0.801571	-0.64865	0.0240593	0.464449	-0.3254	-0.422293	0.102145	0.180976	0.435829	-0.18642	-0.231616	-0.356751	-0.136875	0.0451117	-1.5176	0.0424213	0.140265	0.254482	-0.0240593	0.191319	-0.203559	0.690856	-0.0297222	-0.275903	0.0188723	0.0851107	0.350429	-0.167444	0.00673485	-1.0872	-0.165207	0.20198	0.635926	-0.146625	-0.278394	0.00887585	-0.00673485	-0.144638	-0.118696	1.04288	1.20806	0.442635	0.267895	0.556216	-0.186658	-0.0553865
201049_s_at	RPS18	0.368738	0.00395203	-0.00395298	0.267566	0.326542	-0.110067	0.0649185	0.368062	-0.0794134	0.00835037	0.037612	-0.509714	-0.498454	-0.489644	-0.167978	-0.384911	-1.38634	0.540735	0.409015	0.194863	-0.231248	-0.132484	0.00563431	0.534241	0.273378	0.516582	0.440843	0.00866127	-0.108995	-0.662061	-0.766035	-0.0239019	0.0554466	0.0986948	0.477497	-1.71904	-0.723392	-0.150436	0.0559454	-0.00563526	-0.104486	0.215288	-0.143599	-0.350702	0.169869	0.197337	-0.388276	-0.404609
201050_at	PLD3	-0.104849	-1.51868	-1.5323	-0.809416	0.104848	0.765146	-0.214044	-0.245963	0.655594	0.36851	1.01496	0.228998	-0.273501	-0.47629	-0.521032	-0.833759	-2.16562	0.874968	1.38948	0.751876	0.947022	0.647209	-0.0187621	0.514313	0.235624	0.410229	0.868675	0.626612	0.569568	0.383006	-0.506608	-1.03043	-0.4023	-0.888229	0.130309	-0.00849676	-0.461064	-0.505441	-0.447294	-0.0773368	0.0174265	-0.595418	0.00849676	0.504355	0.987667	1.43595	0.589552	0.2973
201051_at	ANP32A	0.52848	-1.84585	-0.0771761	1.03681	0.0211611	-0.478363	0.611425	0.0307474	-0.122138	0.322121	-0.287277	0.473707	-0.33412	-0.254352	-0.103273	-0.199544	-0.194084	0.383209	0.508676	-0.0211611	0.636787	0.364287	0.788734	-0.073699	0.325503	0.482057	-0.645019	0.470014	0.178125	-0.272697	0.337895	0.607313	0.76626	-0.631043	-0.684697	-0.612834	0.32837	-0.158919	-0.00833702	-0.0281057	0.00833702	-0.16257	-0.803596	0.848497	0.21581	-0.563423	0.363562	-0.424633
201052_s_at	PSMF1	0.429378	-0.486513	-0.384231	-0.45934	-0.0589123	-0.0945134	-0.341697	-0.372996	0.210896	0.0305428	0.390315	0.135992	-0.0305428	0.192153	-0.0927477	0.386268	-1.25207	0.452769	-0.0971975	0.503343	0.202686	0.0851212	-0.0266242	0.791195	-0.0859499	0.381843	0.0487623	0.131467	-0.508534	0.598455	-0.806267	-1.34698	0.56304	-0.418727	0.129625	-0.0600095	-0.377265	-0.199285	-0.125771	0.0539885	0.293372	-0.0650492	0.0266247	0.679836	0.183	0.539253	0.206861	-0.058104
201053_s_at	PSMF1	-0.140466	0.218587	-0.972844	-0.771067	-0.608125	-0.705327	0.238327	0.0431404	-0.0258808	0.0917444	0.23911	0.106913	0.0258808	0.382203	-0.500048	0.0965729	-0.308372	0.0993433	0.2064	-0.0880871	-0.455561	-0.278592	0.200321	0.497123	-0.756384	-0.466219	-0.537507	0.518131	0.189613	0.164882	-0.316976	-0.389633	0.0964975	-0.0185204	0.506598	-0.759923	-0.299263	0.0185204	0.029211	-0.167543	-0.935128	0.634644	0.453262	-0.384923	0.307049	0.51486	0.357555	0.275728
201054_at	HNRNPA0	-0.186374	-0.636246	-0.943173	-0.619393	-0.670747	-0.904754	-0.431552	-0.72313	-1.28799	0.057085	-0.14605	0.202239	-0.057085	0.192189	0.219565	0.539516	0.428947	0.0807791	0.524737	0.0706844	0.147943	0.233615	0.444318	0.119298	0.384828	0.083889	1.25248	0.26014	-0.154931	-0.865947	0.39176	0.755878	-0.472191	-0.197023	-0.238793	-2.34159	-0.232016	0.45721	-0.110901	-0.0204868	0.0204868	0.539296	-0.679785	-0.158555	0.13025	-0.0151157	0.329255	0.0126629
201055_s_at	HNRNPA0	0.367635	-0.535612	-0.0474806	0.349343	0.793398	-0.695233	-1.68664	-1.41588	0.0195827	0.285964	0.0293665	0.352967	-0.32436	-0.0713882	-0.330401	0.188233	0.0571389	-0.0736604	-0.431585	0.461076	-0.0195832	0.314028	-0.145815	0.923648	-0.0988617	0.402406	-0.822391	-1.55376	-1.49555	-0.217878	0.0289764	-0.589486	0.877528	0.448883	-0.114583	0.673666	0.245707	0.23719	-0.0289764	-0.661445	0.0432711	-0.592797	0.33276	0.128587	0.159529	-0.0782566	0.275304	-0.250787
201056_at	GOLGB1	-0.836206	-0.560692	-1.23507	-0.633548	-0.307041	-0.252584	-0.115798	-0.334861	-0.451176	0.200597	0.119401	0.640678	0.6329	0.594713	0.314222	0.376	-0.314154	0.242222	0.631755	-0.0155344	0.167068	0.0155339	-0.214121	-0.663079	-0.00933838	-0.661597	-0.104731	0.139683	0.00967741	-1.0826	0.00933838	-0.45888	-0.504329	0.161886	0.303699	-0.659401	0.101424	0.217759	0.113998	0.318309	0.232786	-0.191667	0.0726585	-0.21251	0.21192	0.176636	0.731864	0.598767
201057_s_at	GOLGB1	-0.272079	-0.982985	-0.973265	-0.537723	-0.168212	0.0241861	-0.746148	-0.614766	-0.615469	0.0724888	-0.0598307	0.225298	0.336915	0.65462	0.416179	0.267874	-0.0241861	0.249118	0.309284	0.0592432	0.229571	-0.0762348	0.345411	-0.186887	0.292632	0.0978518	0.241296	-0.0890045	0.0553274	-0.282214	-0.366699	-0.0571318	-0.177594	-0.332736	0.265718	-1.11382	-0.0553274	0.260306	0.1487	0.329722	0.126234	-0.730672	-0.226072	0.290824	0.270391	-0.0646524	0.350397	0.332028
201058_s_at	MYL9	-1.70291	-1.57483	-3.35456	-1.49414	-2.02386	0.0136662	-2.27199	-1.41807	0.310604	0.418336	0.753224	0.499015	-0.0136662	0.222429	-0.121554	-0.293353	-0.9012	1.20923	1.5827	1.63986	0.692455	0.52173	-0.00862169	0.267188	-0.417694	1.29176	1.07555	0.338513	-0.107913	1.79287	-0.659788	-0.787981	1.55519	-0.183666	-0.134131	0.00862169	-0.898352	-0.146611	0.0887713	-0.694909	-0.500258	0.617752	0.654765	0.393223	1.54826	1.77301	1.61975	1.04412
201059_at	CTTN	0.0534077	-0.461839	0.0177107	-0.0177107	-0.153905	0.303681	-0.0442305	-0.271493	-0.0442448	0.145372	0.0222034	0.259891	0.110479	0.15375	0.129748	0.102352	-0.595946	0.0849028	-0.026145	-0.0920754	-0.27733	-0.164046	0.243248	0.255163	0.392858	-0.0316029	-0.0116854	0.132378	0.0116844	-0.536562	0.374065	0.526614	0.0577145	0.344	-0.146845	-0.98654	0.0625782	-0.0660305	-0.278032	-0.0310402	0.0137205	-0.347311	-0.185036	-0.589512	0.146634	0	0.267962	0.112118
201060_x_at	STOM	0.49757	0.896367	0.546233	-0.277945	0.114499	-0.0172129	0.0479498	0.123186	-0.703788	0.0172129	-0.420311	-0.114828	0.0869894	0.289012	0.679058	0.244258	-0.0333138	-1.01548	-0.332648	-0.832649	-0.3007	-0.39733	0.333434	-0.49855	0.318511	0.362953	0.0965376	-0.244567	-0.086174	-1.42055	0.494755	0.145442	-0.613964	-0.823994	0.00994396	-0.643664	0.282543	0.565483	-0.00994396	0.500878	0.699013	-0.419115	-0.28572	-0.103548	0	-0.415458	-0.10261	0.100069
201061_s_at	STOM	0.488318	-0.0098629	-0.239903	-0.58836	0.153797	0.530446	0.20931	0.258541	-0.145405	0.140117	-0.355607	-0.275496	0.00986195	0.108663	0.532942	0.263524	-0.28808	-0.0672893	0.208371	-0.428395	-0.131149	-0.439892	-0.0139208	-0.00270557	0.557453	-0.243272	-0.629049	0.0308828	0.31334	-0.768447	-0.416585	-0.193383	-0.229057	-0.00739574	0.723444	-1.3312	0.00270557	0.619365	0.418621	0.474491	0.823833	-1.0298	0.177794	0.41394	0	-0.430974	-0.385817	-0.0594873
201062_at	STOM	0.0504425	-0.0925009	-0.118945	0.134839	0.199969	0.0109832	0.168257	-0.0110767	-0.00795531	0.0083437	-0.0666792	-0.0855439	-0.0385625	0.048218	0.245	0.061197	0.00795531	0.0485871	-0.157928	-0.0402591	-0.178179	-0.233351	0.00738478	-0.0862775	0.00965691	-0.257425	-0.145422	0.240981	0.0528755	-0.056994	-0.0683875	0.063673	-0.00738454	-0.0981865	0.179109	0.309796	-0.185668	0.185597	0.0277667	-0.129711	0.244146	-0.150095	-0.0328686	0.105475	0	-0.0858905	-0.0626707	-0.0139852
201063_at	RCN1	0.395221	0.25573	1.04281	0.793188	-0.189149	-0.125341	0.185413	0.0942345	-0.0288601	0.0288601	0.290605	0.15775	-0.288098	-0.111113	-0.270583	0.193954	1.08894	-0.101957	-0.293133	-0.294433	-0.133192	-0.0303564	-0.0211782	1.41531	1.24974	1.49425	2.16283	0.325324	0.587607	0.810932	0.971547	1.44684	-0.214183	0.0211782	-0.32119	-1.00129	-1.07242	-0.572118	-0.814773	-0.688645	-0.29139	1.05234	-0.220025	-0.652611	0.214478	0.445017	0.434345	-0.0827427
201066_at	CYC1	0.174706	-0.755065	-2.06396	-0.679283	0.58199	0.91442	0.248854	-0.0873089	0.0749769	-0.337839	0.117417	-0.660628	-0.148978	-0.0854836	0.0152454	-0.0152454	-1.87783	0.32305	0.401533	0.659625	-0.124805	0.06038	-0.163636	0.103029	0.658843	-0.7269	-1.03496	-0.270015	-0.103029	-0.236405	-1.29059	-0.774608	0.181051	-0.868777	0.525168	-1.54586	0.131138	0.487328	0.497057	0.690244	0.449485	0.749178	-0.38496	0.638074	-0.417991	0	-0.793752	-0.28861
201067_at	PSMC2	-0.19057	-1.37879	-1.58621	-0.684058	0.0887089	-0.28555	-0.121227	0.00452614	-0.456425	0.190213	-0.325713	-0.00452614	0.218539	-0.244523	0.00555325	-0.270415	0.382777	0.0741625	0.330982	0.278977	0.645679	0.40459	0.325151	-0.384948	0.551153	-0.839991	-0.462683	0.124329	0.204002	-0.522005	-0.204535	0.0127363	-0.130491	-0.362022	-0.0127363	-0.725203	0.0817413	0.317938	0.584556	0.400703	0.536471	-0.0216389	-0.407484	0.284823	0.161159	-0.407087	-0.0472326	0.140584
201068_s_at	PSMC2	-0.0416727	-1.10508	-0.652358	-0.493952	0.0500689	-0.0709696	1.12216	1.09867	0.183308	-0.0598059	-0.092144	-0.366665	-0.307554	-0.122889	-0.201211	0.0416727	0.825757	0.291718	0.367284	0.0682516	0.371581	0.232446	1.06598	0.0772047	0.522688	-0.0119562	-0.0163784	0.940639	0.653523	-0.202264	0.384311	0.875523	-0.170487	-0.971851	-0.00271797	-1.76715	0.00271797	-0.0733585	-0.107155	0.090601	0.196381	-0.655066	-1.40054	0.761107	-0.0855007	-0.097971	-0.281919	-0.214429
201069_at	MMP2	1.23111	0.413794	0.305015	0.326025	0.199874	0.162107	0.241506	-0.00467968	0.227984	-0.276068	0.172588	-0.317789	-0.102032	-0.204293	-0.109699	0.00467968	-0.100015	-0.216715	0.0543919	-0.220369	-0.331474	-0.63585	-0.360814	0.248349	0.375416	1.03284	3.02464	0.202005	-0.49979	0.629042	-0.263371	0.291133	-0.429491	0.0594015	-0.546803	0.349595	-0.108397	-0.059401	-0.234044	-0.197574	-0.171782	0.242434	0.860507	-0.349885	-0.300426	0.257984	-0.202578	-0.0880089
201070_x_at	SF3B1	0.157874	-1.14535	-0.344827	0.566683	0.000936	0.274961	1.66854	1.1957	-0.843663	0.773078	-0.00250912	0.594453	0.00287724	-0.666581	0.0959616	-1.27724	-0.000936	0.0127707	-0.0641775	-0.559089	-0.321527	-0.454222	-0.0468426	-0.248293	0.236833	0.490275	1.28335	1.62659	1.34415	-0.518588	-0.523028	-0.271588	-0.350485	-0.28414	-0.114338	-0.498895	-0.0459185	0.223743	1.00419	0.133747	0.294393	0.124815	0.0459185	-0.448435	0.738869	0.0179157	0.622719	-0.00178337
201071_x_at	SF3B1	-0.287445	-0.612391	-0.388547	-0.382918	-0.6077	0.0771265	0.539756	0.404407	-1.28493	0.0338478	-0.309678	-0.157362	0.0630188	0.136854	0.114477	0.165894	0.343584	0.361026	0.472992	-0.432113	-0.0338478	-0.317484	0.431351	-0.35918	0.411171	-0.410121	0.246181	0.59487	0.395288	-1.03697	-0.13883	0.807323	-0.315538	-1.01135	0.142283	-2.3606	-0.222643	0.401115	0.309964	0.408568	0.13883	-0.876556	-2.41515	-0.225998	0.114553	-0.263802	-0.0586653	0.155937
201072_s_at	SMARCC1	0.906444	-0.205753	0.807718	0.32184	-0.657589	-0.294673	0.756351	0.616697	-0.627248	1.0674	0.0525565	0.122765	0.262607	-0.134356	-0.0520053	-0.349913	0.0520053	0.0994987	-0.697704	-0.434288	-0.195872	-0.510711	0.402032	-0.0354619	-0.245211	-0.365689	0.750695	0.465089	0.36886	-0.801603	0.547541	0.320882	-0.076509	0.558201	0.406763	0.569884	0.153404	-0.0112419	-0.0377345	-0.62459	-0.154125	-0.979529	0.0112424	-0.711157	0.903288	0	0.0470104	0.0403304
201073_s_at	SMARCC1	-0.21113	0.00721788	0.341372	0.175159	0.337078	-0.225685	0.274319	0.481407	-0.0179443	-0.0168443	-0.0181918	0.0256357	0.0876574	-0.0824366	0.0992651	-0.00721788	-0.147995	-0.0483093	-0.133572	0.0385394	0.0729504	-0.191782	-0.000527	-0.00434971	0.0488281	-0.0919638	0.612994	0.35887	0.162345	-0.302812	0.224732	0.000527	0.221331	0.0814056	-0.483886	-0.0299358	0.291927	0.0407467	-0.0312405	-0.0299358	-0.186795	-0.159061	0.599733	-0.15405	-0.0392051	-0.191039	0.0432839	0.146502
201074_at	SMARCC1	0.245131	0.189083	-0.186884	-0.287859	0.142024	0.487006	1.29919	1.19672	-0.346653	0.112117	-0.111245	-0.15754	-0.167105	-0.0108604	-0.0117245	-0.125803	0.418726	0.0577373	0.0598001	-0.070447	0.0108604	-0.442784	0.831828	-0.193667	0.273015	-0.260405	0.795665	0.831585	1.20881	-0.570951	0.876907	0.669019	-0.124393	0.00109768	0.0133104	-0.65766	0.113394	-0.120054	-0.309721	-0.00109768	-0.267399	-0.427862	0.0618134	-0.164336	0.0786066	-0.135887	-0.195518	-0.183319
201075_s_at	SMARCC1	0.0188675	0.581874	0.115351	0.0370741	-0.137093	0.277739	2.33708	1.92947	-0.0188675	0.398015	-0.20476	0.115894	-0.328823	-0.0201631	-0.296711	-0.190872	0.177602	-0.030539	-0.0861859	-0.134724	0.313466	-0.0537415	1.49807	-0.457127	0.640036	-0.355847	0.833501	1.76972	1.83874	-0.152765	1.18699	1.42063	-0.471366	-0.32477	-0.337085	-0.604531	0.362673	0.176657	0.0152493	-0.0313458	-0.0152493	-0.83336	-0.734491	0.0401216	0.36728	-0.0935264	0.289609	-0.374273
201076_at	NHP2L1	-0.191961	0.032877	-0.371089	-0.0788441	-0.203777	0.717394	0.0279531	0.343029	-0.076251	0.0982599	0.25658	-0.0271568	-0.0124502	-0.186123	-0.173964	-0.339051	0.483109	0.0124502	-0.0628433	0.478266	0.158979	0.155601	0.0388203	-0.0320196	0.83729	0.02355	-0.241157	-0.143007	0.0762997	-0.0392799	0.480822	0.178064	0.398454	0.64502	0.0327816	-0.485505	-0.102275	-0.38669	-0.439911	-0.351473	-0.0508566	0.27122	-0.02355	0.0380735	0.0207996	0.216354	-0.075242	-0.105664
201078_at	TM9SF2	-0.143702	-1.17749	-0.0602913	-0.201395	0.152939	0.355093	1.45549	0.947393	-0.327303	-0.0244675	-0.123201	0.0263767	0.00217438	0.272101	-0.00217438	0.171787	0.301767	-0.287643	0.425352	-0.505577	0.176851	-0.0132599	0.788177	-0.147272	0.582516	-0.00605774	1.10551	1.17384	0.80905	-0.735041	0.164311	1.10412	-0.798088	-1.42613	-0.432066	-1.9672	-0.387589	0.00605774	-0.0952587	0.0646934	0.387737	-0.931304	-1.26055	0.35035	0	-0.189471	0.0842476	0.0551472
201079_at	SYNGR2	-0.0220861	-0.306677	-0.396721	0.192059	0.0632629	0.774266	0.369255	0.111788	0.391456	-0.322817	-0.0061903	-0.370687	-0.223183	-0.212766	-0.281149	-0.101716	-1.973	0.0061903	0.30682	0.316919	0.529545	0.268124	-0.0578699	-0.116541	0.267056	0.302404	0.817247	0.309538	0.121781	0.977679	-0.61732	0.0578699	-0.365173	-0.497914	-0.31926	-0.753167	-0.583204	-0.193411	-0.152649	0.15654	0.423906	0.259653	-0.15583	0.114143	-0.013792	0.333179	-0.0187492	-0.02141
201080_at	PIP4K2B	-0.53803	-0.356859	-1.11863	-0.617171	-0.119427	0.171506	-0.0265293	0.301007	-0.208834	-0.0583982	0.18688	0.329079	0.191601	0.235778	0.0946708	0.048049	-0.161643	0.0044775	-0.00447702	0.0657372	0.0621367	-0.220467	-0.0189762	0.0592389	-0.0316524	-0.3733	0.108109	0.164769	0.484683	-0.264114	-0.343892	-0.143411	0.13646	-0.0247765	0.263451	-0.026978	-0.198451	0.0681195	-0.0503731	0.0235028	0.0189757	-0.63921	0.139513	0.0988955	0.0236087	0.331216	0.367826	0.280683
201081_s_at	PIP4K2B	-0.117839	0.556154	-0.0916724	-0.0134444	0.163202	-0.0467496	0.26211	0.0134444	-0.18427	-0.133801	-0.076695	-0.0348425	0.0304117	-0.194664	0.209226	0.229126	-0.0607762	0.178204	-0.0760098	0.413898	0.0296125	0.0694146	-0.0167608	-0.0986938	-0.215576	-0.117646	-0.0504813	-0.152823	0.0624814	-0.481797	0.343585	-0.210505	0.260062	0.257568	0.0233455	0.555749	0.128952	-0.0960207	0.0486536	0.0167608	-0.0471873	0.0648389	0.737614	-0.193571	-0.220342	-0.241304	-0.223544	-0.140479
201083_s_at	BCLAF1	0.34849	0.137335	0.103263	0.0779433	-0.1019	-0.446477	2.59131	2.22934	0.623268	0.416293	0.24579	-0.109445	-0.0779433	-0.31299	-0.484642	-0.437718	0.0852728	-0.324493	0.365881	-0.13785	-0.425537	-0.102141	1.2799	-0.119397	-0.236047	0.172574	0.511012	2.26591	1.38686	1.18684	1.69532	1.70306	-0.523457	-0.340362	-0.0994649	-0.261828	-0.000271	-0.000639	-0.147995	-0.405716	0.000271	0.534991	-0.0935931	0.944292	0.485077	0.408663	-0.0341301	-0.120328
201084_s_at	BCLAF1	-0.349721	-0.974685	-0.728635	-0.289885	-0.385464	0.0469894	1.15883	0.859912	-1.36156	-0.0669174	-0.107703	0.409739	-0.0469894	0.444945	0.473605	0.607263	0.879707	-0.110434	0.27504	-0.637347	0.441351	0.437546	0.244192	-0.761028	0.234926	-0.630507	0.682332	0.894646	0.617189	-1.43473	0.114546	0.358759	-0.677139	-0.653322	-0.394103	-3.19922	-0.54456	0.392556	-0.114546	0.328327	0.478829	0.419401	-3.35409	-0.668317	-0.306467	-0.338368	0.178732	-0.336596
201085_s_at	SON	0.0166416	-2.26256	-0.199419	0.491981	-0.916606	-1.85738	1.30532	0.498403	-1.11155	-0.0166416	-0.0640659	0.764343	0.649401	0.34327	0.418406	-1.42515	-0.128604	0.656142	1.03602	-1.4702	0.43097	-0.654247	-0.0669584	-0.325938	0.582269	0.261146	1.64244	1.78501	1.69878	-0.742732	-0.658223	-0.111241	-0.238751	-0.166163	0.0669584	-1.00364	0.239832	-0.592792	1.38579	0.79872	1.2572	-0.63681	0.372301	-0.561063	0	0.045167	0.812746	0.787667
201086_x_at	SON	-0.375048	-0.434247	-0.0716486	0.0716486	-1.53623	0.329616	0.38745	1.15146	-1.27526	0.0970087	-0.432574	0.167679	0.121202	0.265584	0.220658	0.350989	0.259055	-0.457706	-0.374216	-0.840073	-0.377106	-0.37267	-0.243998	-0.860978	-0.0332403	0.0332403	0.302629	0.418504	0.562932	-1.30141	-0.300015	0.76884	-0.631402	-0.389721	0.0738096	-1.48254	-0.276348	0.420159	0.0926466	0.271856	0.18029	0.118481	-2.31484	-1.01995	0.176805	-0.378794	0.263901	0.224489
201087_at	PXN	0.508178	0.237951	-0.562781	-0.304146	0.0210533	0.206176	0.444225	-0.00656462	-0.145739	0.0385056	0.176576	-0.14419	0.00656462	0.155975	-0.0166087	-0.0897002	-0.222029	0.159976	0.324471	-0.199014	-0.429685	-0.373854	0.125583	-0.206255	0.0295944	-0.891525	0.103942	0.370522	0.366868	-0.746359	-0.219854	0.0214252	-0.181002	-0.1834	0.131927	-0.416638	0.147246	-0.0214252	0.147077	0.293413	0.153881	-0.0223885	-0.254486	-0.201816	-0.0528359	0.139956	-0.192487	-0.206462
201088_at	KPNA2	0.0508518	0.0900974	0.367214	-0.221865	-0.535	-0.803078	0.413769	-0.0349121	-0.0711737	-0.58195	0.263841	0.414093	-0.0811806	0.0217628	0.309561	0.0210276	0.30231	-0.57346	0.288208	-0.558214	-0.0210276	-0.108141	0.817669	0.402525	-0.0416231	0.627543	-0.149191	0.675536	-0.123291	0.930084	1.31857	1.43165	-0.196066	-0.558724	-0.236391	-1.45057	-0.233964	0.226557	0.0416231	-0.328622	0.0913124	-0.626425	-0.638668	0.481331	-0.303286	0.627593	0.708578	0.19805
201089_at	ATP6V1B2	0.525161	-0.424013	-0.87386	-0.426192	0.605369	1.79088	2.02638	2.35067	-0.248459	0.28139	-0.186524	-0.526656	0.0397634	-0.0921259	0.146102	0.129376	0.771127	-0.256798	-0.49175	-0.195167	0.620181	-0.0397634	1.32383	-0.908769	0.354599	-1.7668	-0.902412	1.17722	1.60468	-1.47561	-0.161789	0.107505	-0.107505	-1.27888	0.247986	-2.37875	0.418573	0.478048	-0.275965	0.45471	0.506241	-1.78862	-0.931303	0.86116	0.205839	-0.42169	-0.62571	-0.159815
201090_x_at	TUBA1B	0.694184	-1.32911	-1.0665	0.000704	-0.065012	1.32282	2.15742	1.31956	1.14701	0.246023	-0.000704	-0.378999	-0.685416	-1.10758	-0.359301	-1.09681	-0.723557	0.0890379	0.379918	0.0949507	0.200036	-0.174392	0.537342	0.774057	0.0782061	0.781308	0.741551	2.15685	1.26497	0.996815	-0.403754	0.414938	-0.331471	-0.390122	-0.243057	-1.43858	-0.667121	-0.467013	-0.0111952	-0.789767	-0.579976	-0.647407	0.0111952	0.858565	0.564188	0.365359	0.0150299	-0.275831
201091_s_at	CBX3	-0.0263777	-0.0591192	0.126917	0.0685282	0.30324	-0.180623	0.794854	0.671178	-0.264432	-0.0599184	0.0451345	0.0469246	-0.0504646	-0.137905	0.0258532	-0.0894823	0.185415	-0.134797	-0.121463	-0.0258532	0.0272264	0.332095	0.0787516	-0.0129652	0.0129652	-0.59054	-0.255119	0.235205	0.198422	-0.807105	0.549223	0.973506	0.0292416	-0.259342	-0.523668	-0.958894	-0.237403	0.0158596	-0.0753994	0.0334501	0.401871	0.420762	-0.158508	-0.678552	-0.125429	-0.0816412	0	-0.116779
201092_at	RBBP7	-0.203707	-0.645599	-0.343502	-0.58228	-0.044589	-0.516418	0.29957	-0.00384331	-0.984299	-0.338974	-0.0847492	0.0567312	-0.00187492	0.144779	0.20559	0.141833	0.00690079	0.110847	0.422892	0.00187492	0.172531	0.0901422	0.193639	-0.02075	0.360388	0.02075	0.555825	0.46542	0.21139	-1.11621	-0.268231	0.300351	-0.0943861	-0.2727	-0.360318	-1.8511	-0.173123	0.503044	0.375363	0.264029	0.336326	-0.152775	-1.20136	-0.370542	-0.354264	-0.152507	0.0219488	0.0311241
201093_x_at	SDHA	-0.189986	-0.93706	-0.804256	-0.450162	0.465788	0.991703	1.59448	1.41761	-0.0393562	-0.113847	-0.0939102	-0.624066	-0.311074	-0.432757	0.0393562	-0.668792	0.250387	0.267367	0.179368	0.147218	0.506118	0.183686	0.655629	-0.474083	0.361177	-0.784029	0.0378704	0.820641	0.963666	-0.596784	-0.592862	-0.0850534	-0.00337029	-0.908481	-0.573415	-1.33446	0.00337029	-0.672176	0.113821	0.154296	0.324327	-0.730052	0.568936	0.367829	-0.272464	-0.226785	-0.738859	-0.423332
201094_at	RPS29	0.260583	0.730379	0.628898	0.582554	0.236427	-0.269834	-0.0733557	0.13095	0.237741	-0.042552	-0.117527	-0.146549	-0.0385189	-0.132997	-0.0984163	-0.0280161	-0.3448	0.274776	0.0893068	0.028017	-0.189704	0.219471	0.115622	0.0579033	-0.0388994	0.497948	0.233895	-0.099925	-0.0524015	-0.690725	0.280267	0.32536	0.220981	0.395908	0.344	-0.676619	-0.104152	-0.0472221	-0.0899916	-0.00242615	-0.0973453	0.500602	-0.0265856	0.0024271	-0.0081768	-0.0788727	-0.0982723	-0.0188227
201095_at	DAP	0.0395575	-0.672701	-1.34829	-0.693517	-0.148499	1.0693	1.64167	1.22515	0.607294	0.121526	0.092	-0.371211	-0.242565	-0.40325	-0.35671	-0.290213	-1.09025	0.547642	0.633017	0.617421	-0.00487328	0.00487328	0.756962	-0.00452423	0.469366	0.160061	-0.0766687	1.48378	1.11632	0.710646	-0.893748	-0.572451	0.447004	-0.862057	0.341827	-1.65183	-0.329824	-0.385328	-0.0229425	0.00452423	-0.389706	0.280224	-0.619863	0.960928	0.3379	0.222957	-0.220515	-0.148998
201096_s_at	ARF4	0.125015	-0.851294	0.33474	-0.532485	0.105227	-0.0454888	1.40646	1.3155	-0.608411	-0.606739	0.0917721	0.130211	-0.128596	-0.320737	0.410003	0.075098	-0.63066	-0.246062	0.0454884	-0.106395	-0.113824	0.273769	-0.0508051	0.0304117	0.168044	0.395791	1.38501	1.52547	1.16892	-0.932607	-0.623068	0.774312	-0.0304117	-0.855448	-0.220919	-2.09997	-0.35613	0.819819	0.519855	0.108113	0.469482	-0.103866	-0.866157	-0.446043	-0.470477	0.166923	0.285835	-0.0155349
201097_s_at	ARF4	0.157841	0.178358	-0.301598	-0.930774	-0.611185	-0.120744	0.429131	0.237165	-0.567425	-0.20538	0.0876236	0.0362558	-0.0290337	0.200323	0.125837	0.0634661	-0.118102	-0.174132	0.0290346	-0.190908	-0.188437	0.0895567	-0.201652	0.0853176	0.323419	-0.15351	0.265983	0.548966	0.1288	-1.0617	0.484768	0.870463	-0.362703	-0.0941334	-0.538438	-1.4162	-0.456201	0.0383549	-0.0383549	0.244729	0.0538082	0.208362	-2.26051	-0.45833	-0.154299	0.153591	0.0683947	0
201098_at	COPB2	-0.24004	-1.37076	-0.760705	-0.641799	0.280293	-0.281276	0.149717	-0.133291	-0.826061	-0.341797	-0.331348	0.00023	-0.0286837	0.167896	0.177679	0.0280247	0.211175	0.338465	0.555871	-0.00023	0.167208	0.342099	0.371728	-0.0812397	0.190659	-0.0329037	0.556124	0.173759	0.32065	-0.79875	-0.0514765	0.74386	-0.183187	-0.676183	-0.0609503	-1.33226	-0.0783854	0.333719	0.398501	0.693948	0.436368	-0.74493	-1.76467	0.0329037	-0.376551	-0.375717	-0.018218	0.00776482
201099_at	USP9X	-0.445706	0.244315	0.0937729	-0.340015	-0.823955	-0.793861	-0.217504	-0.259861	-0.567608	0.00705433	-0.532798	0.248374	0.456693	0.249945	0.209448	0.480925	0.342564	-0.0927715	-0.00335407	-0.579211	0.00335407	0.0633183	0.447187	-1.01157	-0.00787258	-0.00349617	-0.233951	-0.271065	-0.0402584	-0.502422	0.987159	0.906593	-0.504238	0.0948429	0.273311	-1.45351	0.332315	0.52267	0.39655	0.388741	0.35426	-0.137885	-1.11139	0.00349617	-0.0149031	-0.475023	0.233624	0.341785
201100_s_at	USP9X	-0.31459	-0.420887	-0.271501	-0.275412	-0.235522	-0.217516	-0.398318	-0.0074501	-0.462882	0.317723	-0.0742941	0.061327	0.130014	0.110705	0.156272	0.182174	0.0887108	0.0074501	0.233197	-0.0964184	0.451763	0.354516	0.151144	-0.436633	0.057518	-0.0784044	-0.0442362	-0.00638104	0.00638104	-0.713459	0.19706	-0.396193	-0.654835	-0.924088	0.282281	-0.951004	0.328907	0.111445	0.190638	0.136106	0.103737	-0.404622	-0.0815163	0.14448	0.198522	-0.12424	-0.0852299	-0.0400619
201101_s_at	BCLAF1	0.916319	-0.478623	1.07688	0.679708	-0.916452	-0.36473	2.27812	1.7236	-0.98451	0.97318	0.00717306	1.45627	-0.00717354	0.836202	-0.119495	-0.755961	1.25874	-0.36887	0.345328	-0.993656	-0.995795	-1.34617	0.531954	-0.325574	0.92212	0.904291	1.76645	1.67062	1.02503	-0.5242	1.8485	0.827968	1.60476	-0.00488615	-0.0121493	-0.731856	-0.196306	-0.0990896	0.408509	-0.678916	0.00488615	-0.794756	-1.12101	-0.871723	1.03963	0	1.59167	-0.111666
201102_s_at	PFKL	0.444484	-0.0901804	-0.142653	-0.31548	0.297344	1.10673	0.154482	0.241626	0.0280752	0.438939	0.120915	-0.220152	-0.0827351	-0.0221729	-0.271139	-0.433331	-1.02864	0.318807	-0.339541	-0.0719271	0.0221729	0.0515642	-0.520678	0.131743	0.0264025	-0.0790272	-0.351414	-0.368747	0.135667	-0.108484	-0.681299	-0.91805	0.350375	0.459511	0.56776	-0.000263	-0.116122	-0.0526209	0.135612	0.206163	0.000263	-0.393176	0.266652	0.347406	0.191061	-0.064765	-0.423485	-0.346926
201105_at	LGALS1	0.0842981	0.124565	-0.0842981	1.0494	-1.06959	-1.97966	-3.06939	-3.02047	1.69491	0.668952	1.19253	-0.603703	-0.865206	-0.618887	-1.11917	-0.953018	-3.16504	1.05279	1.92536	1.16526	0.443144	1.1199	0.813107	2.9295	0.931304	4.25376	0.347833	-0.505084	-1.25261	2.754	-0.449126	0.859724	1.43473	0.168374	0.115452	-0.142004	-0.87818	-0.231704	-0.816011	-1.6424	-1.09274	-0.341954	-0.115452	0.770125	2.08688	2.64378	0.763983	0.542432
201106_at	GPX4	0.735286	-0.80081	-1.18237	0.195705	0.963042	0.851628	0.338356	0.354231	0.239213	0.0195446	0.134087	-1.14528	-0.978005	-1.46891	-1.08346	-1.11185	-2.79233	-0.042449	-0.386215	0.661659	-0.0195446	0.0288839	0.279666	0.909051	0.31445	0.612791	-1.1728	0.619659	0.657453	0.511802	-1.08683	-0.757705	0.62871	-0.400239	1.07231	-1.53444	-0.0845232	-0.419084	-0.266179	-0.806436	-0.562619	0.0100431	-0.0100431	0.960591	0.47966	0.504322	-0.804605	-0.591275
201107_s_at	THBS1	-0.397413	0.588292	0.300646	-0.133782	0.237493	0.147753	-0.43711	-0.161571	-0.339253	-0.321354	0.21172	-0.0292716	-0.0187922	-0.270711	0.137603	0.107687	-0.12673	0.0775485	-0.171048	0.0309229	0.0187922	0.123746	-0.488123	-0.192563	0.0123634	0.0639524	-0.279901	-0.285703	-0.407113	-0.0244503	-0.104555	-0.726306	2.1e-05	0.211525	0.0780926	0.581246	-2.1e-05	0.0630245	0.0803728	0.204405	0.165684	0.078094	-0.0010972	-0.173832	-0.286458	0.0713434	-0.0105219	-0.0154901
201108_s_at	THBS1	0.0537119	-0.77231	0.14254	-0.723433	0.185632	-0.36948	-0.52593	-0.55891	-0.972746	0.217903	-0.135213	0.222905	0.483956	0.479902	0.655752	0.108541	-0.131766	0.435981	-0.310227	-0.409089	0.108631	-0.0537119	0.0107889	-0.155544	0.410937	0.387917	0.215546	-0.626711	-0.339058	-0.746097	0.0612078	-0.480517	-0.670376	-0.669446	0.123285	-0.38138	0.783618	0.929446	0.837472	1.07594	0.922688	-1.82007	-0.186059	-0.0107889	0.0277767	-0.322172	-0.0621834	0.39226
201109_s_at	THBS1	-0.69842	-0.451644	0.771429	-0.459276	-0.0524816	-1.54119	-0.61334	0.526199	-0.565677	0.0524816	-0.339316	0.294876	0.302107	0.71844	0.590387	0.461124	-0.822297	0.159281	0.164694	-0.903103	0.0659561	-0.0710235	-0.604434	-0.547715	0.25718	0.886209	1.14753	-0.221989	0.129884	0.131104	0.325288	0.294124	-2.16388	0.0915236	-1.2054	-1.27848	-0.0305161	0.735679	0.0984588	-0.741862	0.0305157	-0.292425	-0.763052	-1.45182	0.458515	0.00388575	0.59241	0.679719
201110_s_at	THBS1	0.839118	1.24622	-0.0717382	-1.23417	0.260766	-1.04862	1.57446	3.96758	1.23535	0.888881	1.40947	-0.153011	-0.0150242	-0.0598073	-0.0714216	-0.101893	0.297049	0.0150237	0.484262	-0.68395	-0.57935	-0.365057	0.59991	0.270729	-0.0844488	0.0844488	1.23701	1.41902	2.76672	1.59017	2.51528	2.87091	-2.2482	2.08005	-1.58344	-1.20519	-0.143901	-0.261439	-0.883069	-1.69875	-0.593638	2.32961	-1.52788	-0.64689	1.1091	1.25408	0.231118	0.447445
201111_at	CSE1L	-0.103401	0.241909	0.987726	0.0688648	-0.551498	-0.452803	0.103001	-0.129072	-0.0301352	-0.228772	-0.065712	0.0173826	-0.349583	0.107596	-0.00591755	0.134022	0.228212	-0.249878	0.141978	0.00591755	-0.231545	0.229267	0.0252619	0.250571	0.0537586	-0.374759	-0.596022	-0.0300722	-0.177214	0.0412168	0.897074	1.08222	-0.216283	0.991529	-0.267586	-0.702194	-0.0288649	0.221695	-0.366979	0.118987	-0.0026474	0.871304	0.0026474	-0.536525	-0.204279	-0.180581	-0.0975103	-0.390456
201112_s_at	CSE1L	-0.479918	-2.08432	-2.06941	-0.678769	0.227926	0.0595245	1.0927	0.519454	-0.105548	-0.326312	-0.142152	-0.212695	-0.455852	0.0873909	0.0112696	0.544652	0.222466	-0.0112696	0.0227137	-0.0274	0.48766	0.302822	0.109416	-0.146805	0.40649	-0.909855	0.0133829	0.483717	0.0224009	-0.259579	-0.363502	-0.0133829	-0.569981	-1.92877	-0.38523	-3.64272	-0.303236	0.542515	0.282518	0.582794	0.540475	0.0331297	-1.80622	0.41736	-0.321749	-0.266144	-0.245903	-0.495181
201113_at	TUFM	0.819368	-0.0518618	-0.770043	-0.447885	0.998457	1.36752	0.865879	0.930601	0.102406	-0.00516987	0.0653591	-0.420721	-0.00788403	-0.296351	-0.281177	-0.405917	-1.04544	0.00516987	-0.0503006	0.625291	0.294775	0.38768	0.0300512	-0.0950851	0.842631	-0.584888	-0.0300512	-0.16587	0.0348959	-0.37875	-0.612472	-0.718155	0.120708	0.165476	0.147759	-1.17059	-0.0641031	-0.252899	0.254535	0.426369	0.686032	-0.363541	0.312473	0.407889	-0.215649	-0.154509	-0.658938	-0.248134
201114_x_at	PSMA7	0.362936	-1.09872	-0.413509	0.178462	-0.0297747	-0.686613	0.201226	0.126926	-0.425382	0.101122	-0.542706	0.0345554	-0.0214815	0.149685	0.0214815	-0.218838	-0.344784	0.424264	0.242888	0.14269	-0.0783081	-0.195144	-0.138824	0.535591	0.583717	0.0289383	-0.253859	0.314038	0.40126	-0.628342	-0.697898	-0.112123	0.597342	0.292675	0.156286	-1.10805	-0.264901	0.28496	0.0191202	0.0687132	-0.0191202	-0.607316	-0.289886	-0.518642	0.00119305	-0.697155	0.0275669	-0.0409412
201115_at	POLD2	0.126145	-0.342126	-0.429112	-0.799424	0.526945	0.793249	0.643189	0.508669	0.289076	-0.155143	0.531979	-0.3591	-0.405006	-0.377527	-0.307282	-0.277828	-0.602909	0.534342	0.537596	0.566546	0.350774	-0.126146	0.275984	0.719339	0.00928783	-0.442391	-0.0644021	0.541431	0.738326	-0.017066	-0.10194	-0.461397	0.444622	0.0289559	0.699507	-0.826304	-0.178166	-0.391182	-0.246826	-0.00928783	-0.24274	0.603987	0.15765	0.440596	-0.0922346	0.498228	-0.288702	-0.395123
201116_s_at	CPE	0.319143	0.260069	0.337224	0.237226	0.0845017	-0.185496	0.882426	1.14729	0.217705	-0.527563	0.579171	0.192202	-0.315465	-0.220238	-0.0917177	-0.0845022	-0.184816	-0.126272	-0.193508	0.153671	-0.243061	-0.2871	-0.133982	0.238344	-0.196625	0.510118	1.07313	0.530579	-0.0141678	1.47859	-0.02279	1.34176	-0.261469	-0.831635	-0.486271	-0.284149	-0.58317	-0.359321	-0.17118	0.0141678	0.181859	0.934554	0.0501227	0.347654	-0.454624	0.789882	0.251789	-0.130001
201117_s_at	CPE	1.08759	-0.154874	0.858066	0.834138	-0.110063	-0.121267	0.341071	1.13896	0.19442	-0.613438	1.0112	0.177686	-0.727327	0.0386958	-0.0147805	-0.24358	0.668155	-0.480386	0.0147805	-0.71968	-0.518783	-0.883885	-0.153222	0.534956	-0.376898	0.404804	1.04946	-0.225695	-0.221944	1.06462	0.691701	1.8427	-0.096704	-0.0811696	0.298738	-0.999204	-1.01635	0.181864	-0.596118	0.0811701	0.517797	2.90306	-0.469788	-0.346771	-0.508106	1.03442	0.243413	-0.626468
201118_at	PGD	-0.0885162	-1.20968	-2.07544	-0.645327	0.645831	0.743164	0.915792	0.954463	0.610025	-0.171484	0.271594	-0.400527	-0.976325	-0.691492	-0.682795	-0.789598	-0.523711	0.0885158	0.54747	0.55664	0.715817	0.526	1.31085	-0.160171	1.14671	-0.641753	0.179784	1.04393	0.923816	0.728649	0.163819	0.695384	-0.386739	-1.12708	0.054152	-0.119809	0.255516	-0.21206	-0.112443	-0.198341	-0.054152	-1.10732	-0.496665	1.03122	0.20674	0.657913	-0.0677481	-0.584689
201119_s_at	COX8A	0.135519	0.531639	0.0265503	0.0323286	0.733637	0.180843	-0.855013	-0.694825	0.610418	-0.0891953	0.00377178	-0.713129	-0.646601	-0.754781	-0.812666	-0.613821	-1.18361	-0.0177593	-0.00377178	1.32996	0.112993	0.403611	-0.0805073	0.208633	0.188625	0.420204	-1.18314	-0.908674	-0.555934	0.062746	-0.062746	-0.791395	0.371057	0.553205	0.378592	-0.177601	0.340835	-0.378624	-0.150571	-0.372135	-0.296062	0.69428	0.310641	0.963496	-0.0503407	0	-0.710243	-0.613017
201120_s_at	PGRMC1	0.278049	-0.840224	-0.433099	-0.717813	1.74359	0.0662375	2.09156	2.19883	-0.0662375	0.347981	-0.388301	-0.73266	-0.235895	-0.625185	-0.164952	-0.134899	-0.214606	0.570764	0.420428	0.330987	0.358878	0.382283	1.35784	-0.944825	0.276617	-0.805265	-1.72941	1.50958	1.60843	-1.06161	-0.201204	-0.0349736	-0.362279	-0.584294	0.0720882	-0.978671	0.0349731	0.130077	0.152882	0.404965	0.578907	-1.40229	-0.257436	0.413685	0	-0.83234	-1.22295	-0.710108
201121_s_at	PGRMC1	0.105393	-0.782756	-1.64109	-1.14578	0.31579	0.26838	0.46112	0.326175	-0.729199	0.100915	-0.417053	-0.261205	0.0889521	-0.0950508	-0.024291	0.209823	0.12387	-0.0211878	-0.32537	-0.214483	0.146677	0.0211887	0.360546	-0.347084	0.0324087	-1.58938	-1.17249	0.258358	0.338781	-1.58108	-0.0324097	-0.0439453	0.17802	-0.424398	0.170159	-1.9399	-0.0440702	0.582924	0.274586	0.635291	0.558387	-0.813195	-1.91841	0.199236	0.00572014	-0.474815	-0.364493	0.042347
201122_x_at	EIF5A	0.070734	0.803748	0.443759	0.247576	0.446903	0.353755	0.216031	-0.473713	0.113715	0.126511	0.19763	-0.0707336	-0.215257	-0.381347	-0.457053	-0.542955	-0.808377	-0.231995	-0.205193	0.289754	-0.564462	-1.08749	-0.509966	0.404981	-0.365111	0.0388546	-0.0252962	0.380603	0.00811386	-0.438208	-0.00811386	0.152658	0.519928	-0.34382	0.104476	-0.334414	0.0685577	-0.0858555	-0.65362	-0.80859	-0.523986	0.235101	0.810524	0.348979	0.137649	0.115886	0.234965	-0.0202074
201123_s_at	EIF5A	0.795313	-0.486086	-0.692476	0.68054	1.19504	-0.233396	0.0949564	-0.377513	-0.13567	0.464079	-0.204422	0.36079	-0.315918	-0.416812	-0.0738411	-0.478052	-0.523877	0.0738411	0.393445	0.793995	0.461217	0.919116	0.00796127	-0.413737	0.502238	0.515443	-0.253966	-0.146978	-0.603638	0.205815	-0.162025	0.213581	0.153808	-0.389928	-0.554115	0.112764	0.721804	-0.00796127	0.589148	-0.152521	0.985954	-0.712101	-0.259117	0.608659	0.064208	-0.560593	0.127829	-0.449491
201124_at	ITGB5	-1.97906	-0.913675	-1.23809	-0.331129	-2.89336	-1.506	-2.33565	-1.6776	-0.100397	0.818599	0.596714	1.40218	1.41682	1.31214	0.440119	1.2463	0.171728	-0.110956	0.537422	-0.186428	0.376806	0.100397	0.262108	0.0544324	0.19087	0.302801	-1.48065	-0.215454	-0.392346	-0.0266514	-0.0585194	0.57488	-0.0394936	-0.315918	-0.238289	-0.57752	0.0599174	0.489183	0.208677	0.500224	0.484334	-1.33364	-0.404511	0.0266519	1.13493	0.87742	1.79515	1.70311
201125_s_at	ITGB5	-0.606419	-0.600471	-0.210681	-0.141606	-1.11645	-0.774666	-0.806799	-1.07473	-0.0701704	0.434163	0.525977	0.854663	0.66709	0.953322	0.309165	0.337803	-0.440045	0.44493	0.619367	0.070199	0.0701704	-0.191696	-0.245195	0.572826	0.113503	0.737933	-0.112524	0.0395842	-0.379405	-0.0211983	-0.320776	0.300276	0.068284	-0.0252914	-0.527574	-0.938201	-0.0709419	0.0211983	0.0551186	0.100652	0.0838919	-0.400453	-0.152733	0.121237	0.879786	0.990959	1.31961	1.20938
201126_s_at	MGAT1	-0.15291	-0.660423	-0.329019	-0.386941	-0.452626	0.0501795	-0.138781	-0.0180616	0.00451374	-0.00451374	0.127195	0.293489	0.105861	0.4714	0.0280342	0.0161629	-0.706064	0.14205	0.847425	0.0484734	-0.185146	-0.213045	-0.510477	0.0959644	-0.00624943	0.528032	1.24175	0.142248	0.0841694	0.198994	-0.952709	-0.801634	-0.446645	-0.417963	-0.0901556	-0.420598	-0.244665	-0.0624285	0.00624943	0.113247	0.106628	0.0790186	0.0676661	-0.0421057	0.216952	0.318251	0.547034	0.309536
201127_s_at	ACLY	0.00752306	-0.0807767	0.00997067	-0.00752258	0.618154	0.873746	1.05882	1.0894	-0.0170574	-0.111672	-0.0717063	-0.330098	0.0860415	-0.181348	0.0112462	-0.626021	-0.0868368	0.106496	-0.122209	-0.0503564	0.0126305	0.0430808	0.306877	0.109942	0.0398688	-0.657453	-1.08186	0.690715	0.705324	-0.609625	-0.0371733	-0.139373	0.0371733	-0.823225	0.127702	-0.317521	0.277364	-0.208898	-0.0483727	0.0967288	-0.117862	-0.969481	0.554291	0.453555	-0.0904512	-0.0721946	-0.334534	0.0679917
201128_s_at	ACLY	0.204423	-0.022481	-0.0779076	-0.564439	0.335982	1.04094	0.602885	0.478821	0.10867	0.103154	-0.315605	-0.197641	0.0633917	-0.103503	-0.108176	-0.270926	0.916865	-0.143939	0.022481	-0.177592	-0.0956011	0.17915	0.47025	-0.252974	0.283958	-0.783816	-0.640738	0.355913	0.449264	-0.7778	1.06155	0.534479	-0.358213	-0.37376	-0.0562735	-1.37815	0.0551119	0.0889034	-0.115491	-0.0551119	0.060935	-1.17846	0.718322	0.119346	0.0591316	-0.480416	-0.263939	-0.0202332
201129_at	SRSF7	-0.0485687	0.263494	0.522286	0.0298271	-1.26876	-0.933126	-0.319235	-0.0298271	-0.551322	0.0382605	-0.176596	0.667873	-0.265366	0.235287	0.215316	0.0993795	-0.816986	0.0783176	0.37232	0.101931	-0.257294	-0.196466	-0.220373	0.0037756	-0.19698	-0.000645	-0.322114	-0.364206	-0.253585	-0.0699444	-0.059103	0.0615053	0.3458	0.141981	0.211799	-1.02068	0.0765896	0.845389	0.143766	0.000645	0.657741	1.85607	-1.42472	-0.364688	0.150173	-0.0843639	0.888555	-0.134448
201130_s_at	CDH1	-0.30137	0.192644	0.124021	0.0331464	-0.241344	-0.0881643	-0.230011	-0.286452	0.13976	-0.0158687	-0.000148	0.0107818	0.143698	0.0116763	-0.241831	-0.207784	-0.223103	0.0248265	-0.302015	0.000148	0.0287294	0.0549617	-0.0836425	-0.00832605	-0.252494	-0.0810022	-0.129618	-0.0454011	-0.0440297	0.154732	0.201426	-0.0329804	0.0849681	-0.0616927	-0.0589147	0.300451	0.130518	0.0202136	0.088481	0.00832605	-0.264569	0.372779	0.847076	0.127007	-0.0267296	0.0354218	-0.0115452	0.0437121
201131_s_at	CDH1	-0.00203323	-2.40142	0.0235176	0.450088	-0.724101	-0.158082	1.59003	0.460675	0.3235	-0.966932	0.145468	0.00203323	-1.0853	-0.585632	-0.250004	-0.139845	0.675915	0.11941	-0.378738	-0.384819	0.335567	0.0729561	0.409682	-0.942999	-0.200279	0.299958	0.6012	0.889903	-0.192132	0.0159979	0.157851	0.733359	-1.08505	-0.222651	-1.76802	-2.63475	-0.751992	0.121161	-0.0159979	0.113225	0.194304	0.317191	-2.12369	-0.0830202	-1.03292	0.141046	0	-1.14374
201133_s_at	PJA2	0.183875	-2.18006	-0.201566	-1.03184	-0.325877	-0.249969	1.20014	1.08985	0.363273	0.0820589	-0.463199	-0.0416622	-0.0201674	-0.0645037	-0.304903	0.145295	1.04256	-0.664161	0.127448	0.0201674	0.763863	0.406299	0.510827	-0.494329	-0.0390644	-1.8135	0.874687	1.34978	1.23251	-0.00640678	1.08678	0.920706	-0.609951	-0.60727	-0.192751	-0.914298	-0.268654	0.23977	-0.282873	-0.513841	0.00640678	0.307021	0.0932112	0.74744	0.211142	-0.528492	0.0626726	-0.035861
201134_x_at	COX7C	0.254481	0.631754	-0.0371904	-0.0435591	0.598288	0.296855	-0.39041	-0.0816574	-0.0789022	0.129602	0.188128	-0.049263	-0.00339508	-0.260681	-0.167863	0.00339508	0.206292	0.260125	-0.120926	0.115817	-0.0134926	0.168358	0.160928	-0.149521	0.17858	-0.378465	-0.5049	-0.569418	-0.282032	-1.25584	0.208395	-0.12182	0.353957	0.304186	0.558117	-1.08628	0.176887	-0.0262432	0.0682974	0.0262432	-0.0833769	0.436669	0.275166	-0.266629	-0.0191803	0.0551815	-0.14984	-0.124778
201135_at	ECHS1	0.12506	-0.666088	-2.1067	-0.611699	0.543466	0.775309	0.946091	1.05691	-0.133335	0.139711	-0.170095	-1.05462	-0.314361	-0.425615	-0.027029	-0.226724	-0.326161	0.535555	0.175719	0.107388	0.360221	0.02703	0.439655	-0.232626	0.518281	-1.32049	-1.99051	0.963666	1.23319	-0.914276	-0.343917	-0.569401	0.217633	-0.0333681	0.595819	-1.18308	-0.148958	-0.0487356	0.474363	0.571844	0.501232	-1.69147	0.0333691	0.537567	0.0323801	-0.241211	-1.20348	-0.381394
201136_at	PLP2	0.275352	-0.380034	-0.153585	0.703231	-1.29004	-1.08787	-0.202302	-0.469469	0.174167	-0.0847797	0.372426	0.129956	-0.802485	0.19917	-0.232836	-0.318954	-0.727464	0.0847797	0.292954	0.366714	0.312716	0.529587	-0.458584	1.24896	1.35134	2.2659	2.1152	0.362935	0.000784	1.48765	0.177836	1.02074	-0.357188	-0.0830064	-0.813025	-0.000784	-0.617019	-0.547029	-0.288155	-0.466681	-0.334888	1.20123	0.0998111	-0.0223565	0.627827	1.0244	0.77114	-0.0547276
201137_s_at	HLA-DPB1	1.01609	-1.36803	1.25211	2.53136	1.0021	-1.36671	-0.217043	0.348489	0.332431	-0.27983	-0.306274	0.186648	0.0628481	-0.489422	-0.0505238	-0.417827	-0.73342	0.0505238	1.36086	-0.257427	0.227772	-0.796892	0.703134	1.10283	1.87789	3.05738	1.87411	-0.224017	0.140204	1.73032	0.126595	1.61387	0.255034	-0.615292	-0.62705	-1.53898	-0.702273	-0.498117	-0.462883	-1.90435	-1.66368	-0.126595	-0.964662	0.198207	0.0827417	0	0.772252	0.313897
201138_s_at	SSB	-0.157359	-1.63896	-0.305081	-0.383531	0.0954003	-1.41238	0.728164	1.05592	-0.666313	0.00165844	-0.134167	0.411348	-0.112802	-0.474405	-0.00165844	-0.617116	1.57391	0.642653	0.826236	1.13636	0.634451	0.297555	0.593578	-0.227126	-0.358414	0.201991	0.807307	1.3507	1.17512	-0.300832	-0.267642	0.495983	0.0919161	-0.709134	-0.138772	-1.01557	0.0958819	-0.253518	0.230824	-0.242697	0.0134072	-0.173282	0.438178	-0.0134068	0.227041	0.0384512	0.602579	0.10947
201139_s_at	SSB	-1.03405	-2.42009	-0.575675	-1.12608	-0.916636	-0.961139	-0.215719	-0.12062	-0.848372	-0.0818481	0.344618	0.303573	0.382993	0.329676	0.450041	0.61668	0.702064	0.0818481	-0.0938625	0.273708	0.188124	0.25577	0.321081	0.00392723	-0.0327482	-0.451685	-1.0141	0.25251	0.319981	-0.525087	0.589322	0.809653	-0.00392723	-0.92031	-0.16749	-2.01745	-0.176378	0.486944	0.10284	0.0452003	0.20838	-1.10575	-1.47152	0.104261	0.0161028	0.462086	0.420341	0.478659
201140_s_at	RAB5C	0.560546	0.101448	-0.247937	-0.533213	0.0821171	0.776951	-1.64721	-1.45851	-0.276402	0.697948	0.772491	-0.771808	0.0488071	0.0445175	0.0679855	0.340788	-0.684181	-0.109628	-0.648979	-0.0462213	0.127427	-0.0445175	-0.592265	0.606405	0.393165	-0.578883	-0.933838	-0.976493	-0.788131	-0.879373	-0.666571	-1.14861	-0.0369792	0.658715	1.51735	0.42699	0.431713	0.449184	-0.19281	0.0369787	0.540729	-0.646935	0.150325	0.401066	0.486046	0.76066	-0.810732	-0.104755
201141_at	GPNMB	-1.04999	-0.723047	-1.55461	0.172213	-2.45181	-0.570173	-0.983761	-0.401863	-0.66184	0.861033	1.05328	0.725687	0.305408	0.635144	-0.261882	0.0043335	0.868054	0.588559	0.282472	0.492088	-0.0680399	-0.0043335	-0.0504398	0.835467	0.509867	0.349673	2.64523	0.071382	0.0567827	0.387811	0.0291471	1.48321	-0.891288	-0.73457	-1.87136	-2.39601	-0.638304	0.185406	-0.243819	-0.164691	-0.088727	-0.0291471	-2.13433	0.465011	1.22262	1.28782	0.970985	0.613616
201142_at	EIF2S1	-0.172856	-0.485582	0.14823	-0.339177	-0.0405474	-0.414222	0.129405	0.254474	-0.282785	-0.24558	-0.36679	0.34503	0.206062	0.322647	-0.149227	0.379417	0.453371	-0.115189	0.522259	0.0405474	-0.268756	0.251669	0.446033	-0.456984	-0.112466	0.281168	1.00783	0.511141	0.489516	-0.703028	-0.359774	0.379111	0.178697	-0.136146	-0.695342	-0.791322	-0.00979424	0.320683	-0.256454	0.00979424	-0.40372	0.0275278	0.542529	-0.806986	0	-0.158427	0.582777	0.369037
201143_s_at	EIF2S1	0.512101	-0.646542	-1.15062	-0.569112	0.355813	-0.020802	0.378366	-0.114179	0.020802	-0.855014	-0.100147	0.842618	-0.832539	-0.0940094	-0.636642	-0.192941	0.903571	0.333831	0.628141	0.526835	0.412519	1.66404	0.309004	-0.35359	-0.531402	-1.83383	1.14323	1.01953	-0.00796604	0.00796604	0.824543	0.866683	-0.374871	-1.67702	-1.93825	-1.0957	0.205908	0.213993	0.172002	-0.0416217	0.266657	-0.264732	0.107266	-0.638784	-1.13456	-0.322808	0.905022	-1.02621
201144_s_at	EIF2S1	0.0630627	0.191475	-0.441589	-0.464777	0.235535	0.119946	0.342532	0.270033	-0.17306	-0.0737295	-0.139465	-0.19138	0.0806026	-0.0455294	0.0699425	-0.0301781	0.504051	0.0963106	-0.202351	-0.181339	-0.0359974	0.0301781	0.317767	0.33937	0.00417233	-0.346797	-0.636433	0.27863	0.186841	-0.136514	-0.38482	-0.0162001	-0.0692701	0.137594	0.259016	-0.79392	-0.0295992	0.0118189	0.221169	0.0726309	-0.00417233	-0.32467	-0.270427	0.265412	-0.142228	-0.249938	-0.229738	0.069994
201145_at	HAX1	-0.058157	0.489287	-1.02199	-0.66141	0.339242	1.01662	-0.187519	-0.00111103	0.571088	0.00111103	0.397361	-0.131242	-0.122108	-0.247537	-0.227051	-0.0548601	-0.520218	0.545908	0.692917	0.968548	0.280024	0.224246	0.226901	0.0947208	0.151683	0.0251398	0.245257	-0.343542	-0.116766	0.191877	-0.933109	-1.19937	0.105251	-0.259749	0.881856	-0.753951	-0.0272751	0.00790119	-0.00790119	-0.24054	-0.258603	0.55897	-0.0124445	0.905438	-0.126721	0.260036	-0.190509	-0.203596
201146_at	NFE2L2	-0.211964	-1.46862	-1.12861	-1.17755	-0.645033	-0.245403	0.135552	0.223967	-0.406559	-0.162131	0.229823	0.345137	0.120876	0.153669	0.360565	0.352901	0.384532	0.114252	0.704367	-0.498277	-0.114252	-0.133856	0.18074	-0.130503	0.458487	-0.187101	0.273126	0.901742	0.235601	-0.621058	0.377623	0.971295	-0.185964	-1.03184	-0.150231	-2.36479	-0.142939	0.851438	0.271906	0.0928488	0.103649	-0.0928488	-2.73174	-0.176212	-0.0190916	0.38907	0.383279	0.293831
201147_s_at	TIMP3	-0.478495	-0.504346	-1.39522	-1.31389	-0.400986	-0.48194	0.579781	0.0444722	-0.0444722	0.174947	0.226137	0.666978	1.07446	0.63673	1.55654	1.29296	0.465353	-0.0788422	1.74221	-0.0621014	-0.252092	-0.0531693	0.551409	-0.0490875	-0.126538	0.0759983	-1.02445	1.03666	-0.0102282	0.0102282	-0.147562	0.161677	-0.374591	0.142476	-1.04624	-0.803906	-0.855723	0.646244	0.209041	-0.409213	0.306813	0.276291	-0.753653	0.151829	0.365059	0.46612	0.886594	1.48335
201148_s_at	TIMP3	-0.599549	-0.574549	-0.222583	-0.518847	-0.492847	-0.421564	-0.392897	-0.947548	0.205544	0.350786	0.0112095	0.0886488	0.448369	0.300899	0.655768	0.498415	0.289169	-0.555938	0.519751	-0.364157	-0.0112095	0.168136	0.32137	-0.434428	-0.409625	-0.0439596	0.00623894	-0.0780287	-0.824858	0.0795717	0.527409	0.722233	-0.00623894	0.843394	-1.10223	0.256581	-0.152171	-0.326645	-0.187642	-0.570247	0.294209	0.0419664	0.414859	0.144086	0.245001	-0.192045	0.0431766	0.272789
201149_s_at	TIMP3	-0.0186496	-0.1576	-0.111886	0.0314984	-0.23601	-0.499088	0.686109	-0.112101	0.425176	0.926779	-0.14652	0.286321	0.994427	0.580227	1.3206	0.678243	-0.319017	-0.00116873	1.44329	0.00116825	-0.110982	-0.014401	0.648806	-0.154829	-0.283624	-0.214138	-0.500009	1.55725	0.160905	0.4458	-0.413741	-0.440895	-0.13648	0.301112	-0.126311	0.16488	-0.251047	0.0317049	0.0740428	-0.000394	0.215621	-0.399342	0.000394	0.423051	0.800667	-0.331652	0.221879	1.10691
201150_s_at	TIMP3	-0.946355	-1.93771	-3.06884	-0.756935	-1.73303	-0.470153	-0.150684	-0.143471	0.123908	0.604394	0.372619	0.7939	0.495302	0.361247	0.972574	0.723974	-0.311557	0.0468245	1.44744	-0.0778208	-0.0468245	0.0614042	0.803477	-0.544981	-0.294889	0.123427	0.863307	1.15676	0.123927	0.732508	-0.800607	-0.0575676	0.165656	-1.22371	-1.066	-1.38257	-0.63057	0.0575676	0.281213	-0.118416	0.539951	-0.36934	-0.916446	0.775842	0.802817	0.567269	1.08315	0.800493
201151_s_at	MBNL1	0.117087	-1.36538	0.841357	0.771372	-0.624376	-0.988475	1.29191	1.76502	-0.627273	0.0628018	-0.533852	0.602115	0.417609	0.074728	-0.0635791	0.628274	-0.136972	-0.0942903	0.917275	-0.688199	-0.56145	-0.0628018	-1.13635	-0.965887	0.767334	-0.0123	1.2627	1.06241	0.520683	-1.02946	-0.133719	0.635139	-0.593413	0.254522	0.0123	-0.892074	-0.356908	1.63446	0.653072	0.0132432	0.0728593	-1.32672	-0.887707	-0.823863	0.00423002	-0.444497	0.485702	0.468235
201152_s_at	MBNL1	0.814227	-1.20686	1.25816	1.25694	-0.30558	-0.615086	1.89392	1.89756	0.0521975	0.57829	-0.0550833	0.252403	-0.00343323	-0.195623	-0.261067	-0.328334	0.302441	0.00343323	0.500144	-0.554545	-0.0593863	-0.168608	-0.386567	-0.139857	0.0792475	0.171033	1.17614	1.44461	1.23014	0.0250702	-0.222676	0.687169	-0.637429	-0.0647478	0.243575	-1.11409	-0.195493	0.0964766	0.188771	-0.0250702	-0.0617857	-0.212692	-1.5916	0.199086	0.460611	-0.276722	0.198134	-0.102497
201153_s_at	MBNL1	-0.00567913	0.284461	0.114861	0.496617	-0.416645	-0.219075	0.381993	0.798726	-0.338365	0.0401392	-0.0791368	-0.0588207	0.00567913	0.0179768	-0.0756874	0.136308	0.0302639	-0.423539	0.0486307	-1.143	-0.510949	-0.343818	0.302314	-0.0604458	0.156977	0.446842	0.782722	0.230779	0.384646	-0.461618	0.499231	0.931853	-0.917688	-0.349971	0.218857	-1.81566	-0.270928	0.344007	-0.00244522	-0.0520687	-0.053463	0.00244522	-1.62054	-0.179959	0.170054	0.0479116	0.0568304	0.103214
201155_s_at	MFN2	0.110414	-0.339256	-0.184474	-0.293475	0.0167418	0.292492	0.9311	0.929646	-0.00566006	0.0599442	0.00200939	0.774116	-0.00200939	-0.166767	-0.0524931	-0.17325	-0.283043	0.333263	0.799018	0.15383	-0.197958	-0.42884	0.114715	0.084384	-0.0145349	-0.885366	-0.70295	1.04763	1.11929	-0.393543	-0.551856	-0.0815382	0.413011	0.627229	0.0145349	-0.212208	0.0532351	0.158485	0.339819	-0.183291	-0.0766172	-0.185748	1.2129	-0.148446	0	-0.0525723	0.821423	-0.128454
201156_s_at	RAB5C	0.535599	-0.155472	-0.850667	-0.721928	1.32794	0.452698	0.062089	-0.112321	0.104405	0.188587	0.0191011	-0.318439	-0.0191007	-0.42562	-0.227345	-0.372685	-0.882941	0.166415	-0.340317	0.606005	0.375812	0.190673	0.313985	0.0351853	0.0946074	-0.298198	-0.700913	0.483071	0.259018	-0.3002	-0.357722	-0.971025	-0.151069	-0.0671101	0.73295	0.574371	0.832109	-0.131516	0.398662	-0.0351858	-0.0489206	-0.329067	0.609631	0.572128	0.400721	0.31351	-0.223172	-0.00811958
201157_s_at	NMT1	0.0197449	-0.936269	-0.514026	-0.0679789	-0.0387516	-0.0104637	0.473965	0.430609	-0.115248	0.0196466	0.0104637	0.19902	-0.0894098	-0.133724	-0.198267	-0.460439	-0.190029	0.762547	0.692697	0.321403	0.067193	0.0319748	0.118045	0.272507	0.0584588	0.405409	-0.0584588	0.699927	0.453356	-0.0967932	-0.672243	-0.160609	0.0994601	-0.449991	0.344739	-0.939501	-0.40319	-0.120826	0.108156	0.102738	-0.268065	-0.840611	-0.628162	0.381219	0.169577	0.147927	0.392303	0.109474
201158_at	NMT1	0.407532	-0.982378	-0.0704842	0.457083	0.268855	0.85908	0.8995	0.838238	0.892899	-0.00741434	-0.136016	-0.0262365	-0.494714	-0.642729	-0.762729	-0.207628	-0.0330782	-0.219641	0.0907998	0.366403	0.049448	0.00741434	0.710742	-0.263933	-0.416875	-0.28452	0.433921	0.237125	0.507382	-0.00639296	0.930296	0.600531	0.10878	-0.250332	-0.156826	0.00639248	0.0677447	-0.535664	-0.422439	-0.408582	-0.56436	-0.0673695	0.573671	0.287894	0.082808	-0.0632005	0.24425	-0.283072
201159_s_at	NMT1	-0.446288	0.396772	0.341847	0.0420389	-0.050663	0.322248	-0.0302672	0.285206	-0.443106	-0.141028	-0.159013	-0.109438	0.304711	0.0629072	-0.0925951	0.135514	-0.0160446	0.156394	-0.566503	-0.104552	0.0160446	0.0420094	-0.220151	0.00147247	-0.263641	-0.200618	0.0874867	0.350815	0.0842361	-0.0476894	-0.302834	-0.514358	0.369206	0.721661	-0.14368	0.767562	0.229282	-0.0530376	0.0161777	-0.00147247	0.0144844	-0.118868	0.111217	-0.209499	-0.10658	0	-0.12437	0.33954
201160_s_at	YBX3	-0.207472	0.261877	0.088254	-0.0553436	-0.485966	-0.860514	-0.173172	0.104161	-0.277714	0.225473	-0.00453758	-0.0418072	-0.272547	0.306131	0.508705	0.329012	0.222258	-0.185255	0.0304718	-0.127312	0.404882	0.00453758	-0.360029	1.55496	-0.0321274	0.674595	0.861755	0.961072	0.652826	0.0321274	-0.462202	0.59822	-0.238218	0.515303	-0.795621	-1.29315	-0.782684	0.115146	-0.897921	-0.515905	0.0435028	0.969496	-0.775375	-0.590678	0.424685	0.192343	0.101098	-0.104716
201161_s_at	YBX3	-0.37055	-1.9629	-0.418206	-0.205486	-1.31245	-0.103304	0.730858	0.443501	-0.318267	0.313782	0.354716	0.392358	-0.317915	-0.0157118	0.564721	0.0157118	-0.643815	0.0575752	0.608475	0.0207262	0.593396	-0.473891	0.0432711	1.86442	0.247228	0.728265	1.49564	1.58828	0.880782	-0.0119538	0.0119538	0.655436	-0.430578	-0.338867	-0.708682	-0.733383	-0.531819	0.125712	-0.491335	-0.50487	0.0522218	-0.0560784	-1.30256	-0.049274	0.716681	0.784445	0.812424	0.0332046
201162_at	IGFBP7	-0.130575	-1.29819	-0.443809	-0.21356	-0.35464	-0.255502	0.135261	0.139801	0.281992	0.10494	0.0207386	0.110741	-0.0373316	-0.0193462	0.0867662	-0.0184727	-0.21076	0.0368767	-0.0717487	0.161082	0.0718346	0.0184727	-0.144185	0.437443	0.234726	1.42351	1.09713	0.680106	0.626285	0.148275	-1.48985	-0.0670767	0.0711155	-1.13261	-0.0273781	-2.15628	-0.101664	0.344152	0.0176916	-0.0176926	-0.501191	-0.483271	-1.40809	0.0387068	0.34443	0.416154	0.410967	0.0756569
201163_s_at	IGFBP7	-0.105325	0.0216265	0.3953	0.284517	0.1121	0.00766754	0.288261	0.43018	0.477543	-0.0256968	0.195988	-0.0542164	-0.102245	-0.149729	-0.138417	0.000437	-0.000437	-0.347754	-0.453114	0.0872564	-0.143878	-0.0644922	-0.00961876	0.0359173	-0.330179	0.174084	0.495819	0.231356	0.0940123	-0.429413	0.340105	0.330839	0.21411	-0.402408	-0.403821	-1.49255	-0.00667477	-0.251362	-0.348165	-0.479566	-0.210286	0.15671	0.00667572	0.0804491	0.137348	0.276232	0.0496826	0
201164_s_at	PUM1	0.310799	-1.73764	-0.839551	-0.309895	0.149173	0.525517	0.122216	0.437534	-0.0991468	0.292601	-0.136338	-0.264492	-0.188848	-0.20648	-0.205382	-0.453028	0.77142	0.508319	0.94768	0.0991468	0.281196	-0.248142	0.0733233	-0.293455	0.235487	-0.338693	0.281611	0.402946	0.573662	-0.0381393	0.25167	0.376492	-0.561284	-1.10605	0.379032	-1.08087	-0.334427	0.0158463	-0.0158463	-0.0725803	-0.138033	-0.742389	0.137461	0.0938292	0.520154	0.0397034	-0.194811	-0.00950909
201165_s_at	PUM1	0.0655108	-1.93543	0.168756	-0.0524077	-0.00719976	-0.209922	1.43652	0.864574	-0.276437	-0.0173831	-0.378561	0.359726	0.0441599	0.0101709	-0.108573	0.0690145	-0.193254	0.213658	0.202024	-0.370185	-0.0916848	0.00720024	0.766096	-0.624387	0.0326257	-0.578998	0.462101	1.20115	0.991144	-0.881857	0.191784	0.653762	-0.843591	-0.888946	-0.440726	-1.08599	-0.155793	0.195959	0.0304756	0.0100379	-0.0100374	-0.599803	0.354279	-0.41291	0.0112143	-0.399388	0.420906	0.0717721
201166_s_at	PUM1	-0.138251	-0.343661	-0.180279	-0.474615	-0.0842438	-0.104023	0.00689697	0.188351	-0.417072	0.212286	-0.015913	0.173384	0.286211	0.196604	0.209002	0.466017	0.551381	0.114151	-0.0510025	-0.193737	0.0856361	-0.00689697	0.528052	-0.467149	0.282241	-0.539799	-0.154078	-0.0337296	0.346941	-0.936252	0.445497	0.706145	-0.547806	-0.838731	0.0337296	-1.13193	0.315854	0.265719	0.14854	0.222631	0.166459	-0.640891	-1.60506	-0.574169	0.130118	-0.121569	0.120916	0.0880232
201167_x_at	ARHGDIA	0.292737	0.415513	0.28418	-0.0101781	0.264629	-0.0701499	-0.448773	-0.205251	-0.448327	0.366207	0.116225	-0.282482	-0.0035162	0.0314493	-0.0560088	-0.117307	-0.697439	0.102801	-0.0208216	0.503379	0.0035162	0.392518	0.0377855	0.470969	0.187605	0.126842	0.303563	-0.328763	-0.164359	-0.0541482	-0.105897	-0.388557	-0.124883	0.399743	0.714101	0.616164	0.0828428	-0.26664	-0.139001	-0.011343	-0.19594	-0.0111194	0.302943	0.0111194	0.247466	0.0380778	-0.356969	-0.133479
201168_x_at	ARHGDIA	0.499952	-0.226163	-0.408155	-0.364492	0.0408745	1.16719	-0.0692911	-0.366372	-0.124493	0.122237	0.0460453	0.00633049	-0.0520458	-0.00633049	0.0623884	-0.0979013	-1.00513	0.348136	0.428553	0.122097	-0.0351791	0.0201006	-0.145833	0.385215	-0.0963907	0.161373	0.65199	0.452083	0.129398	-0.161552	-0.928934	-1.29181	0.109077	-0.148555	0.0844884	0.378376	-0.212289	-0.0867124	0.0379758	-0.0379758	-0.224336	0.176023	0.304901	-0.208632	0.17699	0.0890741	0.0304966	0
201169_s_at	BHLHE40	-0.251068	0.157403	0.0455651	0.224724	0.309211	0.0081315	-0.377061	-0.109971	0.067956	-0.192625	1.20033	0.104829	-0.293558	-0.0940962	0.607632	-0.170758	-0.284693	-0.119812	-0.430291	0.170351	-0.0081315	0.0197563	-0.00562906	-0.452367	-0.0222597	-0.755772	-0.635255	-0.502534	-0.402428	0.00562906	-0.0398169	-0.421681	-0.520015	0.89034	-0.111641	0.406696	0.211254	1.05964	0.0167346	0.184052	0.570001	0.312043	1.22273	0.0452852	-0.329598	0.9046	-0.205236	-0.404462
201170_s_at	BHLHE40	0.0562325	-0.263614	-2.01069	0.0953798	-0.716552	-0.47712	0.851413	1.42627	1.22605	0.104394	0.972544	0.800871	-0.35508	0.279418	1.72423	-0.591961	-0.20222	0.608296	-0.0562325	-1.1856	-0.144511	-0.967294	0.471518	-0.633561	-0.373219	-1.03515	0.288436	0.348152	0.30681	0.0668688	0.363987	0.566953	-1.50583	0.973361	-0.704135	-1.63029	-0.154322	1.31941	-0.0668688	-0.112083	0.898648	0.608778	-0.885903	-0.5846	-0.0940866	1.00738	0.611358	-0.507594
201171_at	ATP6V0E1	0.229733	2.01495	1.4804	0.419189	-0.92091	0.214875	0.828457	0.986449	-2.10582	-0.484102	-0.285446	-0.539576	0.315458	0.0783997	-0.0783997	0.974041	1.9754	-1.37625	-0.667768	-0.900301	-1.61718	-0.842874	-0.47492	-1.06698	0.0283809	0.931715	1.23226	1.08482	1.29274	-1.45922	0.112386	1.11369	-0.258098	0.535107	0.154716	-0.239905	-0.160476	0.743928	-0.466556	-0.0283809	-0.548768	2.37435	-0.487818	-0.277684	-0.219407	-0.0761433	-0.184682	0.651895
201172_x_at	ATP6V0E1	0.0310574	0.327967	0.0185766	0.397105	-0.189304	0.59556	0.890856	0.509531	-0.0832443	0.196836	0.0204697	-0.580619	-0.291555	-0.478419	-0.565428	-0.124556	-0.0185766	-0.447819	-0.682467	-0.35636	0.0581598	0.0470638	0.304955	0.0088129	0.617984	0.362035	-0.138378	0.716873	0.327272	-0.632826	0.0137615	0.636936	-0.00881386	-0.0402918	-0.0376587	-1.43016	0.384574	-0.147265	-0.172173	-0.193486	-0.059948	0.764113	-0.116233	0.335748	0.163589	0.0737305	-0.535927	-0.249799
201173_x_at	NUDC	0.217357	-0.489129	-0.30004	-0.245683	0.177774	0.362429	0.244802	0.305082	-0.0722752	-0.0607777	0.00707913	-0.23018	-0.311921	-0.354054	-0.124659	-0.414103	0.719773	0.137856	-0.00707913	0.332681	0.279961	0.111975	-0.134534	0.497699	0.0608444	0.230264	0.124826	-0.0881338	0.187778	0.452487	-0.500459	-0.703483	0.654269	-0.234108	0.279694	-0.882863	-0.000234	-0.483934	-0.0747404	-0.298649	-0.214728	0.000234	0.68629	0.390177	-0.0162592	0.101644	-0.138329	-0.2779
201174_s_at	TERF2IP	-0.577138	-0.869591	-0.665642	-0.574797	-1.38999	-0.578759	-0.440451	-0.374815	-0.496834	0.0450172	0.198728	0.448299	0.169043	0.263677	0.0833549	0.18112	1.14254	-0.00671101	-0.0364771	0.00671101	0.190177	0.0671644	0.230397	0.00482178	0.546947	-0.350079	-0.0880804	0.186459	0.0116463	-0.370411	0.383052	0.608857	-0.267719	-0.040844	-0.082469	-1.11642	-0.00419045	0.161586	0.12267	0.00419045	0.0635157	-0.146187	-1.31427	-0.00982571	0	0.281659	0.553061	0.311557
201175_at	TMX2	-0.250892	0.234242	-1.16275	-0.924709	-0.150965	1.08422	1.35256	1.07224	0.232817	0.0986404	0.038621	-0.399715	-0.31922	-0.203652	-0.395587	0.218528	0.246508	0.00734806	-0.00734806	-0.0507402	0.252019	-0.041893	0.897497	-0.0158691	0.654462	-0.222186	0.153066	1.05992	1.10152	0.00773144	-0.296588	0.00964928	-0.541319	0.00294781	-0.0753355	-1.5822	-0.257567	-0.0234623	-0.395401	-0.00294781	0.235772	1.7143	-0.0290508	1.08382	0.142807	0.0130215	-0.453957	-0.380518
201176_s_at	ARCN1	-0.386318	-1.59668	-1.61085	-0.655316	-0.315227	0.676965	0.432122	0.462621	-0.419187	0.0529985	0.0112295	-0.0572786	-0.20183	0.2521	0.0643845	0.126096	-0.264475	0.0864906	0.477109	-0.0147533	0.0652142	-0.0112295	0.579517	-0.438075	0.473563	-0.159407	0.679706	1.03914	0.909632	-0.378433	0.425958	0.580341	-0.436739	-1.06469	-0.737036	-2.15505	-0.135518	0.14926	-0.116907	0.202587	0.116907	-1.00602	-2.48378	0.299734	0.0108318	-0.0129166	0.0173674	-0.199558
201177_s_at	UBA2	-0.340704	0.0429764	-0.512436	-1.00758	-0.643319	-0.915256	0.228069	0.269785	-0.917995	-0.391279	-0.357794	0.219552	0.136033	0.0909843	0.144349	0.314087	0.094655	-0.0429764	0.0617065	-0.1786	-0.206099	0.0763683	0.451374	-0.103332	-0.102372	-0.0473556	0.0473556	0.735643	0.398318	-0.230043	-0.25781	1.05341	-0.208112	-0.336649	0.0643148	-1.72303	-0.376677	0.931386	0.212437	0.211569	0.269916	0.0540237	-2.40504	-0.575001	-0.0565128	0	0.572232	0.372501
201178_at	FBXO7	-0.0288019	0.533151	-0.481149	-0.854425	-0.233312	0.347081	0.351652	0.576223	-0.385047	0.084672	-0.175106	-0.445949	0.216593	0.0415602	-0.0591478	0.0928297	0.119509	-0.311884	-0.462967	0.0642862	-0.153319	0.0288019	0.515939	0.625495	-0.0320482	-0.533227	-0.93666	0.34549	0.291814	-0.939956	-0.114976	-0.221892	-0.114038	0.440799	0.107614	-0.502854	0.0144968	0.203961	0.197633	-0.0144968	-0.205005	-0.297782	0.369943	0.225947	0	-0.261193	-0.402128	0.205844
201179_s_at	GNAI3	-0.0149021	-0.674171	0.0883741	-0.390129	-0.447068	-0.531966	1.28374	0.998351	-1.32595	-0.474377	0.266446	0.0313826	-0.101639	-0.154037	0.0831733	0.099648	0.489117	-0.279459	0.0783348	0.392003	-0.350127	0.0149021	0.231337	0.153498	-0.0381627	0.0787945	0.918462	1.51849	1.12996	-0.303229	-0.389787	0.852633	-0.0243502	-0.144193	-0.364151	-1.11953	-1.17418	0.363566	0.515131	-0.00622129	0.206116	0.00622129	-0.0483661	-0.562574	-0.360066	0.336951	0.505913	0.146874
201180_s_at	GNAI3	0.0216446	-0.100834	0.000362	-0.272968	-0.643652	-0.187252	0.491892	0.191822	-0.744565	-0.066515	-0.278254	0.233478	0.133089	0.176525	0.256748	0.234408	0.0598049	-0.271503	-0.000362	-0.0422745	-0.14603	0.158173	0.0968971	0.0245075	0.255914	-0.765852	0.327539	0.59987	0.0293322	-0.788179	0.865936	1.06312	-0.289311	-0.522926	-0.430616	-1.83704	-0.237045	-0.0245075	0.0397329	0.0958633	0.210187	-0.0739298	-1.83959	-0.619526	-0.0594673	-0.304839	0.263696	0.155244
201181_at	GNAI3	-0.529208	-0.163999	0.117316	-0.280988	-1.0463	-0.969218	0.609642	0.139956	-1.04137	-0.306633	-0.110195	0.243211	-0.504022	0.291566	0.243754	0.466453	0.766311	0.0560904	-0.0138178	-0.769179	0.465463	0.0138178	0.182693	0.279299	0.574232	-0.50689	0.229778	0.588849	0.101642	-0.77734	0.803089	1.16371	-1.06348	-0.101642	-0.284869	-1.11189	-0.482425	0.375842	-0.180869	0.46197	0.322368	-1.3506	-1.17589	-0.125271	-0.0585041	0	0.51197	-0.171597
201182_s_at	CHD4	-0.100173	-0.789484	-0.285051	-0.0268011	0.323749	-0.65517	-0.57821	-0.311796	-0.932788	0.280202	0.223486	0.313884	0.405075	0.0268011	0.41186	-1.1883	-0.347888	0.494692	0.509565	-0.393874	0.492636	0.0433416	0.0380626	-0.12464	0.504196	0.846883	-0.274767	0.0378246	0.0357065	-0.913195	-0.900454	-0.84974	0.158551	0.531069	-0.0602179	-0.343864	-0.035707	-0.880895	0.480915	0.0630751	0.586493	-1.08967	0.185658	-0.36957	0.318308	0.193737	0.228342	0.331104
201183_s_at	CHD4	0.0480514	-1.21614	0.47066	-0.00490761	-0.0493588	-0.330964	1.46811	1.58423	0.0940061	0.364377	0.00490713	-0.0799909	0.126117	0.0582685	-0.0899921	-1.38184	0.054708	-0.236249	-0.419763	-0.559536	0.332399	-0.382198	0.391091	-0.347506	0.229546	0.0463572	0.846333	1.2527	1.10549	-0.0463572	0.343963	0.176439	-0.436247	0.145189	-0.184694	-0.600508	-0.327179	-1.23685	-0.254179	-0.269163	-0.200114	-1.00086	0.673433	0.376455	0.515381	0	0.0404696	0.253637
201184_s_at	CHD4	0.143059	0.262904	0.388357	0.101651	0.105572	-0.0630188	-0.611733	-0.60462	-0.0699701	0.099062	-0.00111771	-0.114781	0.0337601	0.205622	0.21454	-0.120387	-0.362647	0.0981665	0.00111771	-0.276308	-0.072423	-0.209719	-0.0976276	0.336781	0.267592	0.32653	0.254808	-0.511385	-0.320703	-0.293714	-0.273244	-0.456541	-0.489788	0.551897	0.195348	0.553158	0.0537262	-0.0273094	0.0273094	-0.0763626	-0.228107	-0.254708	0.23781	0.184002	0.146974	0.0913544	-0.265401	0
201185_at	HTRA1	-2.78236	-1.29027	-3.17305	-0.69974	-3.11634	-0.464661	-1.81891	-1.11052	-0.375824	0.280433	-0.203827	0.397308	0.167887	0.456008	0.18325	0.106542	0.639818	0.115437	0.33497	-0.106542	0.209905	0.236255	0.0110722	-0.653516	-0.188153	-0.168211	0.0141439	0.50303	0.151443	0.0219879	-0.416998	-0.324772	0.511494	-0.666319	-0.482488	-1.0853	-0.66268	0.375051	0.103079	0.0669107	0.590788	-2.33402	-0.0110722	0.443486	0.577956	0	0.625292	0.499362
201186_at	LRPAP1	0.150495	-0.0538807	-0.966633	-0.465172	-0.0702085	0.464233	-0.0168533	-1.69469	-0.135929	0.0168533	-0.201929	0.178071	0.238194	-0.0569649	0.0635509	-0.35832	-0.551491	0.0381813	0.157266	0.125999	0.148056	0.0550995	-0.180048	0.0723524	0.110198	-0.324107	-0.307693	-0.152201	-1.57071	-0.595626	-0.163491	-0.939497	-0.0665903	0.276384	0.714249	-0.40166	0.0665903	0.368949	0.365634	0.245209	0.280332	-0.578986	0.902741	0.592	-0.0624428	-0.35209	0.0739469	0.143474
201187_s_at	ITPR3	-0.212406	0.510016	0.213777	0.0138855	0.295475	0.104348	-0.525662	-0.451476	-0.0593939	-0.0316544	0.0567675	-0.129322	0.113297	-0.303781	-0.203933	-0.0829821	-0.0978437	0.0868978	-0.0138855	0.0420909	0.0416751	0.0788322	-0.307734	-0.0308867	-0.501444	-0.10063	0.00783253	-0.397526	-0.3143	-0.0749545	0.0826163	-0.418378	0.49108	0.573062	0.550008	0.635142	0.0777164	-0.00783205	-0.0685663	-0.0701027	0.010994	0.109935	0.226915	0.172359	-0.244528	-0.0202212	-0.224914	0.0152874
201188_s_at	ITPR3	0.0288887	0.504252	-0.471096	-0.352226	0.196124	-0.103111	0.649554	0.285482	0.142145	-0.294818	-0.0687008	-0.0623817	-0.108066	-0.116451	0.0057373	-0.0751953	-0.34156	-0.0057373	0.318841	0.415296	0.241952	0.0604515	-0.346018	0.188714	0.132111	0.180363	0.805006	0.815032	0.0246181	0.0730109	0.0983267	-0.0416999	-0.0169125	0.098855	0.221804	-0.133906	-0.607443	-0.426569	0.0169125	-0.185973	-0.26581	-0.176504	-0.385559	-0.217629	-0.207609	0	-0.0140681	0
201189_s_at	ITPR3	0.226894	0.401887	0.789679	0.731848	-0.0182705	-0.490229	0.00659084	-0.387416	0.630179	-0.171436	0.0724978	-0.00659037	-0.226265	0.528364	0.284484	-0.154102	-1.16939	0.0980916	0.431324	-0.362057	-0.568565	-0.302919	-0.433774	1.26571	1.03866	1.17219	1.45728	0.364665	0.0674233	0.615705	-0.339018	0.321636	-0.381991	0.754116	-0.198152	0.0116305	-0.600335	-0.0589867	-0.0130534	-0.0116301	-0.0975184	0.873335	-0.504577	-0.361128	0	0.266661	0.191314	-0.0119615
201190_s_at	PITPNA	-0.0779753	-0.679808	0.00238705	-0.0682173	-0.451993	-0.597181	-0.539392	-0.621653	0.0776234	0.0644102	0.20599	-0.00238705	0.0861425	0.445368	0.185102	0.435251	-0.163781	0.0726385	0.515684	0.0473318	-0.0669336	-0.13292	0.21556	0.250929	0.221172	0.0550699	-0.109754	0.166293	-0.159566	-0.0631103	0.0489578	0.0613728	0.0111961	-0.0376825	-0.0719271	-0.874734	-0.0735598	0.217679	-0.228951	-0.0548353	-0.0111961	-0.0911789	0.0311327	0.277375	0.221897	0.316429	0.124695	0.213844
201191_at	PITPNA	-0.328119	-1.58416	-1.75998	-0.217423	-0.60667	0.757323	0.695737	0.606935	0.0279427	0.0723128	-0.00346899	-0.130994	-0.215858	0.143666	-0.127261	0.144013	0.0527105	-0.0761094	0.672429	0.00346851	0.337909	-0.311797	0.747772	-0.187734	0.523586	-0.623499	0.218908	1.15747	0.856045	0.183994	-0.577748	0.443438	-0.330167	-0.981856	-0.366093	-1.40941	-0.150442	0.0220494	-0.514666	0.148001	0.118016	-0.0220494	-1.2232	0.397558	0.361006	0.0641561	0.00532865	0.00269937
201192_s_at	PITPNA	0.177843	-0.124787	0.187963	0.469419	-0.117859	-0.336522	-0.0175905	-0.228306	-0.135617	0.0840759	0.01759	-0.14493	-0.114169	-0.104128	0.0190659	-0.0240936	-0.113304	0.237538	0.274073	0.534241	0.286066	0.282745	0.00968313	0.509458	0.538721	1.11112	-0.643055	0.143059	-0.538564	0.261081	-0.52922	-0.0210023	0.374219	0.0702124	0.0346499	-0.40869	0.284316	-0.00968313	-0.162216	-0.39844	-0.143028	0.0346098	-0.441037	-0.0117078	0.105932	0.0601807	-0.137213	-0.136176
201193_at	IDH1	0.599552	0.0869999	-1.58347	-0.94014	0.605224	0.896976	0.772268	1.0684	-0.645002	0.397617	-0.888028	-0.147863	0.028347	-0.311153	-0.295893	-0.166625	0.544099	0.18465	-0.796455	-0.028347	0.0943928	-0.0816412	-0.0893869	-0.482115	-0.23473	-1.54184	-1.47283	0.491178	0.835977	-1.93356	0.00736999	0.0392437	1.11575	-0.859342	1.00389	-1.21956	0.39405	0.81116	0.383914	0.880844	-0.00736999	-1.67364	-1.28201	0.106846	0.332933	-0.984222	-0.277587	0.00963306
201194_at	SEPW1	-0.055234	0.00795078	-0.746225	-0.00795078	-0.443269	0.553004	0.349499	0.390799	0.414186	0.0995913	0.109813	-0.13849	-0.759657	-0.567372	-0.420714	-0.620785	-2.00899	0.336101	1.17286	1.08999	-0.0101137	0.216571	0.031085	0.0905237	0.0965595	1.05898	-0.145785	0.467199	0.120193	0.445045	-0.41294	-0.0485296	1.05582	0.27493	0.647449	-1.27518	-0.277041	-0.404134	-0.357601	-0.353727	-0.20914	0.961935	-0.351675	-0.031085	0.561363	0.589443	0.250763	-0.329429
201195_s_at	SLC7A5	-0.236125	0.435409	1.13385	0.149725	-0.928844	0.177475	-0.702846	0.0351582	0.119805	-0.261877	0.55316	-0.0351586	-0.46882	1.09403	1.56857	0.597592	-0.607805	0.355802	-0.292457	-0.0501256	-0.464798	-0.0938797	-0.106004	0.0510869	-0.489511	0.435099	0.686124	-1.27158	-0.304873	-0.215195	-1.15732	-0.783945	-0.8288	0.758007	-0.79306	-0.0510869	0.512657	0.440749	0.369805	1.11649	2.1196	0.96617	-0.23409	0.407846	-1.07574	0.000841	-0.488083	-1.27972
201196_s_at	AMD1	0.453812	-0.656665	-0.362049	-0.192148	0.13545	-0.0379467	-0.0265388	0.0224094	0.212031	-0.18017	0.120943	-0.244251	0.109554	-0.132576	0.445028	0.279152	0.304285	0.0540714	-0.326498	-0.101868	-0.0224094	0.239597	0.809934	-0.0171957	0.383287	-0.953403	-1.48654	-0.20522	-0.501963	-0.389482	-0.209697	0.394568	0.0171957	-0.416478	-0.182795	-1.44327	0.378289	0.724635	0.615108	0.0944719	0.667803	0.746717	-1.07111	0.257605	-0.533324	-0.225224	-0.568713	-0.072154
201197_at	AMD1	-0.394091	0.0489483	-0.0252056	-0.446278	-0.118125	0.139114	0.618925	0.711111	0.447557	-1.05944	-0.168993	-0.253697	-0.663488	-1.03774	0.415689	-0.111267	0.969626	0.747015	0.196651	-0.170585	0.0252056	0.198387	0.195389	-0.44542	-0.0558214	-2.00964	-0.060257	-0.0173721	0.0692539	-0.156044	0.228428	0.866674	0.53227	-0.0804663	-0.283654	-2.17572	0.363322	0.175515	-0.119036	0.0173721	1.18369	1.05183	-1.38021	0.4035	-1.3248	-0.464252	-0.537515	-0.78236
201198_s_at	PSMD1	0.025362	-2.36923	-1.60429	-0.298592	-0.718736	-0.481322	0.508782	0.000348	-0.284741	0.358907	-0.000348	0.4229	0.24404	0.99831	0.245108	-0.637286	0.761063	-0.385097	0.00673389	-0.529803	0.0927706	-0.391796	0.688901	-0.17169	1.89607	-0.0496654	-0.128402	1.24229	0.826053	-0.141183	-0.259087	0.427366	-0.422776	-0.951828	-0.355025	-1.47398	0.460216	0.0496654	0.363438	0.618603	1.05499	-1.3918	-0.466933	0.92161	0.333204	0	0.388628	0.189571
201199_s_at	PSMD1	-0.0394793	-1.04594	-0.617111	-0.899543	-0.0375481	-0.0984535	-0.150943	-0.858239	-0.190914	0.0937014	0.179336	0.293348	0.27846	0.0375481	-0.127918	-0.300726	0.167532	0.317536	0.647018	0.554993	0.142834	0.666423	0.479888	-0.00304317	-0.0795574	0.0802126	0.238764	0.410017	0.0208092	-0.298302	0.00304317	0.467323	-0.582196	-0.0289764	0.029685	-0.423217	-0.158255	0.108557	0.563499	-0.0792379	-0.397417	-0.152985	0.370645	-0.387162	0.215518	0.363214	0.520092	0.52993
201200_at	CREG1	0.304103	-1.20761	-1.13253	-0.488965	0.585384	0.508024	0.794477	0.543066	-0.072628	0.0101404	-0.0569744	-0.151063	0.0357122	-0.329895	-0.099452	0.101974	0.529974	-0.209708	-0.0101404	-0.143012	0.341777	0.178054	0.0411177	-0.357729	0.0836182	-0.923264	0.243424	0.345614	0.527536	-1.22456	-0.00388813	0.00370884	-0.396878	-1.94533	-0.00370979	-2.17834	-0.200129	0.272181	0.0374279	0.160651	0.242223	-0.535517	-2.58846	0.490381	0.0032711	-0.0869904	-0.190647	0
201201_at	CSTB	0.0748901	-0.233749	-0.749793	0.352753	-0.189928	0.0713367	-0.19735	0.1602	0.681725	-0.486275	0.073122	-1.07634	-0.801501	-1.04947	-0.566584	-0.751651	-0.0713367	0.204688	0.570479	0.927088	0.300591	0.249521	0.285734	0.920565	0.300259	0.667756	0.328793	0.258768	0.283628	0.429573	-0.0680046	0.0680046	-0.296867	-1.01965	-0.326799	-1.55373	-0.977348	-1.13385	-0.475519	-0.745277	-0.582801	0.676708	-0.989254	0.322207	0.278758	0.983816	-0.352815	-0.269341
201202_at	PCNA	0.00965023	-1.3338	-0.277781	0.115067	0.24134	-0.413901	1.07853	0.458773	0.328235	-0.0332775	-0.00965023	-0.259424	-0.0160227	0.0122633	-0.361391	0.162266	0.708951	0.0759115	0.340416	-0.06423	-0.212625	-0.15261	0.337364	0.218709	0.00525093	0.405875	-0.67739	0.79245	0.267336	0.322878	-0.00414181	1.0568	-0.341504	-1.03459	-0.0647011	-2.03109	-0.613374	-0.0732307	-0.116037	0.00414181	-0.488011	0.0168581	-2.65443	0.687609	-0.0444088	0.0477037	-0.12129	0.0920639
201203_s_at	RRBP1	-0.124227	-0.0852447	0.642958	-0.21524	0.145115	0.11411	0.540536	1.06713	-0.118702	-0.380889	0.145823	-0.0681658	0.0600424	-0.00542116	0.0534396	-0.0205383	-0.330763	-0.00156736	-0.124301	0.0527377	0.359787	0.00156736	-0.325563	-0.189558	-0.346465	-0.378963	0.854594	0.260543	0.201618	-0.0490799	0.0167823	-0.106097	-0.584445	0.327728	0.146326	0.168245	-0.0483499	-0.35675	-0.112888	0.156776	0.154016	-0.0167823	0.390515	0.480372	-0.362572	0.0725794	-0.0473013	-0.00581932
201204_s_at	RRBP1	0.036561	-0.0845838	0.109783	-0.446917	0.610663	0.847741	0.502689	0.201935	1.26968	-0.036561	0.976283	-0.333995	-0.111477	-0.168454	-0.345143	-0.845881	-0.217512	-0.0500922	0.0849843	0.0931759	-0.0944066	0.0651207	0.395475	-0.264876	-0.00197172	1.40834	1.48618	0.964975	0.812884	1.52977	-0.148191	-0.459851	-0.105615	0.417765	-0.293758	0.4709	-0.124016	-0.614898	-0.0918045	-0.393421	0.00197172	-0.309881	1.20507	1.8064	0.132161	1.17295	-0.161297	-0.0604515
201206_s_at	RRBP1	-0.31962	-1.31808	0.698067	-0.391715	0.509024	-0.3434	1.24906	0.985724	0.435804	-0.601989	0.193665	0.2375	0.0024662	-0.313153	-0.0024662	-1.00323	-0.567099	0.143062	0.393208	-0.113618	0.160627	-0.31186	-0.0246429	-0.482272	-1.0367	1.61756	1.86428	1.47298	1.28465	0.42693	-0.370295	-0.509755	0.257209	0.130453	0.0246429	-0.0612621	-0.485294	-0.672943	0.499989	-0.528226	-0.258601	-0.306283	1.28729	1.51387	-0.296448	0.222956	0.263488	0.0403981
201207_at	TNFAIP1	0.036437	-0.658469	-0.647534	-1.14174	-0.122648	-0.0735435	1.16351	0.546123	-0.443926	-0.036437	0.0746307	0.281405	0.166105	0.443477	0.707299	0.213278	0.182884	-0.17752	0.701035	-0.791274	-0.227335	-0.605598	0.564816	-0.320942	0.101655	-0.992243	0.312269	1.21749	0.365401	-0.650815	0.0366573	0.317051	-0.59908	-0.367517	-0.669519	-1.17146	-0.464039	0.224394	0.23399	-0.0366573	0.224668	0.368898	-0.583496	-0.361635	-0.022398	0.00362015	0.153533	0.0312042
201208_s_at	TNFAIP1	0.389225	-0.413722	0.286374	-0.0799656	-0.293071	0.363792	0.0528731	-0.369601	0.630179	0.284904	0.0984712	0.327074	0.126658	-0.0350447	0.504007	-0.243644	-0.502158	0.0350447	-0.181242	-0.845784	-0.297034	-0.369854	-0.235679	-0.114279	-0.386879	0.0845814	-0.534312	0.370482	-0.280913	-0.0377946	0.0377946	-0.685692	-0.291858	0.468306	-0.0943589	0.370047	-0.423179	0.132523	0.456559	-0.320879	0.0640225	0.119892	0.893654	0.258533	0.229125	0.040904	0.251947	-0.0679851
201209_at	HDAC1	-0.256239	-0.18548	-0.300465	-0.127018	-0.301151	-0.469141	-0.787447	-0.781152	-0.00452995	-0.0509329	0.00452995	0.160809	-0.071722	0.276722	0.343586	0.267712	0.215824	0.344652	0.560394	0.446156	0.120747	0.147461	0.0765085	0.210024	0.0891828	0.354013	0.42498	-0.622453	-0.323167	0.334017	-0.12125	0.430562	-0.574762	-0.331089	-0.0304317	-1.55224	-0.611635	0.034749	-0.237781	0.0304317	-0.0897703	0.78468	-1.50628	0.245342	0.0136719	0	0.117423	-0.019928
201210_at	DDX3X	-0.167824	0.0907316	-0.332349	-0.730525	0.0149155	0.563881	0.543554	1.10511	-0.273208	0.216241	-0.60444	0.0329189	-0.607551	-0.368703	0.636259	-0.0149155	1.214	-0.233263	0.439377	-0.987047	0.0957489	-0.362525	0.0470123	-0.855336	0.0407534	-1.29125	0.435115	0.141832	0.489163	-1.1163	0.112413	0.61096	-0.816149	-0.119136	-0.376097	-2.30591	0.0800791	0.1881	-0.2547	-0.249125	0.565806	-0.0407534	0.065732	-0.504103	0.0765858	-0.704493	-0.0347042	-0.762971
201211_s_at	DDX3X	0.0357165	0.336547	0.366114	-0.220499	0.114727	-0.027925	0.169246	-0.00867319	-0.0681849	-0.110909	-0.084043	-0.0262756	0.0315404	-0.305374	0.0377164	-0.00498724	0.12133	0.198037	-0.0871062	0.117977	0.00498724	-0.105179	0.231431	-0.088531	-0.119412	0.146618	-0.486343	-0.307753	0.00253153	-0.236352	0.0411658	-0.028645	0.508982	0.172836	0.222319	0.118957	-0.043879	-0.00253153	0.107245	-0.137328	0.0237913	-0.0529284	0.131504	-0.0519018	-0.0380144	-0.149014	0.0636482	-0.0432978
201212_at	LGMN	1.26624	-0.219755	-1.82239	-0.710107	1.50024	1.18085	0.871502	0.414192	0.176711	-0.28157	-1.11581	-0.479843	-0.446056	-1.04004	-0.277655	-0.0199356	-0.321043	0.447535	0.293574	0.176312	0.460545	0.0199356	0.404953	0.576494	0.282154	-1.29468	-1.2204	0.402351	0.0345011	-1.74667	0.191851	0.643455	-0.0773191	0.192306	-0.0646248	-1.46713	0.641501	0.313058	-0.37296	0.0567875	-0.0345011	-2.77922	-1.54023	-0.187242	-0.267628	-1.15647	-0.578406	-0.496008
201213_at	PPP1R7	-0.162287	0.433521	0.330575	0.306439	-0.0429521	-0.0134935	-0.00896835	-0.355983	0.269916	-0.146699	-0.0901675	-0.0784245	0.157297	0.529657	0.248974	-0.223719	-0.445424	0.290324	0.00896835	0.0617166	-0.288804	0.0492001	0.0443096	-0.0212121	0.331081	-0.134549	-0.812255	0.0387621	-0.330352	0.221511	0.315635	-0.254664	-0.222136	0.0294461	0.422558	-0.486221	0.251352	-0.0800777	0.0958576	0.063271	0.0212121	-0.0556006	-0.126147	-0.428855	-0.00597429	-0.109168	0.0354466	0.0869789
201214_s_at	PPP1R7	-0.0216732	-1.21657	-0.843171	0.0142908	0.138049	0.022646	-0.415669	-0.325747	-0.0651884	-0.189109	0.0547199	0.084877	-0.0499144	0.0790234	0.157403	-0.544355	-0.133505	-0.0142908	0.02775	0.520415	0.731888	0.692133	0.357075	0.238912	0.423723	0.250842	-0.26875	-0.241659	-0.257457	0.402822	-0.321616	0.0255861	0.118303	-1.3721	0.00667	-1.6183	0.0228891	-0.274685	-0.278858	0.258107	-0.00667	-0.390257	-0.969013	0.851466	-0.146168	0.075923	0.15844	-0.0206919
201215_at	PLS3	-0.956519	-0.860429	-1.03765	-1.3217	-0.744318	-0.517475	0.468946	0.117476	-1.40256	-0.204501	-0.195912	0.283795	0.0349722	0.442261	0.277146	0.400099	0.337814	0.000572	0.272422	-0.000572	-0.0282774	0.15056	0.369131	-0.786113	-0.142463	-0.708153	0.289073	1.50331	0.392275	-1.33636	0.379195	0.409699	-0.742126	-0.433079	-0.911198	-2.03445	-0.100244	0.212675	0.100244	0.279218	0.196951	0.578198	-0.857376	-0.837191	0	0.0350046	0.522721	0.285482
201216_at	ERP29	0.441785	-1.36228	-0.573209	0.438227	0.413632	-0.120884	-0.00663757	0.0709105	0.0287752	-0.22151	-0.0958099	0.0210314	-0.163214	-0.747204	-0.549056	-0.785861	-0.979208	0.237598	0.00663757	0.752875	0.134128	0.0295744	0.357566	0.145823	0.222448	0.310284	0.128303	-0.103348	0.0697537	-0.405931	0.0617247	-0.54868	0.563022	-0.00497246	-0.47193	-1.36327	-0.243612	-0.642103	0.00497246	-0.313129	-0.317714	-0.414273	0.332936	0.340844	-0.18369	-0.125537	0.0683832	-0.116316
201218_at	CTBP2	-0.312945	0.178685	-0.548443	-1.34388	-0.858791	-0.590616	0.459804	0.137854	-0.583596	-0.113636	0.0372572	0.253673	0.309307	0.302652	-0.00373077	0.400929	-0.146991	0.00373077	0.465236	-0.00934887	-0.443499	0.218155	-0.425127	0.18268	-0.415103	-0.296296	-0.00302792	1.01186	0.371816	-0.321587	0.633824	1.11146	-0.39755	-0.373375	-0.281363	-1.81816	0.146725	0.000812	0.173687	0.144299	-0.000812	0.896841	-1.8856	0.0415163	0.0836487	0.284861	0.430641	0.504908
201219_at	CTBP2	0.00282478	0.0107813	-0.270068	-1.10775	-0.890464	-1.1073	-0.00282478	-0.460442	-0.323534	0.0621233	0.0405979	0.252875	0.410635	0.174852	0.283467	0.386682	-0.026021	0.202185	0.188393	-0.273123	-0.450448	-0.16561	-0.384708	0.417312	-0.631799	-0.520885	-0.120597	-0.0213099	-0.0975261	-0.776255	0.138328	0.292652	-0.12015	0.32524	0.289728	-0.793528	0.0510263	0.517455	0.446196	0.183058	0.00290155	0.750722	-1.23394	-0.00290203	0.101762	0.0190372	0.390554	0.40593
201220_x_at	CTBP2	0.116487	-0.350467	-0.170615	-1.14179	-0.732537	-0.206801	-0.117827	-0.293562	-0.771845	0.0288982	-0.00334644	0.234486	0.031251	0.12119	0.138019	0.00334644	-0.281145	0.0711575	0.030489	-0.309532	0.0851603	0.0859518	-0.979741	0.791933	0.104066	-0.125099	0.245505	0.0805063	-0.0303001	-0.838664	-0.254666	-0.184928	0.230953	0.354565	0.0180073	-0.864076	-0.0101986	0.12075	0.490793	-0.125923	0.0101986	0.346342	-0.0170736	-0.391958	0.0432987	0.0715866	0.196161	0.0399189
201221_s_at	SNRNP70	0.553877	0.171653	0.142569	-0.136981	0.616195	-0.660726	-1.46301	-0.844553	0.459168	-0.161705	0.182261	-0.432308	-0.20657	-0.421491	-0.534301	-0.391376	-0.0880241	0.349217	0.172649	0.639272	0.522986	0.0880241	0.240653	0.415503	0.101927	0.0735369	-0.00766754	-0.813998	-0.992409	0.0828314	0.367234	-0.302546	0.410856	1.10145	0.00766754	0.0673618	-0.511955	-0.676264	-0.752053	-0.736126	-0.388231	-0.569737	0.580597	-0.119359	-0.044795	0.435102	-0.424618	-0.0271254
201222_s_at	RAD23B	0.39155	-1.03716	-0.825643	-0.418804	0.407465	0.583503	0.751057	0.838729	-0.262422	0.196338	-0.00243378	-0.321823	-0.290039	-0.267175	-0.524482	-0.0386476	1.95256	-0.339173	0.00243378	0.620076	0.124299	0.826963	0.653925	-0.168097	0.845701	-0.727417	-0.913644	0.870494	0.938254	-0.367238	1.72575	1.45269	0.704965	-0.734965	-0.15125	-1.42387	-0.293524	0.0711508	-0.174044	-0.0711513	0.457619	0.0714331	-0.262977	0.628636	0.340022	-0.0127411	-0.0685873	-0.120155
201223_s_at	RAD23B	-0.584654	-0.503795	-1.20224	-0.845665	-0.173784	-0.123099	0.0109015	-0.0109015	-0.0594587	-0.262909	-0.230231	0.0745115	0.0329247	0.0293493	-0.200016	0.179829	1.00477	0.350448	0.490739	0.501785	0.186052	0.479528	0.0839844	-0.536945	-0.000154	-0.560297	0.000154	0.312504	0.213415	-0.0263147	0.610121	0.631697	0.272018	-0.550293	-0.376274	-1.45525	-0.5971	0.0854034	-0.407295	0.0786428	-0.0561256	0.128452	-1.05114	0.159283	0	-0.121582	0.282502	0.137028
201224_s_at	SRRM1	0.024395	-0.465968	0.370702	-0.0854392	-0.263063	0.0878868	-0.024395	-0.550245	0.355301	0.524596	0.936124	0.411818	0.194331	0.390851	0.328677	-0.0433064	-0.370952	-0.105103	-0.519327	-0.396951	0.403415	-0.0808182	-0.432114	-0.0332994	0.393173	0.078578	0.0332994	0.0981493	-0.312682	0.407932	-0.218959	-0.84991	0.278887	-0.157647	-0.174431	0.789982	-0.201482	-0.615769	0.640857	-0.100065	0.152724	-0.0594397	0.294303	0.271771	0.0454502	0.568889	0.133852	-0.14423
201225_s_at	SRRM1	0.10283	0.743681	0.616147	-0.0209112	-0.54249	0.947462	0.742352	0.347961	0.694941	-0.023592	0.0584059	-0.298997	-0.303146	-0.000355	-0.496397	0.324464	0.245749	-0.0655098	0.000355	-0.629576	-0.528686	-0.397934	-0.00723553	-0.657566	0.0765715	-0.669218	0.321641	0.551928	0.325482	0.00723553	1.84061	2.12872	-0.538909	0.157407	-0.585967	-1.24247	-0.313547	-0.0658598	-1.13531	-0.353904	-0.423592	1.07401	0.564022	0.0334492	0.0442123	0	-0.168552	-0.285916
201226_at	NDUFB8	0.200154	-0.184717	-0.665745	0.00931263	0.408631	0.823565	-0.318411	-0.524945	0.861906	0.102348	0.154201	-0.382092	-0.591186	-0.75022	-0.566663	-0.534516	-0.00931263	0.292828	-0.0665531	0.600943	0.282917	0.223207	0.452142	0.0558128	0.586942	0.0246639	-1.02414	-0.677292	-0.508428	0.347079	-0.59626	-0.851755	0.57809	0.167093	0.5267	-0.895123	0.407114	-0.128047	0.0874586	-0.277883	-0.0735016	-0.0715485	-0.0246639	1.36691	-0.0716238	0.0563955	-0.623709	-0.732615
201227_s_at	NDUFB8	0.139831	0.457826	-0.518526	-0.260489	0.0862007	-0.211841	-1.13498	-1.38493	-0.15678	-0.00673675	0.315315	0.00673675	0.0274715	-0.0617743	-0.0652828	0.0777407	-0.0739317	0.056181	-0.156292	0.211117	0.0897589	0.162714	-0.245728	0.00668812	-0.00668812	-0.107071	-0.932776	-1.38203	-0.92404	-0.732154	-1.00947	-1.10588	0.293544	0.349492	0.489234	-0.830875	0.211358	0.185263	0.0887938	0.0799332	-0.0702229	0.312278	0.418296	0.0713215	-0.0422316	0.191584	-0.0260353	-0.0167751
201228_s_at	ARIH2	-0.190596	0.128338	0.904107	-0.066349	0.0941734	-0.292856	-0.00230503	-0.24074	-0.154041	0.103015	-0.173837	0.0659194	0.075386	-0.0737748	0.0891328	0.00230503	0.125584	0.0537295	-0.467105	-0.188711	-0.060039	0.171709	0.251589	-0.0625396	-0.175573	0.0200334	-0.25857	0.220742	-0.0357914	-0.204489	0.182005	-0.0380659	0.0245819	-0.0355163	0.355664	0.629932	0.113231	-0.159398	0.0538263	-0.0200334	0.206141	-0.223573	0.760638	-0.294486	0.061245	-0.296305	-0.11812	0.0210881
201229_s_at	ARIH2	-0.034492	-0.740688	-0.333524	-0.703303	0.0802937	0.249664	1.15189	0.979063	0.35935	0.067441	-0.0113831	-0.138894	-0.128922	-0.356503	-0.111121	-0.567322	0.203893	-0.0656905	0.505756	0.0113831	0.399149	0.0577717	0.188555	-0.0905485	0.252718	-0.569893	0.437789	1.22077	0.958086	0.669607	-0.427	-0.00464344	-0.574126	-0.640836	-0.078783	-0.181481	0.107595	-0.547594	0.200758	-0.0983386	0.00464344	-0.429847	0.111953	0.680325	0.117279	0	-0.00262165	0.000366
201230_s_at	ARIH2	-0.241715	-0.368609	-0.649477	-0.242671	-0.813312	-0.3111	-0.218675	0.118358	-0.411809	0.00483894	-0.117956	0.503825	0.167433	0.663836	0.159691	0.11812	0.529071	0.255014	0.38983	-0.00483894	-0.0235691	0.0688486	0.175641	-0.616689	-0.0722342	-0.481328	-0.132561	0.175085	0.139057	-0.105686	0.0674477	0.254068	-0.484217	-0.214071	-0.0674477	-1.03075	0.0730658	0.20403	0.0775843	0.4819	0.0986309	-0.208625	-1.57213	0.0859432	0	-0.100954	0.60388	0.176456
201231_s_at	ENO1	0.308394	-1.90689	-0.943416	0.22683	0.470298	1.28197	1.82176	1.20726	1.08642	-0.198536	-0.0216923	-0.901657	-0.87859	-0.680261	-0.595822	-1.12709	-1.35776	0.122581	-0.32093	0.353165	0.241284	0.0216923	0.631592	0.0677986	1.05695	0.029213	0.0428286	1.30675	0.789364	0.53725	0.0486593	0.288191	-0.107473	-1.28474	-0.646315	-2.085	-0.277365	-1.07174	-0.554636	-0.235322	-0.029213	-1.18422	-0.980403	0.57454	-0.0223923	0.128832	-0.6913	-0.745934
201232_s_at	PSMD13	0.170234	-0.394712	-0.416641	0.142726	-0.128516	-0.390095	0.948724	1.23164	0.00256824	0.696479	0.112231	-0.0291929	-0.568654	-0.0420532	-0.586182	-0.489279	0.0467224	-0.110476	0.0974655	0.00598621	0.182632	-0.00256824	0.526728	0.345821	0.253208	0.0113611	-0.46061	0.476619	0.688272	0.0160274	-0.190881	-0.133403	0.304564	0.519482	-0.0113611	-0.267706	-0.0670376	-0.434691	-0.555648	-0.630643	-0.599369	-0.689381	0.753706	0.202287	0.685193	0.1581	-0.0650797	-0.503794
201233_at	PSMD13	0.047534	0.125756	-0.518923	-0.102128	-0.0341215	0.0136118	1.01173	0.890353	-0.0742388	0.589763	0.109719	-0.0136113	-0.663359	-0.159749	-0.278918	-0.24491	-0.159017	0.0383491	-0.0717115	0.094646	0.367556	0.154613	0.94424	0.315224	0.577949	0.110788	-1.04747	1.02142	0.762163	0.387969	-0.307175	0.475062	0.542037	-0.384479	0.0119071	-0.626065	-0.0119071	-0.165589	-0.33517	-0.479423	-0.216037	-0.717295	-0.092258	0.401751	0.617178	0.243679	0.0798392	-0.51624
201234_at	ILK	0.129024	-1.47693	-1.10723	-1.01895	0.0463409	0.635664	0.499817	0.394643	0.0610533	-0.111259	-0.119849	-0.288909	-0.428598	-0.343419	-0.0463409	-0.374852	-1.30412	0.363257	0.851788	0.400987	0.526249	0.155864	0.0010891	-0.00194931	0.592469	0.224709	0.640963	0.807644	0.402902	0.176726	-0.691517	-0.79847	-0.105982	-1.32755	-0.593458	-0.470571	-0.408503	-0.578506	0.0877285	-0.0010891	-0.045351	0.101324	0.229441	0.0109482	0.207123	0.164776	0.022624	-0.193323
201235_s_at	BTG2	-1.04879	-0.0286608	-0.00119305	-0.273086	-0.136185	0.18441	-0.797083	-0.802787	0.784966	-0.315886	0.833517	0.0578628	0.00119305	0.3446	-0.0850492	-0.235959	-0.19775	0.0820122	0.695262	0.550857	0.860338	0.614825	-0.0841341	-0.448757	-0.0424113	0.110579	-0.118996	-0.74536	-0.468468	0.17862	-0.431476	-0.604885	0.127354	0.149607	-0.233324	0.467629	0.262007	0.408667	-0.140653	0.104184	0.00848722	-0.00848722	0.367514	0.468558	-0.458184	0.23049	-0.125571	-0.0622787
201236_s_at	BTG2	-1.51138	-1.04885	-1.26609	-0.897598	-2.44337	0.306098	-0.03479	0.340748	0.797021	-0.0262318	0.406184	0.335369	-0.694099	0.565766	0.306283	-0.582946	0.643205	0.293488	0.0262318	-0.463314	0.989164	-0.264088	-0.00657177	-1.61347	0.60093	-0.862204	1.10133	0.198525	-0.56314	0.0935907	0.0628233	-0.325431	-1.6014	0.00657177	-1.2348	-1.93329	0.617469	1.5554	-0.775221	-0.408966	0.121634	2.08977	-0.277325	0.429152	-0.156906	0.333404	0.317081	-0.868437
201237_at	CAPZA2	-0.0913906	-0.107783	-0.222558	-1.1499	0.112609	0.448386	1.04622	0.978359	0.194006	-0.238549	-0.580628	-0.219973	-0.282194	0.231132	-0.455294	-0.159855	1.67777	0.172862	0.304047	-0.0645208	0.0645208	0.390535	-0.135921	-0.62721	0.55337	-1.94427	-0.390797	0.60258	0.527206	-0.255286	1.79534	2.34089	0.459992	-0.420543	-1.02557	-1.83827	0.00487518	-0.00487518	-0.801395	0.403961	0.377486	0.782456	-2.06096	0.377997	-0.396506	-0.753552	-0.396066	-0.504145
201238_s_at	CAPZA2	0.0643311	0.0783558	-0.963272	-1.11984	-0.356421	-0.0932732	0.847098	0.6168	-0.398176	-0.381325	-0.0658703	0.325151	0.064333	0.0287151	0.0577793	0.0348015	0.144039	-0.279161	0.0424347	-0.284053	-0.460901	-0.0287151	0.0887604	-0.161483	-0.0873556	-1.05188	-0.581473	0.961602	0.655227	-0.700951	-0.490084	0.584602	0.499987	-0.310628	0.0873556	-1.58582	-0.228063	0.322865	0.0929565	0.125061	0.224611	0.334761	-3.31194	-0.11092	-0.418208	0.0334187	0.306541	0.132112
201239_s_at	SPCS2	-0.126738	-0.720652	0.624974	0.549913	0.558593	0.0759869	-0.104935	-0.161227	-0.416418	-0.153686	-0.409031	-0.00183678	-0.142798	0.00183678	-0.197867	-0.0818567	0.782084	0.0660877	0.0105543	0.105808	0.412025	0.459836	0.521309	-0.378232	0.64364	1.15546	1.42229	-0.485785	-0.716981	-0.91292	-0.392751	0.224133	0.47301	-0.275963	-0.317143	-2.03922	0.517	0.125434	0.220996	0.351	0.607762	-0.659945	-1.14275	-0.125434	-0.192241	-0.466717	-0.149922	-0.182628
201240_s_at	SPCS2	-0.176727	0.145416	0.264336	0.035553	-0.157537	0.000354	0.127703	-0.0897064	-0.307329	-0.197962	-0.168495	0.0601692	-0.0581827	0.214366	0.0617371	0.287015	0.380535	-0.217131	-0.14331	-0.186356	-0.000355	0.0956535	0.255671	-0.269558	0.337845	0.37491	0.461582	0.00696564	-0.174988	-0.849402	0.271395	0.679974	-0.130644	-0.505529	-0.470847	-1.67698	-0.00696659	0.0896606	-0.175745	0.403207	0.435893	0.217129	-3.23271	-0.346937	-0.165794	-0.134895	0.131439	0.0257158
201241_at	DDX1	-0.316577	-1.15101	-0.615594	-0.644924	-0.0195751	0.486968	1.33758	1.37897	-0.175392	0.326112	0.0274763	-0.116863	-0.366972	-0.211803	-0.307493	-0.132689	0.599518	0.281903	0.38559	0.0969648	0.251795	0.0195751	0.715276	-0.352841	0.168087	-0.483107	-0.483852	1.09188	1.16268	-0.513641	0.137073	0.541512	0.119042	-0.676371	0.10393	-1.72378	0.133441	-0.13659	-0.0160255	-0.0927982	0.0160255	-1.08394	-1.69662	0.382813	0.275642	-0.0469933	-0.170688	-0.424948
201242_s_at	ATP1B1	0.646336	-1.73935	-1.1128	-2.8347	0.615936	0.471563	0.0297832	-0.0297842	0.863243	0.125668	0.146295	-0.577415	-1.14923	-0.95037	-1.49734	0.274236	0.597294	-0.743745	-1.04799	-0.384534	0.199376	0.265185	-0.0793572	0.152396	-0.876557	-2.21509	-1.7274	-0.0315819	-0.175628	-0.540945	0.601912	0.120182	-0.364983	-0.137021	0.368965	-0.251932	0.660092	0.325964	0.0315819	-0.0848579	0.306358	0.793983	0.745515	1.09937	-0.0990591	-0.122138	-0.902948	-1.35646
201243_s_at	ATP1B1	0.217377	-0.0404711	-0.546203	-0.523033	-0.127584	1.10925	1.03764	0.653314	0.273291	0.237908	0.209897	0.14621	-0.0309458	-0.118464	0.059041	0.0309458	0.321374	-0.0572081	-0.41399	-0.44203	-0.323379	-0.294389	0.490788	-0.283469	0.160373	-1.48477	-0.588419	0.537201	0.344131	-1.50042	0.630859	0.518359	-0.0189161	-0.122039	-0.496851	-1.70032	0.202642	0.0189161	0.0452747	-0.0612774	0.215796	0.783505	-0.13199	-0.0628061	0.0189962	0	-0.0827007	-0.224466
201244_s_at	RAF1	-0.214383	-0.495535	-1.48515	-0.810033	-0.102183	0.895477	0.823532	0.959739	-0.200344	0.122066	0.00150299	-0.0144777	-0.158816	0.229722	-0.143934	-0.00150299	0.195487	0.391754	0.210775	0.243145	0.0207481	-0.125661	0.640985	-0.0299673	-0.146296	-0.859147	0.143087	0.934846	0.932933	-0.176565	-0.367167	0.0882416	0.0951347	-0.595038	0.289175	-1.2933	-0.15299	0.000352	0.108249	-0.0207167	-0.000352	0.330146	-0.96013	0.307461	0.205724	0.0938444	0.00594139	-0.124524
201247_at	SREBF2	0.284019	0.0706577	0.0378542	-0.143585	0.45972	0.600374	0.256314	0.59772	-0.143585	-0.07652	-0.0437899	0.00160885	-0.403203	-0.100105	0.0153923	-0.0893793	-0.073329	-0.105568	0.34441	-0.351995	0.0811501	-0.00160885	0.0328016	-0.16472	-0.0392752	-0.370199	0.083107	-0.00835514	0.435922	-0.206528	-0.139508	-0.371684	-0.0671635	0.0886765	-0.106726	-0.372232	-0.139379	0.00835514	0.0582609	0.079361	0.326494	0.298693	0.739795	0.0482683	0	0.00698948	-0.00650215	-0.259902
201248_s_at	SREBF2	0.0930548	0.567664	0.326226	0.117869	0.351637	0.353933	-0.349247	-0.0342917	-0.0398211	-0.122169	0.00347519	-0.127727	-0.0689898	-0.0689421	0.109951	0.00295973	0.336062	0.0571389	-0.115141	-0.160377	-0.00295973	-0.0241714	-0.155663	0.421144	-0.208022	0.549371	0.228804	0.020853	0.0162988	-0.390406	-0.611614	-0.277173	-0.42696	1.07685	0.219015	0.306591	-0.0178995	-0.0162992	-0.306463	0.131065	-0.137032	0.433846	0.503521	-0.0918088	-0.241033	-0.0364051	-0.181523	-0.106563
201249_at	SLC2A1	-0.166203	0.127258	0.78737	-0.0830069	0.118096	0.280737	-0.22233	-0.265601	-0.457998	-0.0638952	0.152549	0.00347138	-0.0268226	-0.00347138	0.101366	0.0981798	-0.253461	0.0800986	-0.0566087	-0.0291114	0.154917	0.00897026	0.176155	-0.108332	-0.159515	-0.313187	-0.129755	-0.335304	-0.0719748	-0.330014	0.0465937	-0.405639	-0.0484385	0.156915	0.0246792	0.443598	0.0651674	0.0511856	0.462018	-0.0246792	0.129272	-0.0638008	0.08074	0.161409	-0.152057	0.00510645	-0.118044	-0.0148396
201250_s_at	SLC2A1	-0.0503063	0.20071	0.771396	0.396941	0.497993	0.0159664	-0.0159664	-0.315992	0.046515	-0.100543	0.782941	-0.242972	-0.105094	-0.240553	0.333142	0.0816131	0.0386605	-0.258002	-0.475742	-0.229165	0.077425	-0.121618	0.0274553	-0.124317	-0.356369	0.418523	0.760803	-0.581042	-0.744241	0.247328	-0.236292	0.137311	-0.725965	1.1349	-0.0422864	-0.0274549	-0.307814	0.154202	0.228032	-0.15077	0.340342	0.97211	-0.0561295	0.172124	-0.274538	0.732896	-0.411639	-0.273536
201251_at	PKM	0.449417	-0.280787	-0.466387	-0.25113	0.387419	1.15489	1.16329	0.65652	0.22203	0.409151	0.775182	-0.239649	-0.209566	-0.182092	-0.242157	-0.430195	-0.49105	0.295938	0.0750561	0.447721	-0.245811	-0.0750556	-0.595837	0.699181	0.138935	0.347673	1.49497	0.936355	0.606664	0.234761	-0.989702	-0.694766	-0.0477662	-0.00438738	0.262403	-0.391076	-0.406993	-0.300053	0.111897	-0.268343	-0.218797	0.0043869	0.863983	-0.31266	0.569717	0.861719	-0.11233	-0.124487
201252_at	PSMC4	0.857786	-0.658902	-0.821546	-0.970031	0.716365	0.807465	0.914193	0.80072	0.524417	0.425774	-0.303444	-0.239015	-0.15484	-0.175534	0.106896	-0.4852	-0.748471	0.757011	0.918795	0.835844	-0.106896	-0.211316	-0.237196	0.488433	-0.243348	0.144061	0.11361	0.632763	0.903123	0.415237	-0.615836	-1.19735	0.0237784	-0.639855	0.63241	-0.361675	-0.437343	-0.0237784	0.100986	-0.206278	-0.205669	-0.349514	0.398647	0.516343	0.513536	-0.12887	-0.207642	0
201253_s_at	CDIPT	0.00702763	-0.118915	-0.209394	-0.542172	-0.0289297	-0.323211	-0.791189	-0.650025	-0.0318384	-0.0580215	0.269644	0.313161	-0.00702667	0.171604	0.0807686	0.542856	-0.491589	0.00719547	0.308322	0.144161	0.346075	0.31068	0.0198202	0.172516	0.0036478	-0.341721	-0.322031	-0.638037	-0.375899	-0.516161	0.461512	-0.00364685	-0.133001	-0.203487	0.193613	-0.831082	-0.111921	0.339361	-0.0233402	0.175745	0.426149	0.182429	0.575086	0.173439	-0.142835	0.206919	0.241914	-0.0917206
201254_x_at	RPS6	0.0692415	-0.0144739	0.59596	0.470314	-0.466863	0.536749	0.887751	1.13669	0.448372	0.139567	0.0588093	0.0144749	-0.20488	-0.690248	-0.558632	-0.456782	-0.165405	0.41953	-0.248322	-0.150357	-0.297998	-0.398938	-0.550717	-0.116349	0.0247612	0.640607	0.661165	0.313588	0.327165	-0.354606	-0.240798	0.184768	0.0886726	0.151927	-0.0247602	-1.556	-0.189383	-0.373208	0.197173	-0.271899	-0.311377	0.199765	-0.724688	0.228754	0.203826	0.0886087	-0.0187712	-0.244002
201255_x_at	BAG6	0.23277	-1.22439	-0.742534	-0.815529	0.11969	0.829782	-0.195271	-0.231826	-0.29553	-0.189359	0.076889	-0.0562992	0.00417423	-0.00417423	0.03158	0.0042944	-1.17496	0.641819	0.664963	0.215377	0.0248384	-0.252542	-0.179378	0.810302	0.387425	0.0827618	0.494503	0.333041	0.343179	-0.161946	-0.49268	-1.06109	0.0250578	-0.329092	0.610501	-0.219774	-0.0644798	-0.0568838	0.476669	0.179384	0.307642	-0.647357	-0.052268	-0.0250578	0	0.220959	0.0639334	0.107196
201256_at	COX7A2L	0.17571	0.625637	-0.135939	-0.272607	-0.165299	0.309216	0.27445	0.312606	-0.61795	-0.00348663	0.00348759	0.0157127	0.198793	0.0473976	-0.0724792	-0.071825	0.412895	-0.0716915	-0.0245895	0.0402641	-0.0991068	-0.448583	0.0177994	-0.280573	0.146612	-0.518608	-0.0860052	-0.0361195	0.140773	-0.862363	0.0131693	0.246526	0.150631	0.527134	-0.14069	-1.29328	0.226852	-0.0131683	0.216255	0.115126	-0.233856	0.488886	-1.3108	-0.424322	-0.0598745	0.00526047	0.0288544	0.132282
201258_at	RPS16	0.648751	-0.143199	0.0122128	1.30094	0.419369	-0.716964	-0.22458	0.136181	0.802571	0.216677	0.506725	-0.710631	-1.82017	-1.82374	-2.00276	-1.55432	-4.39692	0.723054	0.629852	1.38306	-0.227354	-0.0122128	0.533448	1.11178	1.1198	1.75634	-1.68634	-0.374526	-0.24912	0.753115	-0.648857	0.864656	1.28824	0.742114	0.912422	-2.04956	0.306109	-1.02503	-1.07406	-1.08803	-0.740585	-0.989911	-2.19177	0.24912	1.00773	1.32125	0	-1.07398
201259_s_at	SYPL1	0.654896	-0.45969	-0.249587	0.751892	0.559218	0.63525	1.24988	0.957963	-0.125971	0.00990057	-0.424716	-0.479034	-0.0584869	-0.120946	-0.301631	-0.00990057	0.13443	0.161708	-0.142291	-0.0842462	0.0254254	0.0315628	0.810286	-0.721139	1.2842	-0.396579	-0.99037	0.586199	0.633264	-0.57744	0.0726252	0.836337	-0.261191	-0.321376	-8.01e-05	-0.705335	0.294221	8.01e-05	0.0858216	0.524288	0.330676	-0.660572	-0.346854	-0.0934825	-0.0464015	-0.491645	-0.600253	-0.245045
201260_s_at	SYPL1	-0.245187	-0.721968	-0.817601	-0.310245	-0.0324068	0.170071	0.743516	0.534709	-0.458447	-0.123822	-0.4849	0.207459	0.101693	0.265795	0.12439	0.237195	0.503282	-0.406953	0.0324068	-0.250941	-0.049571	0.148359	0.173594	-0.79841	0.132637	-1.27302	0.00277233	0.29981	0.144795	-1.03967	0.173316	0.595142	-0.342883	-0.41245	-0.468246	-2.06321	-0.456018	-0.00277233	0.00592327	0.251758	0.3032	0.370981	-2.72622	-0.495534	-0.243746	-0.440554	0.0948296	0.0773411
201261_x_at	BGN	-0.596188	-0.71679	0.453536	-0.112109	-0.915978	-0.633624	-0.901564	-1.00502	0.677148	0.291993	1.28723	0.83771	0.531132	0.836054	0.471853	-0.0566387	-0.199767	0.140865	0.822414	-0.0227137	-0.0678863	0.0227137	-0.70338	0.630707	-0.403749	2.1316	2.18692	0.537292	0.376082	1.07437	-0.283176	-0.248225	0.53827	0.696332	-0.650417	0.152944	-1.22398	-0.131156	-0.203366	-0.64297	-0.659024	0.305572	0.131155	-0.273007	0.72929	1.76431	1.29282	0.901736
201262_s_at	BGN	-0.453499	0.332962	0.401579	0.11117	0.209937	0.18123	-0.0686679	-0.068994	0.0517144	0.093832	0.0958314	-0.216604	-0.0382996	-0.400242	-0.168896	-0.196542	-0.438961	0.274254	0.0382996	-0.180705	-0.290121	0.0778298	-0.0115786	-0.403728	-0.45817	-1.18534	-0.0916381	-0.0972939	-0.0795422	0.031332	0.395806	-0.234404	-0.0830736	0.0908804	-0.215197	0.857596	0.206203	-0.108777	0.0544891	0.0115786	0.135466	0.372028	0.757122	0.414802	0.0510821	0.0346861	-0.167481	-0.121233
201263_at	TARS	0.184032	-2.47248	-0.678661	-0.696801	0.0618305	-0.33483	0.179713	0.0453348	-0.523218	-0.297299	-0.11483	0.0485277	-0.0303154	-0.00731468	0.147053	0.226954	0.00731468	-0.197414	0.185409	0.0400543	-0.19971	0.0794973	-0.247005	0.192278	0.358767	-0.13639	0.308692	0.216599	-0.0112391	-0.562175	-0.298743	0.0112391	0.0349951	-0.547509	0.231517	-2.29105	-0.290259	0.236902	0.171206	-0.0398254	0.102236	-0.502439	-1.48899	0.475154	-0.0836782	-0.0168028	0.206369	0.0507793
201264_at	COPE	0.482562	-1.52184	-1.01668	-0.75839	1.75217	1.14497	0.127629	0.187328	1.33056	-0.519	-0.127629	-1.02805	-0.417565	-1.02512	-1.0491	-0.849331	-2.02404	0.785853	1.04636	1.75905	0.666105	0.67438	-0.210397	0.0331106	-0.0141382	0.608203	0.269457	0.491332	0.520633	0.796063	-1.42322	-1.30684	-0.133785	-0.638605	0.247485	-0.384848	-0.608015	-0.717737	0.0185342	-0.666115	-0.611658	0.0141382	0.747022	0.890275	0	0.642273	-0.216552	-0.0525045
201266_at	TXNRD1	-0.414743	-1.10454	-1.66048	-0.666142	-1.05592	-0.0685062	1.00266	0.567603	-0.13991	-0.0932169	-0.0857973	0.429217	0.305734	0.28491	0.292918	0.173757	0.0391521	-0.0391521	0.538311	-0.160825	0.0402899	0.161895	0.189328	-0.289823	0.146279	-1.23968	0.0560083	1.32835	0.734371	-0.475447	0.541948	1.70848	-0.315471	-1.00784	-0.705571	-1.20268	-0.0560083	0.286264	-0.0634422	0.25225	0.383183	-0.421112	-0.909891	0.278592	-0.0843592	0.041708	0.490078	0.397549
201267_s_at	PSMC3	-0.207355	-0.901556	-1.45249	-0.0968938	1.08452	0.432488	0.720103	0.685064	0.417846	-0.0566025	-0.232942	-0.439648	-0.410648	-0.242877	0.056602	-0.333156	-0.308752	0.640344	1.05155	1.36497	0.926661	0.720412	0.852202	-0.465977	0.528134	0.356006	-0.453035	0.451289	0.162106	0.4886	-0.607233	-0.0890512	0.624934	-1.3363	-0.519269	-1.491	0.0945458	-0.698257	-0.0534749	0.0534749	0.125739	-0.831193	-0.773246	0.73643	0	-0.23109	-0.393816	-0.210385
201269_s_at	NUDCD3	-0.137498	0.186626	-0.179628	-0.209188	-0.00463867	0.180405	0.00658417	-0.246475	0.249068	-0.0286789	0.177097	0.0869999	-0.0310354	0.00463867	0.0213585	0.318033	-0.128884	0.089056	0.091054	-0.0248146	-0.0716696	-0.0984902	0.0123401	-0.215992	-0.0137992	-0.169702	-0.0306873	-0.158422	-0.362261	0.105509	0.223864	-0.29082	0.0132418	0.337043	0.613692	0.0601077	-0.0230551	-0.10837	0.0706615	-0.0123401	-0.125984	0.379836	0.473659	0.280246	-0.0254316	0.103425	-0.0694451	-0.0387254
201270_x_at	NUDCD3	0.520131	-0.128555	-0.226781	-0.111897	-0.44901	0.709085	-0.125478	-0.142628	0.389035	0.170114	0.331024	0.133087	0.162194	0.178471	-0.0587406	-0.0125685	-0.167756	0.0125685	0.208333	0.100789	-0.223134	-0.214981	0.234707	0.429518	0.298227	0.174828	0.407293	-0.120453	-0.0296927	0.231459	0.623608	0.030055	-0.0629063	-0.198236	-0.0849848	-0.438862	0.0296927	-0.401587	-0.302417	-0.153289	-0.165657	-0.569042	0.362301	0.227	0.198925	0.306115	0.150394	0.177431
201271_s_at	RALY	0.337242	-0.813969	-0.381912	-0.131812	0.482405	0.258285	0.170939	0.265583	0.458561	-0.0868778	0.299263	-0.232037	-0.728683	-0.404582	-0.670381	-0.755637	-0.604259	0.283306	0.676364	0.905273	0.0117054	-0.0117059	0.0472837	0.461683	0.65547	0.797409	0.320346	0.368236	0.376663	0.536074	-0.34904	-0.728829	0.0130425	-0.800125	0.0221224	-0.301869	-0.0130425	-0.602169	-0.499749	-0.640188	-0.69355	-0.0879064	-0.0322213	0.250507	0.0826111	0.575571	-0.210809	-0.461716
201272_at	AKR1B1	0.699696	-1.43945	0.152069	0.578905	-0.0653639	-0.0293541	1.32023	0.430821	1.41453	0.0896378	0.53227	-0.344332	-0.299011	-0.210619	-0.165354	-0.108297	-0.543252	0.0293541	0.532682	0.199435	-0.0868711	-0.328847	0.424335	0.937344	0.71294	1.24661	0.929583	0.750152	0.273052	1.30955	-0.603882	0.157092	-0.496914	-0.560517	-0.157092	-1.29267	-0.614651	-0.217247	-0.501499	-0.410835	-0.440281	2.12629	-0.510189	0.291462	0.342669	0.708906	-0.0284119	-0.0268822
201273_s_at	SRP9	-0.487642	-1.42009	-1.89669	-1.53772	0.0979528	-0.115653	0.876002	0.851112	-1.27844	-0.293793	-0.263203	0.114755	0.0810146	-0.039135	-0.0730247	0.146606	0.420675	-0.0272684	0.0272694	0.292384	0.0638266	0.300972	0.19778	-0.865477	-0.140844	-1.50249	-0.0361023	1.26074	0.498011	-1.62446	-0.350834	0.0846758	0.091548	-1.53924	-0.302058	-2.82002	-0.306228	0.305138	0.182567	0.535921	0.393045	0.489366	-2.68298	0.0361023	-0.375699	-0.256452	0.154841	0.0703201
201274_at	PSMA5	0.249329	-1.79131	-0.760459	-0.232015	0.614556	0.0147333	-0.0147333	-0.294502	-0.10052	-0.177484	-0.220384	-0.213192	0.0291424	-0.115203	0.0162277	0.0845737	-0.0865164	0.359278	0.471631	0.543371	0.277513	0.277318	0.014328	0.132914	0.470037	0.408619	-0.0785999	-0.00775051	-0.070776	-0.228334	-0.954972	-0.0561142	0.00775051	-0.933585	0.290198	-1.87501	-0.0774746	0.336578	0.37761	0.151145	0.172133	-0.576704	-1.89452	0.311748	-0.216373	-0.308456	-0.236826	-0.00578213
201275_at	FDPS	0.0372677	-0.79427	-0.201784	-0.126445	0.816158	0.116117	0.296095	0.277055	0.551104	0.0021925	-0.246868	-0.246023	-0.14507	0.144949	-0.0940866	-0.528124	0.014163	0.145419	0.518273	-0.0021925	-0.011014	-0.125013	0.0992222	0.233847	0.706245	0.202942	-0.472336	-0.132387	0.267635	0.526649	-0.835628	-0.400461	0.367437	0.0210323	0.285005	-1.29374	-0.0210323	-0.349115	-0.0241127	-0.242178	-0.206144	-0.762233	0.107805	0.57209	0.144384	-0.145539	-0.197336	-0.0731916
201276_at	RAB5B	0.259035	0.448034	-0.176459	-0.172449	-0.133443	0.234995	0.720328	0.533401	0.436241	0.606173	0.371927	-0.1143	-0.0822144	0.109428	-0.167962	0.0822148	-0.34994	-0.102	0.598646	-0.62914	-0.130013	-0.285736	0.55516	0.40438	-0.170304	-0.0131426	0.435577	0.602978	0.534378	0.0131426	0.96237	0.58525	0.291725	-0.587138	-0.131521	-0.45469	-0.393051	-0.0920329	-0.268314	-0.307727	-0.162769	-0.123063	0.0716605	0.0569067	0.723155	0.373852	-0.0748534	-0.124475
201277_s_at	HNRNPAB	0.358449	-0.628623	-0.142129	-0.031908	0.40977	0.167047	1.06629	0.854398	0.21539	0.0309696	-0.432826	-0.281988	-0.539896	-0.38627	-0.175725	-0.540208	0.253189	-0.000252	0.000252	0.0895386	0.325734	-0.0790253	1.00307	0.31914	0.526622	0.286078	0.0652704	1.14859	0.893361	-0.071146	0.593359	0.536716	0.106297	-0.0652704	-0.265005	-1.10308	-0.216866	-0.0861378	-0.125134	-0.395327	-0.140268	-0.48753	-1.09513	0.180897	0.0806007	-0.379559	-0.174135	-0.519579
201281_at	ADRM1	0.155421	-0.487059	-0.785998	-1.11439	0.4737	0.374147	0.0791583	0.0450087	0.0466285	-0.00453043	0.333045	-0.354183	-0.0742292	-0.392864	0.00452995	-0.325142	-1.31221	0.738639	1.09999	0.74825	-0.384717	-0.345567	-0.0136061	1.50455	-0.406255	0.800091	0.180173	0.275218	0.602926	0.113898	-1.48326	-1.34234	-0.0572443	0.0136061	0.831506	-0.254437	-0.787408	-0.104095	0.298193	-0.116335	-0.483197	-0.0744863	0.942255	0.18115	0.229747	0.527663	0.00426817	0.274128
201282_at	OGDH	0.602447	-0.087081	-0.756489	0.13004	0.830441	1.60113	1.7567	1.9007	0.54557	0.0379133	0.0358858	-0.361369	-0.347632	-0.187097	-0.47977	-0.319603	-0.645138	0.0161262	-0.386635	0.291204	-0.0696506	-0.0161257	1.07898	-0.0332575	0.602951	-0.258269	0.0332575	1.60761	1.85012	-0.147172	-0.0512481	-0.714276	-0.140398	0.778904	0.631718	-0.117094	0.0455222	-0.0333662	-0.642041	-0.596301	-0.185865	0.0903664	1.18419	1.25504	0.0220761	0.266494	-0.401905	-0.635738
201283_s_at	TRAK1	-0.107461	-0.096797	0.307859	0.526577	0.138505	0.179101	-0.0361719	-0.134833	0.021637	-0.0392389	0.0432749	-0.12952	0.110938	-0.183169	-0.123123	-0.00422096	0.0629215	-0.0514398	-0.378684	0.00422096	0.119881	0.0922618	0.00416184	-0.425707	0.299286	-0.51681	0.00836515	0.235611	-0.339895	0.251062	-0.238733	-0.288077	-0.0378022	0.186488	-0.0567236	1.20769	0.0739012	-0.0926752	-0.0498199	-0.00416184	0.166951	-0.197314	0.425085	0.509469	-0.13273	0.0297618	-0.202988	0.0714135
201284_s_at	APEH	-0.158877	-2.54704	-2.04392	-0.833365	0.826773	1.14387	0.648116	0.411858	0.502328	-0.464807	0.261263	-0.666254	-0.177165	-0.308146	-0.348905	-1.36125	-1.22102	0.711882	0.470243	0.478361	0.499253	0.158877	0.0337315	0.0887022	0.642182	-0.901383	0.128514	0.466838	0.397264	0.103251	-1.10336	-1.11105	-0.373358	-1.13085	0.283006	-1.84734	-0.41492	-0.901986	0.310453	0.409999	-0.0337315	-0.885674	-0.316902	0.651769	-0.27723	0.397246	-0.508092	0
201285_at	MKRN1	0.227481	0.0489502	0.227979	-0.114684	-0.826864	0.614095	0.819755	1.00135	-0.548808	-0.0362139	-0.012764	0.0711975	0.012764	0.16212	-0.135341	0.256305	0.403677	-0.846978	-0.692509	-0.532499	-0.261511	-0.287372	0.518176	1.52343	0.656311	-0.0345173	0.776685	0.971983	0.756282	-0.779781	0.708704	1.42692	-0.315022	-0.373858	-0.272139	-0.792191	-0.076952	-0.0152225	-0.095705	0.116901	0.0152225	0.523212	-0.759216	-0.448049	0.0603142	0.170258	0.19054	0.113235
201286_at	SDC1	0.617434	-1.27846	-1.11759	-0.641243	0.113737	1.96821	1.21302	0.305346	0.460637	-0.113737	0.133181	-0.433328	0.821386	-0.11499	-0.152523	-0.446095	-0.457315	-0.662738	-0.324802	0.212834	0.200027	0.31928	-0.00625515	-0.238017	-0.0866375	-0.871157	-0.540392	0.366993	-0.0135212	-0.852557	-0.626244	-0.729187	0.131644	0.18605	0.00625515	-0.478629	-0.416651	0.154531	1.06501	0.733808	0.711915	0.407158	0.568386	0.726641	-0.381551	-0.113864	-0.786829	0.526679
201287_s_at	SDC1	0.701337	0.00278664	0.208549	-0.133073	-0.0553665	2.46046	1.26865	0.962174	-0.277773	0.175223	-0.219145	-0.442448	0.670848	-0.0751066	-0.0438194	-0.00278664	0.128099	-0.337001	-0.0942287	-0.181835	0.102606	0.257475	-0.268335	-0.292761	-0.102175	-0.0734186	0.887706	0.352348	0.0886469	-1.62037	-0.523616	-0.357565	0.0886936	0.788902	-0.238665	-0.764913	-0.404305	0.0560932	0.269584	0.518021	0.194937	0.927345	0.0769081	-0.0560932	-0.131649	-0.616451	-0.761984	0.333419
201288_at	ARHGDIB	0.335429	-0.377526	0.454001	1.73521	-0.536658	-1.36284	0.0184135	0.209449	0.865881	0.132918	-0.0184135	-0.0267057	-0.459643	0.11527	0.106155	0.144289	-0.703719	-0.212302	0.674322	-0.0269499	-0.605248	-1.02538	0.143698	1.08881	0.601194	2.08975	2.08421	0.137053	-0.415972	1.21349	-0.0304699	0.951435	0.37607	-0.512647	-1.57606	-0.737885	-1.3811	-0.86364	-1.23393	-1.53883	-1.27988	0.528413	0.0304699	-0.252876	0.671855	0.550102	0.550773	0.107797
201289_at	CYR61	-1.22974	-1.04176	0.282127	-0.14366	-1.01819	-0.915945	0.528747	1.35059	0.854259	-1.76987	0.703563	1.33059	-1.32246	0.350619	0.880625	-1.01345	0.603965	-0.0708351	0.0162315	-1.36102	0.345489	-0.0162315	-0.358976	-1.25345	1.08734	0.213342	0.520973	-0.340121	0.340598	1.22352	1.20573	0.458569	-0.258622	1.32548	-2.26988	-1.91025	0.396878	1.03119	-1.28744	-0.784065	-0.213342	1.52215	-0.7066	-0.370408	-1.64723	0.822934	1.47536	-1.29137
201290_at	SEC11A	-0.00508022	0.217242	0.605063	0.068963	-0.066885	0.17655	0.190784	0.294255	-0.482285	-0.338549	-0.190529	0.00508022	0.0363598	0.160724	-0.0658598	0.0266542	0.512587	-0.105227	-0.00888061	-0.0599995	-0.176184	-0.0703507	0.0155668	0.273078	0.638104	-0.0448647	0.281486	0.197855	0.15965	-0.664656	0.382881	0.83913	0.227047	0.17658	-0.497742	-1.19017	-0.0155659	-0.172383	-0.346851	-0.156385	-0.140025	0.199812	-0.337737	-0.62545	-0.299413	-0.215511	0.0430698	0
201291_s_at	TOP2A	0.729187	0.046339	0.150956	0.198047	0.344054	-0.204576	1.78035	0.0928369	0.153462	-0.145967	-0.199712	-0.243029	0.24247	-0.333315	-0.142579	-0.0185847	0.0697746	-0.0125818	-0.048032	-0.0239902	0.0125821	-0.0716643	-0.0465224	0.334331	-0.123694	1.14319	1.50533	1.08406	-0.0606418	0.316782	0.215213	0.664924	0.0142534	-0.117679	-0.0142536	-0.0970933	0.114263	-0.0970933	0.0735683	-0.165538	-0.0756168	0.110446	-0.103808	-0.050097	-0.121542	-0.18613	-0.249917	0.21571
201292_at	TOP2A	0.400377	0.4499	0.225413	0.499001	0.102643	-0.47128	1.65863	0.172616	0.439356	-0.0298986	-0.0544133	-0.0687499	0.180861	-0.18882	-0.0795026	-0.155321	-0.0578041	0.105662	-0.104541	-0.02315	0.02315	-0.138516	-0.0492408	0.569998	0.0083642	0.923478	0.415319	1.05478	-0.0885935	0.914024	-0.190795	0.325394	0.0195897	0.177648	-0.0083642	0.163657	-0.131506	0.0553265	-0.105216	-0.0351124	-0.107494	-0.104335	-0.236078	-0.199127	-0.0424306	0.0636549	0.0996389	0.117336
201294_s_at	WSB1	0.209233	0.902135	-0.52354	0.206189	0.322789	-0.403001	-0.359756	-0.284837	0.582521	0.142749	-0.527073	0.35655	-0.361931	-0.368035	-0.244865	-0.286433	0.18896	-0.302165	0.114186	0.214343	-0.114187	0.320901	0.893886	1.08726	-1.33078	-0.487237	1.06753	-0.238269	0.147115	-0.714273	0.870407	1.32327	0.484373	0.266872	-0.638359	0.0976553	0.311283	-0.6505	-1.28156	-0.0976548	-0.42377	1.36251	-1.03368	-1.25594	0.133726	-0.127368	0.652299	-0.131273
201295_s_at	WSB1	-0.151142	0.0422368	0.117884	-0.258894	-0.327946	-0.170631	0.135404	0.0602665	-0.193494	0.453532	-0.0531154	-0.0416527	-0.000502	-0.00236702	0.00967455	-0.0263405	0.195839	0.000502	0.1647	0.059648	-0.0146928	0.160651	0.106712	-0.136082	0.075181	-0.139282	-0.102611	0.195233	0.0135455	-0.257511	-0.0686679	0.200361	0.343743	0.116131	0.181049	-0.0135455	-0.145357	0.339106	0.101701	-0.0711508	-0.0790989	0.131331	-0.131663	-0.313044	0.427669	-0.0625462	0	-0.0141611
201296_s_at	WSB1	-0.219334	1.11598	0.713718	0.323968	-0.259019	0.08144	1.02859	1.28925	1.01572	0.124296	-0.0410032	-0.141485	-0.0727415	-0.162376	-0.168702	-0.161132	2.2332	0.057107	-0.149199	0.0410032	-0.204373	-0.135543	0.0638361	-0.266607	-0.318919	0.115211	0.289975	0.640368	0.935027	-0.605598	0.911571	1.20351	-0.543008	1.24985	-0.472324	-0.943964	0.434076	0.0269794	-0.324614	-0.701377	-0.151822	1.61594	-0.0269794	-0.94529	0.188316	-0.0389185	-0.00621414	0.0911369
201297_s_at	MOB1A	0.946921	0.376487	0.0433183	-0.0987697	-0.0229907	-0.143442	0.530575	0.308947	-0.685129	-0.0371799	-0.21005	0.066411	0.0229902	-0.196745	0.116	-0.055542	0.739092	-0.0826573	0.0707097	-0.350639	-0.0826793	0.0588436	0.0748029	-0.236801	0.328279	-1.28149	-0.724909	0.414758	0.199361	-1.27241	0.445281	0.633384	-0.169412	-0.0748029	-0.592871	-1.06074	-0.0770125	0.570558	0.157407	0.360008	0.148027	1.12845	-0.377565	-0.607829	-0.212695	-0.189245	-0.00212526	-0.014636
201298_s_at	MOB1A	0.605297	0.0801458	-0.571785	-0.24622	0.376876	0.36455	0.903878	0.788203	-0.837168	-0.229917	0.027338	-0.2668	-0.344048	-0.379136	-0.240425	-0.399885	0.582798	-0.027338	0.0481071	-0.210017	0.265234	0.307844	0.382504	-0.335056	0.614356	-0.823116	-0.732936	0.54566	0.249762	-1.31908	0.594912	0.857747	0.289409	-0.461405	0.0652962	-1.41415	-0.179329	0.339872	-0.0652962	0.240551	-0.149971	0.294784	-1.59797	-0.233261	-0.338916	-0.00973701	-0.332063	-0.492523
201299_s_at	MOB1A	0.655644	-0.561193	0.767555	0.913019	-0.294554	-0.423761	-0.536237	-0.584458	-0.574762	2.06048	0.516503	0.977029	0.664509	0.277948	-0.418647	-0.267244	0.773898	0.724116	0.267244	-0.721201	-0.367866	-0.561032	-0.79302	-0.0731077	0.332925	0.433353	-0.389904	-0.241967	-0.501543	-0.93659	0.651663	-0.746445	0.0731077	0.424043	0.297458	-0.332229	0.635413	1.43618	1.29078	0.385326	0.157811	-0.358023	-1.49292	-0.32693	1.60798	0	0.534474	0.278212
201300_s_at	PRNP	-0.330356	-0.603329	-1.06848	-0.341095	-0.0422955	0.2849	0.744574	0.446883	-0.810136	0.0422955	-0.0856905	0.114043	0.459517	-0.0488224	0.175178	0.0966911	0.394682	-0.26899	-0.327595	-0.10804	0.205655	0.270247	0.357205	-0.669099	-0.184577	-0.822226	-0.722248	0.46089	0.127913	-1.0673	0.110627	0.523372	-0.102312	-0.191704	0.0782404	-2.23677	-0.0782404	0.28806	0.310373	0.348864	0.767385	-1.59387	-1.37429	0.19241	-0.0210657	-0.227074	0.000328	0.369492
201301_s_at	ANXA4	0.17723	-1.8694	0.0251226	-0.147381	0.55579	0.437589	0.489276	0.697555	0.0643282	-0.737063	-0.0786161	-0.629984	-0.523665	-0.328296	-0.30278	-0.316592	1.12756	-0.0251226	-0.298892	0.171594	0.55282	0.178315	0.383759	0.900032	1.64376	0.404732	-0.169282	0.417121	0.708657	-0.0491676	0.0491676	0.661822	-0.229457	-1.27216	-0.175848	-2.4363	-0.109736	0.135499	-0.0534086	0.26482	-0.0711002	-1.63939	-1.63673	0.0793409	-0.614431	0.00709057	-0.535068	-0.389433
201302_at	ANXA4	0.905491	-0.144731	0.490602	-0.0431309	0.579584	1.04317	1.22459	1.24962	0.458897	-0.148384	-0.018693	-0.366811	-0.302101	-0.295316	-0.244147	0.018693	1.38546	-0.104004	-0.636921	-0.0846405	0.628551	0.0597696	0.427551	0.742012	1.01428	0.0848064	-0.131605	0.588018	0.63776	-0.302783	-0.0776348	0.760231	-0.312432	-1.31166	0.258223	-2.26671	-0.424101	0.185824	0.00203705	0.299562	-0.16541	-0.0323114	-2.5542	-0.00203705	-0.201888	0	-0.410269	-0.301527
201303_at	EIF4A3	0.0854883	-0.412641	-0.129316	0.299826	0.123938	-0.00182056	0.676465	0.475957	0.33653	-0.0596552	-0.289191	-0.211611	-0.216066	-0.231092	-0.0763559	-0.365844	0.799411	0.105207	-0.0501785	0.291767	0.0799418	0.00182056	0.420712	0.252483	0.685513	0.64375	0.0179481	0.40703	0.279239	0.469327	-0.303996	0.0508518	-0.0179481	-0.66683	-0.146676	-0.838959	-0.222321	0.042366	-0.245388	-0.403603	-0.13188	-0.362528	-1.06207	0.44649	0.0730009	-0.161864	-0.158146	0
201304_at	NDUFA5	-0.193152	-0.805276	-1.32765	-1.59313	-0.107884	-0.0902538	0.85159	0.519569	-0.277182	-0.145516	0.109937	0.157273	0.0980701	-0.0302057	-0.0900288	0.16792	0.318566	-0.00446034	0.00446034	0.0915213	0.103169	0.115959	0.0285263	-0.4799	-0.672689	-1.66896	-0.905266	0.68225	0.561198	-0.575096	-0.250349	-0.000221	0.224582	-0.644293	0.000221	-2.5793	-0.0975819	0.415701	0.212843	0.339103	0.262861	1.05991	-1.56258	0.071331	-0.31135	0.124108	0.0753031	0.00808907
201305_x_at	ANP32B	0.25332	-1.56242	0.809489	1.06709	-0.492913	-1.69087	-0.292993	-0.171618	0.40105	0.213759	0.0316553	0.669146	-0.0343561	-0.0837717	-0.461821	-0.318605	0.702046	0.315122	0.0296001	-0.0296001	0.0948191	-0.334249	0.364332	0.623633	-0.518003	0.933894	1.2583	-0.143912	-0.169316	0.153554	-0.205127	0.0591555	1.07407	-0.200775	-0.399852	-0.539185	0.035264	-0.035264	0.305011	-0.856635	-0.510415	-0.076746	1.08911	0.414914	0.275823	0.0461292	0.739455	0.0443888
201306_s_at	ANP32B	-0.00452614	0.354252	0.367408	0.631915	-0.824302	-1.11174	-1.0016	-1.12626	-0.0588169	0.00452709	-0.21521	0.0562096	0.0981283	0.339099	0.0970974	0.402439	0.386886	0.0961676	-0.009799	-0.02209	-0.221807	-0.0118208	-0.0110502	0.546303	0.326326	0.569167	0.44983	-0.741931	-0.764813	-0.101146	0.660359	0.843187	0.383472	0.375483	-0.261897	-0.687995	0.167939	0.142631	-0.0231113	0.00615788	-0.306821	-0.0353193	-0.0136528	-0.00615788	0.101876	-0.0359545	0.148178	0.173651
201307_at	SEPT11	-1.40433	-0.532719	-2.00622	-1.3037	-1.81273	-0.508005	-0.750265	-0.770643	-0.945663	0.375931	0.332756	0.623047	0.493144	0.94552	0.395905	0.833249	0.924077	0.104957	0.47594	-0.552213	0.371202	-0.104957	0.356679	0.0110464	0.278153	-1.29279	-0.0110464	0.826068	0.227276	-0.397872	0.222838	1.08346	-0.0839357	-0.417931	-0.016284	-1.45148	-0.384732	0.342626	0.185488	0.354758	0.420941	-0.151222	-0.898994	-0.219051	0.879333	0.92251	1.11963	1.04405
201308_s_at	SEPT11	-0.344161	-0.178494	-0.0624151	0.0406251	-0.227701	-0.484046	0.108729	0.0456638	-0.141272	-0.165278	-0.137034	1.18311	0.739949	1.11804	1.10567	1.26726	-0.19849	-0.097405	0.130561	-0.0406251	0.398978	0.213248	0.140064	0.0117078	-0.311099	-0.142322	0.329148	0.739828	-0.0122919	-0.265832	0.0473423	-0.284362	0.344702	-0.0678978	-0.0940242	-0.379855	-0.0440116	0.0247598	-0.00913763	0.388311	0.123609	0.104467	0.00913763	-0.142322	-0.0110669	0.00432301	1.0798	0.776797
201309_x_at	NREP	-0.0912271	0.157667	0.147934	-0.0969014	0.807904	-0.297734	-0.828734	-0.840884	-0.502661	-0.0629201	-0.380652	-0.0299897	0.163282	-0.0379171	0.222492	0.0519571	0.0491738	0.222074	-0.102873	0.222492	0.0299897	0.141153	0.0254731	-0.1511	-0.0254731	-0.167189	-0.939095	-0.776319	-0.490327	-0.474199	-0.43419	-1.25113	0.418488	0.327492	0.487274	0.803624	0.616263	0.375625	0.152988	0.660883	0.26683	-0.616088	0.0430822	-0.207104	-0.283859	-0.567208	-0.191496	-0.0080719
201310_s_at	NREP	-0.207407	-0.0668182	-0.0768938	-0.614322	0.650715	-0.288111	-0.00493145	0.0162954	-0.76773	0.504088	-0.654369	0.16923	-0.134022	0.146276	0.316481	0.0932789	0.248706	-0.192446	-0.325648	0.00493145	0.45999	0.177617	0.814658	-0.405624	0.548924	0.0078268	-0.493513	-0.377596	-0.108355	-1.18102	0.554308	0.219829	0.714744	-0.659796	0.780358	-0.847684	1.0153	1.07641	-0.0078268	1.07785	0.673403	-1.12381	-1.31743	-0.720579	0.321455	-0.847481	0	-0.311442
201311_s_at	SH3BGRL	0.0827708	0.198241	0.0399385	0.538554	0.12584	-0.978786	-0.148496	-0.176753	-0.331135	-0.0143442	-0.0171928	0.0143447	-0.043848	-0.158282	-0.227707	-0.37107	-0.240805	0.289464	0.516608	0.243326	0.220822	0.534169	-0.00653029	0.110228	0.92667	0.633248	-0.390871	0.269874	-0.48075	-0.464708	-0.497711	-0.437739	0.141709	-0.28062	-0.116328	-0.302194	0.605682	0.00652981	0.68218	0.166476	0.172191	-0.761949	-0.58936	0.122324	0	0.193933	-0.0308409	-0.150335
201312_s_at	SH3BGRL	-0.227098	-0.742942	-0.248471	-0.317903	-0.546355	0.0836973	1.05188	1.20165	-0.14733	-0.0296583	-0.0169764	-0.135699	0.0169764	0.0254965	0.026617	0.481528	0.707168	-0.262219	0.539006	-0.0852032	0.0309038	0.0721846	0.225814	-0.175805	0.374888	0.0652761	0.740044	0.756333	0.262247	-0.72951	-0.259849	0.271202	-0.144725	-1.42705	-0.258779	-2.38891	-0.506597	-0.0198812	0.0198812	0.0904989	-0.0448341	0.458777	-3.82916	0.254434	-0.0639448	0	-0.132442	0.0295229
201313_at	ENO2	0.065279	0.232085	0.0595512	0.625073	-0.153287	-0.371493	-0.022151	-0.236213	0.264594	-0.147994	0.0272756	-0.485878	-0.300048	-0.175011	0.0365114	-0.236425	-0.0714974	-0.324238	0.221505	0.144698	0.0720434	0.022151	-0.360462	0.295235	-0.0208049	0.531618	1.82836	0.278033	-0.19305	0.617489	-0.113798	0.780527	0.608961	0.0688615	-0.663875	0.35533	0.066761	-0.0399399	-0.26258	-0.31498	-0.491264	-0.0632219	0.0208054	-0.303329	-0.0151396	0.431568	-0.327166	-0.170737
201314_at	STK25	0.186108	-0.641931	-0.652957	-0.290027	0.0350356	1.06614	0.24718	0.321195	-0.147997	-0.11391	0.398544	0.136013	-0.0661674	0.276236	-0.0350356	-0.220306	-1.22584	0.464636	0.429446	0.229727	-0.218395	-0.205313	0.0377946	0.406344	0.306627	0.272311	-0.303278	0.670422	0.920845	0.228138	-0.457843	-0.814235	-0.380255	-0.0377946	0.37557	-0.760758	-0.479035	0.119128	0.180602	0.0407596	-0.167187	-0.101362	-0.43714	-0.269287	0.109722	0.334888	0.20906	0.0241613
201315_x_at	IFITM2	0.471872	-1.57008	-0.465966	0.0696936	-0.226581	-0.422121	-1.46738	-1.34221	0.971952	0.276067	0.541941	0.0261211	-0.530516	-0.211522	-0.0261221	-0.219079	-2.26306	0.455158	0.828174	0.605976	0.365028	0.318519	0.357491	1.86596	1.20635	2.63295	1.57432	0.00835514	-0.452317	1.68462	-0.207673	0.0979347	0.915859	-1.34511	-0.792101	-1.20202	-1.09416	-0.474209	-0.702642	-1.40771	-0.291243	-0.00835514	0.0762176	0.739471	0.78514	1.20744	0.656733	0
201316_at	PSMA2	0.130828	0.357999	-0.332735	-0.289311	-0.159667	0.128716	0.204741	0.257183	-1.1708	-0.0893984	0.0162649	-0.267612	-0.042203	-0.0126801	0.0126801	-0.0659285	0.650831	-0.0254898	-0.164955	0.305147	0.100163	0.340867	0.423014	-0.457887	0.529247	-0.675076	-1.44133	-0.128145	-0.0825252	-1.15605	0.554524	0.404087	0.176464	0.144145	0.166367	-1.47788	0.0498409	0.0182161	-0.178464	-0.0182161	0.253044	0.365621	-0.630638	-0.0372305	-0.234174	-0.0454111	-0.339768	-0.16232
201317_s_at	PSMA2	0.288537	-1.93966	-0.994445	-0.403218	0.333925	0.389127	0.785832	0.817373	-0.0983009	0.117125	0.0202694	-0.34198	-0.459373	-0.488279	-0.287317	-0.504321	0.0674829	-0.0811396	0.319831	0.309737	-0.0202694	0.123733	0.512816	0.0206318	0.295632	-0.400711	-0.224022	0.459801	0.41333	-0.591608	-0.230235	0.403147	0.298788	-1.28446	0.0117664	-3.51228	-0.0230484	0.032177	0.0308704	0.162123	-0.0117664	-0.0643272	-2.1171	-0.255156	0.0088768	-0.0935507	-0.488738	-0.612727
201319_at	MYL12A	-0.408803	0.180377	0.0573311	0.144446	-0.556186	-0.847742	-0.469079	-0.454218	0.148606	-0.20371	0.0853586	0.0949698	-0.0308542	0.00521183	0.211555	0.118927	-0.169324	-0.244683	0.00286198	0.0179987	-0.0935431	-0.00286198	0.0972834	0.513223	-0.0788002	0.658147	0.305732	0.268689	-0.378658	0.792011	0.0788002	0.403352	0.237179	-0.372799	-0.460393	-1.24322	-0.112358	-0.14152	-0.158175	-0.441896	-0.288104	0.544258	-1.36627	0.129251	0	0.291546	0.456488	0.210655
201320_at	SMARCC2	-0.671252	0.06705	0.194678	0.257988	-0.31671	0.366774	0.37251	0.136343	0.193205	0.157719	-0.196762	-0.192483	0.00180674	-0.108274	-0.0529399	-0.00180626	1.27489	-0.0162477	-0.0393958	-0.565398	0.0632691	-0.175048	0.1539	-0.616228	-0.0240359	0.0240364	-0.156186	0.389361	0.28881	0.827493	0.0761757	-0.280682	-0.151751	-0.235081	-0.231943	0.126038	0.52461	-0.264961	-0.553568	0.036458	-0.0921054	0.338059	0.571714	-0.204428	0.158272	-0.144529	-0.219102	0.0492935
201321_s_at	SMARCC2	-0.0528607	-0.965191	-0.36664	-0.670508	-0.20906	0.30541	-0.919806	-0.486029	-0.356942	0.471927	0.309006	0.210762	-0.598706	-0.274933	-0.225969	0.0528607	0.121414	0.313918	0.784819	0.505416	0.577928	0.436379	-0.198079	0.129426	-0.00595808	0.585201	0.558905	-0.0719714	0.0228519	0.00595808	-0.180333	-0.172591	-0.0974798	0.190209	0.0310621	-0.0141459	-0.0290189	-0.145071	-0.295795	-0.256606	0.0650425	0.43285	2.04011	0.0395012	0.755197	0.359863	0.153666	-0.442145
201322_at	ATP5B	0.0407553	-1.35824	-1.78118	-0.535051	0.213414	1.21519	1.13755	0.982452	-0.0576944	0.113091	-0.0366564	-0.559854	-0.339893	-0.417109	-0.470318	-0.388954	0.166379	0.300964	0.115639	-0.0545454	0.152413	0.0366564	0.681429	-0.331697	0.741707	-0.877041	-0.29532	0.972866	0.898923	-0.733996	0.0382872	0.2201	-0.0382881	-1.27583	-0.128139	-2.40546	0.17177	-0.114524	0.156969	0.242155	0.141719	-0.0980148	-0.342875	0.770936	-0.00346565	-0.101417	-0.690649	-0.592817
201324_at	EMP1	0.35105	-0.850842	-0.768327	-1.16422	-1.58678	-1.09222	-0.50963	0.826656	-0.848983	0.146266	0.667816	0.807963	-0.688794	1.13241	3.10906	-0.146266	0.968237	-1.16097	1.10436	-1.07647	0.256009	0.538199	0.0805287	0.406645	-0.4147	-0.0805287	0.838565	0.19515	-0.650854	0.37388	-0.705704	1.81748	-1.66537	0.497524	-1.36973	-1.94283	-1.98067	2.54991	-0.964303	0.533114	2.23847	2.61856	-1.8364	-1.0272	0.264607	0.80119	1.04547	-0.579127
201325_s_at	EMP1	0.129542	-0.0941534	-0.370491	-0.543031	-0.668718	-0.563412	-0.100245	0.403755	-0.152224	0.089119	0.282304	0.462315	-0.622008	0.451832	2.70057	-0.089119	0.57071	-0.718656	1.01647	-0.613677	0.196608	0.24911	0.261816	-0.00769663	-0.261261	-0.332993	0.340087	0.201894	-0.325179	0.37962	-0.0240436	1.35655	-0.550679	0.663607	-0.568578	-0.34993	-0.527492	1.59082	-0.154245	0.682857	2.03622	1.08304	-0.530276	0.00769663	0.00166893	0.216414	0.284005	-0.488009
201326_at	CCT6A	0.0101452	-0.563786	-0.684435	-0.61031	0.316154	0.516743	0.996067	0.674581	-0.501249	-0.154247	-0.13875	0.187696	0.0203686	-0.243765	-0.013443	-0.453131	0.673739	0.381225	0.346157	-0.0101452	-0.0789013	0.191965	0.264757	0.307633	-0.163116	-0.677403	0.0487576	0.88987	0.908522	-0.489195	0.148859	0.728384	0.142424	-0.15398	-0.0847788	-1.65555	-0.101635	-0.0817852	0.172837	-0.0769558	-0.0999498	-0.00855446	0.176765	0.00855446	-0.0796537	0	0.248023	0.187819
201327_s_at	CCT6A	0.140397	-2.16757	-0.601662	-0.32041	0.78586	0.444932	1.65711	1.3519	-0.153553	0.000436	-0.341316	-0.0954342	-0.152492	-0.27508	-0.216283	-0.564809	1.14297	0.0182257	0.266996	0.00821018	-0.000436	0.0638933	0.623751	0.202057	0.49824	-0.438959	0.458398	1.4142	1.24153	-0.132256	0.495067	1.23715	-0.0986271	-1.07292	-0.119976	-2.5781	-0.538446	-0.0212679	0.123862	-0.0590467	0.0212679	-0.32226	-0.894538	0.671623	-0.000686	-0.269686	-0.137743	-0.108562
201328_at	ETS2	-0.965675	-0.97134	-1.62063	-0.244868	-1.80406	-1.0887	-1.02074	-0.943689	-0.6006	0.803632	-0.226326	1.41765	1.24511	1.80243	1.73259	1.83037	0.419559	0.059989	1.73444	-0.059989	0.18456	0.216853	0.216833	-0.184149	0.0315704	0.453084	1.36704	0.16439	-0.276844	0.160984	-0.431253	0.956093	-0.748636	-0.0315704	-1.20841	-1.77886	-0.305408	1.40585	0.888063	0.146858	1.5003	-0.257654	-1.15194	-0.315477	0.896326	-0.0905552	1.55559	1.31035
201329_s_at	ETS2	-0.403297	-1.00574	-0.713486	-0.987385	-0.696118	-0.00614405	0.213086	0.00614452	0.277011	0.254171	0.26802	0.360511	0.39731	0.755306	1.00027	-0.105577	-0.525072	-0.0657091	1.18173	-0.112369	0.0206394	-0.351009	-0.318844	-0.576641	-0.305162	-0.0378418	0.641686	0.381483	-0.014329	0.568718	-0.417349	0.014329	-1.14744	0.280062	-0.982734	-0.477969	-0.332264	0.361312	0.186388	-0.58865	0.737928	0.254812	0.4351	0.125681	0.248914	0.224483	0.284185	0.455852
201330_at	RARS	0.0807323	-1.60444	-0.835087	-0.960389	0.143534	0.0987301	0.579098	0.321237	-0.673741	-0.261955	-0.36045	0.0470448	0.0192375	-0.15222	0.0744801	-0.0431175	-0.0192375	0.20256	0.0616608	0.0596027	-0.0928698	-0.153909	0.222199	0.0169115	0.490254	-0.576448	0.780574	0.503301	0.421289	-1.04747	-0.381143	0.372334	-0.0169115	-0.801483	-0.494026	-1.65041	-0.707957	0.0593405	0.182972	0.556835	0.316066	-0.143344	-1.44316	-0.459495	-0.313148	-0.369652	0.130249	-0.0141973
201331_s_at	STAT6	0.740676	-0.742295	-0.0838375	-0.0364408	0.0987768	0.393827	-0.0769949	-0.373779	-0.0739994	-0.213802	0.11174	0.186564	-0.204874	0.135479	-0.0423632	-0.00297356	0.00297356	0.208012	0.162482	-0.508098	0.0882397	0.0701046	-0.262102	0.466543	0.176394	0.0480347	0.491352	0.131418	-0.0179634	0.293831	-0.523237	-0.359884	-0.53113	-0.295128	0.246651	-0.592677	-0.268288	0.0179634	-0.0429058	0.230837	-0.0543079	-0.877878	0.889065	0.292957	-0.279221	0.00906181	0.0761585	-0.149364
201332_s_at	STAT6	0.0105381	1.10672	0.429968	0.256585	-0.135944	0.0374436	0.163485	-0.212392	0.0226707	0.0755606	-0.252771	0.0142374	-0.0325031	-0.0187883	-0.0133791	0.0776725	-0.459574	0.20376	-0.45426	-0.0282135	-0.0502539	-0.0105381	-0.421571	0.35868	-0.0154381	-0.111171	-0.127577	-0.113463	-0.438634	-0.154136	-0.13315	-0.688814	0.0154381	0.31228	0.395987	1.0669	0.098835	0.193303	0.229401	0.127732	0.0478806	-0.215954	-0.190633	0.151452	-0.0663085	-0.292719	-0.15531	0.00121355
201333_s_at	ARHGEF12	-0.169614	0.590617	-0.658012	-0.100598	-1.08897	-0.40984	-0.872086	-0.983513	-0.865493	0.48763	0.461396	1.42182	0.81539	0.527925	0.658473	-0.287941	-0.136196	0.264465	1.10993	-0.26291	0.212151	0.100598	-0.531265	0.669624	0.834548	-0.406149	-1.04992	-0.0798879	-0.314865	-0.0673862	-0.453304	-0.0820451	0.203713	0.385483	0.978765	0.0673857	0.17625	0.420095	1.22676	0.322934	0.803169	-1.0071	-0.153672	-0.14802	0.439401	0.556648	1.19561	0.812327
201334_s_at	ARHGEF12	-0.909056	-1.24628	-2.00999	-0.825635	-1.05061	-0.131742	-0.360107	-0.427953	-0.63572	0.281002	0.21356	0.547287	0.457013	0.315776	0.196962	0.432254	0.392082	-0.114498	0.471787	-0.366951	0.445152	0.114498	0.296648	-0.55554	0.34645	-1.47161	-0.403469	0.495414	0.290633	-0.515394	0.349874	0.678758	-0.29381	-1.50686	-0.466738	-1.80919	0.127946	0.342787	0.189753	0.681443	0.362982	-1.40257	-1.35854	-0.127945	0.435406	0.388357	0.779995	0.582429
201335_s_at	ARHGEF12	-1.27546	-0.56774	-1.86788	-0.797952	-2.39985	-1.51877	-1.15576	-1.33891	-1.43612	0.35239	0.507072	1.25659	0.805791	1.13811	0.923647	1.10291	1.21701	-0.138098	0.859856	-0.414204	0.205339	0.138098	0.714133	0.0233455	0.6922	-0.236651	-0.720861	0.563154	0.189872	-0.133506	0.631356	1.31887	-0.40128	-0.447811	-0.0760546	-0.551381	0.0424795	0.836274	-0.023345	0.612978	0.329896	-0.327112	-1.17029	-0.374013	1.03737	1.02654	1.97921	1.54998
201336_at	VAMP3	-0.0932884	-0.723202	-1.48132	-1.00692	-0.237744	-0.135213	-0.0991297	-0.0592175	-0.365726	-0.118514	0.103619	0.100298	0.128662	0.27881	0.0592175	0.290411	-0.46886	0.368875	0.730714	0.28474	0.236402	0.294194	-0.224593	0.251014	0.11735	-0.457385	0.00166035	0.292143	0.456453	-0.425927	-0.386311	-0.284714	-0.146543	-0.60255	0.392974	-1.80249	-0.518438	0.137437	0.185769	0.0831699	0.125104	-0.00166035	-0.557209	0.454826	-0.0445557	0.215422	0.198433	0.187777
201337_s_at	VAMP3	-0.328941	-0.457525	0.738756	-0.396154	-0.189097	-0.501099	-0.11296	0.160044	-0.105782	0.416351	0.0103073	0.0318475	0.222902	0.159405	-0.0103068	-0.0113626	0.740485	0.70176	1.16703	-0.364039	-0.0745411	0.426868	0.157259	-0.035954	0.621807	0.0619249	-0.653243	0.183472	-0.0691633	0.197111	-0.354339	0.0135384	-0.506273	-0.135585	-0.148138	-0.493176	0.222466	0.600865	0.375619	0.310472	0.165969	-0.975535	-0.0756998	-0.0135384	0.211379	-0.210182	0	0.214136
201338_x_at	GTF3A	0.462754	0.256841	-0.128164	0.117686	0.336885	0.47965	0.500761	0.33708	-0.378338	-0.0709896	-0.0729179	-0.573771	-0.128059	-0.0139523	0.0139523	-0.142164	-0.224888	0.0996714	-0.434248	0.101995	-0.0553474	0.283548	-0.119787	0.0107317	0.0708475	0.0943346	0.383084	0.0628681	-0.157779	-0.790985	-0.368556	0.0126162	0.0348396	-0.38306	0.43295	-1.87252	-0.290363	-0.397983	-0.0107317	0.205455	0.0331574	0.513968	-0.728221	-0.479946	-0.0872488	-0.0325708	-0.573016	-0.108291
201339_s_at	SCP2	0.263346	-1.54183	-1.44459	-0.47455	0.308708	1.00309	1.6403	1.5068	-0.260455	0.437675	-0.0577612	-0.112723	0.0774889	-0.229139	-0.195183	-0.100327	0.59142	0.0577612	-0.0839262	-0.0751896	0.311015	0.150054	0.211252	-0.816756	0.401543	-1.47867	-1.78404	0.896022	0.832795	-1.73747	-0.0171194	0.656886	0.0810232	-1.88471	-0.679411	-2.73549	0.0171204	0.0632181	0.163962	0.257986	0.287866	-0.999636	-2.28701	-0.368917	0.331667	-0.173076	-0.195793	0
201340_s_at	ENC1	-0.823637	-0.674739	0.740472	0.593064	-0.675457	-0.934377	0.0554862	0.0239058	0.681563	-0.426023	0.879919	1.58853	-0.267647	0.356112	0.467398	-0.642503	-0.172681	-0.424591	0.448124	-0.635854	0.868507	-0.0239058	0.0517898	-0.393133	0.497587	1.39217	0.997679	0.809815	0.138764	1.08383	0.389016	1.12589	-0.560901	-0.424123	-0.224981	-0.788926	0.0961108	-0.315328	-0.134757	-0.164016	0.477334	-0.229399	-0.0517898	-0.310075	0.177668	0.993138	1.91896	0.0322194
201341_at	ENC1	-0.608891	-0.107856	-0.189379	0.173291	-0.676658	-0.387907	0.624827	0.658406	0.715608	-0.0542474	-0.10452	0.834154	-0.290935	0.386269	0.530787	0.0542469	0.403956	-0.413692	0.428326	-0.549004	0.439075	-0.257189	0.791907	-0.594812	1.15347	0.664772	0.54109	0.787247	0.520485	1.00783	0.947662	1.7494	-0.527196	-0.691017	-0.781605	-0.966354	-0.0515685	0.222102	-0.493088	-0.322808	0.0515685	-0.163898	-0.373139	-0.650597	0.121537	0.211622	1.53896	0.0466528
201342_at	SNRPC	-0.0204086	0.23722	0.104518	-0.196621	0.0947075	-0.362323	-0.87636	-0.757297	-0.0114574	0.0507107	0.0698652	-0.125887	-0.132364	-0.279078	-0.0955429	0.0114574	-0.35731	0.43207	0.301084	0.396724	0.138577	0.293048	0.0726156	0.359377	-0.112898	0.618328	-0.0816269	-0.704504	-0.274723	-0.0404282	-0.185786	-0.293447	0.474796	0.219748	0.483198	-0.232018	0.111487	0.0269566	-0.0269566	-0.0379648	-0.0811005	0.495975	0.273331	0.488935	-0.104989	0.111225	-0.164887	-0.141035
201343_at	UBE2D2	-0.230068	0.498101	-0.171492	0.143732	-0.544931	0.0120363	0.799455	0.654012	-0.756719	-0.0346079	-0.107831	0.0866737	-0.111683	0.14346	-0.0120363	0.172394	0.715244	-0.554873	-0.153164	0.0200567	-0.176905	0.055438	0.205058	0.0165319	0.379524	0.133057	-0.108057	0.752502	0.50668	-0.534908	0.753504	0.768374	0.0707464	-0.0165319	-0.116919	-1.24563	-0.25709	-0.15298	-0.204522	-0.21974	0.101991	0.614529	-0.362736	-0.340489	0	-0.0640221	0.0854425	0.00309372
201344_at	UBE2D2	-0.0925708	1.28448	1.18914	-0.191935	-0.557235	-0.675432	-0.0877161	-0.0144997	-0.819059	-0.0691867	0.216339	0.37649	0.370616	0.859749	0.51788	0.769322	0.617205	-0.502752	-0.0376511	0.00427342	-0.00427342	0.280712	0.128046	0.0431266	0.167204	-0.0434604	-0.616829	-0.270271	-0.208646	-0.343079	0.973001	1.15986	-0.241966	0.121352	0.262338	-0.311591	-0.347239	0.613084	0.0374303	-0.28434	0.324708	-0.0374303	0.153549	-0.496446	-0.22589	0.0450635	0.244189	0.238188
201345_s_at	UBE2D2	0.353356	0.276559	-0.0594149	0.304028	-0.448975	-1.024	-0.664975	-0.820396	-0.880553	0.162086	-0.198665	-0.0288134	0.0936651	0.385869	0.151508	0.249428	-0.350181	0.281009	0.242671	0.0288134	-0.288753	-0.216716	-0.0775766	0.691769	0.40484	0.341172	0.235139	-0.650301	-0.727381	-1.05042	-0.646547	-0.286615	0.355582	-0.211813	0.148333	-1.03595	-0.176316	0.355157	0.0397959	0.117038	0.0685015	0.188592	-0.0397959	-1.08247	0.263169	-0.178699	0.0112801	0.193602
201346_at	ADIPOR2	-0.286039	-0.273939	-0.56418	-0.513896	-0.247093	-0.359203	-0.253143	-0.493244	0.530529	-0.0801773	0.0322838	0.365842	0.461808	0.778087	0.66964	0.900301	-0.160915	0.112837	0.254781	-0.0322838	0.136688	0.0968313	0.0941715	-0.228762	0.750344	-0.364343	-0.634459	-0.136188	-0.219486	-0.0802832	0.0802832	0.640005	-0.342909	0.327665	-0.166155	-0.532849	0.465925	0.125987	0.523651	0.523651	0.646592	-0.437283	-1.16796	0.394909	-0.197085	-0.210988	0.315742	0.334628
201347_x_at	GRHPR	-0.0510206	-0.850547	-1.49498	-0.920073	0.0510206	1.03815	-0.147427	0.965972	0.623684	0.690446	0.0856104	-0.537024	-0.204924	-0.512605	-0.264417	-0.475292	-0.222349	1.09767	0.275016	0.5502	0.791821	0.142204	0.612096	-0.0130014	0.0872068	-0.700401	-2.17895	-0.335052	0.836784	0.0130014	-0.848751	-0.817241	0.562205	-0.0731525	0.82045	-0.844128	0.537834	-0.167718	0.490088	-0.0916576	0.0556478	-1.55473	0.991314	1.69067	0.518083	-0.126803	-0.697144	-0.409533
201348_at	GPX3	0.440806	-1.37522	-5.60133	-0.796881	0.475003	0.792982	0.80395	0.447064	-0.209254	0.279395	-0.40755	-0.450967	0.125028	-0.355942	0.0321569	-0.0578175	-1.69145	0.31158	-0.156337	-0.0321569	0.233777	0.351283	0.162852	-0.324797	0.339633	-2.97454	-3.72823	0.42298	0.146945	-2.43275	-0.0107241	-0.962493	0.029808	-1.39056	-0.137395	-2.8577	0.0107241	0.284	0.320971	0.291377	0.240458	-2.94259	-0.218613	0.300595	0.117595	-0.562148	-0.578608	0
201349_at	SLC9A3R1	0.505295	-0.14992	-2.02965	-0.75962	0.758241	1.24228	0.410113	0.443577	-0.619254	0.202099	-0.0810537	-0.253115	-0.0842829	-0.182761	-0.103928	-0.331489	-0.549459	0.821507	0.0875101	0.331107	0.295207	0.0810537	0.00219727	-0.751847	0.234044	-1.50176	-2.23263	0.390162	0.554132	-1.34185	-0.420377	-0.927377	0.171147	-0.285374	0.657468	-0.924166	-0.00219727	0.217084	0.360021	0.379296	0.1892	-2.313	0.435972	-0.241825	0.0527916	-0.270941	-0.451781	-0.354792
201350_at	FLOT2	0.635416	-0.0672674	-0.311483	0.123765	-0.00149345	1.10074	0.467551	0.198573	-0.0112896	0.116898	0.0490818	-0.272421	-0.285879	-0.222714	-0.161433	-0.230917	-1.17136	0.152503	0.143692	0.219747	0.00149345	-0.200461	-0.00818348	0.769665	0.688125	0.350535	1.1947	0.887083	0.187201	0.222023	-0.142959	-0.497703	-0.490126	-0.522541	0.31953	-0.524941	0.00818348	-0.252852	0.0845728	-0.0414848	0.0261517	-0.268569	-0.106309	-0.232811	0.194064	0.224703	-0.143703	-0.235109
201351_s_at	YME1L1	-0.0514526	-0.274048	-0.320128	-0.341827	-0.212149	-0.0659199	0.18202	0.138512	-0.456151	-0.13036	0.0136681	-0.0136681	-0.0183363	0.133402	0.0837288	0.15336	0.342701	-0.0961533	0.260059	0.120066	0.110466	0.501698	0.111379	-0.00544071	0.21638	0.137477	0.224796	0.480593	0.280138	-0.549661	0.00544071	0.520615	-0.128268	-0.438857	-0.487411	-1.97949	-0.468084	-0.0591469	0.0431757	0.114676	0.21389	-0.609139	-1.51289	-0.210714	-0.0845776	0.0410519	0.054431	0.0783005
201352_at	YME1L1	-0.284767	-0.0320148	-0.1923	0.0358973	-0.0670366	-0.202118	-0.237096	-0.197029	-0.247781	-0.0486784	0.0320148	0.189134	0.18294	0.300232	0.249496	0.366088	0.165528	-0.104473	0.041501	-0.278208	0.22834	0.239647	0.260776	-0.298385	0.180417	-0.0780716	-0.0217495	-0.146717	-0.174334	-0.539879	0.523104	0.637133	-0.0807037	-0.249779	-0.145746	-1.16841	0.0217495	0.433862	0.138105	0.43267	0.453847	0.127499	-0.306423	0.0546999	-0.100732	-0.0424881	0.223612	0.172047
201353_s_at	BAZ2A	0.0641675	0.0266247	0.838281	-0.0195351	0.289274	0.0173297	-0.166876	-0.494813	0.251972	0.334438	-0.0564594	-0.430865	-0.13488	-0.350486	-0.297514	-0.280044	-0.0173297	0.0583076	0.139369	-0.0632796	0.479599	0.0435467	-0.23515	0.109268	0.0184331	0.0313444	-0.139836	-0.50376	-0.36278	0.0723014	0.441378	-0.502726	-0.0224304	-0.394501	0.258585	0.677539	0.292701	-0.392433	0.039937	-0.0184331	-0.0562615	-0.279401	0.261454	0.319515	0.186735	-0.0572619	-0.533525	-0.302792
201354_s_at	BAZ2A	-0.0148439	0.532888	0.286024	0.612881	0.0777922	-0.198612	-0.81406	-0.525746	0.704038	0.102018	-0.00332832	-0.173618	0.108723	-0.152186	-0.260039	0.0774045	0.239147	-0.0108061	-0.462422	-0.271335	0.0033288	0.0346551	0.109672	-0.191348	-0.151754	0.196075	-0.120337	-0.627051	-0.142573	0.104554	0.510761	-0.170986	0.366237	-0.0456018	0.165185	0.340584	0.198218	0.0167508	-0.0167508	-0.350136	-0.26999	-0.141892	0.580871	0.27684	0.0075717	0	-0.245167	0.00613165
201355_s_at	BAZ2A	-0.312079	0.702821	0.210863	-0.00199175	0.0999308	0.0302234	-0.970467	-1.01833	0.128174	-0.25161	-0.0525608	0.133961	0.264913	0.015492	0.192076	0.152749	-0.0390472	-0.0467062	-0.163938	0.00199223	-0.265289	-0.244096	0.0690618	-0.289424	-0.190206	0.13098	0.0324655	-0.636807	-0.129492	-0.0176997	0.184588	-0.0353832	0.312975	0.586162	-0.133491	0.119864	0.0176997	-0.166385	-0.11583	-0.138243	0.0856876	0.242064	0.643736	-0.0456362	-0.144601	-0.0151	0.361786	0.317087
201356_at	SF3A1	0.00104237	-0.511257	0.093051	0.0131741	-0.287241	-0.309787	0.0913277	0.0131512	-0.292533	0.0440636	-0.0915585	0.149387	-0.132357	0.216144	0.268993	0.195255	-0.361843	-0.00104237	0.217696	-0.0820169	-0.19745	-0.0609531	-0.00241661	-0.244346	0.848083	0.431877	0.0551548	-0.0913458	-0.0205965	-0.459554	0.598113	0.631593	0.00241661	0.178665	-0.262873	-0.910825	0.0611792	0.367311	-0.00904846	0.153423	0.171265	-0.485433	-0.158526	-0.73576	0.0511932	-0.0802011	0.176444	-0.155697
201357_s_at	SF3A1	-0.00667524	0.025775	-0.121791	-0.135609	0.112354	0.634684	0.38966	0.685864	0.388586	-0.0286798	-0.0794649	-0.278687	0.136602	-0.123237	0.0707107	0.00992346	-0.167128	-0.270646	-0.0602331	0.0302815	-0.248968	0.00667524	0.138729	-0.335825	-0.0801172	-0.401744	0.224076	0.368936	0.201859	-0.0998549	-0.0195022	-0.191363	-0.330481	0.101106	0.00719833	0.259958	0.0651026	-0.00719833	0.189457	-0.0244021	-0.149339	-0.121542	0.637827	0.348379	-0.254304	-0.181339	-0.280319	0
201358_s_at	COPB1	0.0983496	0.293547	0.894256	-0.11447	-0.00056	-0.31807	-0.201681	-0.11799	0.0291557	-0.154943	0.168591	0.0633574	0.0575037	0.0125723	-0.0704012	0.17677	-0.0426006	-0.066391	-0.16163	-0.189386	0.000561	0.191985	0.29309	-0.453538	0.029232	0.356681	-0.155001	-0.451868	-0.173002	-0.514407	0.733996	0.640509	-0.325673	-0.525977	0.208352	-1.10452	0.165679	0.0625362	-0.119518	-0.0292311	0.129153	-0.150349	0.0365076	0.344047	-0.144295	0.121711	0.0546398	0
201359_at	COPB1	0.183573	-1.32323	-0.214089	-0.206931	-0.0676041	0.284408	0.947735	0.955943	0.00761318	-0.136177	-0.237271	0.0815716	-0.203774	0.130178	0.0300379	-0.00761318	0.467994	-0.152501	0.259717	-0.313825	0.0540628	-0.0505009	0.383529	-0.44273	0.68827	0.0275984	0.224815	0.453018	0.439676	-0.6081	-0.0319853	0.606669	-1.02107	-1.79787	-0.0566006	-1.81701	-0.118402	0.206494	-0.0275984	0.187084	0.272244	-0.95158	-1.74859	0.0518951	-0.18012	-0.247518	0.0390854	-0.216325
201360_at	CST3	1.32149	-1.33071	-1.52274	-0.671689	1.37669	1.16959	0.910124	0.884054	1.02127	-0.0286121	-0.0773621	-1.11412	-1.07016	-1.30007	-1.12238	-1.42689	-1.71154	0.547868	0.478819	0.86198	0.0286121	0.0726519	0.0937958	0.362695	0.172282	0.410398	0.179922	1.35502	0.753337	0.725542	-1.0808	-0.937509	-0.148542	-0.140594	-0.0937958	-1.21246	-1.05584	-0.633645	-0.45572	-0.751437	-0.74174	0.278309	1.53853	0.71719	0.364582	0.388261	-0.444581	-0.531568
201361_at	TMEM109	-0.358308	-0.644475	-1.55399	-0.545819	-0.386907	1.08891	0.655502	0.58846	-0.0365858	0.221141	0.0190449	-0.0173597	-0.202895	0.196487	-0.078311	-0.0120974	-0.680363	0.0865955	0.804026	0.0666504	0.212367	0.0120974	0.13507	0.251563	0.587473	0.136703	0.667105	0.645298	1.07756	-0.173397	-0.52444	-0.437984	-0.486545	0.0947418	-0.236371	-0.950011	-0.207428	0.0484753	-0.0297203	-0.0303173	0.0297203	-0.481249	-0.0685959	0.291933	0.566361	0.230017	0.176683	0
201362_at	IVNS1ABP	0.0678759	0.765174	0.0460224	-0.701985	0.15149	0.827983	1.22225	0.781971	-0.0470581	-0.0756988	0.275143	-0.255437	-0.741406	-0.293223	-0.395338	-0.073638	0.618634	-0.0460224	-0.491163	0.297173	-0.13248	0.16449	0.247207	-0.299535	0.110696	-1.87013	-0.522916	0.285605	0.196746	-1.11558	0.0502253	0.316283	-0.450765	0.174855	-0.364252	-1.90643	-0.00392818	0.113417	-0.569764	0.134906	-0.196553	1.43927	0.00392818	-0.692916	-0.304865	-0.0231228	-0.412004	-1.034
201363_s_at	IVNS1ABP	0.1721	0.814206	0.492008	-0.103655	-0.16321	0.515325	1.17654	1.01974	0.640512	-0.0553679	0.246556	-0.0545645	-0.48697	-0.154103	-0.279593	-0.0102944	0.876066	0.0570326	-0.921789	-0.126806	-0.143599	0.010294	0.548003	-0.216643	-0.00376797	-1.11717	-0.953919	0.825637	0.627997	-0.148054	0.42642	0.572217	-0.291454	0.673554	-0.500884	-1.31611	0.522478	0.294745	-0.418102	0.00376797	-0.0602531	1.41848	-0.366436	0.354672	-0.199233	0.127262	-0.239855	-0.753777
201364_s_at	OAZ2	0.176928	-0.243706	0.243452	-0.405637	0.11974	0.357175	-0.0355544	0.112745	0.763275	-0.340064	0.0216589	-0.0216584	-0.295184	-0.292663	-0.241926	-0.523349	-0.0606294	0.229055	0.3248	0.410039	-0.254642	0.0476947	0.226276	0.221993	-0.325059	0.306737	-0.084805	0.148896	0.228492	0.4566	-0.144909	-0.809309	-0.0862861	-0.205986	0.140186	0.200624	-0.0584106	-0.372822	-0.213377	-0.268703	-0.320962	0.0584111	0.597501	0.487152	-0.242118	0.0249233	0.115214	-0.236368
201365_at	OAZ2	0.272753	-0.557703	-0.627135	-0.0489464	-0.414679	0.244904	-0.165598	-0.0979223	-0.000566	0.24586	0.162958	0.555398	0.190432	0.391218	0.143939	0.126092	-0.127375	-0.509114	-0.241715	0.534443	-0.127835	0.000566	0.18555	0.14781	0.0377655	0.0712185	0.307583	-0.100883	-0.150932	0.138808	-0.0377655	-0.18186	0.567326	0.132607	-0.478766	-0.343431	-0.083044	-0.149471	-0.489429	-0.0967808	-0.195409	0.207886	0.147487	0.165909	0.294577	0.164652	0.558453	0.311839
201366_at	ANXA7	-0.186537	0.571492	0.0347385	0.298174	0.0539741	-0.215216	0.421556	0.630138	0.192034	-0.0481434	-0.348465	-0.0560837	-0.00477791	-0.0982399	-0.141441	0.00477791	0.709505	0.149572	-0.210487	-0.091465	-0.179571	0.0614557	0.336403	-0.653524	-0.329035	-0.431162	-0.839907	0.232329	0.090292	-0.352972	0.661023	0.114079	0.19096	-0.881786	-0.0843544	-0.909132	0.221273	0.0600891	-0.0600891	0.0759125	0.181771	-0.330192	-1.46382	0.411555	-0.0333529	-0.606697	-0.0676012	0
201367_s_at	ZFP36L2	-0.00277281	-0.104295	0.141469	0.256937	0.0664072	-0.0248308	0.103933	-0.161677	0.0733881	-0.0898657	-0.124633	0.0321801	-0.076818	-0.0869279	-0.22406	0.00277281	-0.0785537	0.260972	-0.104653	0.0691781	0.0200992	0.0691328	-0.127623	-0.0892024	-0.239663	-0.0209603	0.0133698	0.0735407	-0.126605	0.0947666	-0.199873	-0.49563	0.179573	0.123037	-0.156981	1.14822	0.16634	0.0493145	-0.0133698	0.147862	0.160779	-0.0872452	0.134138	-0.0842185	-0.0833507	-0.120286	0	-0.134564
201368_at	ZFP36L2	-0.0152855	-1.15337	-0.607418	0.404585	-0.713915	-0.469851	0.52517	0.254094	-1.1615	0.11221	-0.218855	0.271808	0.0152855	0.398403	1.06555	0.133856	0.125023	-0.227535	-0.446955	-0.849274	0.049408	-0.114075	0.378114	-0.596565	0.479067	0.127409	0.758901	0.34629	-0.144692	-1.31385	-0.2319	0.3849	-0.805129	-0.102894	-0.656528	-2.1165	-0.344752	0.872016	0.392141	0.102894	1.23458	0.246545	-1.61775	-0.949728	0.129575	-0.160768	0.365268	0.124232
201369_s_at	ZFP36L2	-0.00368166	-0.287676	-0.527988	-0.225108	0.192147	2.42002	2.13158	1.52431	0.948915	0.493046	0.367902	-0.521828	-0.669547	-0.524705	0.00368166	-0.709704	-0.934238	-0.148403	0.0261993	-0.535218	0.150716	0.0294604	0.008708	0.251747	-0.203448	-0.615224	1.51067	1.24817	1.37928	0.903833	-0.160872	0.723514	-1.5287	-0.176412	-0.215436	0.0990672	-0.00870752	-0.130136	-0.598138	-0.891548	0.263978	0.736906	0.927038	-0.0148935	0.488576	0.402486	-0.579173	-0.58902
201370_s_at	CUL3	-0.151532	-0.141535	-0.41766	-0.945656	-0.971069	0.238167	0.881412	0.75028	-0.896976	-0.04703	-0.11869	0.245549	0.00604105	0.310191	0.216129	0.419443	1.85241	-0.00604105	0.468815	-0.40959	0.133503	-0.0350299	0.890922	-1.08121	0.387001	-1.70743	-0.859787	0.801311	0.036943	-0.954643	1.2071	1.44619	-0.880913	-0.222004	-0.408442	-1.32386	0.0221171	0.282609	-0.0221176	0.278185	0.568954	0.63729	-2.58237	-0.0245519	-0.0656276	-0.0758953	0.219022	-0.074635
201371_s_at	CUL3	-0.148874	-1.90102	-1.25783	-0.280808	-0.00186539	0.050231	0.328524	0.234748	-0.282551	-0.28983	-0.144274	0.0187531	-0.177748	0.284165	0.288912	0.25008	0.34006	0.00186539	0.12997	-0.159858	0.0532246	-0.0198803	0.20739	-0.239548	-0.110353	-0.393146	-0.0253344	0.0557528	0.226047	-0.846037	-0.0888481	0.408376	-0.0787401	-1.30506	0.108053	-2.72297	-0.420891	0.411653	0.187993	0.321549	0.254853	0.0253344	-1.87468	0.236362	-0.333882	-0.249563	-0.123175	-0.286499
201372_s_at	CUL3	-0.252588	-0.330374	0.077589	-0.344433	-0.693817	-0.319188	-0.0454364	-0.0975604	-0.085474	-0.082633	0.0454364	0.665794	0.478802	0.383599	0.499571	0.653117	0.881249	-0.0720305	0.161136	0.0813537	-0.407936	0.45468	0.321547	-0.387488	-0.365129	0.0161672	-0.123724	0.193384	-0.0730734	0.366863	0.111049	1.16277	-0.28959	-0.0223312	0.18105	0.354971	-0.0161672	0.272612	-0.159788	-0.452683	-0.0189495	0.494767	-0.106366	0.167384	0.0480113	0.00117063	0.777917	0.515677
201373_at	PLEC	-0.346877	-0.0935307	0.0329647	-0.121924	-0.12323	0.687111	-0.0334034	-0.361445	-0.0310445	0.215525	-0.262232	0.0349531	0.031045	0.148932	0.293108	0.282129	-0.844993	0.064086	0.552855	-0.389572	0.051846	-0.201263	-0.323435	-0.14795	-0.0690203	0.137196	1.02536	0.0185366	-0.006392	0.00756884	-0.0528002	-0.603447	-0.0107851	0.165071	-0.129675	0.00978041	-0.461046	-0.226858	0.106177	0.179328	-0.0796704	0.00639248	0.557097	0.0560751	0.175617	-0.231824	0.210222	-0.00336504
201374_x_at	PPP2CB	0.0150423	0.360756	0.229334	-0.318189	0.00667429	0.461718	-0.397439	0.0263886	-0.0811544	-0.00437546	-0.0872822	0.00437546	0.0614123	-0.246751	-0.307115	-0.0717807	-0.127342	-0.370703	-0.239732	0.0481181	0.203419	0.057004	-0.379564	0.0413551	-0.198525	-0.333993	-0.186584	-0.248147	-0.0878463	-0.114478	0.0587015	-0.320438	0.180815	0.514463	0.154813	-0.0413551	0.252229	-0.0976014	0.0984607	0.12896	-0.0708561	0.375208	0.557636	0.334773	-0.215329	-0.112756	-0.0323715	0.0186195
201375_s_at	PPP2CB	-0.683288	-0.965624	-1.82228	-1.11939	-0.420444	0.216558	0.27293	0.316749	-0.952293	-0.159313	-0.254586	0.124363	0.00159073	0.188802	0.192382	0.189253	0.201278	-0.0682135	0.611167	-0.234318	0.113462	-0.00158978	0.331811	-0.181869	0.514925	-1.32479	-0.51049	0.975878	0.677889	-1.13848	0.331668	0.706939	0.025053	-0.834217	-0.194231	-2.36188	-0.220622	0.33148	0.316374	0.213394	0.45932	-0.280945	-2.83971	-0.025053	-0.0104208	-0.135971	0.153261	0.0533009
201376_s_at	HNRNPF	-0.128415	-0.639871	-0.134262	0.192851	0.280841	0.417235	1.3855	1.43771	-0.00798082	-0.157748	-0.253741	-0.0738764	-0.0764551	-0.191883	0.22612	-0.18516	-0.542287	0.0866532	0.00798082	0.338048	0.211252	0.106717	0.72753	-0.0813937	0.132602	-0.318692	0.681966	0.672696	0.684643	-0.0692687	-0.0621591	0.866362	0.637634	-0.565876	-0.519407	-0.649243	0.0251813	-0.0251813	0.136136	-0.02528	0.186689	-0.670083	-0.222672	0.148252	-0.0881624	-0.197888	-0.144092	-0.0622873
201377_at	UBAP2L	0.293099	-0.197712	-0.0288286	-0.0768118	0.548842	-0.0754604	0.596644	0.19778	0.00568771	-0.0315046	0.00709915	-0.00568771	-0.183075	0.0756435	0.0200033	-0.2105	0.143152	0.322992	0.328111	-0.0196657	-0.0475407	-0.132517	-0.406775	-0.299288	0.402193	-0.474039	-0.678284	0.607142	0.0655632	-0.247739	0.16568	0.42327	0.0384541	0.366121	-0.114294	-0.425521	0.167331	-0.147629	0.157032	-0.139298	-0.0384541	0.0714436	1.33242	-0.271652	-0.0863714	0.0153055	-0.00554657	-0.284126
201378_s_at	UBAP2L	-0.190717	0.0982909	0.516016	-0.0258064	0.247984	0.5218	1.14363	0.0560474	-0.339797	-0.39302	-0.0269465	-0.179095	0.129588	-0.38181	0.0223646	-0.47406	-0.477502	0.122497	0.218501	-0.0354972	0.0809488	-0.0223646	-0.0677743	-0.156076	0.0684772	-0.0279694	0.451035	0.257233	0.397154	-0.149938	-0.156546	-0.325327	0.107666	-0.360174	-0.256431	0.0724902	0.113122	-0.0896835	0.078043	0.115283	0.0201817	-0.0201817	0.301372	-0.0208945	-0.233489	-0.0426435	-0.303123	-0.182765
201379_s_at	TPD52L2	0.0753813	-0.60478	-0.829612	-0.0343533	-0.313478	0.86397	0.400514	0.223256	0.251955	0.0851498	0.101647	0.0877724	-0.157706	-0.0558271	-0.332506	0.0343533	-1.33984	-0.198003	0.186071	0.276851	-0.0484819	-0.123807	0.483063	-0.184258	0.279664	0.0503731	0.407484	0.613818	0.180991	0.513861	0.128333	-0.265085	-0.370254	-0.0503731	0.346706	-0.459709	-0.100048	-0.215768	-0.435682	-0.498624	-0.246192	0.216395	-0.30036	0.238236	0.203312	0.125188	0.23077	0
201380_at	CRTAP	0.339069	0.0403604	0.0104074	0.156915	-0.209757	-0.587896	0.0489893	-0.114525	-0.00842094	0.00842094	0.253641	0.346443	0.170785	-0.112489	0.169168	0.467832	-0.0652819	-0.532821	-0.18917	-0.449306	-0.384037	-0.358354	0.238695	0.110559	0.16937	-0.156694	0.115276	-0.170096	-0.288282	-0.440621	-0.244606	0.0317402	0.283895	-0.0696506	-0.166165	-0.207508	0.0920639	0.11188	-0.0317402	-0.0569668	-0.220981	0.531261	0.392296	0.111303	0	0.231719	0.323513	0.193591
201381_x_at	CACYBP	0.259673	0.527981	0.515222	0.233496	0.553609	-0.0583019	0.357863	0.399881	-0.172838	0.00221634	-0.0863762	-0.108385	-0.065897	-0.0860987	-0.241732	-0.349637	0.532684	-0.00221634	-0.172647	0.337048	-0.0822706	0.488258	-0.0785456	-0.383792	-0.364105	0.0591192	-0.91329	-0.179528	0.133779	-0.768433	0.707494	-0.0250664	0.175059	0.0634527	0.222136	-0.550214	0.226293	0.103756	0.0250664	-0.0712051	0.0762072	-0.0346279	-0.246914	0.0260401	-0.314507	-0.257291	-0.533399	-0.389968
201382_at	CACYBP	-0.371219	0.201483	-0.00168514	0.202505	0.069365	-0.168663	-0.906053	-0.829581	-0.160652	-0.166629	0.0445786	-0.145487	0.109738	0.00168514	-0.0639	0.209482	-0.053925	0.0396051	-0.151524	0.0175834	0.202505	0.358124	-0.275722	-0.0116673	-0.161526	-0.205732	-0.0110011	-0.807152	-0.483663	0.00615883	0.281289	-0.364309	-0.00891733	0.161083	0.28815	0.152895	0.138019	0.197812	0.332356	0.455907	0.0502696	0.504171	-0.00615883	-0.0278411	-0.307406	0.0610151	-0.205681	-0.0373583
201383_s_at	NBR1	-0.455863	0.00252438	-0.016705	-0.472682	-0.0828137	-0.078186	0.167649	0.249329	0.0406265	-0.315912	0.339848	-0.0025239	0.0961337	0.212974	-0.391404	-0.186452	-0.341135	0.281185	0.367543	0.411835	0.00699043	-0.0069437	0.687231	-0.183846	-0.215199	0.168226	-0.0294809	0.216049	0.247975	0.246286	-0.595456	-0.354771	0.303699	-0.270854	0.0294809	-0.718782	-0.268886	-0.142647	0.112075	0.176049	-0.0510144	-0.616642	0.672844	0.49032	-0.240309	0.187876	0.0468202	-0.0693345
201384_s_at	NBR1	-0.0977593	-1.64047	-1.00315	-0.317526	-0.332162	0.499759	0.664268	0.89184	-1.20072	-0.289418	-0.134412	0.177665	0.0422649	0.19372	0.15723	0.127534	0.886882	-0.290204	-0.0422649	-0.201768	0.170445	0.0762081	0.193644	-0.76397	0.41334	-1.05782	-0.139816	0.443296	0.805162	-1.42072	0.198283	0.142642	0.154971	-0.517168	-0.358408	-2.30774	0.156382	0.051486	-0.051486	0.384828	0.274033	-0.585428	-1.57529	-0.183931	-0.424504	-0.23165	0.107685	-0.0437183
201385_at	DHX15	-0.138732	0.0158939	0.348231	0.394566	-0.130553	-0.216061	0.299784	0.13681	-0.0455074	-0.312952	-0.385352	-0.0103216	0.086875	0.0103216	0.220685	-0.0239201	0.243536	0.188016	0.178673	-0.458967	-0.179104	-0.112214	0.106524	-0.399336	0.245229	-0.116503	0.0557375	0.174856	0.0118856	0.014801	-0.0118856	0.776408	-0.760872	0.045661	-0.113764	-1.59423	-0.128416	0.0683022	-0.11374	0.202524	0.148885	-0.107678	-0.835051	-0.097414	-0.312489	-0.426838	-0.0874853	0.0508528
201386_s_at	DHX15	-0.781638	-2.36571	-1.34872	0.139967	-0.22792	0.251293	1.67896	1.53691	-0.669907	-0.294544	-0.646651	-0.251904	0.0201316	0.201343	0.567094	0.132049	0.388261	-0.0404839	0.812579	-0.674284	0.354112	-0.0201316	0.923507	-0.575722	1.09109	-0.917554	0.865953	1.71574	1.32325	-0.319782	-0.691723	1.56269	-0.96707	-2.52543	-1.27517	-2.29879	-0.22744	0.40509	0.675207	0.818599	0.966891	-1.24929	-2.56059	0.227439	-0.287653	-0.63506	-0.21349	0.0867019
201387_s_at	UCHL1	-0.028089	0.0782919	0.236277	-0.649165	-0.141079	0.0407696	0.479668	0.35905	0.263424	-0.113812	0.816969	-0.175489	-0.376968	-0.639878	-0.504836	-0.419456	-0.746507	0.0280886	0.503395	0.445436	-0.178905	1.04468	0.040925	0.200405	-0.359209	0.0628071	-0.96159	1.26526	1.02026	0.826601	-0.255668	0.740404	-0.67646	-0.29186	-0.455046	-0.707744	-0.907005	-0.693002	-0.040925	0.0904684	0.308979	0.226758	-1.1391	0.923906	0.0238252	0.968876	0	-0.19815
201388_at	PSMD3	0.112142	-0.713892	-0.619484	-0.290311	0.0709929	0.448141	-0.522492	0.38288	0.51095	-0.0182438	0.268788	-0.41377	-0.942293	-0.519823	-0.642295	-0.773642	-0.503748	0.0182438	0.847659	0.611044	0.815271	0.365818	0.00703382	-0.121124	-0.147824	0.132271	0.353027	0.198084	0.339302	0.839352	-0.60974	-1.04865	-0.0900703	0.194643	0.194059	0.308346	-0.00703382	-0.725484	-0.565148	-1.01124	-0.450398	-0.46962	0.146479	0.646594	0.494319	0.625655	-0.177364	-0.267515
201389_at	ITGA5	0.0274487	0.160061	0.1097	-0.0274491	0.241799	-0.26005	-0.344708	-0.371225	-0.246355	-0.347682	0.120443	0.0616474	0.040843	0.0407023	0.572366	0.2523	-0.852377	-0.344967	0.912782	-0.16767	-0.213733	-0.682338	-0.13929	0.147616	-0.448192	0.380601	1.25889	0.0216656	-0.0943613	-0.106089	-0.24579	-0.584917	0.0537925	0.634356	0.0432982	0.297109	0.210386	-0.065805	-0.214079	-0.0216656	-0.281665	0.32229	0.679719	-0.394149	-0.211321	0.248198	0.111727	0.195901
[truncated: 18,987 more rows]
[truncated: 21 more columns]

## Sheet: Sheet1
ID	Gene Symbol							Name
1053_at	RFC2							PSMB8
117_at	HSPA6							IRF8
121_at	PAX8							IRF9
1255_g_at	GUCA1A							MX1
1316_at	THRA							BST2
1320_at	PTPN21							GBP2
1405_i_at	CCL5							IFITM2
1431_at	CYP2E1							ISG20
1438_at	EPHB3							IFITM3
1487_at	ESRRA							HLA-B
1494_f_at	CYP2A6							HLA-G
1598_g_at	GAS6							HLA-DRA
160020_at	MMP14							HLA-DPA1
[truncated: 19,807 more rows]

## Sheet: Sheet2
gene	GENE	PSMB8	IRF8	IRF9	MX1	BST2	GBP2	IFITM2	ISG20	IFITM3	HLA-B	HLA-G	HLA-DRA	HLA-DPA1	ITGB2	ITGAM	HLA-DPB1	PTPRC	CCL2	HLA-DMA	C1QB
[truncated: 283 more rows]
