# Supplementary material for: Identifying C1QB, ITGAM, and ITGB2 as potential diagnostic candidate genes for diabetic nephropathy using bioinformatics analysis
Source: PeerJ. 2023 May 25;11:e15437. doi: 10.7717/peerj.15437 (PMC10225123; doi:10.7717/peerj.15437)
Supplement: Supplemental Information 4 — A list of input genes for the String database [file peerj-11-15437-s004.xlsx]

## Sheet: Sheet1
Gene.Symbol	logFC
LTF	4.22978
LYZ	4.07189
CXCL6	3.95183
ALOX5	3.65636
IGJ	3.60642
MMP7	3.44704
TAC1	3.18544
VCAN	3.12776
C3	3.00762
PROM1	2.83761
TFPI2	2.83338
CYP27B1	-2.79153
TNC	2.76742
LAPTM5	2.74351
PTPRC	2.73754
FOSB	-2.55881
G6PC	-2.49329
TYRP1	-2.49112
EVI2A	2.48405
COL3A1	2.48326
CASP1	2.48237
VIM	2.47533
HLA-DPA1	2.46877
APOH	-2.46759
EGF	-2.45566
EVI2B	2.41658
IGHM	2.41077
PLK2	2.40346
RARRES1	2.39383
ETNPPL	-2.39109
MS4A4A	2.30804
IGKC	2.2816
ALDOB	-2.26091
RBP4	-2.25537
CPA3	2.24922
SERPINA3	2.24909
LUM	2.24368
THBS2	2.18991
C1S	2.17895
CD44	2.17658
CCR2	2.14412
TRIM22	2.13047
NRP1	2.10681
MOXD1	2.06997
KCNN2	-2.06879
PTPRD	-2.06429
ANXA1	2.05924
GZMA	2.05423
CLEC4A	2.05138
LY96	2.04927
HOPX	2.04699
COL6A3	2.04068
QPCT	2.02608
C1QB	2.0216
CAPN6	2.01945
TNFAIP8	2.00578
GADD45G	-1.96961
CX3CR1	1.93395
SPARC	1.92856
TIMP1	1.91967
ANXA3	1.91328
UMOD	-1.91184
THBS1	1.9038
MNDA	1.88346
POSTN	1.88341
PXDN	1.88017
CD53	1.86436
APOBEC3G	1.85976
CRISPLD2	1.85925
MS4A6A	1.8462
PSMB9	1.83975
LEFTY1	-1.80031
HS3ST1	1.78146
CES3	-1.77813
HLA-DRA	1.77781
CCL19	1.77589
PROC	-1.77575
CCL2	1.77295
TPM1	1.7638
CD163	1.75909
AGR2	1.75464
CSF2RB	1.75335
KRT19	1.74607
UPB1	-1.72902
HLA-DPB1	1.72755
OPCML	-1.72237
RNASE6	1.72167
CD48	1.71871
FMO5	-1.71859
SELL	1.71507
CEL	-1.71202
HCLS1	1.6879
MGP	1.6823
TCL6	-1.66559
PYCARD	1.66555
TYROBP	1.66181
FHL1	1.66018
PDLIM1	1.65748
SRGN	1.65155
DNMT3L	-1.65101
HTR2B	1.6506
CSTA	1.63847
COL15A1	1.63734
TMSB10	1.63721
FCER1A	1.63468
CD52	1.62861
FCGR3B	1.62201
MID1	1.61019
COL1A2	1.6045
KLK1	-1.60426
MRC1	1.60024
ZGPAT	-1.59681
TMSB4X	1.59655
WFDC2	1.59259
AOC1	-1.58848
GAD1	-1.58495
MARCKSL1	1.5748
CLEC7A	1.57039
APOLD1	-1.56935
GPC5	-1.56232
SLPI	1.55151
SLC16A7	-1.54617
IRF8	1.5435
ITGB2	1.53894
ANXA2	1.53306
HLA-DMA	1.52607
ADIRF	-1.52377
ARHGDIB	1.52063
HLA-DQA1	1.51233
CFH	1.5113
IGLL3P	1.50937
CGA	-1.50592
CD47	1.50388
AVPI1	-1.50273
CXCL9	1.49911
HLA-B	1.4991
DCXR	-1.49905
ZEB2	1.4969
FSTL1	1.49682
SERPINA6	-1.49322
PLAC8	1.49257
ITM2C	1.49067
FTCD	-1.4894
C7	1.48278
CDH11	1.48184
SOX9	1.48057
MICAL2	1.47593
ARPC3	1.47493
PON2	1.47221
CD69	1.46986
TGFBI	1.46874
PGK1	1.46782
AXL	1.46523
SLAMF8	1.46313
TGM2	1.46237
CLEC2B	1.45977
ECT2	1.45537
FZD7	1.45099
PFN1	1.44918
COL4A1	1.44759
GBP2	1.44759
PTGER3	-1.44403
LCP2	1.44383
TUSC3	1.43934
CORO1A	1.43557
APOC3	-1.43458
TMEM45A	1.43425
ZNF652	1.43224
CTSS	1.43059
ARPC1B	1.42932
REG1A	1.42557
PSMB10	1.42494
ACKR3	-1.4239
SLC2A10	1.42164
GLIPR1	1.42155
JAK1	1.42063
IL10RA	1.41724
S100A4	1.40632
IFI16	1.40329
ASPA	-1.40247
FHL2	1.39959
RCN1	1.39864
CCDC109B	1.39675
NELL1	-1.39
SCRN1	1.38947
PTPRE	1.38634
TLR7	1.38194
CHST15	1.38174
BIRC3	1.38171
DIP2C	-1.37969
CD83	-1.3789
TNFAIP2	1.37403
TPBG	1.37384
RGS4	1.36744
TRBC1	1.35947
ARSF	-1.35651
SLC26A2	1.35161
MTHFD2	1.35104
MARC2	-1.35042
LHFP	1.34973
SLC39A4	-1.34801
CXCL1	1.34428
NMI	1.34346
PPIB	1.34329
FLI1	1.343
PSMB8	1.34204
CCL5	1.34091
DYRK2	1.3356
FABP5	1.33401
TNFRSF17	1.33052
LPL	-1.32984
C1QA	1.32937
FOLH1B	-1.32873
HRG	-1.32755
TUBA1B	1.32614
PRKX	1.32532
IFI44L	1.32172
CRIP1	1.31937
GNB5	-1.31585
RALYL	-1.31456
FMO3	1.31406
ITGAM	1.30846
ETV1	1.30384
CES2	-1.30243
BTD	-1.30104
VCAM1	1.29884
KDELC1	1.2961
FCGR2A	1.29493
LOXL1	1.29369
TUBA1A	1.28746
PLSCR1	1.28622
KIAA0101	1.28013
NLGN4X	1.27638
ACKR1	1.27564
DEFB1	-1.27494
ITGA4	1.2725
KNG1	-1.27056
GLYAT	-1.26991
IGSF6	1.26893
FBP1	-1.26734
GHR	-1.26651
SLC2A4RG	-1.26596
CD2	1.26447
CYP46A1	-1.26282
CROCC	-1.26234
HRH1	1.26058
SAMSN1	1.26036
KLRB1	1.25967
LY86	1.2552
ACSL4	1.25376
FGF9	-1.24848
PPP1R16B	-1.24735
RAN	1.24668
FGL2	1.24655
IFNGR1	1.24604
IFITM3	1.24195
ACP5	-1.24191
FZD1	1.23985
BHLHE41	1.23768
TSKU	-1.23568
VSIG4	1.22912
PLEK	1.22442
LAMP3	1.22199
PSAP	1.21897
SPATA2L	-1.21668
ASB9	-1.21622
IFITM2	1.21617
PVALB	-1.21071
COX7A1	-1.20979
SLC46A3	-1.20664
SFRP1	1.20649
VTCN1	1.20584
PXMP2	-1.2041
HDAC9	1.20304
NXN	1.20008
EFNB2	1.19715
APOBEC3B	1.19552
ASNS	1.19547
SCGB1D2	-1.19476
CD1C	1.19474
MX1	1.19419
KDELR3	1.19113
PLA2G4A	1.191
RAP2B	1.18935
KL	-1.18914
CD36	1.18898
THY1	-1.18744
CASP4	1.18633
A2M	1.18616
LY75	1.18507
C1R	1.18015
LCN2	1.18009
RARRES3	1.17787
SPRY1	1.17777
SLC4A1	-1.17745
ACOT11	-1.17521
RAB31	1.17346
DSE	1.17263
C1RL	1.17235
KIAA0368	1.1696
TNFAIP6	1.16931
SRPX	1.16719
BST2	1.16619
GZMK	1.16447
HIF3A	-1.16396
M6PR	1.16165
CIDEB	-1.16127
RPS3	1.16083
HLA-DQB1	1.15921
CAPG	1.1592
TUBB	1.15867
NFIB	1.15616
NR1I3	-1.15616
ZNF264	1.15474
ICAM1	1.15295
PTBP3	1.15273
TCF15	-1.15203
ANXA5	1.15145
METTL1	-1.14635
WNT10B	-1.14565
MYC	1.14512
CST6	1.14471
DACT1	1.14237
ACTR2	1.14103
SERPING1	1.1396
FAM129A	1.13914
TCEAL2	-1.13905
FLRT3	1.13751
IGFBP6	1.13648
ESYT1	1.13549
KLHL21	-1.13484
PIPOX	-1.13399
STRA6	-1.13321
SIGIRR	-1.13095
DCK	1.1287
BLNK	1.12372
YLPM1	1.1236
ACSM5	-1.12166
VLDLR	1.12139
LPGAT1	1.12118
CD9	1.11964
RND3	1.11947
HLA-G	1.11867
YWHAH	1.11837
EAF2	-1.11746
MELK	1.11722
TES	1.11718
RNF186	-1.1169
TACR1	-1.11007
LTB	1.10714
MPHOSPH8	1.10533
NCF2	1.10463
MNS1	1.10391
MPZL2	1.10352
SOCS2	-1.10332
PTP4A2	1.10193
STK10	1.10083
ALDH3A2	-1.10023
ALDH1A3	1.09874
THYN1	1.09673
GPNMB	1.09584
BAIAP2	-1.09355
CYP4F12	-1.09254
RHOA	1.09166
PDIA6	1.08923
GUCY1A3	1.08885
CLDN8	-1.0869
FKBP11	1.086
WNT5A	1.08566
TRPM3	-1.08335
SERPINF2	-1.08146
ALDH4A1	-1.07754
RBBP4	1.07368
SWAP70	1.07145
TLR1	1.07106
MAFB	1.07021
LHPP	-1.06907
FAM184A	-1.06775
NEU1	1.06711
FCHSD2	1.06597
NR0B2	-1.06511
CYFIP2	-1.06492
RGS7	-1.06436
FZD2	1.0631
TSPAN1	1.06218
RNASE1	1.06101
LAMC2	1.05973
CLEC10A	1.05818
EFHD1	-1.05725
ESRRG	-1.05725
RAI2	1.05652
CEP57	1.05578
RASSF2	1.05574
PON3	-1.05539
UBE2J1	1.05429
DUSP9	-1.05348
TSPAN13	1.05339
PROZ	-1.0525
P2RY14	1.05164
ILF2	1.0508
HYAL1	-1.05014
TRIM16	1.04999
SYK	1.04942
COMP	1.0476
SKAP2	1.04755
ADCY7	1.0468
HOOK2	-1.04622
TGFB2	1.04495
CELF2	1.04483
ITGB3	1.04417
GPC4	1.0441
NAP1L1	1.04231
PLP2	1.04033
PSD3	1.03964
YBX3	1.03934
ZKSCAN7	1.03841
ANXA2P2	1.0383
SERPINE2	1.03806
MST1	-1.03612
PLEKHA1	1.03611
PECAM1	1.03587
PP13	-1.03562
IL7R	1.03441
MAST4	-1.03433
DCLK1	1.03393
DOK5	1.03368
GRIP2	-1.03363
MCUR1	-1.03336
MYOF	1.03088
FMO4	-1.03081
RPAP3	1.03077
DDOST	1.02979
GMFG	1.02975
SNF8	1.02797
F11	-1.0279
BRD7	1.02681
NOV	1.02559
CSTB	1.025
SETX	1.02435
PAK2	1.02383
CYTIP	1.0231
SELPLG	1.02175
VWF	1.01937
CLU	1.01844
RTN1	1.01805
ISG20	1.01802
FCN1	1.01757
ESPL1	-1.01647
IRF9	1.01599
HAAO	-1.01569
RB1	1.01556
CREM	-1.01347
SMARCD3	1.01314
ENAH	1.01043
FCGR2B	1.00881
RENBP	-1.00811
BAZ1A	1.00807
CD3D	1.00645
CCL20	1.0061
SAE1	1.00462
SNW1	1.00389
C1orf105	-1.00168
RITA1	-1.00066
