# Supplementary material for: Identifying C1QB, ITGAM, and ITGB2 as potential diagnostic candidate genes for diabetic nephropathy using bioinformatics analysis
Source: PeerJ. 2023 May 25;11:e15437. doi: 10.7717/peerj.15437 (PMC10225123; doi:10.7717/peerj.15437)
Supplement: Supplemental Information 11 [file peerj-11-15437-s011.xlsx]

## Sheet: Sheet1
Gene	Forward Primer (5' to 3')	Reverse Primer (5' to 3')
C1QB	TCAACAGCGCCCTGCGACCAAACCA	TGAACTTGCCACTGCGCGGCTCGTA
ITGAM	AAACCCGAGTGGTTGTTGCAGCCCC	ATGGGGTCGCACCGGTTTGTGCTGT
ITGB2	AGCCTGCCAGCCTCCGTTTGCCTTT	TGCATTATGGCATCCAGCCCGCCCT
HLA-DPA1	TTTGTGCAGACGCAGCACCCGT	AAGAGCCTCCTGGGCGTCAAACGCA
IRF8	ACCTGCAGCAGTTCTACGCCACCCA	AGTTTGGAGCGCAAGGGCGCTGTGT
